# Supplementary material for: Transcriptomic and Proteomic Analyses of Celery Cytoplasmic Male Sterile Line and Its Maintainer Line
Source: MDPI journal article supplement (doi:10.3390/ijms24044194), 2023-02-20
Supplement: s1 [file s1]

## Supplementary materials

Table S1 Summary of RNA sequencing and assembly

| Samples | Total reads | Clean reads | Mapped reads (%)    | Unique genes (%)    |
|---------|-------------|-------------|---------------------|---------------------|
| T01     | 46,131,424  | 23,065,712  | 38,882,611 (84.29%) | 36,146,434 (78.36%) |
| T02     | 47,762,330  | 23,881,165  | 40,137,395 (84.04%) | 37,252,942 (78.00%) |
| T03     | 51,021,184  | 25,510,592  | 42,805,351 (83.90%) | 39,789,111 (77.99%) |
| T04     | 47,468,316  | 23,734,158  | 39,978,670 (84.22%) | 37,027,177 (78.00%) |
| T05     | 47,172,798  | 23,586,399  | 39,763,260 (84.29%) | 36,598,988 (77.58%) |
| T06     | 57,251,824  | 28,625,912  | 48,833,251 (85.30%) | 44,905,793 (78.44%) |

Table S5 List of DEGs associated with anther and pollen development in celery

| Gene ID    | Description                                                        | Homologous   | Regulation(B/A) |
|------------|--------------------------------------------------------------------|--------------|-----------------|
| EVM0031399 | Tetraketide alpha-pyrone reductase 1                               | LOC108217645 | Up              |
| EVM0026892 | Protein STRICTOSIDINE<br>SYNTHASE-LIKE 13                          | LOC108198869 | Up              |
| EVM0001985 | 4-coumarate--CoA ligase-like 1                                     | LOC108198861 | Up              |
| EVM0000845 | Type III polyketide synthase A                                     | LOC108192424 | Up              |
| EVM0009695 | Arogenate dehydratase/prephenate<br>dehydratase 6, chloroplastic   | LOC108210565 | Up              |
| EVM0041100 | Phenylalanine ammonia-lyase-like                                   | LOC108224761 | Up              |
| EVM0000923 | 3-oxoacyl-[acyl-carrier-protein]<br>synthase I, chloroplastic-like | LOC108210280 | Up              |
| EVM0013046 | MFP1 attachment factor 1-like                                      | LOC108217673 | Down            |
| EVM0041577 | Peroxisome biogenesis factor 10-like                               | LOC108199858 | Down            |
| EVM0036709 | Linoleate 13S-lipoxygenase 2-1,<br>chloroplastic-like              | LOC108198193 | Down            |

Table S13 Potential regulatory genes involved in each pathway

| Gene ID    | Description                                  | Homologous<br>( <i>Arabidopsis</i> ) | Pathway                                                            |
|------------|----------------------------------------------|--------------------------------------|--------------------------------------------------------------------|
| EVM0031399 | Tetraketide $\alpha$ -pyrone reductase 1     | TKPR1                                | sporopollenin<br>biosynthesis process /<br>oxidoreductase activity |
| EVM0001985 | 4-coumarate--CoA ligase-like 1               | 4CL                                  | sporopollenin<br>biosynthesis process                              |
| EVM0000845 | Type III polyketide synthase A               | PKS                                  | sporopollenin<br>biosynthesis process.                             |
| EVM0041100 | Phenylalanine ammonia-lyase-like             | PAL                                  | oxidoreductase activity                                            |
| EVM0014167 | aldehyde dehydrogenase family 2<br>member B4 | ALDH2B4                              | glycolysis/glycogenesis.                                           |
| EVM0000599 | aldehyde dehydrogenase family 3<br>member H1 | ALDH3H1                              | glycolysis/glycogenesis                                            |
