# Supplementary material for: Transcriptomic and Proteomic Analyses of Celery Cytoplasmic Male Sterile Line and Its Maintainer Line
Source: Int J Mol Sci. 2023 Feb 20;24(4):4194. doi: 10.3390/ijms24044194 (PMC9967367; doi:10.3390/ijms24044194)
Supplement: Supplementary file 1 [file ijms-24-04194-s001.zip]

Archive with 17 entries (17 files):
- Figure S1.png
- Figure S2.png
- Figure S3.png
- Figure S4.png
- Figure S5.png
- Figure S6.png
- Supplementary.pdf
- Table S10.xlsx
- Table S11.xlsx
- Table S12.xlsx
- Table S2.xlsx
- Table S3.xlsx
- Table S4.xlsx
- Table S6.xlsx
- Table S7.xlsx
- Table S8.xlsx
- Table S9.xlsx
