# Supplementary material for: Transcriptomic and Proteomic Analyses of Celery Cytoplasmic Male Sterile Line and Its Maintainer Line
Source: Int J Mol Sci. 2023 Feb 20;24(4):4194. doi: 10.3390/ijms24044194 (PMC9967367; doi:10.3390/ijms24044194)
Supplement: Supplementary file 1 [file ijms-24-04194-s001.zip › Table S2.xlsx]

## Sheet: Table S2
Table S2. All DEGs between the sterile line W99A and the fertile line W99B
#ID	T01_Count	T02_Count	T03_Count	T04_Count	T05_Count	T06_Count	T01_FPKM	T02_FPKM	T03_FPKM	T04_FPKM	T05_FPKM	T06_FPKM	FDR	log2FC	regulated
EVM0000055	0	356	0	8287	13540	23816	0	7.94137	0	184.418	302.121	428.676	2.8263e-11	6.92884	up
EVM0000173	11	6	2	64	40	46	0.389029	0.254701	0.069353	2.46497	1.61202	1.47674	0.000134672	2.93975	up
EVM0000179	6247	7137	5710	2550	2783	2440	73.2856	80.5312	60.6025	28.9411	32.0525	22.6327	3.93338e-08	-1.29758	down
EVM0000268	1771	2281	2050	5089	6071	7882	12.9322	16.2738	13.7501	36.0794	43.4732	45.6573	9.62977e-13	1.62747	up
EVM0000305	0	3	0	89	272	264	0	0.045596	0	2.30113	7.84881	6.67651	3.10205e-08	7.65588	up
EVM0000350	8	5	4	252	113	113	0.174412	0.111309	0.068735	6.06527	2.72871	2.22065	0.000139446	4.80399	up
EVM0000386	687	907	733	263	350	5	15.2187	19.4895	14.8106	5.6799	7.60616	0.077291	8.64313e-05	-1.84587	down
EVM0000412	31	33	30	170	158	181	0.336015	0.346151	0.299456	1.83933	1.71933	1.59373	0.000102506	2.42842	up
EVM0000506	18	7	8	598	217	245	0.676869	0.254659	0.270951	22.3946	8.18666	7.47266	0.00131181	4.99354	up
EVM0000554	13	3	3	277	132	145	0.318405	0.06839	0.055457	6.61581	3.16676	2.8225	4.31772e-06	4.83466	up
EVM0000584	0	8	0	45	40	58	0	0.134916	0	0.746957	0.674716	0.796022	4.30223e-07	4.10548	up
EVM0000599	2973	3130	2892	11891	9109	11881	45.9377	47.9252	36.6086	155.087	119.144	135.23	4.08872e-14	1.85865	up
EVM0000696	294	155	270	3	11	14	7.15876	3.66606	6.00552	0.059537	0.251703	0.270102	4.03688e-12	-4.70485	down
EVM0000718	13	0	11	56	169	272	0.241109	0	0.198174	1.04562	3.25208	4.30004	0.0024079	4.34572	up
EVM0000732	10	5	17	62	52	74	0.239611	0.092209	0.305889	1.40741	1.41845	1.53472	0.00086591	2.56868	up
EVM0000736	25	11	12	158	280	283	0.162559	0.06788	0.065417	1.0009	1.80225	1.49442	4.36788e-11	3.88336	up
EVM0000739	1246	1068	962	534	432	489	20.9938	17.3584	14.7403	8.55334	7.1248	6.87183	0.000110377	-1.18222	down
EVM0000806	2	31	9	60	165	171	0.027502	0.593619	0.155017	1.58341	3.18882	2.95082	0.00163283	3.21625	up
EVM0000845	1454	2675	1544	76624	53644	83197	26.696	49.2668	26.2056	1363.49	969.232	1213.68	1.50354e-29	5.21092	up
EVM0000889	252	261	369	51	107	124	3.34144	3.70798	4.49169	0.53765	1.44614	1.42759	0.00210251	-1.64775	down
EVM0000897	5	5	0	185	209	243	0.138429	0.105965	0	4.92381	5.61554	5.18966	1.6227e-17	5.93101	up
EVM0000905	221	167	202	538	593	809	2.74498	2.0134	2.28774	6.61907	7.44284	8.15204	4.47098e-06	1.69977	up
EVM0000923	901	1051	1092	2803	1923	2482	13.303	15.0562	14.6953	40.3442	27.8854	29.1638	3.7475e-07	1.24092	up
EVM0000924	124	122	133	508	488	575	1.65976	1.59273	1.61954	6.6618	6.92451	6.15777	6.33826e-07	2.04579	up
EVM0000932	0	29	13	93	645	628	0	0.355095	0.140426	1.14972	8.128	6.39931	0.00563782	5.01676	up
EVM0000938	6	12	15	181	86	149	0.068725	0.133944	0.165837	2.14115	1.01913	1.43937	1.21216e-07	3.6645	up
EVM0000969	614	799	656	215	207	120	11.3783	14.3464	11.0685	3.87323	3.76429	1.7552	8.1114e-08	-1.91273	down
EVM0000983	1288	1567	1278	380	680	761	15.3775	18.7094	14.7281	4.56239	8.32911	7.49491	3.17881e-05	-1.19837	down
EVM0001022	29	10	21	491	385	570	1.42565	0.457443	0.91435	35.7051	29.3019	34.8711	2.02368e-21	4.57245	up
EVM0001082	2	12	0	71	326	332	0.048426	0.286613	0	1.70292	7.93088	6.54295	0.00027103	5.64628	up
EVM0001091	932	2190	1300	10240	28913	36905	19.7978	46.5828	26.0324	200.562	557.343	646.899	0.000217241	4.07816	up
EVM0001095	861	852	635	262	463	223	16.8779	16.1824	11.3332	4.99504	8.90098	3.47195	0.00441541	-1.29289	down
EVM0001253	492	388	494	243	125	128	11.9488	9.13917	10.9323	5.74755	2.96207	2.466	0.000912647	-1.46071	down
EVM0001260	670	682	739	1065	1587	1858	21.6464	20.2002	21.5946	31.9052	44.0509	41.6983	0.000891368	1.09871	up
EVM0001338	285	146	267	55	75	43	4.50759	2.08756	3.74376	0.78535	1.08691	0.558919	0.000526487	-1.98788	down
EVM0001357	1	19	11	52	67	97	0.038371	2.14784	1.16706	6.19622	8.01133	9.38362	0.000183054	2.79053	up
EVM0001394	352	337	531	33997	16940	19776	6.33061	5.99423	8.60808	590.297	296.384	280.377	2.45825e-10	5.87496	up
EVM0001457	13	18	25	198	93	216	0.334732	0.457904	0.603468	5.14195	2.43957	4.5867	2.39617e-06	3.17078	up
EVM0001565	7910	7754	5816	4120	3530	2068	238.616	226.822	159.903	121.052	104.504	49.6054	0.00749671	-1.13308	down
EVM0001596	559	608	836	257	276	237	7.63547	8.39731	10.4522	3.6584	3.91165	2.77273	0.000204537	-1.36052	down
EVM0001709	0	0	7	44	80	74	0	0	0.132122	1.02635	1.88176	1.40061	6.00321e-09	4.92932	up
EVM0001760	13	25	11	234	333	272	0.495467	0.964383	0.383395	9.20577	13.246	8.7501	4.00565e-13	4.08888	up
EVM0001799	82	74	84	719	949	1102	0.953085	0.829362	0.882734	8.80176	10.9881	10.3201	2.53612e-24	3.51921	up
EVM0001842	23	177	64	1232	2496	2811	0.260391	2.71371	1.0126	18.1393	35.7153	30.4445	1.0393e-09	4.61047	up
EVM0001870	13	18	5	211	184	166	0.174978	0.241746	0.06428	2.92866	2.5402	1.86242	3.69078e-10	3.93813	up
EVM0001934	89	72	83	327	298	266	3.05302	2.39687	2.5977	10.9471	10.0548	7.275	0.000366937	1.87335	up
EVM0001947	0	4	0	203	133	168	0	0.047454	0	2.44141	1.61149	1.64396	1.49745e-17	6.93432	up
EVM0001985	1890	1614	1662	36263	17576	22064	24.7967	20.5339	19.8744	463.93	226.504	230.462	2.82615e-06	3.87366	up
EVM0001994	17	14	0	62	73	99	1.21013	1.0054	0	4.49648	5.3187	5.87249	8.02547e-05	2.84421	up
EVM0002036	1261	1361	1332	3881	3688	4583	14.2609	14.9752	13.645	42.6222	41.3903	42.067	6.82257e-13	1.61002	up
EVM0002081	211	56	323	0	0	0	5.17997	1.76493	7.32377	0	0	0	1.72962e-06	#NAME?	down
EVM0002084	493	495	396	715	909	1365	9.06207	8.82109	6.63865	12.8165	16.4103	19.9831	0.00678736	1.0788	up
EVM0002104	543	688	586	4861	5707	6646	8.06637	9.91801	7.92991	70.3931	83.2745	78.5707	1.06423e-45	3.23305	up
EVM0002106	0	4	2	258	94	59	0	0.065492	0.041874	5.64749	2.08144	1.05496	0.00896394	6.1327	up
EVM0002133	322	399	326	724	645	898	46.4704	55.8276	42.8438	101.849	91.3864	103.114	0.00219494	1.09686	up
EVM0002188	0	4	8	59	82	134	0	0.059165	0.117427	0.932992	1.30741	1.73789	4.07374e-09	4.54784	up
EVM0002301	0	0	0	68	82	158	0	0	0	2.13552	2.6139	4.05478	7.22124e-13	Inf	up
EVM0002307	175	131	138	577	396	595	2.30315	1.67215	1.65681	7.43298	5.13379	6.25208	1.0276e-05	1.80057	up
EVM0002346	104	96	159	662	401	429	1.09077	0.97615	1.52219	6.78884	4.14235	3.592	0.000153147	2.0748	up
EVM0002371	234	272	488	134	98	94	1.66882	1.88439	3.1769	0.928473	0.683535	0.528876	0.00660759	-1.57802	down
EVM0002378	639	726	923	1639	1063	2105	15.3407	16.8927	20.1993	38.3364	25.0608	40.1937	0.00530566	1.05605	up
EVM0002389	14	1727	310	9757	47941	54714	0.251766	30.6739	5.16945	174.142	862.217	797.196	0.000265994	5.73892	up
EVM0002392	60	67	71	273	304	374	0.610613	0.638727	0.643256	2.62163	2.9417	2.93406	8.05949e-06	2.25609	up
EVM0002404	61	46	41	255	255	331	2.35388	1.4173	1.2074	8.54274	9.45133	8.8109	2.35772e-06	2.48233	up
EVM0002424	856	992	1087	506	412	416	13.754	15.4822	15.9138	7.95574	6.59359	5.32721	0.000352922	-1.1301	down
EVM0002425	0	23	0	407	1540	2318	0	0.45631	0	8.26332	34.7987	42.1459	5.77789e-06	7.46181	up
EVM0002444	119	120	60	383	644	991	2.46873	2.44451	1.18839	7.7976	13.3212	19.8684	0.000175146	2.70419	up
EVM0002468	5	21	17	63	53	108	0.09533	0.366342	0.439293	1.56808	1.53689	2.0188	0.0016136	2.3634	up
EVM0002480	50	26	24	129	163	229	1.82374	0.941203	0.763673	4.90118	6.41085	7.0928	0.000137371	2.34176	up
EVM0002495	40	16	18	196	78	141	0.575799	0.202583	0.216277	2.75446	1.12058	1.65275	0.00464617	2.4561	up
EVM0002510	193	151	154	514	493	658	5.45201	4.10261	3.94788	14.1266	13.5889	14.6878	1.46293e-05	1.72176	up
EVM0002533	24	3	6	588	274	171	0.42474	0.049694	0.094527	10.2552	4.81853	2.42334	0.00273683	4.95723	up
EVM0002589	718	609	425	64	137	86	21.7806	17.6968	11.1983	2.02274	4.09226	2.46502	3.36151e-06	-2.61124	down
EVM0002609	0	0	0	47	172	125	0	0	0	1.84739	6.85743	4.02413	1.41903e-06	Inf	up
EVM0002763	5	4	7	106	139	90	0.052167	0.040103	0.059734	1.21032	1.75065	0.863411	2.03731e-09	4.41899	up
EVM0002794	40	151	60	619	1834	1990	0.588806	2.10639	0.72902	8.53347	24.9522	22.5972	0.000141769	4.122	up
EVM0002830	331	276	331	907	713	951	4.58662	3.90175	4.18079	11.5664	9.22272	9.41412	1.09687e-05	1.44562	up
EVM0002898	6464	5644	4258	1681	2725	242	101.532	85.9671	60.9643	25.7145	42.0057	3.02287	0.002945	-1.76603	down
EVM0002903	27	57	27	376	1358	2194	0.402351	0.832274	0.331767	5.1896	19.304	24.874	0.00120108	5.0955	up
EVM0003070	32	147	91	926	2721	2910	0.452562	2.00518	1.17682	13.061	38.3252	33.3764	2.67135e-05	4.5945	up
EVM0003108	31	375	92	3806	6926	8998	1.07187	12.6238	2.89835	128.752	236.087	248.488	2.02964e-12	5.27401	up
EVM0003214	2577	2473	1803	386	623	322	31.9912	31.1012	19.6545	3.83995	7.46721	3.2383	1.75214e-08	-2.35244	down
EVM0003272	1035	1020	1120	489	409	529	11.1747	10.6834	11.0101	5.13858	4.28704	4.54027	0.000177259	-1.16151	down
EVM0003283	223	199	234	718	551	572	3.0589	2.66563	2.98102	9.69887	7.45637	6.29809	0.000114837	1.49228	up
EVM0003333	1038	1417	1251	4453	2908	3809	27.6058	35.5992	29.2084	115.898	74.9315	91.1298	2.44212e-07	1.58657	up
EVM0003365	820	535	372	0	0	0	22.6512	14.6905	9.37505	0	0	0	3.50158e-15	#NAME?	down
EVM0003416	1745	1682	2305	879	583	1392	20.9915	15.1376	22.6206	9.98412	6.58551	13.0477	0.000280258	-1.03191	down
EVM0003436	0	5	8	39	108	87	0	0.109741	0.148311	0.85314	2.43844	1.59819	0.000220558	4.22271	up
EVM0003557	0	11	0	102	135	87	0	0.378988	0	2.42034	3.34111	1.64847	1.50239e-10	4.85865	up
EVM0003591	5798	5976	3782	1814	2411	1050	214.925	214.824	127.794	65.4998	87.7114	30.9499	0.00343369	-1.5447	down
EVM0003625	58	73	49	1886	1031	1465	0.607062	0.736855	0.4684	19.2855	10.6161	12.2263	1.91818e-14	4.58915	up
EVM0003670	0	6	0	81	237	340	0	0.240539	0	3.2608	9.6403	11.1906	2.4206e-06	6.70866	up
EVM0003705	98	172	80	1040	1659	2476	2.69378	4.60758	2.0022	28.0923	45.1634	54.6016	2.44753e-08	3.84556	up
EVM0003725	34	0	59	136	172	197	0.890504	0	1.39651	4.63343	5.84461	5.34481	0.000106037	2.47351	up
EVM0003806	5	20	12	135	383	421	0.056285	0.263846	0.146634	1.826	5.24493	4.67684	1.91109e-05	4.6544	up
EVM0003849	197	164	164	58	24	33	3.46979	2.79389	2.62398	0.981901	0.40468	0.453014	0.00043293	-2.19657	down
EVM0003935	60	100	111	369	233	256	3.29434	4.88843	5.31454	2.63548	2.51081	5.43346	0.00215756	1.67794	up
EVM0004023	42	126	51	405	972	1325	1.23778	3.65558	1.38581	11.8603	28.7488	31.7438	0.000274313	3.58839	up
EVM0004051	269	269	276	2030	1519	1633	4.50015	3.93145	4.19555	29.9958	23.2211	21.6506	4.10439e-19	2.67055	up
EVM0004147	44	82	84	196	188	308	0.968745	1.63757	1.59483	4.62873	3.85297	5.72612	0.00360826	1.70927	up
EVM0004150	41	23	12	169	82	142	1.0765	0.268469	0.16433	2.51933	0.96024	1.82788	0.000438915	2.32464	up
EVM0004217	163	160	128	61	19	36	6.7372	6.41018	4.81642	2.45248	0.757632	1.16989	0.00309506	-1.97558	down
EVM0004220	0	39	12	406	1623	3397	0	3.27293	0.918808	34.6666	139.855	237.287	0.00140334	6.6749	up
EVM0004223	7	48	19	101	244	298	0.109362	0.732856	0.28005	1.59742	3.91969	3.92948	0.000849213	3.09508	up
EVM0004259	138	188	145	56	32	20	1.70578	2.25741	1.62667	0.670467	0.385014	0.191339	0.000988628	-2.10555	down
EVM0004260	447	487	616	227	175	167	6.65684	6.88627	7.70239	4.28413	3.32481	2.57664	0.000566536	-1.43119	down
EVM0004278	75	118	160	459	914	1366	1.0936	1.77326	2.14808	6.54107	13.0168	16.3413	0.000685801	2.94731	up
EVM0004365	641	377	543	125	252	134	7.95274	4.45135	5.18693	1.20225	3.01881	1.04583	0.00189527	-1.58999	down
EVM0004368	50	35	41	215	191	316	1.33672	0.904232	0.996641	5.67336	5.0703	6.80701	7.29733e-06	2.49156	up
EVM0004392	51	88	34	471	669	831	1.24645	2.11071	0.756413	11.3754	16.2823	16.3922	1.31159e-16	3.47564	up
EVM0004586	207	209	225	977	744	857	2.81288	2.73148	2.77699	13.1071	10.2766	9.42812	1.11603e-09	2.00669	up
EVM0004610	361	434	428	839	977	1202	7.04415	8.21543	7.61849	15.9668	18.7388	18.6759	2.97867e-05	1.29372	up
EVM0004611	0	0	10	38	219	275	0	0	0.18059	0.835214	4.97128	5.06872	0.00146512	5.81637	up
EVM0004747	0	26	0	108	198	224	0	0.485782	0	2.03273	3.7662	3.44909	5.95122e-10	4.29837	up
EVM0004768	56	96	57	495	701	863	1.37387	2.29168	1.28777	11.9538	17.0544	17.0133	3.34611e-16	3.27816	up
EVM0004804	7	2	8	95	96	75	0.101007	0.033499	0.107735	1.44066	1.43542	0.982672	1.06807e-07	3.99464	up
EVM0004840	253	381	301	1450	3229	3502	3.09591	3.35959	1.98329	13.4651	31.4193	28.3707	4.45774e-05	3.11612	up
EVM0004895	7724	7800	6274	3281	3661	1160	157.269	154.021	116.425	65.0852	73.1626	18.7786	0.000564466	-1.39633	down
EVM0004909	81	66	82	18	7	24	3.89026	2.25555	3.12274	0.543273	0.213245	0.716434	0.00329066	-2.26285	down
EVM0004970	341	264	309	2353	1543	1500	7.42642	5.58066	6.14291	50.0373	33.0616	26.0294	1.11666e-06	2.56616	up
EVM0004975	934	972	600	229	247	250	58.083	58.6379	34.0218	13.8759	15.0696	12.3289	0.00020545	-1.80471	down
EVM0005022	17	29	20	104	159	117	0.202297	0.326698	0.209138	1.2053	1.86437	1.11184	0.000184047	2.53224	up
EVM0005067	11	17	19	99	74	84	0.105046	0.155429	0.16543	0.936474	0.706232	0.644093	0.000852775	2.46132	up
EVM0005099	12	18	10	76	150	227	0.501973	0.735012	0.359908	3.10021	6.20522	7.62661	0.000138235	3.46006	up
EVM0005122	80	61	67	404	663	727	1.1862	0.886212	0.912884	5.89762	9.75475	8.6741	1.10351e-10	3.09411	up
EVM0005154	477	433	433	1076	626	1037	5.38015	4.62655	4.37681	11.2408	6.35054	8.59929	0.00471642	1.00989	up
EVM0005158	5	11	15	107	113	98	0.064971	0.128682	0.177928	1.35698	1.45505	1.01824	1.85644e-06	3.39061	up
EVM0005168	26	18	8	137	312	412	0.803785	0.379158	0.193739	2.62256	5.67955	6.73603	1.9119e-05	3.99425	up
EVM0005200	241	236	80	754	990	1235	3.17134	3.06894	0.95208	9.7262	13.0148	12.9709	2.96351e-12	2.37362	up
EVM0005220	0	8	4	152	222	246	0	0.114913	0.094002	2.26269	3.481	2.9295	2.09214e-16	5.69119	up
EVM0005238	186	488	266	8431	8540	8959	2.8504	7.27588	3.72686	126.437	129.039	109.667	1.98918e-81	4.77924	up
EVM0005256	520	571	493	1177	1021	1764	7.88402	8.39255	6.99969	17.8304	15.691	21.8832	7.77749e-06	1.29398	up
EVM0005288	260	306	247	2200	1473	1812	5.15273	6.00307	4.45058	43.6345	28.9067	29.5193	1.92341e-15	2.74531	up
EVM0005290	115	94	168	336	337	362	4.91109	3.89635	6.53895	13.9933	14.1199	12.299	0.00454285	1.46962	up
EVM0005308	6	13	18	143	629	486	0.034683	0.075182	0.096882	0.831236	3.68299	2.30448	0.00116697	5.11597	up
EVM0005394	5	13	12	116	86	46	0.088827	0.249114	0.254118	2.99361	1.97513	1.15718	0.00219494	3.08703	up
EVM0005489	104	68	36	509	576	798	4.38169	2.77374	1.38629	20.9874	23.9174	26.8408	1.78186e-15	3.13163	up
EVM0005522	0	13	8	245	964	1068	0	0.266067	0.176746	5.40388	22.5259	20.1524	4.42806e-06	6.75943	up
EVM0005555	90	160	190	413	434	501	1.38897	1.63774	3.85827	5.62003	6.20906	5.43603	0.000300263	1.62504	up
EVM0005569	12	19	17	101	92	119	0.235592	0.371924	0.304367	2.00422	1.83293	1.92292	0.00012619	2.694	up
EVM0005572	8	137	56	1609	4844	4925	0.125744	2.29839	0.891284	28.8003	86.0544	70.0375	5.52002e-07	5.81205	up
EVM0005575	339	337	217	55	76	44	6.70057	6.57143	3.88247	0.955038	1.42249	0.611391	4.83043e-06	-2.34632	down
EVM0005612	67	50	42	10	2	19	1.98678	1.43233	1.12207	0.262958	0.044507	0.446052	0.00270346	-2.43999	down
EVM0005623	2285	2726	2523	5669	8047	9681	36.9186	42.7121	37.1641	89.2496	127.664	124.425	3.64616e-07	1.62163	up
EVM0005631	205	297	226	99	104	46	5.23273	7.36644	5.25609	2.45842	2.58849	0.934768	0.00820191	-1.51992	down
EVM0005779	94	62	4	314	326	331	1.13132	0.840347	0.043588	3.70262	3.86831	3.18337	2.3623e-07	2.54751	up
EVM0005815	29	55	30	1579	1212	1455	0.397266	1.13489	0.366251	25.4379	18.239	15.5252	3.98694e-57	5.20536	up
EVM0005936	140	136	111	518	895	1062	1.88318	1.36578	1.59833	6.91523	11.8944	11.7107	6.51673e-07	2.6536	up
EVM0005993	238	181	174	501	624	604	4.6418	3.37044	3.11254	9.61781	12.0797	9.07115	9.93331e-05	1.53383	up
EVM0005997	104	55	59	17	3	10	2.38322	1.21013	1.23328	0.375788	0.045486	0.165392	0.0011994	-2.89162	down
EVM0006004	7	3	0	103	160	96	0.063689	0.026462	0	1.1191	1.7294	0.802725	1.67561e-09	5.12495	up
EVM0006009	295	376	471	116	115	149	1.89286	2.13291	2.67707	1.09689	1.08929	0.867427	0.00095438	-1.58706	down
EVM0006117	110	156	155	36	38	17	2.86868	3.95034	3.68923	0.912987	0.965889	0.345271	0.000876268	-2.17338	down
EVM0006146	265	209	201	48	116	60	2.65954	2.03092	1.83494	0.464416	1.13744	0.478629	0.00798482	-1.57627	down
EVM0006220	297	593	261	11590	8215	12892	5.97033	11.5627	4.77945	404.173	299.779	368.341	4.26522e-53	4.79802	up
EVM0006239	102	126	110	350	264	296	1.36287	1.62534	1.33214	4.55558	3.49744	3.14058	0.00897452	1.42598	up
EVM0006241	846	620	299	82	0	46	8.01977	5.69386	2.58347	0.750529	0	0.345533	0.000881164	-3.84152	down
EVM0006280	0	9	0	188	477	551	0	0.080865	0	1.8961	4.84131	4.53447	5.4492e-10	7.02294	up
EVM0006320	0	17	0	59	393	399	0	0.281971	0	1.08619	7.44036	6.13916	0.00192385	5.59244	up
EVM0006325	13	7	6	81	86	52	0.254049	0.133378	0.106805	1.56808	1.67086	0.816532	3.82059e-05	3.07349	up
EVM0006404	0	6	0	152	218	194	0	0.157922	0	4.02705	5.80389	4.18417	8.61035e-18	6.51796	up
EVM0006420	552	482	431	1166	896	1851	7.38631	6.25186	5.25883	15.2095	11.7785	19.7079	0.00210251	1.37791	up
EVM0006428	9	2	13	45	57	45	0.14	0.054999	0.182696	1.00271	1.3031	0.711534	0.000874554	2.65078	up
EVM0006446	1747	1342	1295	492	867	601	54.3601	38.9737	34.9664	12.5035	23.0555	13.1953	0.00495271	-1.15834	down
EVM0006581	155	181	100	13	37	7	5.35009	6.06547	3.14601	0.407715	1.22948	0.166593	1.00621e-05	-2.89611	down
EVM0006643	1914	2195	2178	8514	8251	10886	15.4085	17.1374	15.9862	66.7813	65.2154	69.7119	2.12641e-19	2.12573	up
EVM0006657	1018	1148	1115	3406	3048	2846	14.6601	16.0329	14.6259	47.7885	43.0856	32.5937	6.84835e-11	1.50784	up
EVM0006730	2	0	4	55	114	148	0.058751	0	0.080861	1.56265	3.27671	3.44654	1.00286e-08	5.74973	up
EVM0006832	5	7	4	227	154	187	0.113787	0.138958	0.076359	5.23032	3.56169	3.5195	4.17661e-14	5.13377	up
EVM0006839	5	12	6	272	135	238	0.170181	0.453847	0.193114	11.1824	5.58098	7.98024	2.52985e-12	4.78714	up
EVM0006851	195	116	148	14	21	19	2.31291	1.75989	1.78938	0.151503	0.225279	0.161657	1.57519e-06	-3.09261	down
EVM0006894	5	125	29	1777	3187	3455	0.064985	1.94865	0.418474	28.0253	50.6392	44.4854	6.53181e-18	5.70285	up
EVM0006920	2773	3309	3057	6581	10415	13216	57.4478	66.4947	57.7165	132.845	211.898	217.808	0.000128136	1.70769	up
EVM0006953	46	75	32	484	1958	2695	0.709042	1.11495	0.448154	7.25622	29.6267	33.0483	0.000804499	5.02137	up
EVM0007017	0	0	6	98	144	166	0	0	0.167141	3.1421	4.6662	4.34956	2.85364e-14	6.18566	up
EVM0007114	5	14	4	51	41	49	0.071208	0.234324	0.048677	0.885549	0.69491	0.677541	0.000900859	2.59027	up
EVM0007148	893	1145	1015	3412	4353	5086	7.68786	9.57409	7.99716	28.7962	36.6369	36.8968	2.06106e-18	2.06313	up
EVM0007151	521	425	464	4213	2504	3485	9.05704	7.0658	7.31947	70.7014	42.4854	49.2142	3.68866e-11	2.84483	up
EVM0007170	172	320	272	569	559	576	4.54589	8.21584	6.55446	14.6579	14.5287	12.1269	0.00577777	1.16159	up
EVM0007231	21	149	15	1550	1775	2355	0.511524	3.62476	0.338177	37.8824	43.7057	46.9958	6.74045e-59	4.89449	up
EVM0007279	14	23	22	93	121	132	0.734303	1.13812	1.03938	4.81687	6.25838	5.59903	0.000220988	2.55232	up
EVM0007299	481	960	682	305	97	107	11.5988	22.4596	14.9857	7.15916	2.27445	2.04221	0.00376011	-2.0484	down
EVM0007306	248	209	329	5003	1969	2342	4.17345	3.41633	5.04739	82.2749	32.6217	31.4427	0.00447946	3.58441	up
EVM0007314	258	257	317	883	503	682	4.0205	3.8667	4.48957	13.3695	7.67346	8.44678	0.00261863	1.31459	up
EVM0007330	6	2	1	242	245	274	0.186722	0.030691	0.028653	7.40136	7.55922	6.84307	1.29639e-20	6.35334	up
EVM0007341	4445	6338	4796	23121	25810	32267	55.8467	76.5831	54.8948	282.188	312.759	318.093	2.99018e-14	2.36639	up
EVM0007363	7	3	3	119	227	249	0.119818	0.038731	0.036403	2.28254	4.41542	3.91859	8.93835e-13	5.48255	up
EVM0007376	0	0	0	269	38	104	0	0	0	6.19233	0.863445	1.94714	0.00243764	Inf	up
EVM0007390	177	216	165	999	1488	2324	2.79491	3.30976	2.37368	15.4396	23.1608	29.323	1.40092e-06	3.07432	up
EVM0007419	57	33	85	225	182	187	0.806352	0.437831	1.33729	3.89272	3.21456	2.9051	0.00454285	1.78566	up
EVM0007425	10	13	19	590	260	247	0.120456	0.151817	0.212589	7.13241	3.28746	2.49806	0.000359843	4.73821	up
EVM0007546	4	77	16	658	1317	1449	0.0578	1.09212	0.213062	9.39696	18.9608	16.9027	1.68315e-11	5.11325	up
EVM0007563	407	311	143	6763	3100	3423	5.9685	4.63333	1.91534	100.934	46.3643	39.9942	0.00015468	3.92462	up
EVM0007580	0	66	25	422	1083	1367	0	1.65522	0.593051	11.3949	28.6193	29.5774	2.7657e-06	4.95913	up
EVM0007622	320	400	208	10240	7792	10676	6.29866	7.62598	3.72645	196.436	150.603	167.163	4.66174e-84	4.92317	up
EVM0007716	155	54	56	0	1	0	0.691981	0.234769	0.228147	0	4.2e-05	0	0.00039721	-7.97824	down
EVM0007733	1461	1603	1328	666	697	818	24.8451	26.9025	21.0149	11.4443	12.0167	11.4986	0.000332521	-1.02365	down
EVM0007743	0	0	0	70	50	50	0	0	0	1.76118	1.23619	0.991278	8.96773e-13	Inf	up
EVM0007780	3	11	4	356	347	268	0.089747	0.445611	0.128154	15.4429	15.1446	9.49887	1.06572e-21	5.75282	up
EVM0007799	0	2	0	41	41	39	0	0.052879	0	1.43177	1.43321	1.11307	1.86324e-09	5.88278	up
EVM0007804	14	32	28	262	321	460	0.136804	0.305802	0.244965	2.52013	3.10826	3.60938	1.99663e-13	3.8066	up
EVM0007861	212	89	94	3	9	2	9.79334	3.98502	3.94802	0.104657	0.399261	0.070616	0.000658028	-4.78728	down
EVM0007862	2158	2410	2011	1231	980	1004	35.6147	40.9507	30.6219	20.0601	17.2074	13.6817	4.15196e-05	-1.03638	down
EVM0007872	35	38	59	167	189	222	0.469653	0.495524	0.719567	2.18079	2.4974	2.37509	0.000471537	2.1388	up
EVM0007932	50	145	0	1660	2496	3012	0.552951	1.81815	0	19.5268	27.3085	26.6509	2.35244e-24	5.13987	up
EVM0008008	461	445	372	148	196	175	20.4075	19.0699	14.9756	6.34659	8.48793	6.13659	0.00566786	-1.30596	down
EVM0008039	100	109	112	1070	531	970	1.1181	1.19603	1.155	11.7758	5.90831	8.76055	1.53044e-07	2.98733	up
EVM0008068	225	223	226	448	840	1088	7.25706	6.87958	6.19717	13.4511	25.6425	26.9541	0.00378374	1.79659	up
EVM0008089	250	302	299	151	59	71	11.4582	13.4188	12.5182	6.74643	2.63875	2.57128	0.00331527	-1.59034	down
EVM0008153	603	306	254	49	1	12	6.7317	3.30177	2.58361	0.521816	0.002491	0.098309	0.000572798	-4.25001	down
EVM0008158	9	29	14	441	463	509	0.06463	0.203274	0.092322	3.10481	3.2772	2.9286	3.4048e-22	4.75368	up
EVM0008181	544	546	419	3822	4542	5254	6.27044	4.73092	4.48701	32.0749	40.848	37.9345	7.08205e-44	3.15475	up
EVM0008187	3	2	2	107	165	83	0.034015	0.016493	0.015501	1.86169	4.14657	1.66837	8.14225e-08	5.67886	up
EVM0008227	68	0	36	2687	2161	3013	0.945291	0	0.457329	36.7741	29.794	33.6572	9.375e-99	6.21812	up
EVM0008257	107	130	101	0	0	0	5.12808	8.5842	6.46382	0	0	0	4.04486e-17	#NAME?	down
EVM0008310	118	100	83	10	12	10	2.67329	2.1882	1.71385	0.220938	0.267413	0.180593	4.84876e-06	-3.23863	down
EVM0008322	413	585	425	189	222	209	4.47743	6.42136	4.90094	1.98798	2.30385	1.76701	0.0081647	-1.20246	down
EVM0008357	0	0	0	35	92	81	0	0	0	1.48416	3.9252	2.81343	9.56841e-09	Inf	up
EVM0008379	10	36	21	157	370	494	0.096174	0.42944	0.221385	1.82355	4.49641	4.68064	6.36067e-05	3.90729	up
EVM0008499	0	0	0	88	175	133	0	0	0	3.6985	7.4754	4.60567	3.85544e-14	Inf	up
EVM0008529	474	496	603	1288	986	1411	16.1114	16.8217	19.2389	41.7104	29.3019	31.2184	2.53969e-05	1.22223	up
EVM0008543	90	128	112	540	709	996	1.36623	1.89973	1.56645	8.25364	10.9542	12.4047	1.47104e-11	2.7475	up
EVM0008597	8	2	0	38	113	115	0.093052	0.023764	0	0.455115	1.36761	1.12466	6.27061e-05	4.65977	up
EVM0008654	605	845	535	192	171	73	13.0444	17.6732	10.5005	4.0176	3.61146	1.23825	1.59078e-05	-2.16423	down
EVM0008658	196	147	244	46	26	54	2.31745	1.68525	2.62881	0.529695	0.291007	0.502882	0.000226971	-2.23425	down
EVM0008684	0	1	7	50	36	50	0	0.020826	0.292952	2.57855	1.88074	2.08607	6.78515e-07	4.16718	up
EVM0008690	47	38	15	153	326	378	0.898793	0.797272	0.212294	2.91641	6.07381	6.28285	4.91252e-05	3.05222	up
EVM0008750	235	320	344	439	696	754	2.36835	2.97719	3.04427	4.18638	6.52138	5.74634	0.00823529	1.07043	up
EVM0008752	6	13	0	50	182	194	0.076918	0.160743	0	0.631609	2.35216	2.03636	0.000710317	4.42403	up
EVM0008798	246	302	326	663	887	1095	3.65354	4.38629	4.45113	9.66452	13.2866	13.0072	9.349e-07	1.58994	up
EVM0008825	11	7	10	270	212	178	0.111148	0.048318	0.099245	2.96828	2.33568	1.59874	3.17467e-13	4.56938	up
EVM0008876	414	304	221	24	124	32	9.52617	6.78808	4.62668	0.516375	2.78665	0.583162	0.00197894	-2.35228	down
EVM0008896	9082	7089	4754	1476	2049	1720	51.5766	46.2953	27.9984	8.66445	12.2257	9.65583	0.00198503	-2.01106	down
EVM0008900	14	47	23	160	819	853	0.338769	1.11112	0.512123	3.80864	19.67	16.5913	0.00448858	4.42711	up
EVM0008912	0	0	3	52	107	72	0	0	0.026391	0.727732	1.5018	1.55907	2.83057e-08	6.38863	up
EVM0009037	0	1	0	60	89	93	0	0.008422	0	0.784108	1.16944	0.985043	1.46528e-13	7.87406	up
EVM0009061	3	0	0	94	168	147	0.030731	0	0	1.39219	2.51105	1.7749	4.73524e-16	7.02302	up
EVM0009070	2204	2537	2333	297	785	63	91.4055	102.028	88.1861	11.9947	31.9271	2.05017	1.31281e-16	-2.55875	down
EVM0009097	2	14	0	38	131	206	0.037571	0.262152	0	0.704487	2.50812	3.18443	0.00338898	4.47214	up
EVM0009169	3	5	0	77	149	141	0.02736	0.052888	0	1.01517	1.9764	1.51737	5.525e-12	5.46596	up
EVM0009276	735	651	639	295	355	259	6.3492	5.42919	5.0316	2.46626	2.98449	1.75849	0.00217785	-1.14823	down
EVM0009278	646	742	799	1370	1690	1515	3.54674	4.31994	4.35633	8.09122	9.46338	6.5472	0.000128504	1.07219	up
EVM0009309	51	125	61	521	1687	2561	1.1651	2.79463	1.27488	11.7187	38.287	47.0914	0.00189744	4.2883	up
EVM0009365	146	203	92	9	27	34	2.56265	3.55605	1.46182	0.140811	0.438502	0.461609	0.00138196	-2.69722	down
EVM0009399	0	0	0	78	120	247	0	0	0	1.66858	2.58877	4.31737	5.36134e-09	Inf	up
EVM0009499	66	59	48	344	842	982	0.531124	0.439319	0.32402	2.51317	6.56302	6.11045	6.10219e-05	3.6198	up
EVM0009509	121	98	61	2203	1280	1927	5.07538	3.97735	2.34968	90.6806	53.0724	64.7295	2.03347e-18	4.24089	up
EVM0009610	8	3	10	116	119	128	0.199421	0.06954	0.214953	3.06986	3.1673	2.76192	6.73205e-09	4.12584	up
EVM0009617	0	11	9	65	80	55	0	0.173262	0.133819	1.10076	1.36063	0.755406	1.21044e-05	3.36264	up
EVM0009661	0	2	0	40	53	75	0	0.077403	0	2.00204	2.65718	3.0782	7.98708e-11	6.33324	up
EVM0009682	341	357	564	64	76	104	2.27201	2.28885	3.43391	0.40258	0.4766	0.539648	1.7616e-07	-2.371	down
EVM0009695	1512	1268	1664	3057	2981	4496	21.2584	17.2934	21.3193	41.8749	41.1575	50.2836	8.47277e-08	1.23011	up
EVM0009729	3737	4356	2753	1629	1531	1100	72.986	82.389	49.1914	30.9021	29.9636	17.4013	0.00282847	-1.34669	down
EVM0009764	4	5	0	43	43	62	0.04355	0.13508	0	1.46851	0.923721	1.10158	6.79651e-07	3.97	up
EVM0009807	66	67	39	143	195	253	0.898439	0.885743	0.490606	1.91228	2.63964	2.7698	0.0041814	1.74609	up
EVM0009831	5	4	0	72	38	65	0.069739	0.050497	0	1.21183	0.644333	0.902805	1.26821e-07	4.21169	up
EVM0009918	206	254	263	853	799	860	4.62855	5.55437	5.40109	18.7353	17.682	15.4298	6.39234e-08	1.7989	up
EVM0009945	0	10	2	146	204	305	0	0.21862	0.04221	3.342	4.70388	5.71014	1.38907e-16	5.73131	up
EVM0010017	3109	3648	2359	1018	1454	365	73.8771	84.0608	51.0807	23.5539	33.909	6.88964	0.00182756	-1.64993	down
EVM0010118	541	523	610	199	201	228	7.36252	6.98496	7.37518	2.59533	2.71748	2.45639	0.000468635	-1.41687	down
EVM0010178	75	81	82	317	585	850	1.91212	2.06493	1.9082	8.28105	15.3227	18.2777	0.000150119	2.85469	up
EVM0010180	1181	896	783	25	3	37	51.8187	38.1542	31.3071	0.901956	0.100195	1.27609	6.54648e-21	-5.53254	down
EVM0010207	0	9	0	45	129	120	0	0.222914	0	1.13804	3.29002	2.47341	1.7025e-05	4.98558	up
EVM0010223	4634	4757	5979	0	304	2014	27.3425	27.2696	32.2189	0	1.75771	15.7128	2.99566e-15	-2.83069	down
EVM0010259	2839	3033	2934	9013	8931	16315	58.2393	65.6566	54.8546	180.145	179.867	266.205	1.15749e-05	1.92937	up
EVM0010270	6	20	8	54	55	71	0.36774	1.30603	0.465781	3.63337	3.69305	3.85779	0.00195314	2.3816	up
EVM0010439	1	0	18	143	149	228	0.004954	0	0.41307	3.52311	3.7052	4.59762	2.35152e-12	4.85273	up
EVM0010472	10	17	19	582	418	662	0.860304	1.24548	1.29235	49.951	36.0154	44.4929	1.60807e-27	5.17245	up
EVM0010481	11	5	25	285	492	396	0.225944	0.079698	0.473949	5.84193	10.195	6.64	2.24661e-13	4.88473	up
EVM0010482	2	5	8	119	116	85	0.036341	0.097801	0.153111	2.51893	2.46231	1.453	2.44641e-09	4.46287	up
EVM0010491	2382	2261	1865	1033	958	1128	63.4425	58.399	45.2757	26.7904	25.0331	23.8931	2.42753e-05	-1.07672	down
EVM0010538	30	53	18	1180	733	647	0.540451	0.910354	0.286271	20.7207	12.9626	9.27396	2.68582e-09	4.65208	up
EVM0010553	575	560	463	988	1007	1378	27.6463	26.0705	20.2782	46.229	47.5155	52.6588	0.000451484	1.05414	up
EVM0010638	2	1	1	48	45	60	0.194136	0.062478	0.114701	5.9676	5.59015	6.02989	3.88094e-09	5.22625	up
EVM0010699	304	364	311	702	1257	1820	7.95509	9.22747	7.40667	17.886	32.2691	37.8687	0.00454285	1.92015	up
EVM0010723	2669	2645	2496	478	1245	1886	94.2575	90.085	80.8319	16.2999	41.7564	52.2099	0.004129	-1.14924	down
EVM0010762	12	41	22	311	250	751	0.182498	0.652493	0.322123	4.98838	4.0475	9.85949	0.000626417	4.07577	up
EVM0010776	31	55	40	2963	2110	2358	1.07835	1.86485	1.27838	101.42	72.7513	65.883	4.58436e-44	5.88075	up
EVM0010853	31	14	8	648	371	319	0.989404	0.42378	0.234482	20.714	11.9351	8.30615	7.39645e-07	4.6354	up
EVM0010857	1632	1418	1883	2832	3678	4061	32.0441	27.1346	33.494	54.3457	71.0489	63.7283	3.40494e-06	1.09765	up
EVM0010879	50	68	34	13	7	9	2.16179	2.85349	1.33197	0.528639	0.293982	0.286446	0.0024328	-2.40894	down
EVM0010944	951	1214	1080	405	532	573	13.4315	16.6345	13.9004	5.56609	7.37671	6.43745	0.000327061	-1.11037	down
EVM0010951	124	269	153	1384	5557	6730	0.871297	1.85083	1.0126	9.59363	41.4531	38.1108	0.00095438	4.61796	up
EVM0010952	5	0	2	311	120	111	0.147001	0	0.047071	9.12021	3.53332	2.66115	0.000349856	6.26938	up
EVM0010980	1640	2357	1052	266	255	167	27.6879	39.351	14.1205	4.2188	3.81357	1.90231	0.000562671	-2.87648	down
EVM0010988	11	8	7	257	164	199	0.218247	0.157866	0.135224	5.50223	3.72543	3.45914	7.76797e-13	4.55999	up
EVM0010993	1882	2504	2882	642	1053	684	37.0945	47.8823	51.7958	12.326	20.3659	10.7174	9.21528e-09	-1.58588	down
EVM0011041	0	0	3	107	196	225	0	0	0.023876	1.31965	2.46595	2.29912	8.77079e-17	7.55551	up
EVM0011042	0	3	12	36	74	75	0	0.049371	0.254129	0.845423	1.71289	1.41602	4.22307e-06	3.69527	up
EVM0011071	893	889	919	3746	2633	3268	23.6405	22.8276	22.1689	96.6145	68.4418	68.8089	4.15501e-13	1.83149	up
EVM0011089	13	12	4	112	209	252	0.082257	0.073151	0.024538	0.746175	1.4004	1.37219	2.18441e-09	4.25547	up
EVM0011092	6	3	0	45	32	42	0.151336	0.058704	0	1.30841	0.917274	0.991347	4.73751e-06	3.6586	up
EVM0011095	659	638	738	1127	1838	2373	7.37855	6.93166	7.53734	12.3139	20.2707	21.1544	0.00364703	1.37612	up
EVM0011137	0	0	0	100	124	116	0	0	0	4.54481	5.64002	4.28995	3.83519e-17	Inf	up
EVM0011204	602	559	783	1055	1713	2093	11.1156	10.0137	13.1802	18.9885	31.0747	30.7572	0.00309049	1.3163	up
EVM0011230	0	6	6	57	37	56	0	0.098584	0.083546	1.00243	0.655247	0.797122	4.42806e-06	3.66488	up
EVM0011254	26	29	26	120	165	228	0.30036	0.335679	0.280076	1.38832	1.9249	2.16191	2.04263e-05	2.64037	up
EVM0011258	6	12	8	72	270	288	0.074542	0.170407	0.096205	1.29175	4.50703	3.9618	0.000602473	4.58209	up
EVM0011261	125	294	202	22	16	24	4.40458	10.0675	6.50885	0.745736	0.544977	0.659704	0.000108876	-3.33678	down
EVM0011272	0	9	0	63	137	139	0	0.138839	0	1.18814	2.64611	2.18401	7.27284e-09	5.18841	up
EVM0011338	452	302	437	110	57	85	7.12603	4.60869	6.27784	1.67868	0.876014	1.06201	1.23001e-06	-2.24633	down
EVM0011407	720	1036	832	5357	7871	8705	9.92477	13.8485	10.4546	71.9654	106.545	95.4625	2.86142e-16	3.07276	up
EVM0011414	2053	2292	2355	4635	6222	8398	39.0859	42.3361	40.856	86.0019	116.317	127.355	6.92084e-06	1.50681	up
EVM0011424	1509	1723	1636	697	767	906	17.1595	19.0055	16.9583	7.71424	8.55796	8.18731	0.000132904	-1.04761	down
EVM0011428	5453	6076	4599	1772	2594	2011	65.0251	70.2525	49.985	20.5829	30.356	19.0629	1.15749e-05	-1.33897	down
EVM0011503	6	0	5	164	115	172	0.05311	0	0.015085	2.32086	1.04045	1.40381	3.29666e-13	5.35367	up
EVM0011550	30	37	48	656	474	629	0.377053	0.456702	0.558365	8.17125	5.94695	6.39218	4.66044e-20	3.93987	up
EVM0011585	0	2	0	85	82	149	0	0.034684	0	1.4826	1.42107	2.11936	1.59033e-14	7.23654	up
EVM0011598	51	61	53	134	190	244	0.791739	0.918139	0.753994	2.05014	2.93157	3.04609	0.00471907	1.76469	up
EVM0011612	923	990	922	1778	3836	4207	14.587	15.1646	13.2799	27.3838	59.5339	52.8864	0.00861657	1.77782	up
EVM0011625	0	7	6	39	52	62	0	0.15666	0.1227	1.00145	1.33926	1.2978	6.62069e-06	3.57304	up
EVM0011636	396	374	375	651	1200	1248	3.94061	3.60577	3.72771	6.82321	11.716	12.2971	0.00484101	1.42566	up
EVM0011666	435	557	434	1065	1869	2701	9.10144	11.3106	8.26886	21.7293	38.4333	44.993	0.00301471	1.95255	up
EVM0011692	24	38	24	131	158	304	0.289805	0.437857	0.255588	1.54279	1.88049	2.93709	0.000138235	2.74264	up
EVM0011796	0	0	0	35	40	44	0	0	0	2.11338	2.44028	2.16888	2.43977e-11	Inf	up
EVM0011802	28	14	9	126	396	526	0.427439	0.204993	0.124888	1.89352	6.01448	6.48238	0.000544753	4.30447	up
EVM0011809	106	57	101	3	11	31	3.7208	1.63676	3.04345	0.02958	0.184256	0.57819	0.000440785	-2.61731	down
EVM0011943	1285	1371	869	47	218	5	29.2068	30.2264	17.9935	1.01979	4.86557	0.07282	6.68299e-11	-3.63815	down
EVM0011949	0	3	0	49	81	86	0	0.239554	0	5.70044	9.61958	8.21506	2.10389e-11	6.12322	up
EVM0011958	0	0	0	166	79	123	0	0	0	6.60621	3.53217	4.10054	6.93776e-15	Inf	up
EVM0011959	32	12	12	503	352	387	0.368756	0.132029	0.124495	5.65042	3.98146	3.54366	8.67739e-19	4.44583	up
EVM0011975	1435	948	787	185	407	38	29.5357	18.9019	14.7662	3.6855	8.20309	0.599271	0.00271649	-2.28212	down
EVM0012084	252	226	224	59	63	38	2.69976	2.35312	2.18469	0.611084	0.65573	0.319763	0.000160099	-2.11717	down
EVM0012121	9	21	20	177	190	224	0.128165	0.322333	0.288389	2.77145	2.94982	2.85939	6.05465e-09	3.56779	up
EVM0012190	175	142	197	46	45	66	2.43679	1.74936	2.69439	0.730461	0.795978	0.986142	0.00913713	-1.72339	down
EVM0012195	0	3	0	51	33	54	0	0.071814	0	1.47068	0.957104	1.26577	2.68582e-09	5.46892	up
EVM0012260	111	89	146	1006	759	622	0.622786	0.498195	0.777714	5.77472	4.41143	2.84999	8.89996e-08	2.80978	up
EVM0012271	65	121	85	3110	2160	2765	0.882804	1.59	1.04719	41.4817	29.0148	30.0219	8.62979e-46	4.88266	up
EVM0012275	42	10	25	165	125	97	2.22233	0.474483	1.18844	8.56554	6.53533	4.08192	0.000573506	2.33372	up
EVM0012290	163	311	193	2234	3021	3807	6.46517	11.9626	6.98097	86.5176	117.878	120.345	1.36109e-22	3.74434	up
EVM0012376	0	8	0	94	105	135	0	0.49051	0	6.00214	6.74432	7.02446	8.70947e-12	5.33189	up
EVM0012393	307	271	352	0	62	100	7.00068	5.66935	7.04006	0	1.34308	1.66878	8.02729e-07	-2.56199	down
EVM0012454	2103	1582	1461	53567	15581	26537	172.848	126.059	109.432	4289.43	1257.16	1734.57	0.00629599	4.20434	up
EVM0012460	743	632	782	249	152	158	17.2591	13.7668	15.5086	5.37794	3.11101	2.19123	3.81078e-08	-1.94086	down
EVM0012648	0	3	0	43	45	61	0	0.041104	0	0.728478	0.776343	0.847302	1.31656e-09	5.58066	up
EVM0012653	456	532	459	1863	2414	3180	9.80614	11.9673	9.57361	40.7411	53.3583	55.0632	4.33774e-13	2.34584	up
EVM0012680	0	11	0	72	296	320	0	0.220721	0	1.46468	6.05322	5.29964	7.3147e-05	5.91224	up
EVM0012703	0	7	10	43	106	101	0	0.188423	0.259408	1.24067	3.1209	2.39426	4.36528e-05	3.91902	up
EVM0012720	7	9	0	145	284	488	0.118075	0.180907	0	3.29908	6.6197	9.53418	8.95549e-07	5.75297	up
EVM0012749	16	26	22	190	571	613	0.331479	0.701819	0.36621	3.47871	13.0997	12.5063	7.71498e-05	4.41312	up
EVM0012755	358	333	226	1101	689	1056	16.4086	14.7882	9.44423	49.1698	30.993	38.5162	1.40473e-06	1.60587	up
EVM0012873	22	80	22	883	2321	2425	0.393936	1.43383	0.372507	16.0308	42.462	35.9374	8.48729e-08	5.47425	up
EVM0012879	4343	5058	4848	7038	8813	13525	129.389	146.159	131.658	204.285	257.777	320.499	0.00904163	1.02023	up
EVM0012893	52	55	52	2	20	4	2.31478	2.37841	2.12935	0.045765	0.871887	0.133742	0.000774747	-2.5558	down
EVM0012950	53	112	47	36478	33978	528	0.917373	1.98137	0.654822	779.822	732.04	9.04032	0.000852775	8.43677	up
EVM0013013	122	150	111	5500	3332	5006	3.53317	4.21021	2.90865	155.348	94.8198	115.411	5.60808e-29	5.15705	up
EVM0013046	2480	2576	3307	289	136	373	65.407	66.0383	79.4902	8.28829	3.49895	7.80406	1.72192e-43	-3.41488	down
EVM0013112	0	0	0	66	204	294	0	0	0	1.08321	3.55197	4.02992	5.39657e-08	Inf	up
EVM0013150	1070	1274	1265	2693	3881	4621	21.2929	24.5876	22.9484	54.5999	75.8343	73.7275	6.48601e-07	1.6228	up
EVM0013220	797	617	402	164	220	75	33.3406	25.0476	15.3383	6.66906	9.01409	2.46555	0.00689021	-1.96641	down
EVM0013255	78	136	87	2836	2791	3449	2.55001	4.42357	2.58022	92.1379	91.3259	92.8136	7.98835e-78	4.89919	up
EVM0013431	75	60	65	145	265	267	1.54349	1.20289	1.22456	2.93256	5.39352	4.40265	0.00292868	1.7488	up
EVM0013441	15	40	36	82	218	206	0.289223	0.747911	0.62576	1.54889	4.18465	3.19735	0.0077935	2.48214	up
EVM0013496	0	0	0	70	80	116	0	0	0	0.851611	0.989379	1.15988	2.8055e-15	Inf	up
EVM0013598	65	59	61	457	424	422	0.54598	0.474443	0.464162	3.90703	3.5667	2.81394	5.25595e-10	2.81503	up
EVM0013684	600	487	499	143	235	233	5.35907	4.21739	4.0589	1.24139	2.05722	1.64885	0.00094244	-1.38631	down
EVM0013686	67	36	46	335	295	190	0.31998	0.167917	0.200274	1.57787	1.39827	0.730247	5.16475e-05	2.47096	up
EVM0013705	114	141	164	427	1377	1338	1.75997	2.11783	2.31467	6.45091	20.9628	16.5081	0.00848693	2.90686	up
EVM0013740	0	0	0	75	91	102	0	0	0	1.54133	1.96719	2.101	2.46432e-15	Inf	up
EVM0013786	683	432	226	7	42	54	11.1435	6.95968	3.16109	0.108721	0.619037	0.788961	0.00353779	-3.7609	down
EVM0013836	98	47	10	405	291	358	1.78228	0.827814	0.15498	7.18444	5.19716	5.18005	1.71654e-08	2.71203	up
EVM0013857	344	349	367	1427	1893	2912	4.8138	4.74046	4.67902	20.5275	26.8976	32.4625	2.47478e-07	2.53138	up
EVM0013893	34	26	46	117	156	151	0.918682	0.669856	1.11502	3.09312	4.13818	3.24913	0.0031036	2.01215	up
EVM0013901	283	289	327	719	1139	1314	6.21993	6.09826	6.48112	15.2497	24.3637	22.8083	6.63083e-06	1.81053	up
EVM0013935	131	22	1	302	326	303	6.31566	1.0126	0.034418	14.2179	15.4575	11.6393	3.70275e-07	2.53505	up
EVM0013940	3391	3329	3883	6540	8060	8589	60.1975	56.7538	66.2175	117.609	135.272	136.16	7.15465e-06	1.1275	up
EVM0013946	0	0	972	2201	3103	3334	0	0	8.63575	20.8683	29.6982	25.8486	4.38917e-11	3.25389	up
EVM0014132	978	1163	1253	2757	2236	2334	15.7971	18.3995	16.5697	42.2169	37.001	31.6214	6.52002e-06	1.11628	up
EVM0014167	1636	1810	1667	9510	17711	23804	25.058	26.8852	23.2817	141.963	266.409	290.073	3.42528e-06	3.29501	up
EVM0014334	4092	3209	3105	1356	1663	1644	71.2011	54.1771	49.3034	22.968	28.5235	22.7262	0.000132925	-1.16797	down
EVM0014406	69	52	66	325	338	419	0.609065	0.440169	0.532714	2.80863	2.94787	2.96098	1.6972e-07	2.52239	up
EVM0014436	609	612	681	1504	1724	2315	8.19347	7.98819	8.36139	19.7324	22.7892	24.7958	1.29223e-09	1.52987	up
EVM0014509	699	818	888	2263	2637	3740	6.46034	7.53655	9.05138	28.1653	32.9918	38.6276	4.38917e-11	1.83123	up
EVM0014523	8	5	5	112	84	87	0.170641	0.094561	0.088875	2.63957	1.978	1.65891	7.64926e-08	3.96406	up
EVM0014543	10	4	4	96	181	200	0.109103	0.042307	0.03688	1.01137	1.94553	1.74322	6.58066e-11	4.69214	up
EVM0014557	64	0	116	351	382	479	1.53615	0	2.49441	7.65296	8.57793	8.53166	3.80183e-09	2.78308	up
EVM0014587	17	11	12	718	640	765	0.796976	0.488406	0.504809	33.8607	30.4151	29.4466	1.22511e-37	5.7143	up
EVM0014627	7	47	3	543	1067	1880	0.050342	0.386435	0.018354	4.61755	8.78239	12.8289	7.90477e-07	5.86388	up
EVM0014652	531	434	614	1672	918	1289	7.47976	5.92751	7.87596	22.9443	12.694	14.4318	0.00652592	1.29712	up
EVM0014707	3	0	0	62	62	72	0.04962	0	0	1.97126	1.81486	1.56084	6.96044e-11	5.95411	up
EVM0014716	193	323	511	863	804	769	3.59077	6.21638	8.56659	16.2545	14.8349	11.1407	0.000300263	1.2762	up
EVM0014839	52	224	77	679	2367	3052	1.25473	5.35833	1.65599	16.1823	57.2405	60.1987	0.00168712	4.0734	up
EVM0014844	2041	2621	2566	5775	12551	15078	32.8731	40.8639	37.6064	90.5005	198.18	192.863	0.00281348	2.19433	up
EVM0014863	0	14	4	101	90	202	0	0.661578	0.141069	4.0782	3.65336	6.43456	1.0455e-07	4.40326	up
EVM0014870	3	0	0	81	96	55	0.046348	0	0	1.76079	2.10455	0.983949	1.21837e-11	6.22607	up
EVM0014918	608	556	636	1387	1279	1161	19.3017	17.2759	18.3027	41.7949	39.4204	29.1277	0.000202374	1.09493	up
EVM0014939	830	868	988	1501	2284	3115	13.5361	13.7241	14.6832	23.8522	36.5752	40.4164	0.00276784	1.3451	up
EVM0014942	20	10	18	296	129	220	0.464845	0.213327	0.393629	6.95017	3.05776	4.24022	3.37206e-06	3.74013	up
EVM0015019	0	99	12	1046	2317	1615	0	0.769838	0.081242	8.21577	19.5754	10.5301	2.50523e-08	5.47415	up
EVM0015046	2471	2338	1752	732	815	970	27.2898	23.8209	16.3757	7.91736	9.56271	12.422	5.78393e-05	-1.40391	down
EVM0015049	423	408	403	831	906	1186	7.53934	7.05847	6.54354	14.269	15.862	16.828	9.28489e-05	1.22757	up
EVM0015139	312	390	486	1213	1028	1011	3.95683	4.51767	5.70325	13.9906	12.6788	9.70608	1.24601e-06	1.46748	up
EVM0015173	743	669	532	1388	1201	1759	28.2096	24.6412	18.423	51.3969	44.7962	53.1542	3.07457e-05	1.13389	up
EVM0015194	38	28	4	82	137	177	2.28175	0.671546	0.125778	2.32645	3.12589	3.37516	0.000192716	2.43439	up
EVM0015235	1882	1850	1368	573	939	125	124.875	119.065	82.7085	37.0063	61.1628	6.57874	0.00435173	-1.59229	down
EVM0015238	11151	11531	8900	2065	3386	1497	128.242	128.562	92.2069	23.3456	36.8446	13.7	2.94927e-10	-2.16354	down
EVM0015292	105	112	120	1090	624	571	1.4153	1.44019	1.07473	14.679	10.2314	7.53415	0.000420299	2.77439	up
EVM0015335	4	25	10	66	147	225	0.071653	0.458737	0.173197	1.60684	2.7939	4.26518	0.00102512	3.4532	up
EVM0015423	4	5	5	101	84	200	0.066107	0.071669	0.061236	1.63456	1.36199	2.64817	8.53119e-08	4.74493	up
EVM0015477	36	203	55	1165	3500	3997	1.22255	6.94632	1.77194	40.0971	121.35	111.564	2.05967e-05	4.84782	up
EVM0015524	40	92	69	17	8	0	0.880302	1.95395	1.37484	0.353213	0.170378	0	0.000376915	-2.94752	down
EVM0015553	28	44	33	234	367	456	0.293473	0.450772	0.320743	2.51253	3.99457	3.95826	5.65073e-11	3.31365	up
EVM0015578	3963	3926	4729	7269	9134	11503	48.7445	46.9677	53.1976	86.9278	110.594	112.851	1.04449e-05	1.13647	up
EVM0015587	35	16	38	148	229	281	0.795443	0.350915	0.789962	3.27439	5.11612	5.08808	6.81588e-07	2.88147	up
EVM0015626	0	0	0	72	95	99	0	0	0	2.1009	3.38008	2.71795	2.75656e-15	Inf	up
EVM0015643	2	14	4	387	820	961	0.019478	0.132177	0.034628	3.85694	8.25437	7.83127	3.10486e-13	6.73119	up
EVM0015664	410	350	220	2	21	0	9.17793	7.07057	4.11438	0.030629	0.32583	0	7.34131e-12	-5.33985	down
EVM0015785	1	1	7	47	47	58	0.027714	0.024925	0.155014	1.26724	1.27471	1.26952	5.31803e-07	4.13976	up
EVM0015795	1053	924	1135	440	433	611	21.8056	16.6611	19.091	7.85669	7.82599	8.9291	0.00068168	-1.0815	down
EVM0015942	6	0	3	316	107	83	0.08728	0	0.040001	4.58757	1.53778	0.991575	0.00931583	5.82219	up
EVM0015943	53	33	22	111	161	125	0.606748	0.347177	0.20758	1.31702	1.94739	1.05448	0.00715625	1.86138	up
EVM0016077	64	52	79	319	330	411	0.975274	0.763964	1.09381	4.6293	4.9358	4.97869	5.45031e-07	2.44101	up
EVM0016143	7	273	54	4345	5534	9237	0.271118	10.3733	1.90071	166.315	213.459	288.652	3.50623e-17	5.79379	up
EVM0016159	3502	3705	3753	1437	1614	2184	54.2597	55.6628	52.9808	21.7072	24.5571	26.9755	6.14276e-06	-1.0816	down
EVM0016175	3256	3010	3223	1621	1320	1426	29.1693	24.0947	26.819	14.6215	10.8819	10.1068	1.99343e-06	-1.12114	down
EVM0016181	0	8	2	39	107	94	0	0.099577	0.020515	0.620131	1.96968	1.25679	4.14364e-05	4.57249	up
EVM0016203	619	592	684	1775	1240	1318	4.78775	4.75504	4.91974	13.6828	9.53784	8.02488	0.000273056	1.19801	up
EVM0016207	969	898	557	323	325	124	17.8324	15.6998	9.1119	5.64951	5.70418	1.72731	0.00805732	-1.63383	down
EVM0016217	573	736	1275	75	57	89	5.41	6.83313	11.0665	1.10912	0.503923	0.639066	3.28099e-07	-3.53889	down
EVM0016242	257	214	202	485	560	654	4.24261	3.3154	2.99292	8.19188	9.43433	9.14605	0.00104325	1.31936	up
EVM0016311	1009	984	842	294	405	121	48.8631	46.2044	37.1621	13.8301	19.2071	4.62553	3.39009e-07	-1.75488	down
EVM0016312	593	291	269	59	16	27	9.7686	4.16197	4.31871	0.83896	0.194524	0.401289	0.00224328	-3.51992	down
EVM0016338	54	27	51	1852	748	847	1.12813	0.549328	0.986119	38.3811	15.6166	14.3324	0.000295594	4.71806	up
EVM0016355	2370	2349	2093	615	1272	897	19.6962	18.9341	15.8527	4.97337	10.3767	5.92798	1.38985e-05	-1.28626	down
EVM0016431	16	9	1	183	100	114	0.390982	0.216325	0.011644	4.524	2.48209	2.30009	2.3623e-07	3.88334	up
EVM0016460	111	103	133	1129	749	775	1.92268	1.73405	2.09967	19.1839	12.8154	10.7431	8.96345e-10	2.94471	up
EVM0016527	97	164	113	332	344	349	1.95276	3.23733	2.07243	6.58806	6.96985	5.62405	0.00471907	1.45004	up
EVM0016616	5	61	36	232	1267	1411	0.048483	1.25368	0.604142	5.31976	34.5931	30.4902	0.00300299	4.82563	up
EVM0016736	16	19	29	166	152	186	0.597	0.684962	0.987217	6.19745	5.92783	5.67407	2.18266e-06	2.98783	up
EVM0016845	54	52	24	132	186	173	0.873632	0.69605	0.278556	1.90309	2.77886	2.25925	0.00321028	1.89192	up
EVM0016853	22	4	22	876	328	276	0.294949	0.039256	0.270564	11.5063	4.33954	2.95343	0.00639466	4.97701	up
EVM0016855	1792	1480	2257	0	450	504	25.7796	20.5926	29.347	0	7.06698	6.49749	1.14149e-12	-2.5495	down
EVM0016881	0	0	0	175	51	415	0	0	0	1.76773	0.515153	3.42682	0.000164087	Inf	up
EVM0016888	0	10	2	173	410	518	0	1.04432	0.195024	19.593	46.7897	47.8587	2.251e-09	6.48383	up
EVM0016908	174	104	153	12	69	17	2.3394	1.3575	1.87643	0.145172	1.6226	0.18099	0.0012315	-2.08598	down
EVM0016919	1590	1887	1251	442	405	311	30.9108	41.5834	19.5184	9.11894	8.08459	5.3914	6.13416e-07	-2.02864	down
EVM0016973	8	12	14	305	616	667	0.07611	0.119813	0.132537	3.38306	6.95218	6.08235	2.92931e-12	5.54749	up
EVM0017031	0	45	12	282	1206	1652	0	0.572016	0.143322	3.60957	15.5818	17.2825	0.000272443	5.74521	up
EVM0017039	40	50	46	183	279	249	0.49989	0.660274	0.580502	2.62345	4.07037	2.98237	2.22314e-05	2.38799	up
EVM0017048	5	44	16	322	1586	1829	0.071868	0.711972	0.388445	10.0558	48.158	40.8829	0.000263269	5.8187	up
EVM0017069	0	0	0	439	228	766	0	0	0	6.57804	3.44944	9.38923	1.64121e-12	Inf	up
EVM0017125	38	24	22	160	105	153	0.884385	0.549847	0.497335	3.87704	2.55041	2.80648	0.00050061	2.28873	up
EVM0017168	518	1502	550	39539	38907	47839	5.35308	15.1925	5.17321	399.092	396.079	394.906	1.17225e-49	5.59503	up
EVM0017275	9	0	0	75	172	154	0.338765	0	0	0.618169	2.19189	1.62946	1.68866e-08	5.40654	up
EVM0017283	438	332	248	8472	6209	9271	6.86617	5.04399	3.51023	129.17	95.1827	115.945	7.56495e-65	4.525	up
EVM0017306	2777	3533	2897	732	1550	1111	31.028	37.6031	32.5831	8.92913	18.4007	10.7859	6.0105e-06	-1.43389	down
EVM0017364	6	8	13	57	42	82	0.145471	0.157228	0.255266	1.33	1.00365	1.59426	0.000341027	2.74128	up
EVM0017375	460	497	486	1081	1202	1548	12.9943	13.6069	12.5088	29.7628	33.3454	34.7767	7.02572e-07	1.39488	up
EVM0017384	1156	1178	1444	2616	2167	3098	12.4749	14.8366	15.901	32.0618	30.2913	38.1099	1.5506e-05	1.05326	up
EVM0017482	45	43	40	170	200	312	0.86318	0.801398	0.701782	3.18404	3.77751	4.77966	2.5241e-05	2.38467	up
EVM0017532	606	469	493	346	142	131	19.7843	14.8303	14.6754	10.9872	4.52403	3.38313	0.00574395	-1.33263	down
EVM0017538	82	56	58	1085	673	592	1.32071	0.648362	0.807706	17.5126	10.659	7.71331	1.24181e-06	3.58527	up
EVM0017547	301	281	416	1224	1090	893	3.37803	3.03801	4.16133	13.2834	11.4192	8.12841	5.95337e-07	1.7058	up
EVM0017548	3	5	9	78	63	70	0.047934	0.092969	0.175049	1.78915	1.45504	1.316	1.84963e-06	3.66397	up
EVM0017572	5	0	0	70	62	48	0.195268	0	0	2.85938	2.52772	1.5982	2.38141e-09	5.1134	up
EVM0017660	8	78	6	615	659	798	0.099884	0.965032	0.069784	7.90871	8.52256	8.36371	2.69479e-27	4.45149	up
EVM0017667	0	13	11	82	129	53	0	0.293043	0.218025	1.70663	2.49777	0.988132	0.00246935	3.5197	up
EVM0017825	28	20	93	317	228	184	0.481673	0.130138	1.40484	4.28522	2.45531	3.69221	0.000238743	2.43368	up
EVM0017834	3	8	7	234	237	338	0.023893	0.075208	0.053341	2.91153	2.94815	3.43664	2.6655e-18	5.48488	up
EVM0017862	1431	1466	1347	370	164	150	40.9468	40.6313	35.8921	10.299	4.56252	3.4094	5.45594e-21	-2.62372	down
EVM0017889	33	18	18	159	101	334	0.571222	0.305183	0.285414	2.75655	1.76113	4.73268	0.00662617	3.03861	up
EVM0017908	79	67	76	533	300	396	0.8475	0.681536	0.716307	5.12518	2.91917	3.06861	1.3926e-06	2.46419	up
EVM0018044	24	63	21	630	811	832	0.11735	0.382894	0.116763	8.16239	9.14441	7.9226	1.45748e-28	4.37377	up
EVM0018070	3	5	9	58	52	52	0.028543	0.05536	0.103455	1.03489	0.814723	0.903305	2.86851e-05	3.28606	up
EVM0018101	40	33	47	183	226	255	0.694706	0.554428	0.752638	3.14436	3.91141	3.58081	1.86314e-05	2.46711	up
EVM0018106	28	22	12	155	238	455	0.519174	0.483558	0.295352	2.75378	4.38221	6.73748	0.000148263	3.70993	up
EVM0018148	306	234	196	43	97	28	7.36837	5.36	4.20796	0.87528	2.229	0.424859	0.000148219	-2.10053	down
EVM0018189	186	212	179	5129	2880	3233	1.52072	1.74099	1.37874	42.8224	24.1309	21.6355	1.1076e-09	4.28269	up
EVM0018287	141	181	165	25	81	35	1.06247	1.32091	1.13096	0.182984	0.597622	0.207861	0.00671881	-1.75696	down
EVM0018296	77	98	95	24	18	25	4.10338	5.11814	4.65258	1.24358	0.923431	1.05287	0.00748316	-2.01893	down
EVM0018308	312	302	320	91	116	120	7.74413	7.10378	7.17664	2.17129	2.62126	2.34147	0.00418976	-1.51839	down
EVM0018341	53	40	81	239	174	247	1.37615	1.2529	2.19626	6.60345	5.14515	5.37832	0.00110051	1.93056	up
EVM0018348	0	2	0	75	156	146	0	0.028705	0	1.19775	2.58922	1.99575	5.33083e-13	7.51618	up
EVM0018387	8	299	79	1537	6786	6195	0.090958	3.46441	0.855027	17.8924	79.604	58.8777	0.000417995	5.21605	up
EVM0018412	467	429	567	1043	865	1070	9.53322	8.72736	11.4342	17.4322	15.1446	15.2115	0.00167738	1.02515	up
EVM0018417	263	178	187	566	527	687	12.6213	8.29729	8.18998	26.5339	24.899	26.2839	0.00013021	1.48247	up
EVM0018449	14	11	19	143	315	269	0.116727	0.113854	0.162465	1.64397	3.77578	2.6288	9.90191e-07	4.06027	up
EVM0018462	151	146	148	26	39	46	2.72525	2.55661	2.43175	0.451894	0.690014	0.657897	0.0025099	-2.01753	down
EVM0018498	121	163	158	307	489	508	3.31751	3.94297	3.97982	6.99979	11.159	9.64159	0.000605566	1.55807	up
EVM0018544	16	30	2	91	292	186	0.301112	0.555605	0.034565	1.70565	5.53932	2.85137	0.00928795	3.53765	up
EVM0018595	1697	2063	1652	873	866	972	31.7594	37.339	27.6262	16.7732	16.2456	14.717	0.000174312	-1.00724	down
EVM0018742	1920	1770	2167	4087	4451	5422	13.3361	10.9559	13.8898	25.342	31.3735	28.5366	6.94414e-08	1.24686	up
EVM0018760	243	212	281	0	15	153	4.38261	3.62768	4.63942	0	0.26391	2.17356	0.00017443	-2.24551	down
EVM0018819	111	99	79	1289	592	646	1.85831	1.59988	1.2005	21.0573	9.74426	8.61159	0.00208372	3.12357	up
EVM0018832	118	141	215	388	418	621	1.31705	1.50874	1.21994	2.51294	2.77663	3.38967	0.000274313	1.58864	up
EVM0018927	80	85	74	3613	1286	1328	8.77983	9.06794	7.36161	389.322	139.58	116.796	0.00487679	4.71088	up
EVM0018967	0	2	0	51	85	113	0	0.07873	0	2.12021	3.56106	3.85592	6.5162e-13	6.90139	up
EVM0018971	6	10	11	186	181	164	0.153097	0.296256	0.281311	5.53745	5.42263	3.97433	5.15684e-11	4.3154	up
EVM0018976	689	699	735	1065	1520	2038	13.338	13.1236	12.9613	20.0773	28.8892	31.3718	0.00305485	1.10477	up
EVM0018993	4	6	3	160	142	160	0.134418	0.227507	0.082701	6.22837	5.56243	5.10144	7.82346e-13	5.13221	up
EVM0019111	204	535	562	1035	972	1092	4.9563	12.6366	12.4906	24.5783	23.2576	21.176	5.46233e-05	1.26629	up
EVM0019258	13	32	29	1064	439	322	0.375767	0.92666	0.771776	31.0362	12.8971	7.65157	0.00750475	4.65706	up
EVM0019383	0	0	0	118	59	147	0	0	0	3.00981	1.49918	3.05631	1.11713e-14	Inf	up
EVM0019389	2595	2246	2235	429	1299	656	41.4169	34.7568	32.5018	6.664	20.3442	8.32337	5.16475e-05	-1.55049	down
EVM0019396	571	536	583	1267	1187	1580	11.4484	10.422	10.6458	24.751	23.3595	25.1957	8.71177e-06	1.24284	up
EVM0019411	69	64	66	2	10	36	1.1725	1.06278	1.02535	0.022367	0.152852	0.485388	0.00931284	-2.13563	down
EVM0019483	890	994	734	15331	10361	13203	10.5936	11.4764	7.95764	177.862	121.11	125.037	1.69502e-28	3.87848	up
EVM0019501	2272	1697	1900	912	533	509	68.7076	50.2	52.9436	27.9	15.8348	12.3852	1.52371e-06	-1.58254	down
EVM0019511	3430	3178	2940	911	1491	748	37.8402	34.001	29.5611	9.78202	16.1476	6.56138	3.90917e-08	-1.58001	down
EVM0019660	12	56	24	1000	1283	2080	0.425072	2.00898	0.746251	39.1845	50.6425	67.0956	2.47691e-17	5.53478	up
EVM0019672	34	16	14	122	73	122	0.390993	0.173439	0.145955	1.38573	0.830685	1.12754	0.00115977	2.26877	up
EVM0019707	568	893	575	1797	3019	3390	11.7532	17.9314	10.8488	36.2607	61.4097	55.8584	2.28795e-05	1.99266	up
EVM0019715	359	479	355	86	183	145	7.16878	9.28573	6.47042	1.66246	3.58976	2.298	0.0011901	-1.52793	down
EVM0019719	572	417	362	159	215	144	14.2403	10.0557	8.20126	3.83678	5.24502	2.8457	0.00677963	-1.38158	down
EVM0019724	1416	1150	1109	386	593	112	19.5129	15.3707	13.9281	5.17462	8.01295	1.2272	0.000116243	-1.70691	down
EVM0019920	0	30	24	276	562	760	0	0.423368	0.323919	4.12873	8.51731	9.3684	4.78805e-08	4.88932	up
EVM0019952	228	190	191	692	515	673	6.06821	4.65689	4.39708	16.8496	13.9754	14.7272	1.86964e-05	1.61267	up
EVM0019966	9	19	27	201	301	336	0.078536	0.156879	0.213378	1.74705	2.63135	3.16301	2.50191e-12	3.94664	up
EVM0020004	0	9	0	40	50	93	0	0.120439	0	0.595678	0.749584	1.13854	7.03057e-07	4.27303	up
EVM0020096	10	8	0	165	212	341	0.225239	0.179481	0	3.99326	5.17251	6.75267	3.34843e-15	5.23558	up
EVM0020108	305	283	317	700	744	873	3.34677	3.01724	3.17742	7.4965	8.03484	7.64008	0.000103752	1.34908	up
EVM0020205	1906	1767	1789	535	1076	662	18.7367	16.4438	17.4017	4.88854	10.8567	5.44116	9.72512e-06	-1.25094	down
EVM0020262	477	539	432	4302	3188	3633	6.4976	7.1174	5.36165	57.1397	42.6725	39.3917	9.04716e-26	2.93332	up
EVM0020408	197	170	11	762	723	827	3.28568	2.75088	0.162809	12.6132	11.8413	14.1988	1.57611e-13	2.55696	up
EVM0020435	3	19	5	170	155	172	0.011609	0.106249	0.021233	0.955501	0.875883	0.851894	2.25696e-10	4.18306	up
EVM0020486	251	415	358	1403	3374	4377	4.91237	7.00554	6.76237	27.9558	60.2019	67.3122	0.00066532	3.14142	up
EVM0020496	30	15	29	598	337	629	0.757307	0.365718	0.648832	14.7709	8.3739	12.6679	1.10758e-16	4.38676	up
EVM0020557	3027	3273	3559	5582	10180	12400	40.8164	42.7695	43.7919	73.3226	134.769	132.93	0.00619743	1.50126	up
EVM0020637	96	49	61	5	4	2	1.58697	0.788656	0.935924	0.079312	0.060339	0.025029	2.28105e-06	-4.21006	down
EVM0020655	26	1275	256	7410	31781	35108	0.143114	7.08016	1.28189	41.5308	178.903	160.473	0.000141395	5.54324	up
EVM0020680	125	234	87	6025	4208	6380	1.66464	3.02962	1.05311	78.4113	55.1787	67.7737	5.01088e-59	5.18565	up
EVM0020723	3	0	0	55	158	151	0.021017	0	0	0.551549	1.61638	1.24598	1.43893e-07	6.84688	up
EVM0020783	53	33	45	9	12	6	1.18957	0.720331	0.918214	0.176923	0.249645	0.106867	0.00467722	-2.25432	down
EVM0020788	74	56	53	228	206	246	1.47525	1.09176	0.953552	4.4546	4.05793	4.08881	0.00115566	1.87704	up
EVM0020864	22	86	24	1642	2349	2817	0.23102	0.900444	0.237393	17.4625	25.1731	24.4483	2.91785e-34	5.6578	up
EVM0020885	0	9	0	100	169	150	0	0.145048	0	1.67421	2.87367	2.0609	2.8808e-13	5.50297	up
EVM0020895	360	322	341	1425	1516	1690	6.20444	5.7301	4.84345	23.2076	25.3696	22.4132	5.59277e-16	2.17088	up
EVM0020902	3828	3443	3088	1095	1195	1245	94.6164	82.6398	69.8721	26.5057	29.1028	24.4423	4.78886e-11	-1.56146	down
EVM0020910	333	446	261	138	157	67	11.7471	15.2487	8.3983	4.74103	5.42702	1.86793	0.00945716	-1.50341	down
EVM0020918	927	1092	793	1690	2756	4053	17.6388	19.9583	14.7284	31.0302	50.9413	66.5896	0.00931583	1.56175	up
EVM0021016	66	198	100	504	894	1118	1.1437	3.35781	1.5678	8.55479	15.2791	15.4924	6.62092e-06	2.76654	up
EVM0021077	64	51	41	1941	1946	2399	1.75901	1.28264	0.957712	51.7907	52.4429	52.4979	1.75565e-73	5.30887	up
EVM0021081	27	38	22	673	452	514	0.532988	0.688738	0.393382	8.16732	5.54774	5.73945	6.97816e-21	4.22315	up
EVM0021111	1803	1921	1679	746	788	844	19.5798	20.2236	16.4977	7.87714	8.39343	7.2035	4.6234e-06	-1.19234	down
EVM0021249	0	4	5	90	63	62	0	0.023704	0.034078	0.708306	0.494586	0.397405	1.20831e-08	4.62523	up
EVM0021257	7641	8818	6873	3880	3553	3441	59.2533	65.8169	45.5124	29.7093	27.2134	21.6657	1.18018e-05	-1.10559	down
EVM0021266	14	8	25	100	81	126	0.060576	0.03352	0.105412	0.786405	0.375783	0.794168	0.000128268	2.71839	up
EVM0021288	372	443	400	3685	2299	2995	3.79013	4.69524	3.98617	41.4954	25.6822	27.4715	8.98576e-13	2.87945	up
EVM0021351	200	135	166	746	972	1230	1.42468	0.90954	1.04897	5.05269	6.64241	6.80867	1.4599e-15	2.53857	up
EVM0021369	4420	5424	3923	2159	2405	1977	65.5889	78.0607	53.0581	31.2125	35.0337	23.3294	0.00077371	-1.07383	down
EVM0021378	238	1693	442	26766	41553	64450	8.06538	55.7066	13.651	884.935	1384.27	1739.39	1.69565e-13	5.76331	up
EVM0021387	1334	1088	1061	212	574	352	14.1331	10.6971	9.53189	2.5633	6.56353	3.64603	2.77426e-05	-1.60533	down
EVM0021439	20	8	0	374	246	297	0.458813	0.179059	0	8.52749	5.65997	5.53816	5.97913e-18	4.97066	up
EVM0021461	43	6	24	808	421	364	0.390606	0.048584	0.165457	7.90995	4.1928	2.83209	4.01806e-05	4.45114	up
EVM0021500	2476	2815	2985	7359	6719	9072	20.9491	21.7854	24.5112	58.6318	55.8034	61.0136	4.84804e-10	1.47484	up
EVM0021505	66	105	89	13	30	0	2.51667	3.39721	2.67291	0.397028	1.33882	0	0.000352191	-2.51433	down
EVM0021557	799	888	937	1702	2086	2722	9.08095	9.2837	9.62176	18.8412	23.1852	24.7265	1.14515e-07	1.29852	up
EVM0021631	773	735	571	14289	12167	14954	8.44703	7.78285	5.67953	152.214	130.6	130.056	1.037e-60	4.29774	up
EVM0021667	1296	772	977	307	374	294	10.1317	5.85312	6.96132	2.33923	2.86518	1.82625	0.000677969	-1.64011	down
EVM0021684	24	25	31	92	143	98	0.500514	0.511458	0.605346	1.92539	3.04115	1.68347	0.00405551	2.07814	up
EVM0021735	7	2	8	47	37	76	0.064426	0.039947	0.070672	0.737541	0.37954	0.757964	3.17881e-05	3.21924	up
EVM0021848	269	265	356	41	44	18	3.61496	3.37124	4.16326	0.528544	0.562395	0.157803	3.53547e-09	-3.06869	down
EVM0021904	147	285	119	11085	8196	9886	5.56657	10.5183	4.12212	411.694	306.719	299.721	1.24428e-76	5.70571	up
EVM0021959	384	1581	667	24331	27902	28000	4.07123	16.2998	6.45068	252.387	291.494	237.324	1.4545e-53	4.92139	up
EVM0021977	427	321	290	82	153	19	7.22376	5.26355	4.46157	1.3408	2.5362	0.243611	0.000372395	-1.98139	down
EVM0022038	36	29	55	216	140	123	0.298239	0.236473	0.416031	1.76231	1.15177	0.821522	0.00215518	2.02533	up
EVM0022072	18727	18573	12963	5833	7535	7703	338.266	325.331	213.411	102.63	133.604	110.646	0.00115566	-1.27145	down
EVM0022115	268	498	517	949	1365	1062	5.5657	11.7386	9.74216	19.1151	30.1082	19.9258	0.00106677	1.41651	up
EVM0022136	140	115	120	21	26	40	1.46349	1.16484	1.14893	0.22838	0.267731	0.331929	0.00221287	-2.13639	down
EVM0022151	35	10	16	958	917	977	0.529361	0.159722	0.200575	12.9798	12.0751	11.0843	6.28597e-46	5.52573	up
EVM0022172	7	19	7	358	185	251	0.136198	0.345184	0.125391	6.85164	3.56904	3.92961	3.36842e-10	4.57004	up
EVM0022210	194	234	236	415	623	841	4.95837	5.79509	5.59585	10.1846	14.5385	16.3758	0.000658028	1.48412	up
EVM0022305	5300	3795	3891	947	1490	1042	96.6313	67.1338	64.6555	16.901	26.8267	15.1588	2.17754e-06	-1.89656	down
EVM0022353	63	42	67	434	428	583	2.29902	1.47597	2.2165	15.5191	15.4133	17.004	3.80579e-12	3.06188	up
EVM0022370	675	437	464	149	203	177	15.4717	9.71588	9.68385	3.3164	4.56841	3.21029	0.00108591	-1.58159	down
EVM0022386	502	715	735	146	387	396	8.61654	11.5047	11.2827	2.49894	5.94859	5.43624	0.00994982	-1.07422	down
EVM0022403	0	14	10	709	981	913	0	0.109997	0.093437	8.63483	10.9794	7.217	7.4175e-50	6.78236	up
EVM0022422	258	394	323	169	57	63	3.10301	4.5964	3.54927	1.98438	0.666997	0.596538	0.000533395	-1.743	down
EVM0022436	49	84	91	166	258	332	0.431628	0.727127	0.756866	1.51488	2.3853	2.53368	0.00199828	1.75012	up
EVM0022438	116	349	152	8496	8844	12238	7.48584	21.9113	8.97728	537.353	563.594	631.843	1.33439e-99	5.55776	up
EVM0022448	398	410	460	1686	1019	1228	5.9796	6.56288	7.66547	27.9425	16.824	16.4169	0.000160132	1.6354	up
EVM0022449	443	2203	790	38256	50887	63421	5.02272	25.8522	8.2307	463.276	609.024	578.264	8.05968e-42	5.44867	up
EVM0022505	779	704	704	303	365	186	20.0497	17.5734	16.5162	7.58981	9.21105	3.80836	0.00013021	-1.33439	down
EVM0022572	3	8	0	85	308	590	0.079569	0.197646	0	2.1173	8.17909	12.5099	0.000781191	6.38705	up
EVM0022575	96	72	100	27	7	14	2.81717	2.05604	2.66895	0.752341	0.174939	0.327065	0.00062927	-2.48272	down
EVM0022577	2	6	2	32	113	126	0.045373	0.135352	0.041039	0.726358	2.58757	2.42549	0.000426307	4.72692	up
EVM0022678	5113	4252	4277	1965	2398	2045	80.3804	64.4509	60.9892	30.0857	37.0142	25.7663	3.84057e-06	-1.09034	down
EVM0022705	0	22	17	76	116	114	0	0.303068	0.21705	1.05432	1.95951	1.31856	2.51483e-05	2.99257	up
EVM0022737	243	522	287	9457	8611	10452	3.91143	8.15392	4.18919	146.879	134.773	132.496	2.71786e-79	4.74625	up
EVM0022798	333	382	260	120	153	66	5.20526	5.73908	3.6662	1.79817	2.35189	0.811078	0.00309049	-1.50389	down
EVM0022810	60	112	87	0	27	0	1.75873	3.56769	2.32235	0	0.779782	0	7.33012e-06	-3.16146	down
EVM0022855	0	0	2	54	59	89	0	0	0.151021	5.20448	5.7163	7.0277	9.92802e-12	6.74646	up
EVM0022947	123	121	175	318	309	441	4.65156	4.44013	5.95876	11.7607	11.6615	13.4864	0.00903577	1.34546	up
EVM0023010	5	7	3	204	167	200	0.153013	0.200525	0.080901	6.51999	5.37613	5.23215	1.91603e-14	5.2245	up
EVM0023106	20495	20857	16169	4803	6651	826	239.293	236.164	172.066	54.6231	76.2247	7.66057	6.89067e-08	-2.17893	down
EVM0023118	11051	10602	10347	5679	5453	3823	161.567	149.915	137.657	80.8909	78.297	44.51	4.95836e-05	-1.08516	down
EVM0023171	7	12	5	81	104	80	0.074416	0.117076	0.040287	0.850496	1.09638	0.68409	2.08768e-06	3.45634	up
EVM0023253	16	7	5	491	174	208	0.210678	0.077376	0.18576	13.0244	5.67742	6.11612	0.00136036	4.93913	up
EVM0023275	1598	1502	1617	624	633	827	11.0671	10.0898	10.209	4.21031	4.30129	4.55554	1.16353e-05	-1.19146	down
EVM0023321	5	0	20	58	106	121	0.042512	0	0.189728	0.787586	1.48939	1.11	1.22926e-06	3.56992	up
EVM0023330	4	7	7	91	194	116	0.046018	0.097981	0.091903	1.34296	2.89135	1.40027	2.43142e-05	4.50532	up
EVM0023346	457	438	672	152	179	166	4.30942	4.01698	5.80374	1.39464	1.63903	1.22114	5.99427e-05	-1.64108	down
EVM0023534	245	242	286	765	716	1022	4.67623	4.46798	4.95917	14.2123	13.4031	15.5056	3.76589e-07	1.68361	up
EVM0023567	34	49	43	11	1	1	0.569586	0.78825	0.648493	0.164185	0.008316	0.011921	3.66505e-05	-3.24824	down
EVM0023574	666	565	602	23898	9188	8137	41.3796	34.0561	34.1297	1448.54	561.12	402.601	0.0068843	4.50418	up
EVM0023631	59	56	93	359	161	312	0.985562	0.843964	1.56805	5.95634	3.36299	4.55152	0.00176157	2.00032	up
EVM0023656	1176	906	769	332	284	121	32.2357	24.0741	19.2172	8.84524	7.64556	2.6223	8.08389e-05	-1.93245	down
EVM0023697	27	44	35	1231	600	634	0.411696	0.674548	0.4379	17.7375	9.38661	8.09098	6.34869e-06	4.54731	up
EVM0023755	39	44	41	0	17	0	1.24543	1.35007	1.18318	0	0.488213	0	0.000287794	-2.76964	down
EVM0023775	217	246	289	521	1153	1455	3.90819	4.10475	4.34981	8.83097	17.8038	18.891	0.00869576	2.04407	up
EVM0023780	7	0	0	86	78	54	0.161225	0	0	2.37023	2.24804	1.22256	1.86324e-09	4.9084	up
EVM0023782	386	426	435	823	1201	1684	15.7001	16.7958	16.11	32.6494	47.9819	54.5187	0.000422956	1.55243	up
EVM0023795	80	63	51	322	371	388	0.965856	0.73634	0.555261	3.60042	4.23706	3.52061	2.9004e-07	2.46069	up
EVM0023846	66	342	150	3948	9255	9754	0.784961	3.94484	1.37022	47.3002	108.748	95.3304	3.45931e-09	5.34766	up
EVM0023877	6232	7745	4736	1688	2242	1056	182.258	219.63	126.231	48.0825	64.3252	24.5337	0.000152256	-1.89252	down
EVM0023888	231	227	234	536	887	1211	3.59356	3.41021	3.30055	8.14814	13.516	14.9996	0.000480844	1.90625	up
EVM0023933	13	4	11	95	136	188	0.319511	0.098337	0.243222	2.43262	3.52128	3.95845	9.92719e-09	3.88619	up
EVM0024023	9	31	38	838	1093	1202	0.153019	0.544523	0.614413	15.4345	20.4269	15.8421	5.92622e-47	5.34842	up
EVM0024024	21	116	33	703	2138	2996	1.42941	7.90018	2.08479	48.3149	148.001	168.043	8.20831e-05	5.05801	up
EVM0024081	13	13	5	370	307	330	0.435212	0.415129	0.145869	12.788	10.6967	9.31538	5.67737e-19	4.99224	up
EVM0024156	76	224	105	2466	4909	6384	1.44576	4.17185	1.83276	46.2786	92.8373	97.8076	1.08446e-09	5.05799	up
EVM0024167	0	16	5	102	463	495	0	0.33132	0.094665	2.1177	9.69933	8.41712	0.000244186	5.63692	up
EVM0024237	6	20	15	145	183	188	0.105209	0.330191	0.22966	2.57432	3.35378	2.76652	1.03325e-08	3.65915	up
EVM0024244	1122	1230	1267	3143	2015	2554	17.9509	19.0735	18.4734	48.9772	31.6452	32.4854	0.000639851	1.08901	up
EVM0024249	3093	2290	2513	1320	1030	1437	115.299	82.782	85.3564	47.9351	37.682	42.5876	0.000150119	-1.07734	down
EVM0024266	1831	1734	1549	640	578	524	33.8694	31.0907	26.1037	11.5314	10.4953	7.70619	1.57654e-09	-1.55462	down
EVM0024347	4710	4560	6623	1637	2016	2298	25.5026	25.8113	34.0936	12.4784	14.0504	12.5955	5.68673e-10	-1.41389	down
EVM0024397	31	26	41	183	120	105	0.296774	0.200769	0.300602	2.07139	1.43911	1.18812	0.00243764	2.07974	up
EVM0024417	964	683	729	213	292	183	22.4066	15.561	15.3139	4.61736	6.52592	3.18622	4.48121e-06	-1.77786	down
EVM0024441	11	5	10	61	60	43	0.307837	0.119411	0.268793	1.79498	1.77157	1.03079	0.000622315	2.67477	up
EVM0024498	643	506	568	92	207	63	13.9635	10.0233	10.3833	1.86457	4.03065	1.09615	1.19871e-08	-2.20615	down
EVM0024512	1413	1409	1054	576	613	454	53.4142	51.6387	36.3131	21.2004	22.7297	13.6227	0.000310586	-1.23689	down
EVM0024554	481	304	424	1739	7587	8059	7.60618	4.29118	5.50385	23.2368	101.582	98.1156	0.00635932	3.82964	up
EVM0024570	0	0	0	58	70	100	0	0	0	2.10128	2.88483	3.75895	2.73579e-14	Inf	up
EVM0024582	28	29	24	593	561	584	1.09848	1.12296	0.863433	23.8613	22.7447	19.1805	2.01362e-23	4.41526	up
EVM0024592	1098	588	581	53	121	63	15.8551	8.26164	7.67854	0.781476	1.70983	0.7092	0.000303541	-3.25164	down
EVM0024597	758	471	643	299	315	224	11.7183	7.30305	8.70157	4.55167	4.71406	2.59259	0.00582178	-1.14748	down
EVM0024601	103	106	85	2874	1319	1846	2.31185	2.30474	1.71268	63.3757	29.2771	33.2196	3.88999e-07	4.3494	up
EVM0024650	0	45	11	306	1629	1279	0	0.404907	0.079934	2.53539	17.0529	8.6567	0.000755077	5.8328	up
EVM0024693	29	8	35	273	269	240	0.21086	0.050999	0.233559	2.00418	1.99823	1.46206	7.06317e-10	3.4651	up
EVM0024715	204	202	211	674	779	1136	4.06433	3.90993	3.84034	13.12	15.2909	18.0542	3.9997e-10	2.04877	up
EVM0024725	1256	1310	1081	350	590	261	19.328	19.5795	14.9268	4.92284	8.59831	3.15728	1.73394e-06	-1.57927	down
EVM0024794	922	793	979	394	592	281	17.2166	14.2204	16.4692	6.99998	10.8152	4.22291	0.00104416	-1.05772	down
EVM0024810	46	98	44	1145	1498	2520	0.442722	0.908563	0.383387	10.894	14.3609	19.4609	4.81004e-12	4.73697	up
EVM0024857	16	21	12	289	403	155	0.251268	0.314887	0.172785	4.51543	6.55401	2.00732	0.000267388	4.13264	up
EVM0024931	6	273	35	1231	5163	6436	0.09252	4.2486	0.500841	19.3013	81.618	82.4233	0.000318134	5.30495	up
EVM0024975	28	86	36	448	1190	1524	0.69777	2.14098	0.828379	11.2045	30.0097	31.1406	4.28468e-05	4.36494	up
EVM0025120	12278	11189	10842	49942	37014	43052	235.724	201.991	183.945	908.302	691.968	638.47	8.26552e-07	1.91459	up
EVM0025121	3240	4051	3952	18735	24740	28141	28.6754	35.1649	31.9352	172.389	229.698	210.512	3.32063e-19	2.66463	up
EVM0025134	259	243	209	69	38	40	5.37812	5.4317	4.31754	3.03068	1.65421	1.44353	5.02421e-05	-2.27638	down
EVM0025276	252	365	250	1769	2146	2443	6.48713	8.94472	5.75743	43.693	53.456	49.481	1.50354e-29	2.85963	up
EVM0025283	0	0	2	108	106	165	0	0	0.029136	1.67877	1.65729	2.10021	4.83844e-16	7.65437	up
EVM0025324	1051	968	1363	449	745	451	15.2498	14.781	18.2212	6.69227	10.9873	5.77938	0.000892764	-1.01222	down
EVM0025376	6	3	3	142	184	245	0.182482	0.067543	0.063482	4.78454	6.23028	6.72355	2.32165e-15	5.53674	up
EVM0025387	134	502	209	11442	11975	15445	1.36345	4.89913	2.06959	112.557	118.625	123.92	5.50916e-91	5.50242	up
EVM0025408	56	585	167	9296	13038	17472	0.518488	5.26033	1.41187	84.104	118.861	129.045	5.23326e-27	5.59271	up
EVM0025436	279	709	483	1138	1035	1042	5.99106	12.0172	10.5218	15.0312	21.6592	10.6867	0.000764586	1.13142	up
EVM0025470	0	7	2	53	48	80	0	0.273554	0.045672	2.24326	2.06778	2.78264	8.89176e-08	4.2998	up
EVM0025523	40	47	47	1	0	0	1.59858	2.11253	1.72328	0.038673	0	0	1.0656e-10	-7.02911	down
EVM0025525	18	68	42	355	1318	1724	0.210437	0.804064	0.463848	4.52329	22.9038	23.0401	0.00070652	4.70765	up
EVM0025530	4	3	6	34	54	46	0.133928	0.079517	0.206769	1.33003	2.14075	1.47041	2.24351e-05	3.38677	up
EVM0025550	269	85	431	762	601	882	3.10176	0.66956	4.41659	8.82786	5.51347	11.7159	3.03967e-05	1.53122	up
EVM0025561	21	88	17	557	1330	2262	0.388975	1.63312	0.294067	10.4458	25.1472	34.6498	9.89263e-05	4.97917	up
EVM0025689	223	268	237	53	65	29	3.65325	4.26079	3.54263	0.843325	1.01598	0.362207	3.29146e-05	-2.27936	down
EVM0025703	482	576	483	70	218	101	7.04946	8.07373	6.27002	0.943006	3.06721	1.30553	1.39121e-06	-1.96199	down
EVM0025770	0	13	0	473	1042	1283	0	0.205796	0	10.3907	23.1181	21.677	9.69279e-14	7.6924	up
EVM0025777	19	11	27	186	327	336	0.534581	0.293731	0.687377	5.15713	9.1681	7.63887	2.06201e-11	3.90861	up
EVM0025817	204	207	130	64	34	4	6.60882	6.48687	3.83698	2.01552	1.06478	0.090361	8.21702e-05	-2.37341	down
EVM0025885	107	2069	617	11657	49318	43402	4.47908	83.9968	23.5236	475.421	2026.81	1445	0.000332521	5.2108	up
EVM0025991	11	0	0	168	72	156	0.155663	0	0	2.36758	1.01517	1.79335	3.11219e-09	5.08065	up
EVM0026010	0	2	0	32	36	50	0	0.022016	0	0.355439	0.401355	0.452976	2.16086e-09	5.82681	up
EVM0026017	2	6	3	95	101	110	0.058934	0.217294	0.0848	4.09829	4.41136	3.86539	3.9997e-10	4.78805	up
EVM0026021	139	108	90	380	246	344	3.15205	2.72104	1.8654	9.44576	6.21498	7.14289	0.00352158	1.50303	up
EVM0026028	0	19	9	320	484	574	0	0.769369	0.346338	13.3489	20.3524	19.5349	4.48604e-25	5.61543	up
EVM0026048	1334	732	242	2815	2277	3352	51.5603	27.443	8.50954	106.035	86.4229	103.089	3.20413e-07	1.81475	up
EVM0026074	94	131	97	607	1025	1160	2.00631	2.67989	1.98725	10.7347	18.1418	16.3162	1.71558e-09	3.09973	up
EVM0026101	6	0	7	92	113	111	0.131132	0	0.147793	2.10952	2.6249	2.08471	9.33439e-10	4.62644	up
EVM0026187	16	11	4	126	95	166	0.128886	0.083907	0.027325	1.00972	0.764234	1.08381	1.05256e-07	3.58356	up
EVM0026203	371	325	264	69	120	22	7.26256	6.16165	4.70538	1.30093	2.30466	0.328427	1.24334e-05	-2.14313	down
EVM0026212	133	114	93	366	294	312	1.93024	1.5946	1.22784	5.18497	4.18627	3.59782	0.00369965	1.50386	up
EVM0026220	11798	10329	8662	2694	4383	3245	86.9467	73.8208	58.1797	19.3425	31.7024	19.0171	6.28378e-06	-1.57766	down
EVM0026231	849	855	887	1338	1867	2395	21.7302	21.2015	20.6854	33.343	46.9114	48.7416	0.000642147	1.0959	up
EVM0026279	41	15	43	157	104	182	0.75454	0.268531	0.723072	2.87521	1.91957	2.71962	0.00107321	2.15267	up
EVM0026305	93	52	69	2060	888	1787	3.37996	1.8247	2.29257	73.3724	31.8429	51.9445	9.21528e-09	4.44435	up
EVM0026320	7	169	31	1709	5267	6559	0.403415	10.8699	1.84068	111.384	346.014	349.078	1.59162e-06	5.99033	up
EVM0026378	0	3	0	34	79	115	0	0.043481	0	0.734261	1.71209	2.02584	1.4889e-06	6.18084	up
EVM0026438	44	378	78	3693	9980	13599	0.583784	5.06514	0.949917	51.4182	140.676	154.503	1.23321e-06	5.72394	up
EVM0026587	883	581	367	4	33	4	23.7758	15.1564	9.00083	0.102485	0.852204	0.08567	5.93925e-07	-5.43566	down
EVM0026588	3876	6493	5922	2024	2141	2165	103.638	168.399	144.355	52.7102	56.1929	46.0448	0.000129025	-1.35882	down
EVM0026632	722	699	645	292	283	57	22.3522	21.0114	18.2061	8.8046	8.61141	1.38408	2.3692e-06	-1.66512	down
EVM0026706	1682	1630	2020	3597	3452	4540	56.2959	46.8137	53.4215	101.759	101.015	107.581	1.95978e-06	1.11349	up
EVM0026737	2169	1795	1622	483	1116	971	29.9912	24.0733	20.4395	6.50751	15.1536	10.6715	0.00884235	-1.13009	down
EVM0026793	3	7	6	99	164	202	0.021776	0.072783	0.058949	1.55136	1.79152	1.76061	4.9618e-12	4.85435	up
EVM0026892	475	501	621	19557	10157	12234	7.90519	8.09736	9.566	323.007	169.028	166.568	1.96686e-09	4.72419	up
EVM0026915	12	10	6	103	57	66	0.144947	0.115146	0.060124	1.30753	0.727733	0.687269	5.01788e-05	2.99326	up
EVM0026928	1544	1549	2162	516	1218	779	15.4423	15.0232	39.897	5.01875	11.9521	6.19313	0.00827449	-1.03894	down
EVM0026938	1660	1856	1866	3800	3351	4338	31.3617	41.0524	31.5197	66.7364	58.5037	77.2549	3.7259e-06	1.08513	up
EVM0026947	10	39	17	71	113	115	0.055241	0.207888	0.084783	0.387809	0.620238	0.631107	0.00267404	2.16734	up
EVM0027072	25	9	8	629	261	241	0.506974	0.178277	0.142043	12.5914	5.25951	3.92264	0.00126063	4.73503	up
EVM0027144	3	7	0	35	78	127	0.050958	0.156818	0	0.849737	1.92383	2.55166	0.000186199	4.5029	up
EVM0027186	72	84	109	32	0	0	1.47341	1.89468	2.19934	0.624111	0	0	2.43431e-05	-3.00323	down
EVM0027217	580	640	559	1572	1018	1276	7.49808	7.77865	6.1711	21.8367	13.8775	14.4412	0.000561225	1.11193	up
EVM0027231	239	236	210	731	549	658	8.06335	7.74637	6.47796	24.0957	18.2211	17.6892	6.70117e-05	1.49043	up
EVM0027284	1057	1029	946	36183	16819	21673	18.9965	17.9302	15.4925	633.736	296.818	309.856	3.82355e-07	4.61771	up
EVM0027288	403	448	490	930	994	844	5.14719	5.55523	5.70596	11.5813	12.4802	8.57671	0.00177463	1.05655	up
EVM0027328	1869	1365	1222	557	679	661	20.7107	13.9583	11.9081	6.59335	7.55801	6.54636	0.00581207	-1.2454	down
EVM0027337	5181	6088	4947	3291	2632	1833	275.923	315.12	240.153	172.972	139.078	78.3063	0.00062927	-1.05195	down
EVM0027364	4	19	9	81	96	116	0.09083	0.443277	0.20028	1.96607	2.41278	2.38152	7.48857e-06	3.18142	up
EVM0027407	0	5	0	129	118	84	0	0.045702	0	1.52961	3.14055	2.11676	4.43883e-13	6.02553	up
EVM0027421	899	788	703	281	352	426	15.0644	12.8218	10.7692	4.55288	5.78507	5.69594	0.000713727	-1.19445	down
EVM0027461	1165	1249	1159	390	471	696	27.9044	28.167	25.6195	9.20171	10.7855	12.7452	4.31354e-05	-1.22237	down
EVM0027467	26	46	22	1196	703	674	0.880314	1.52049	0.68886	40.3896	23.9109	18.5851	1.98631e-09	4.76916	up
EVM0027496	1281	1194	1105	438	509	455	15.9428	15.1004	13.1683	5.47585	6.85318	4.58315	2.71431e-06	-1.35454	down
EVM0027503	0	4	0	35	41	55	0	0.055206	0	0.484982	0.564697	0.616854	1.67995e-08	4.9788	up
EVM0027506	110	142	119	35	16	43	11.0191	13.8191	10.9098	3.38808	1.52273	3.42976	0.0046815	-2.01507	down
EVM0027528	1682	1523	1193	415	630	396	31.7627	27.5925	20.253	7.30202	11.4343	6.03789	3.15243e-05	-1.60461	down
EVM0027531	68	134	0	187	319	397	1.29591	2.49041	0	3.49787	6.01713	6.06384	0.00199362	2.09474	up
EVM0027551	275	256	310	656	609	697	2.15163	1.88835	2.34237	5.75219	5.10175	4.40431	0.00146512	1.22092	up
EVM0027569	3	0	0	72	89	83	0.020767	0	0	0.979407	1.5779	0.868429	4.07516e-12	6.27804	up
EVM0027580	3	3	5	110	94	85	0.043426	0.029926	0.056631	1.65283	1.41759	1.04278	9.56029e-10	4.73996	up
EVM0027604	4	11	21	112	126	134	0.046002	0.114189	0.214645	1.26839	1.44314	1.24616	8.12842e-07	3.40745	up
EVM0027710	995	2074	1702	322	0	0	5.87646	11.8791	9.16091	1.8481	0	0	8.47059e-08	-3.84847	down
EVM0027715	0	0	0	155	65	100	0	0	0	3.62173	1.64336	1.88815	1.82266e-10	Inf	up
EVM0027728	270	160	36	560	514	560	3.95292	2.16662	0.411675	7.36318	6.75472	6.03441	6.97406e-06	1.76193	up
EVM0027762	0	5	0	209	177	224	0	0.060927	0	3.59355	3.17873	3.15319	2.51447e-19	6.88369	up
EVM0027805	711	649	829	1881	1534	2118	10.801	9.56421	11.4819	27.8501	22.8909	25.5955	1.82166e-07	1.33113	up
EVM0027806	18	22	29	94	79	156	0.665504	0.811491	0.995564	3.54025	2.97605	4.78451	0.00146792	2.23641	up
EVM0027809	0	30	0	119	515	482	0	1.19854	0	4.02784	16.8013	13.2829	0.000448868	5.17048	up
EVM0027826	763	737	728	1320	2481	2835	10.6717	9.99738	9.2822	17.9582	33.9981	31.5647	0.00452738	1.55863	up
EVM0027855	5	2	6	41	45	54	0.127938	0.04818	0.147451	1.26406	1.37701	1.342	1.4987e-05	3.43479	up
EVM0027912	128	102	151	291	636	797	1.7091	1.3193	1.83184	3.78211	8.35135	8.47619	0.00487679	2.16581	up
EVM0027924	35	50	35	160	97	192	0.516652	0.721274	0.480406	2.34622	1.43472	2.3006	0.00471907	1.87359	up
EVM0027946	5	0	2	125	67	105	0.134518	0	0.049803	3.41601	1.85117	2.34272	2.38913e-11	5.37635	up
EVM0028007	194	278	202	8604	5335	7733	3.52351	4.90592	3.34066	231.943	95.3542	113.699	3.73662e-30	4.99244	up
EVM0028090	0	2	3	90	669	819	0	0.090306	0.151508	6.46807	48.4899	48.0511	5.73973e-05	8.32446	up
EVM0028132	39	61	94	378	488	516	0.420533	0.642464	0.94143	4.05018	5.27435	4.51424	1.82266e-10	2.85204	up
EVM0028198	3	6	0	40	73	101	0.031947	0.077039	0	0.613427	1.12758	1.2651	1.18425e-07	4.49957	up
EVM0028248	185	128	150	5728	2845	3909	2.05457	1.32572	1.47048	62.758	31.0026	34.7897	4.52316e-10	4.74448	up
EVM0028264	3896	3665	3378	923	1104	659	90.8941	82.9104	71.8361	20.9772	25.2627	12.214	1.30063e-18	-2.0113	down
EVM0028296	0	0	0	163	75	102	0	0	0	4.78729	2.18696	2.41485	1.27552e-11	Inf	up
EVM0028367	1086	1034	826	196	287	174	12.2713	11.3292	8.50927	2.1548	3.1742	1.56111	1.18709e-10	-2.15622	down
EVM0028409	507	714	668	137	375	131	5.40432	7.80817	6.18784	1.34449	3.85633	0.836684	0.000907935	-1.51264	down
EVM0028449	15	38	17	344	249	185	0.477008	1.23662	0.604854	11.4556	8.30669	4.91206	8.12705e-07	3.47927	up
EVM0028461	78	46	63	22	7	15	2.16208	1.24059	1.60535	0.573667	0.184351	0.32581	0.00839965	-2.10375	down
EVM0028477	51	65	57	18	10	13	3.00601	3.72524	3.06037	1.00478	0.551948	0.574136	0.00950631	-2.08081	down
EVM0028508	119	142	97	366	297	357	2.48315	2.87411	1.84589	7.43515	6.08466	5.92463	0.00315318	1.4947	up
EVM0028529	8	15	3	287	248	268	0.083908	0.16049	0.026988	3.15772	2.74938	2.40302	2.94324e-16	4.91559	up
EVM0028566	1485	888	708	143	216	175	33.1307	19.5936	14.638	3.09645	4.41939	2.8952	0.00407011	-2.5435	down
EVM0028594	2	0	3	123	115	124	0.021542	0	0.030481	1.34428	1.26682	1.10367	9.40697e-14	6.2109	up
EVM0028607	95	118	161	0	4	0	4.05314	4.52006	5.8904	0	0.122843	0	1.38221e-14	-6.4334	down
EVM0028615	249	201	208	59	78	67	4.11259	3.22975	3.15032	0.960451	1.27458	0.880981	0.00472696	-1.69054	down
EVM0028705	1715	2029	1571	654	516	649	20.7286	23.5283	17.2509	7.57152	6.02859	6.14887	1.29223e-09	-1.56059	down
EVM0028782	7	5	0	44	68	117	0.10334	0.085938	0	0.874454	1.34841	1.97271	4.05654e-06	4.16488	up
EVM0028800	3326	2747	2597	1273	1257	1154	175.256	140.36	124.723	65.3595	65.0108	48.3283	4.42806e-06	-1.23846	down
EVM0028815	18	25	27	85	121	127	0.220219	0.309572	0.316895	1.06787	1.58438	1.34078	0.00141531	2.2526	up
EVM0028836	3	0	0	53	245	456	0.033124	0	0	0.821562	3.88999	5.86758	0.000322906	7.85689	up
EVM0028886	2022	2140	2212	7165	7167	10080	32.9466	33.8254	32.8534	113.772	114.673	130.651	1.31159e-16	1.92219	up
EVM0028959	48	55	35	119	187	188	0.70103	0.772434	0.460773	1.68533	2.67843	2.18145	0.00505733	1.82161	up
EVM0029166	106	0	0	183	201	259	3.53094	0	0	5.96536	6.59422	6.87116	7.77508e-06	2.51874	up
EVM0029201	134	168	191	495	309	404	3.16141	2.2571	2.40828	7.51313	4.19341	4.52729	0.00838157	1.29615	up
EVM0029244	1723	1318	1480	184	331	74	36.316	25.7684	28.3685	3.4855	6.44749	1.23728	6.87687e-19	-2.89392	down
EVM0029289	17	48	17	178	459	568	0.448887	1.24804	0.400344	4.69708	12.2097	12.2472	0.00012692	3.84124	up
EVM0029299	811	790	174	3743	3549	4934	6.13975	5.79833	1.19744	27.6058	26.373	29.7028	1.57128e-34	2.73051	up
EVM0029396	944	908	691	396	199	424	33.2153	30.022	22.5264	13.3855	6.40019	11.6813	0.000451094	-1.35421	down
EVM0029424	1763	1432	1151	401	541	312	61.6714	48.5856	36.694	13.6692	18.5656	8.66763	8.57897e-05	-1.7856	down
EVM0029551	9	271	66	1244	4522	4000	0.053541	1.74583	0.396716	9.517	38.6916	24.1767	0.000236046	4.80238	up
EVM0029649	1639	1199	1137	554	560	200	18.7506	13.2162	11.888	6.11405	6.77516	2.17277	0.00140021	-1.57071	down
EVM0029663	326	425	379	140	124	182	5.24179	6.59828	5.45689	2.20611	1.94013	2.29082	0.00709873	-1.35732	down
EVM0029811	1773	2270	2267	5276	4748	5683	17.8082	22.1081	20.7518	51.6254	46.8126	45.3906	1.48922e-08	1.3129	up
EVM0029822	10	370	51	2280	11350	10831	0.057006	3.34059	0.289041	22.2156	116.275	86.6133	0.000247576	5.7942	up
EVM0029857	17	6	14	207	207	182	0.198429	0.063567	0.139542	2.58855	2.48155	1.7745	1.25754e-10	4.01674	up
EVM0029923	0	50	9	221	1417	1655	0	0.697033	0.105534	3.08654	20.0112	18.9303	0.00111918	5.76305	up
EVM0029949	675	692	763	1229	1831	2515	8.64318	8.11256	8.9089	14.6814	22.2285	24.4182	0.00164192	1.37033	up
EVM0029990	1069	1078	1087	4886	3671	4653	22.4117	21.8757	20.9081	93.9944	71.4794	74.6328	1.16538e-19	2.02256	up
EVM0030029	444	506	361	202	135	146	12.256	13.5505	9.0951	5.43037	3.63954	3.20833	0.0014972	-1.44855	down
EVM0030126	236	242	227	33	55	135	10.3197	10.2768	9.03845	1.40706	2.33031	4.6961	0.00462865	-1.7169	down
EVM0030182	36	25	37	239	136	164	0.541692	0.36327	0.513079	3.57012	2.03911	1.99493	6.52193e-05	2.46312	up
EVM0030192	293	319	334	2517	1441	1419	2.39336	2.46658	2.39334	20.1885	11.5502	9.32836	0.000358957	2.5168	up
EVM0030239	37	121	29	490	1833	2783	0.582192	1.86016	0.410885	9.3157	30.1472	36.2349	0.00184179	4.71353	up
EVM0030256	1380	1888	1672	469	539	508	9.18124	11.2513	9.01897	4.2477	5.07652	4.24932	5.5833e-11	-1.70185	down
EVM0030260	0	0	0	52	175	147	0	0	0	0.601005	2.24329	1.53723	9.58421e-08	Inf	up
EVM0030277	30	6	6	185	195	141	0.381652	0.065188	0.070317	2.33035	2.46326	1.43844	1.01663e-08	3.6061	up
EVM0030283	321	283	310	850	790	1159	26.3102	22.504	23.1694	68.0606	63.7232	75.7177	3.85505e-07	1.59635	up
EVM0030298	51	94	38	210	363	318	0.672569	1.49935	0.639577	3.24535	5.02229	4.16289	2.14663e-05	2.26693	up
EVM0030322	1587	1498	1338	4309	6609	8619	22.2039	20.3574	17.101	58.4554	90.2488	95.2747	2.85218e-06	2.11837	up
EVM0030468	867	1075	1330	2829	2826	3938	33.8223	40.1895	47.0766	107.945	107.887	124.619	1.37253e-11	1.54744	up
EVM0030517	7	3	4	286	91	150	0.086956	0.025063	0.040452	4.81243	2.45424	2.58951	0.000395466	5.21869	up
EVM0030573	41	67	91	177	176	288	0.570728	0.952512	1.22546	2.56055	2.5503	3.39597	0.00588693	1.68438	up
EVM0030630	44	17	8	93	140	140	0.615282	0.287347	0.100488	1.27398	1.92178	2.15499	0.000347736	2.38851	up
EVM0030670	0	0	0	34	45	48	0	0	0	1.81597	2.41788	2.07085	1.42075e-11	Inf	up
EVM0030691	536	597	531	172	75	30	9.95693	10.7314	9.06722	3.1255	1.36414	0.399864	1.63876e-10	-2.55558	down
EVM0030739	114	71	88	381	240	268	1.08025	0.650994	0.758787	3.52031	2.23281	2.02655	0.00135019	1.69908	up
EVM0030755	6	6	10	76	52	73	0.154722	0.114172	0.229215	1.26521	0.765541	1.24266	2.47163e-05	3.19979	up
EVM0030769	731	691	691	1084	1457	1788	9.97306	9.14267	8.58933	14.4076	19.5106	19.4067	0.000280234	1.01869	up
EVM0030827	1665	1115	1154	589	600	391	20.1679	13.0972	12.7584	6.94158	7.13193	3.76003	0.00648053	-1.30816	down
EVM0030830	11	40	9	104	705	934	0.22304	0.781748	0.165345	2.11784	14.4546	15.7229	0.00849389	4.80735	up
EVM0030846	816	784	652	340	327	297	18.8027	18.2823	13.3212	7.48546	2.88356	5.449	0.000551211	-1.22782	down
EVM0030948	21	0	9	63	33	47	0.655219	0	0.267643	2.01762	1.07444	1.23573	0.00513352	2.22948	up
EVM0030969	161	306	212	453	846	1013	2.86103	6.13042	3.57907	7.58078	14.2893	14.8668	0.00360056	1.75051	up
EVM0030977	0	5	7	119	46	59	0	0.11124	0.210615	3.82988	0.967658	1.3411	0.00134685	4.27195	up
EVM0030989	90	120	140	372	367	406	2.12232	2.75395	3.0257	8.59505	8.55113	7.66205	0.000344903	1.71625	up
EVM0031006	0	0	0	103	258	522	0	0	0	1.90396	5.51476	7.98996	5.76076e-07	Inf	up
EVM0031015	2850	2030	2261	356	1152	528	39.8877	28.959	28.2014	4.70602	15.6072	5.72266	0.000120209	-1.7882	down
EVM0031065	280	387	84	1496	1483	1567	4.6923	6.64271	1.26206	26.8148	25.588	21.6899	3.2109e-21	2.56126	up
EVM0031152	43	65	20	248	247	340	0.90732	1.42306	0.635219	8.2971	6.46395	8.11527	4.13374e-07	2.66377	up
EVM0031164	1291	759	823	300	73	17	21.602	13.8198	14.6011	4.81063	3.14272	0.191907	7.10621e-05	-2.85317	down
EVM0031177	19	33	14	390	576	624	0.312193	0.54775	0.215958	6.57432	9.77261	8.58826	5.71039e-23	4.56499	up
EVM0031188	895	815	839	202	354	398	12.8984	11.8771	10.973	2.77911	4.88504	4.51056	1.71866e-05	-1.43218	down
EVM0031191	45	77	56	191	258	325	0.687095	1.31073	0.838269	2.8316	4.30097	4.01562	0.000117511	2.10414	up
EVM0031212	403	382	431	628	926	1024	4.33787	3.98185	4.22303	6.58691	9.77995	8.76428	0.00162155	1.07673	up
EVM0031224	22	9	0	211	157	175	0.491435	0.191402	0	4.61566	3.45485	3.11607	1.4474e-10	4.06965	up
EVM0031228	0	26	3	131	941	1015	0	0.404558	0.030983	2.13345	15.587	13.6622	0.000914608	6.12696	up
EVM0031252	102	114	9	515	377	424	1.69392	1.90539	0.116556	7.51533	5.42187	4.96458	1.19234e-08	2.50038	up
EVM0031260	8642	8184	5945	2899	3213	666	196.016	180.004	122.887	64.0562	71.5299	12.0032	0.00068694	-1.71246	down
EVM0031330	0	0	0	43	37	53	0	0	0	0.941026	0.818104	0.951371	9.34317e-12	Inf	up
EVM0031389	2244	2942	2593	1166	1245	995	31.6014	40.3679	33.3679	16.0089	17.1377	10.9375	6.43232e-07	-1.18214	down
EVM0031399	436	604	386	21436	14875	23373	12.2623	16.1948	9.86555	583.621	385.048	497.067	3.75938e-57	5.36225	up
EVM0031423	0	20	0	173	803	719	0	0.397682	0	3.44455	16.1651	11.7224	6.59283e-05	6.36054	up
EVM0031472	4	2	1	128	103	177	0.436378	0.218255	0.114701	15.9312	12.8629	17.9469	8.62835e-14	5.80651	up
EVM0031486	0	7	0	42	124	132	0	0.145213	0	0.999403	3.02278	2.60081	1.0451e-05	5.36012	up
EVM0031500	2874	3453	3280	1595	1458	1641	42.1345	49.0952	43.8328	22.7724	21.0467	19.15	1.49859e-05	-1.03656	down
EVM0031562	0	77	8	262	1216	1376	0	1.8731	0.181962	6.44874	30.2918	27.7692	0.000883039	5.02484	up
EVM0031573	45	55	41	139	153	239	1.60988	1.93164	1.34956	4.91524	5.42047	6.89747	0.00268113	1.88289	up
EVM0031597	112	149	128	447	1001	1348	3.40962	4.39093	3.55181	13.2843	30.0079	32.7266	0.00113745	2.82103	up
EVM0031649	0	38	9	1645	3115	6951	0	0.322962	0.068042	19.3707	43.3579	84.4819	1.23259e-06	7.89985	up
EVM0031656	0	8	0	108	55	65	0	0.114378	0	1.53462	0.793094	0.756829	2.6048e-07	4.7967	up
EVM0031725	0	13	0	54	70	46	0	0.269874	0	1.20181	1.55385	0.828339	2.38414e-06	3.68651	up
EVM0031854	0	0	6	82	36	56	0	0	0.130918	1.9058	0.834587	1.06341	1.22926e-06	4.96108	up
EVM0031899	0	11	0	116	147	118	0	0.196755	0	3.04871	2.90808	1.88063	8.7704e-12	5.0834	up
EVM0031970	0	0	0	43	60	87	0	0	0	1.31568	1.86307	2.18722	2.65235e-13	Inf	up
EVM0031994	15	33	47	339	1028	1149	0.264845	0.592877	0.797814	6.19478	18.9758	17.1813	3.76106e-05	4.73868	up
EVM0032005	13	22	21	611	403	645	0.672011	1.04232	0.86399	25.394	17.1449	22.5365	1.27145e-25	4.88113	up
EVM0032089	113	123	94	338	275	358	1.85939	1.92638	1.39739	5.42087	4.43334	4.66241	0.00278587	1.53909	up
EVM0032131	0	204	62	3228	4358	5679	0	10.6097	3.02152	168.671	229.466	242.248	2.13591e-34	5.61818	up
EVM0032201	603	785	661	199	196	175	11.8592	14.9721	11.8575	3.81257	3.78601	2.7309	3.37931e-07	-1.84223	down
EVM0032241	322	334	243	665	738	912	5.76968	5.78772	3.95618	13.7515	12.9763	15.4706	9.29009e-05	1.34215	up
EVM0032273	691	1202	951	520	335	273	9.999	16.8634	12.5377	7.33184	4.75218	3.137	0.0083151	-1.3192	down
EVM0032367	0	0	0	611	147	143	0	0	0	12.4532	3.00611	2.36698	0.000937076	Inf	up
EVM0032458	0	0	0	190	72	106	0	0	0	5.28889	1.97312	2.47089	2.25142e-08	Inf	up
EVM0032489	0	7	0	87	295	354	0	0.361383	0	4.69269	16.1103	15.6355	2.48344e-06	6.65688	up
EVM0032530	0	2	10	39	75	42	0	0.015827	0.192678	0.818816	1.39118	0.86927	0.000420466	3.80492	up
EVM0032600	552	579	523	931	1229	1199	7.62264	7.82202	7.0243	13.2726	32.2963	15.6001	0.000993022	1.01648	up
EVM0032611	78	66	86	272	200	274	1.55785	1.26247	1.55359	5.30299	3.92872	4.35497	0.00308026	1.6918	up
EVM0032623	878	1141	865	2813	2901	3130	11.0992	13.9927	9.9727	34.6737	36.0347	31.4923	2.74129e-12	1.60761	up
EVM0032639	344	474	460	155	68	28	6.11376	8.17389	7.44799	2.68238	1.18305	0.394857	1.7271e-07	-2.30998	down
EVM0032647	925	1290	1588	632	684	435	16.357	22.0299	25.504	10.8439	11.8522	6.1577	0.00187901	-1.08686	down
EVM0032693	114	90	106	758	429	413	0.876041	0.647801	1.29208	5.62062	3.13886	2.46718	0.00134685	2.37521	up
EVM0032696	1061	846	946	407	506	385	12.9054	9.98433	10.5141	4.8017	6.01287	4.25288	0.000412334	-1.12885	down
EVM0032699	17	14	25	71	91	137	0.308417	0.248586	0.406885	1.26203	1.63481	2.00032	0.000744064	2.40923	up
EVM0032812	367	491	543	208	194	191	11.0284	14.3026	15.9811	6.09159	5.70576	4.55193	0.00636547	-1.22996	down
EVM0032817	1017	1175	947	163	598	531	16.0663	18.906	13.0597	2.50511	9.73194	7.17183	0.00263511	-1.2909	down
EVM0032919	151	143	213	604	362	425	2.71537	2.82968	3.48874	10.4548	6.2426	5.90784	0.00195821	1.46844	up
EVM0032948	8	24	22	92	99	104	0.144069	0.422221	0.359379	1.61786	1.76657	1.78343	0.00062675	2.46191	up
EVM0032971	0	0	2	36	108	182	0	0	0.019527	0.739343	2.24378	3.07326	4.15196e-05	7.41902	up
EVM0033004	5	5	0	49	190	420	0.07378	0.088721	0	0.867076	3.40871	6.1183	0.00672776	5.9324	up
EVM0033059	1862	1913	1003	291	617	115	106.327	105.871	47.5451	18.624	31.9378	4.69004	0.00304826	-2.18947	down
EVM0033101	2717	1943	2203	989	574	354	67.9223	47.1147	50.1983	24.1424	14.161	7.17358	4.60255e-06	-1.82189	down
EVM0033129	7	5	0	68	94	89	0.155717	0.094792	0	2.21501	2.4908	1.84759	1.4002e-08	4.32957	up
EVM0033153	3	17	12	252	455	556	0.018863	0.120593	0.075728	1.82438	3.31427	3.28309	3.27691e-13	5.29838	up
EVM0033167	24	20	30	1672	635	623	0.240414	0.187388	0.331552	18.9583	7.03844	5.854	0.000967105	5.32962	up
EVM0033228	2035	1623	1383	347	759	162	41.8071	32.3427	25.9009	6.93475	15.299	2.64309	0.000214914	-1.9511	down
EVM0033230	0	2	0	81	92	121	0	0.019623	0	0.957363	1.1018	1.17325	5.24428e-14	7.14648	up
EVM0033245	5	0	0	100	115	124	0.09495	0	0	1.8759	2.18207	1.91163	3.11465e-13	6.00938	up
EVM0033263	380	346	340	805	841	1325	5.71483	5.05185	4.66139	11.8118	12.431	15.8815	2.03696e-06	1.45187	up
EVM0033405	0	0	4	64	43	39	0	0	0.049887	1.01007	0.67874	0.496837	6.34121e-09	5.30812	up
EVM0033466	120	99	121	331	247	363	1.69981	1.36831	1.5989	4.58941	3.49422	4.16721	0.00619743	1.4563	up
EVM0033481	0	0	0	205	266	217	0	0	0	3.71057	4.86336	3.20709	1.44518e-25	Inf	up
EVM0033506	165	1097	329	16223	23823	39344	5.59712	36.0901	10.1647	536.335	793.626	1061.83	2.55806e-12	5.59838	up
EVM0033531	0	0	0	36	47	50	0	0	0	0.627467	0.873024	0.815267	9.55591e-12	Inf	up
EVM0033539	611	629	625	1624	1405	1548	5.02047	5.00416	4.67655	12.9965	11.328	10.5962	1.64408e-06	1.29185	up
EVM0033614	57	65	26	1225	1027	1186	1.2255	1.49066	0.534187	34.315	28.4328	27.9134	4.32494e-41	4.50821	up
EVM0033620	172	175	228	408	682	705	4.33136	4.25861	5.23792	10.0179	16.8722	14.1412	0.000109306	1.64424	up
EVM0033682	11821	9854	8108	4556	4845	4815	249.369	200.201	153.405	91.7155	100.359	84.4046	0.0032036	-1.07939	down
EVM0033689	170	236	201	71	80	36	2.46872	3.32457	2.66481	1.00655	1.13939	0.415988	0.00586004	-1.6684	down
EVM0033701	270	214	285	501	506	715	5.55827	4.26262	5.34662	10.0584	10.2212	11.714	0.00536972	1.14986	up
EVM0033726	84	62	44	148	170	309	1.31805	0.88604	0.609929	2.29782	2.7983	4.16232	0.00504135	1.67141	up
EVM0033752	0	0	0	62	59	73	0	0	0	1.01933	0.967353	0.981121	2.09843e-13	Inf	up
EVM0033785	329	369	293	1064	618	750	5.62282	6.12236	4.56635	17.7338	10.3748	10.2011	0.00851248	1.28759	up
EVM0033931	754	710	602	1627	1275	1888	12.1825	10.4574	8.03389	24.8592	19.2689	23.6508	6.52002e-06	1.18996	up
EVM0033946	3818	4067	3973	6620	7046	11120	101.08	104.472	95.8527	170.901	183.058	234.344	0.000344903	1.03981	up
EVM0034037	15	13	28	108	129	154	0.668951	0.238361	1.42316	3.33672	4.88405	2.73721	2.86643e-05	2.81813	up
EVM0034063	67	64	52	221	266	398	0.840462	0.804986	0.618969	2.70312	3.37696	4.07394	1.33474e-05	2.24219	up
EVM0034103	608	481	480	1124	1168	1228	11.2032	7.53473	6.96424	19.657	17.2793	16.9335	9.19977e-05	1.15609	up
EVM0034117	153	153	149	1512	991	1270	4.2034	4.08781	3.7395	40.7066	26.8845	27.9085	2.99544e-17	3.04434	up
EVM0034130	954	1015	975	325	342	341	12.6291	13.0366	11.769	4.18504	4.44581	3.59097	5.57532e-07	-1.54798	down
EVM0034146	53	61	64	218	196	288	1.41485	1.33544	1.34011	4.73287	4.38734	5.07432	0.000568041	1.96638	up
EVM0034164	88	94	105	482	366	443	2.27131	2.34692	2.45994	12.1326	9.27037	9.09662	1.31774e-06	2.16868	up
EVM0034217	78	126	133	32	22	26	1.58642	2.56229	2.53733	1.0254	0.429162	0.40643	0.0034874	-2.06626	down
EVM0034243	386	572	311	6608	6823	8322	5.11938	7.36189	3.7648	85.5207	88.9796	87.9284	7.62913e-66	4.07667	up
EVM0034278	132	156	115	411	718	934	1.62543	1.98781	1.24581	4.6631	8.15839	15.1793	6.5612e-05	2.32831	up
EVM0034388	0	8	0	43	68	79	0	0.048795	0	0.289619	0.497241	0.446223	2.32399e-08	4.51895	up
EVM0034474	227	224	216	64	62	64	4.08384	3.42507	3.57055	1.25368	1.59067	0.941182	0.00202234	-1.81557	down
EVM0034529	460	1606	597	12825	23461	24453	4.8339	13.5185	5.51678	91.7893	166.558	141.596	7.76797e-13	4.49124	up
EVM0034777	0	0	0	719	759	627	0	0	0	13.0073	14.0654	9.12472	6.77699e-59	Inf	up
EVM0034792	22	38	28	586	848	626	0.373803	0.557382	0.377525	9.69885	14.3471	8.65443	2.42943e-16	4.55843	up
EVM0034889	110	140	66	3722	2130	3187	2.08206	2.57046	1.13495	69.1081	39.8403	48.3071	3.19095e-20	4.80881	up
EVM0034901	4	89	18	478	2570	3880	0.096209	2.06962	0.376825	11.2635	61.0474	74.8628	0.00111918	5.91047	up
EVM0034948	0	12	0	44	50	75	0	0.116101	0	0.424868	0.489919	0.614573	1.38967e-06	3.75598	up
EVM0034993	4692	6386	4259	722	996	852	89.7212	95.0222	59.2752	12.4305	20.1313	11.8308	3.80183e-09	-2.58163	down
EVM0035003	7	6	10	43	188	215	0.107138	0.100543	0.157785	0.741935	3.27434	3.02773	0.00382239	4.27196	up
EVM0035062	1141	1522	1224	12201	10812	15756	21.2683	27.5181	20.7976	221.708	197.961	233.701	1.0057e-39	3.29929	up
EVM0035163	116	164	133	388	454	718	2.08521	2.75865	2.14696	6.64427	7.82901	10.0801	3.71301e-06	1.89133	up
EVM0035230	0	3	0	49	77	75	0	0.054542	0	1.25109	1.91129	1.49521	5.20193e-11	6.02423	up
EVM0035231	200	328	174	910	2186	1776	3.06407	5.47635	2.64115	17.042	40.4611	24.9123	0.00113382	2.7853	up
EVM0035275	1946	1885	1750	344	791	132	49.149	46.1774	40.2892	8.45038	19.6079	2.64455	3.38943e-09	-2.08616	down
EVM0035312	1164	1543	1605	477	362	594	16.7561	21.549	21.0702	6.67978	5.11084	6.80281	4.27611e-09	-1.60235	down
EVM0035318	429	467	497	721	1058	1465	8.76468	9.25037	9.26286	14.3583	21.2294	23.8178	0.00491855	1.20162	up
EVM0035320	268	287	217	68	91	25	4.25557	4.38945	3.09158	1.03468	1.41646	0.301414	0.000150151	-2.03414	down
EVM0035352	149	718	273	12632	18721	19669	2.54264	12.0269	4.29985	212.851	317.851	270.531	7.57585e-35	5.46891	up
EVM0035395	604	533	338	155	121	13	16.2442	13.9161	8.28352	4.06313	3.18295	0.258593	0.000374129	-2.316	down
EVM0035432	0	4	0	97	122	238	0	0.07729	0	2.49986	3.15368	5.01555	1.6379e-10	6.76067	up
EVM0035484	16	37	27	321	313	616	0.222036	0.493422	0.334789	4.40076	4.3263	6.90194	6.22015e-10	3.93611	up
EVM0035496	153	153	181	536	398	452	2.2129	1.95765	2.20201	7.49247	5.30729	4.78183	0.00066532	1.51202	up
EVM0035579	1568	1875	1498	586	852	498	21.1916	24.5741	18.4231	7.67231	11.2998	5.33751	1.00542e-05	-1.33677	down
EVM0035620	0	0	0	87	73	141	0	0	0	1.57062	1.33818	2.10843	3.80543e-16	Inf	up
EVM0035711	661	665	454	2222	2735	3366	16.2518	15.8466	10.1557	53.2297	66.0176	65.8172	2.12641e-19	2.19901	up
EVM0035713	1269	1307	1089	7280	8872	13232	40.3171	40.315	31.5682	224.917	276.179	333.633	2.46135e-13	2.97398	up
EVM0035785	5	3	0	55	126	104	0.067185	0.047302	0	1.06556	2.49762	1.52733	1.92848e-07	5.09927	up
EVM0035945	0	0	0	39	74	90	0	0	0	1.14056	2.37011	2.10113	5.29427e-13	Inf	up
EVM0035982	0	9	6	59	271	257	0	0.100107	0.030584	1.08625	4.39189	3.13701	0.00068168	5.29992	up
EVM0035989	6	13	27	57	128	211	0.41066	0.860673	1.70664	3.8204	8.71566	11.6176	0.00687575	3.11285	up
EVM0036031	103	102	67	290	359	318	3.61492	3.39207	2.123	9.75351	12.3222	8.78359	0.000317867	1.81807	up
EVM0036053	168	205	259	588	839	854	2.35836	2.80111	3.32463	8.08539	11.6142	9.5827	9.57419e-08	1.8589	up
EVM0036104	0	2	0	33	96	113	0	0.043334	0	0.709604	2.0896	1.99132	1.19202e-06	6.8617	up
EVM0036120	0	5	0	120	116	242	0	0.136214	0	4.34421	4.09539	7.31338	7.11232e-13	6.50445	up
EVM0036125	0	3	0	365	795	1357	0	0.065503	0	12.4053	26.972	37.4838	1.48089e-10	9.63725	up
EVM0036136	4	19	7	206	201	140	0.016204	0.087133	0.031546	1.20362	1.60378	0.967319	7.82818e-11	4.19463	up
EVM0036172	1124	962	1131	407	561	500	6.57568	5.32708	6.08807	2.27711	3.32106	2.3797	0.000225354	-1.12896	down
EVM0036176	1047	917	613	84	325	188	13.3956	11.3388	7.1091	1.0589	3.89353	1.73835	0.000519364	-2.10999	down
EVM0036198	28	31	16	187	184	233	0.655125	0.706024	0.321788	4.27432	4.24473	4.35686	4.7838e-07	2.97897	up
EVM0036200	528	626	672	2138	2172	3240	5.46585	6.36506	6.35644	21.6279	22.2258	26.8289	1.81151e-17	2.03337	up
EVM0036238	602	472	459	207	265	126	29.8273	22.6765	20.7335	10.0074	12.8721	4.94084	0.00131181	-1.33804	down
EVM0036266	23	41	19	94	201	288	0.577923	1.03939	0.430917	2.39321	5.16319	5.99952	0.00187684	2.7708	up
EVM0036279	2714	2637	2866	1065	1160	1082	16.9698	14.3892	14.8544	5.91483	6.48914	4.92484	2.30187e-08	-1.30977	down
EVM0036281	20	20	4	120	120	116	0.179192	0.173896	0.025964	1.0914	1.10772	0.866908	1.02178e-05	2.97835	up
EVM0036310	649	633	686	214	295	356	10.4955	8.93188	9.32367	3.12504	4.62305	4.90157	0.00192418	-1.19784	down
EVM0036346	16	0	0	37	68	60	0.383641	0	0	0.874389	1.60336	1.14252	1.52086e-05	3.29771	up
EVM0036361	3	0	0	40	116	69	0.0819	0	0	1.30434	3.89332	1.84032	7.95701e-05	6.17676	up
EVM0036390	0	45	15	227	1447	1952	0	0.782534	0.243877	3.98693	26.4471	27.9941	0.00135843	5.88338	up
EVM0036403	118	125	129	933	477	552	3.40207	2.56623	3.13929	21.9152	12.18	11.2351	0.00120224	2.40309	up
EVM0036407	154	99	215	495	471	442	4.55082	2.84138	5.79765	14.2792	13.7098	10.4066	0.000279726	1.60968	up
EVM0036464	38	2774	577	5111	11318	15496	1.56594	113.13	22.1039	209.434	467.315	518.317	0.000685801	3.19631	up
EVM0036509	397	417	308	860	853	1312	10.9632	11.1578	7.73842	23.147	23.1429	28.8409	3.74746e-06	1.39975	up
EVM0036523	36	19	21	74	100	141	0.803729	0.404438	0.426292	1.62575	2.22082	2.54718	0.00481143	2.01667	up
EVM0036540	8	19	16	68	190	175	0.090367	0.242132	0.198521	0.968601	3.2329	2.24852	0.000988628	3.33585	up
EVM0036555	18	1499	247	4057	22756	24281	0.36912	30.8519	4.77499	83.9097	474.24	409.94	0.00302025	4.82041	up
EVM0036595	7	18	12	97	169	162	0.155749	0.422207	0.267741	2.3003	4.0418	3.15183	1.11778e-07	3.53036	up
EVM0036630	28	17	14	231	217	233	0.534207	0.300767	0.232285	4.34361	4.03568	3.56275	1.71573e-09	3.50698	up
EVM0036634	345	362	322	1560	1858	2305	8.16681	8.21005	6.84047	37.1481	43.6773	43.8722	6.51831e-22	2.45876	up
EVM0036639	785	663	589	1357	1428	1828	13.345	11.1274	9.05045	23.2359	23.6723	25.2535	1.5506e-05	1.15762	up
EVM0036677	224	218	223	1143	986	1397	3.02854	2.47997	3.02099	13.7144	11.3863	13.1783	5.22742e-16	2.39113	up
EVM0036709	5008	6137	6716	1558	3210	2756	44.0552	52.3343	53.8315	13.3407	27.71	19.2756	5.47092e-07	-1.24007	down
EVM0036742	7	6	15	43	74	79	0.176781	0.138734	0.330093	1.05527	1.84639	1.60221	0.000214678	2.82924	up
EVM0036747	96	96	62	470	696	556	1.44731	1.10669	0.641012	5.4193	9.07263	6.70342	6.22015e-10	2.75225	up
EVM0036800	0	1	0	52	117	96	0	0.010205	0	0.585911	1.25503	0.927968	2.82343e-10	8.01374	up
EVM0036834	34	633	182	3158	12940	24844	1.48339	27.2596	7.34637	136.662	564.291	877.722	0.00390808	5.53365	up
EVM0036910	7421	11566	7641	1885	2461	2343	42.0297	64.5339	39.7293	11.787	14.7409	11.8391	3.31077e-05	-1.99987	down
EVM0036952	0	8	5	62	165	123	0	0.132577	0.079627	1.07113	2.83653	1.70873	3.29146e-05	4.7736	up
EVM0037009	0	4	12	76	56	44	0	0.068184	0.185399	1.46758	1.11972	0.672521	8.0051e-06	3.54379	up
EVM0037018	1069	763	849	246	492	399	20.4565	14.0551	14.1352	4.60621	9.05094	5.96581	0.00190962	-1.23963	down
EVM0037020	3006	2350	2320	378	937	182	73.9091	55.9771	51.0953	8.18298	21.9937	3.48439	5.37382e-08	-2.31107	down
EVM0037038	180	867	327	12643	14078	16977	4.87363	22.8059	8.07879	334.398	375.168	366.541	5.47633e-75	4.97227	up
EVM0037039	6	2	12	62	60	39	0.57384	0.107986	1.20303	6.64193	6.44254	3.37857	0.000105295	3.06595	up
EVM0037081	1872	5191	2013	121830	110949	136255	27.8651	74.9585	27.3148	1768.62	1622.22	1614.16	2.27388e-18	5.32393	up
EVM0037105	1571	1667	1121	621	686	584	12.1333	12.535	7.62794	4.50251	5.16192	3.59926	0.00216815	-1.21171	down
EVM0037149	4	2	0	137	67	40	0.051492	0.028425	0	2.27969	1.10838	0.536155	0.00181105	5.31209	up
EVM0037174	1748	1885	1934	520	522	641	32.0253	33.4887	32.289	9.27741	9.37288	9.33513	7.66629e-12	-1.73418	down
EVM0037189	188	383	202	9503	7351	10750	2.52572	6.16925	3.01009	150.076	116.954	139.038	3.40874e-90	5.13536	up
EVM0037196	1	1	2	44	182	258	0.094359	0.128287	0.166105	5.77596	24.5837	28.2378	8.29119e-05	6.91277	up
EVM0037274	95	49	57	302	259	390	0.871334	0.434636	0.476384	2.70297	2.33516	2.85475	1.00569e-05	2.21219	up
EVM0037311	10	12	5	339	358	312	0.104899	0.122348	0.046604	3.79903	3.75222	2.84321	6.07134e-20	5.2058	up
EVM0037354	14	16	0	452	227	255	0.447169	0.364542	0	15.8666	7.75761	7.38175	1.18425e-07	4.91216	up
EVM0037389	4	21	18	78	509	621	0.041825	0.286817	0.188475	1.08754	5.68986	5.65593	0.00713923	4.80553	up
EVM0037392	0	4	3	62	136	139	0	0.097346	0.076426	2.11419	4.16553	4.88113	2.45726e-09	5.60351	up
EVM0037404	32	40	28	523	920	1119	2.42597	2.98097	1.9201	39.3105	69.7499	68.6922	1.14517e-12	4.6546	up
EVM0037494	2738	2695	2775	8700	7494	9496	26.445	25.2426	24.4285	81.8809	71.0724	72.9537	6.03924e-12	1.63653	up
EVM0037532	524	601	533	252	266	230	7.9164	8.53799	7.19821	3.66902	3.92489	2.74402	0.00642707	-1.14482	down
EVM0037600	92	302	149	1057	3653	4592	1.61405	4.39344	2.37264	16.7506	54.3668	52.3837	0.00138458	4.0702	up
EVM0037646	70	133	82	697	1134	1683	1.25971	2.37119	1.35368	12.9792	20.3843	24.727	2.18397e-07	3.59312	up
EVM0037651	310	630	299	3728	7511	9928	11.5571	22.806	10.1677	135.572	275.229	294.709	5.31803e-07	4.06071	up
EVM0037664	0	1	0	114	90	328	0	0.004832	0	1.23096	0.962072	2.8732	1.31277e-05	8.95618	up
EVM0037689	6	15	3	277	303	381	0.304708	0.821531	0.131745	15.4846	17.0805	17.3844	1.18638e-19	5.28296	up
EVM0037708	451	567	539	220	166	159	8.79908	10.7399	9.60191	4.18604	3.18004	2.4621	0.000269995	-1.50722	down
EVM0037732	703	586	701	189	343	346	5.75648	4.73167	5.06678	1.36886	2.9823	2.0719	0.00190826	-1.18622	down
EVM0037758	400	571	396	703	1050	1234	2.82124	4.04472	2.71767	5.70782	6.61743	6.40512	0.00395356	1.10892	up
EVM0037782	379	379	241	45	98	22	8.25075	8.0109	4.77374	0.937181	2.08827	0.37296	4.42806e-06	-2.56316	down
EVM0037833	66	46	101	15	15	10	1.60016	1.09376	2.25782	0.337236	0.3411	0.177348	0.00140384	-2.37583	down
EVM0037890	308	531	337	9342	7601	7813	5.85125	9.66993	5.75539	172.039	142.346	120.376	3.63344e-52	4.39139	up
EVM0037917	66	77	60	0	0	0	1.83046	2.09146	1.51489	0	0	0	1.18091e-13	#NAME?	down
EVM0038103	1471	1230	1377	239	380	74	22.4504	18.2146	19.1603	3.55188	5.68366	0.894596	1.38529e-19	-2.50618	down
EVM0038164	801	755	731	1874	2202	2527	10.2834	9.38311	8.53793	23.5328	27.7734	25.8027	3.5372e-10	1.51745	up
EVM0038179	1252	1566	1582	2624	4309	4538	11.8574	14.6454	12.8343	24.715	39.8503	34.6622	0.000602319	1.37863	up
EVM0038257	32	97	38	1494	2732	3624	0.631907	1.86535	0.677769	28.9712	53.3782	57.3711	1.62693e-12	5.5216	up
EVM0038337	0	2	3	48	65	91	0	0.043824	0.06601	1.3398	1.93734	1.98907	5.5145e-10	5.3786	up
EVM0038403	0	0	5	56	128	106	0	0	0.111565	1.25496	2.58371	1.94139	2.25142e-08	5.96919	up
EVM0038428	4497	4397	4434	1664	2375	1962	60.6425	56.8534	53.4157	21.5108	29.5063	22.9525	7.99242e-07	-1.14739	down
EVM0038461	2	14	10	343	218	242	0.043033	0.211841	0.133666	6.64575	4.26349	3.76513	2.90972e-16	4.9645	up
EVM0038500	366	369	279	142	140	21	14.1217	13.8128	9.78691	5.33732	5.27923	0.629882	0.000442362	-1.70025	down
EVM0038508	1109	778	678	140	232	40	21.8112	14.8381	12.1514	2.6788	4.46762	0.620658	1.45292e-05	-2.59771	down
EVM0038509	3385	4269	3544	24593	25768	34315	56.7851	69.635	54.2205	405.827	427.87	461.855	1.28183e-20	2.9017	up
EVM0038528	62	124	47	333	388	496	1.97883	3.73167	1.3101	9.86542	12.0128	12.4538	2.35148e-07	2.35317	up
EVM0038643	6	7	3	97	57	46	0.079895	0.085545	0.029246	1.25933	0.748439	0.488937	0.000139928	3.6349	up
EVM0038675	0	0	0	6954	6933	7464	0	0	0	279.704	280.958	245.057	1.2406e-215	Inf	up
EVM0038705	2675	3969	3669	10966	21572	25283	44.0933	63.4618	55.1211	176.169	349.111	331.513	0.000116243	2.47621	up
EVM0038790	139	155	111	3462	2743	3182	1.93143	2.08523	1.39645	46.8607	37.4115	35.1628	1.77166e-70	4.52091	up
EVM0038797	2933	3264	2791	1477	1277	541	51.2931	50.8918	45.5117	22.6817	19.9615	11.0745	7.61718e-06	-1.41975	down
EVM0038849	68	113	42	1942	2079	2626	2.8052	4.58585	1.59621	79.9491	86.6605	88.8409	1.47997e-67	4.86448	up
EVM0038887	1214	1583	1180	601	560	643	25.7017	32.5798	22.7678	12.5827	11.5428	10.6552	6.08162e-05	-1.1516	down
EVM0038892	14	4	43	147	93	165	0.192958	0.054605	0.566608	2.07596	1.31441	1.89801	4.11356e-05	2.76808	up
EVM0038946	148	115	14	356	286	286	1.80385	1.31224	0.111472	4.29942	3.55439	2.80611	0.000774343	1.6993	up
EVM0038967	0	13	8	128	178	139	0	0.460867	0.252142	2.95646	4.14042	2.87039	1.56798e-10	4.42958	up
EVM0039031	110	60	19	406	257	233	0.844259	0.38722	0.113786	2.94161	1.85629	1.41731	0.00138657	2.21253	up
EVM0039048	0	3	0	48	346	417	0	0.027997	0	0.671339	4.89738	4.78378	0.000109616	8.01522	up
EVM0039052	2498	2020	1730	944	920	970	13.6855	10.6356	8.67196	4.83797	4.97056	4.01499	0.00131542	-1.15409	down
EVM0039117	2	0	0	104	138	113	0.019462	0	0	1.35121	1.79928	1.19242	1.63301e-15	7.40927	up
EVM0039196	4	5	0	208	106	128	0.058862	0.052385	0	3.54647	1.74779	1.73755	1.20813e-09	5.56737	up
EVM0039220	4	18	8	69	127	128	0.058307	0.271183	0.112234	1.04757	1.93994	1.59098	1.09067e-06	3.42171	up
EVM0039231	54	79	91	317	540	436	0.381739	0.536506	0.581546	2.18262	3.74426	2.45047	2.24466e-06	2.54634	up
EVM0039311	92	805	216	7938	19743	22027	1.09691	9.91308	2.38314	97.6575	263.496	236.75	2.56054e-08	5.45291	up
EVM0039391	82	98	64	35	20	3	2.76329	3.19662	1.94138	1.1223	0.640818	0.054134	0.00638971	-2.03602	down
EVM0039443	32	0	0	68	79	66	0.372195	0	0	0.786475	0.930063	0.623328	0.000268151	2.67257	up
EVM0039486	143	200	184	1103	787	915	1.69959	1.78815	1.53986	11.2579	7.81473	7.54481	9.40697e-14	2.41285	up
EVM0039540	24	91	32	3650	3051	4035	0.897395	3.30363	1.07184	134.394	113.186	121.291	8.66072e-111	6.16738	up
EVM0039543	0	2	12	108	80	91	0	0.066607	0.410337	3.65157	2.58059	2.51595	1.11882e-08	4.40237	up
EVM0039597	719	587	689	238	387	337	11.016	8.67185	9.44386	3.57678	5.77085	4.0812	0.00695087	-1.05095	down
EVM0039639	11	23	24	133	123	134	0.394356	0.834	0.797461	4.6572	4.28118	4.01495	4.10052e-05	2.76138	up
EVM0039702	6	4	3	46	51	47	0.109341	0.062154	0.036865	0.898433	1.06098	0.750302	1.17684e-05	3.45214	up
EVM0039776	1424	1056	1217	318	425	215	17.8157	12.8142	13.8778	3.87076	5.21148	2.13266	1.01783e-09	-1.92592	down
EVM0039829	50	62	49	190	228	315	0.71195	0.971369	0.680969	1.70476	3.39395	3.79931	9.67748e-05	2.16393	up
EVM0039849	2	5	28	88	261	253	0.022661	0.042441	0.292418	0.992726	3.01669	2.35867	0.000225354	4.1729	up
EVM0039876	5944	7724	6217	1675	2011	1786	75.1345	94.6222	71.7181	20.7485	25.1785	18.1687	7.94308e-13	-1.8612	down
EVM0039974	39	71	48	1006	924	1064	0.941745	1.67092	1.05992	23.8134	22.0248	20.5544	9.65368e-34	4.23588	up
EVM0039996	34	35	37	0	13	2	0.880478	0.883123	0.872744	0	0.324699	0.039111	0.000402103	-2.75144	down
EVM0040011	3	25	0	620	338	604	0.081236	0.847113	0	21.4885	11.7867	17.092	3e-21	5.74318	up
EVM0040017	2753	3344	2314	841	1487	1628	26.0519	29.9791	18.9252	7.59234	13.9115	10.6713	0.00748316	-1.10827	down
EVM0040103	117	126	147	290	379	418	2.33318	2.27072	2.47883	5.23131	6.63162	6.77741	0.0030974	1.47715	up
EVM0040107	0	9	2	211	632	719	0	0.109727	0.020291	2.69575	8.18924	7.51669	2.52907e-08	7.12005	up
EVM0040184	1532	1407	1375	724	634	519	31.0102	29.1183	25.5836	14.2944	12.291	8.34631	1.25292e-05	-1.1946	down
EVM0040188	165	152	162	415	711	918	1.84116	1.64582	1.64186	4.52355	7.80818	8.17375	0.000141978	2.0734	up
EVM0040363	0	0	0	72	53	47	0	0	0	1.96047	1.4514	1.0466	7.99742e-13	Inf	up
EVM0040413	87	165	147	8	5	12	1.4192	2.63201	2.20657	0.12428	0.070604	0.156048	6.89818e-09	-4.02334	down
EVM0040419	71	45	77	638	364	556	0.823486	0.496475	0.697444	6.68842	3.94928	5.21616	6.68167e-11	3.00949	up
EVM0040459	667	924	742	419	345	362	12.6783	17.1533	12.866	7.77034	6.42144	5.45788	0.00339171	-1.05268	down
EVM0040546	423	512	543	864	1373	1656	7.92615	9.31352	9.27515	15.7939	25.2962	24.7178	0.000781696	1.38784	up
EVM0040646	215	195	225	611	454	543	3.97709	3.5284	3.91737	12.2044	8.9695	8.61704	0.00136798	1.33794	up
EVM0040668	546	1374	541	29269	27811	30266	6.12812	15.0002	5.57623	318.66	305.123	269.539	1.40263e-54	5.13214	up
EVM0040759	534	602	594	1308	999	1196	8.15504	8.9172	8.28163	19.4836	14.9983	14.5388	0.000892764	1.01422	up
EVM0040901	52	53	49	828	627	716	0.576688	0.600718	0.552956	9.29319	7.61916	6.84533	1.23036e-22	3.81146	up
EVM0040987	24	26	14	152	124	138	0.461929	0.487145	0.244727	2.87024	2.35893	2.11803	4.52193e-05	2.67229	up
EVM0040996	1526	1638	1679	2466	3150	4208	31.6864	32.9894	31.7852	49.8983	64.2118	69.5013	0.000236046	1.00444	up
EVM0041033	0	41	3	126	466	503	0	0.773164	0.036673	2.42485	9.12415	7.96708	0.00048159	4.59299	up
EVM0041100	483	638	410	6818	7156	10450	4.96234	6.36328	3.83939	68.3164	72.2511	85.4792	9.27763e-42	3.96664	up
EVM0041144	11	33	8	318	304	293	0.212274	0.632907	0.138961	6.15403	5.92233	4.62648	5.8006e-14	4.11625	up
EVM0041158	0	0	0	163	62	48	0	0	0	5.33164	2.02329	1.28319	0.000153531	Inf	up
EVM0041176	303	289	321	1078	773	735	2.72557	3.85627	3.97482	9.15355	6.56232	5.94428	0.0001231	1.50962	up
EVM0041196	0	0	0	47	190	154	0	0	0	0.515471	3.67725	2.21142	1.26122e-06	Inf	up
EVM0041213	1126	1029	1102	507	295	414	63.2093	55.6525	56.2176	26.3072	14.8201	16.8343	1.82297e-06	-1.42957	down
EVM0041238	552	483	446	222	273	32	57.4277	48.7471	42.2644	22.4742	27.8683	2.58052	0.00425356	-1.43991	down
EVM0041252	1803	1840	1347	651	811	516	42.9391	42.508	29.2494	15.0957	18.9657	9.77305	0.000324951	-1.32878	down
EVM0041253	177	179	160	349	663	840	6.46496	6.36399	5.3881	12.4107	30.4998	24.4756	0.00335577	1.81965	up
EVM0041254	5	8	0	54	119	135	0.135238	0.257235	0	1.77486	3.94581	3.62391	3.62033e-07	4.50172	up
EVM0041359	3	9	8	49	56	61	0.023674	0.091601	0.07552	0.559993	0.635973	0.564652	7.8862e-05	3.06175	up
EVM0041408	49	194	80	322	905	1026	1.66099	6.41808	2.48052	10.7309	30.3893	27.918	0.00622961	2.7779	up
EVM0041417	19	0	9	120	75	146	0.846279	0	0.353875	5.29359	3.31023	5.26742	2.87569e-07	3.56853	up
EVM0041570	10	21	6	481	436	447	0.727673	1.4426	0.098987	35.5958	32.5365	26.9103	3.11663e-24	5.18048	up
EVM0041573	266	269	274	40	74	101	6.323	5.91955	5.02095	0.561203	1.05823	2.54777	0.000423074	-1.93498	down
EVM0041577	87	66	78	4	2	10	1.73355	1.26248	1.41275	0.064903	0.038912	0.230674	3.82355e-07	-3.91906	down
EVM0041593	331	409	316	740	1356	2050	8.45978	10.1399	7.3681	18.4674	34.0822	41.7608	0.00945028	1.93927	up
EVM0041675	4	5	2	54	53	60	0.060943	0.087123	0.021601	1.05636	1.03606	0.951058	8.40699e-07	3.8949	up
EVM0041701	70	77	49	341	457	381	1.2458	1.33333	0.806813	5.94574	8.31011	5.42866	2.98872e-08	2.58005	up
EVM0041711	0	0	0	132	37	94	0	0	0	5.84102	1.65442	3.38593	7.26931e-07	Inf	up
EVM0041730	1026	977	931	2176	2715	4370	14.2157	12.674	11.8366	34.1119	41.7583	59.2641	0.000290714	1.62757	up
EVM0041733	4970	5608	3840	1875	1913	1783	127.575	140.63	89.9065	47.8802	47.9634	38.2629	0.000105177	-1.38013	down
EVM0041836	4	2	12	72	41	97	0.064161	0.039545	0.171281	1.17658	0.643517	1.49167	3.08496e-06	3.56402	up
EVM0041849	6	14	6	96	339	403	0.197099	0.354759	0.143316	2.23877	8.19431	8.13029	0.000176094	4.97689	up
EVM0041991	51	71	91	868	653	626	0.303693	0.421538	0.505005	5.50382	5.15507	3.26639	5.60191e-16	3.35397	up
EVM0042004	1007	1378	1162	367	329	284	11.8124	15.3356	12.3449	4.40935	3.96476	2.95516	1.17885e-10	-1.84864	down
EVM0042010	346	247	383	132	83	77	5.83016	3.96038	6.81748	2.12845	1.30503	1.32204	0.000602473	-1.72561	down
EVM0042030	16	23	18	124	263	271	0.690459	0.995506	0.524592	5.37705	10.6451	9.61161	2.05803e-06	3.51787	up
EVM0042066	61	96	62	1158	1107	1907	1.30075	2.01106	1.22103	24.3047	23.3754	32.5807	1.67263e-21	4.21901	up
EVM0042078	42	102	55	160	314	410	0.448494	1.09846	0.554851	2.06209	3.66455	4.06383	0.00339171	2.12461	up
EVM0042126	101	80	77	261	267	373	2.30781	1.80241	1.60174	5.86298	6.04066	6.82555	0.00060955	1.7797	up
EVM0042178	131	157	188	0	95	0	7.558	8.75044	10.1609	0	5.37067	0	0.00115051	-2.21732	down
EVM0042187	5850	5601	4773	2398	2549	2246	78.9047	73.3506	58.2652	31.3556	33.4764	24.0805	7.02572e-07	-1.17617	down
EVM0042246	4	19	9	465	456	483	0.061448	0.279306	0.113339	7.25732	7.19132	6.12777	4.2557e-26	5.45074	up
EVM0042395	81	60	79	264	181	224	0.863721	0.977469	0.8048	2.89657	2.30744	3.58832	0.00822522	1.60146	up
EVM0042416	240	307	157	6481	4842	7090	3.86764	4.96999	2.37337	73.5158	55.1308	65.6149	5.10478e-78	4.6781	up
EVM0042451	361	310	220	10352	7045	8112	9.37382	7.15232	4.34174	244.974	171.986	158.703	1.93876e-29	4.82239	up
EVM0042464	145	165	330	477	500	555	3.70434	3.71328	6.99275	11.7937	10.7311	11.7417	0.00389715	1.28257	up
EVM0042505	31	60	2	115	135	125	0.665162	1.28797	0.037546	2.73296	2.85998	2.162	0.00394235	1.96785	up
EVM0042548	201	182	210	78	63	42	4.41	3.87199	4.2118	1.67024	1.34607	0.734913	0.00647208	-1.67617	down
EVM0042626	111	121	181	842	1485	1736	0.682864	0.732855	1.06061	5.25725	9.34759	8.79373	1.19909e-08	3.30033	up
EVM0042677	2375	2438	2659	821	1801	843	43.9336	40.886	43.155	11.4691	25.2948	16.3055	0.00417432	-1.07854	down
EVM0042686	1	5	5	506	1278	464	0.031271	0.126592	0.07254	6.22752	15.8596	6.44048	4.01599e-05	7.73603	up
EVM0042687	0	3	0	138	220	170	0	0.034035	0	2.33787	3.75444	2.35565	8.15631e-19	7.42857	up
EVM0042831	270	294	277	1915	1576	1326	2.98346	3.15804	2.79488	20.7017	17.157	11.6957	2.56918e-10	2.52607	up
EVM0042855	1502	821	639	114	94	111	29.4714	15.7144	11.6193	2.14698	1.83271	1.76347	0.00312008	-3.24351	down
EVM0042878	4538	6289	5563	1281	1752	662	77.8291	78.3817	65.1643	16.0249	22.0908	6.75693	3.70176e-12	-2.11236	down
EVM0043014	116	81	140	29	24	22	2.53266	1.71363	2.7976	0.620269	0.516728	0.369975	0.00208372	-2.1515	down
EVM0043028	7	2	0	48	149	152	0.132052	0.027978	0	0.909843	2.73319	2.35791	2.17811e-05	5.20384	up
EVM0043082	449	542	400	110	115	57	30.6848	35.8973	24.8903	7.3171	7.68144	3.0549	1.00354e-07	-2.28263	down
EVM0043122	0	0	0	92	256	683	0	0	0	2.39977	6.76511	14.6255	8.51509e-05	Inf	up
EVM0043189	4	4	9	107	147	186	0.036665	0.044643	0.089116	1.26228	1.75025	1.78736	2.80188e-11	4.70901	up
EVM0043209	30	79	33	340	310	359	0.242453	0.680721	0.268443	2.91112	2.80781	2.46757	1.53937e-08	2.81146	up
EVM0043237	47	24	9	195	166	172	2.79089	1.36428	0.467064	11.2555	9.66557	8.11695	8.88479e-06	2.69591	up
EVM0043241	2075	1903	2053	707	761	1500	27.4531	23.5084	25.8733	10.3282	10.8232	15.9891	7.36386e-05	-1.0585	down
EVM0043295	954	1111	993	1757	2115	2469	8.96171	10.1237	8.49928	16.0787	19.5063	18.4391	3.98158e-05	1.0407	up
EVM0043490	23	50	22	912	438	746	0.435153	0.904151	0.373174	16.8194	8.13118	11.23	1.47949e-10	4.43839	up
EVM0043552	39	27	14	1287	433	557	0.796988	0.528943	0.246014	25.6308	8.67562	9.04987	0.0019426	4.80803	up
EVM0043570	0	2	0	102	196	304	0	0.067605	0	3.51537	6.83404	8.62092	7.87199e-11	8.16501	up
EVM0043581	2	3	0	38	80	68	0.018909	0.044987	0	0.795156	1.4764	1.61423	2.66547e-08	5.16759	up
EVM0043600	107	0	0	301	147	207	0.99326	0	0	3.28088	1.55423	1.53395	0.00619461	2.54095	up
EVM0043646	853	836	850	85	205	15	19.2312	18.4876	17.5356	1.59171	4.24102	0.280199	1.30063e-18	-2.9889	down
EVM0043682	0	9	6	93	611	596	0	0.15269	0.088955	1.64241	11.5552	9.01017	0.00048159	6.44399	up
EVM0043750	33	35	18	1286	1384	1716	0.449866	0.462926	0.224191	17.3333	18.799	18.8788	2.27404e-64	5.6407	up
EVM0043815	74	55	60	2312	1159	1462	1.1697	0.858251	0.875307	36.4035	18.3685	18.8785	6.2768e-09	4.70047	up
EVM0043828	41	37	62	2	2	4	3.20051	2.26224	3.72606	0.203948	0.254836	0.379601	4.98039e-07	-4.14788	down
EVM0043877	239	195	25	697	811	937	2.5928	2.05302	0.246891	7.36897	8.64135	8.0868	1.74995e-12	2.35796	up
EVM0043931	3	1	6	127	117	139	0.037245	0.003309	0.070384	1.69879	1.57394	1.5094	3.92946e-12	5.29116	up
EVM0043938	0	0	0	85	112	126	0	0	0	1.24812	1.63956	1.50591	1.05565e-16	Inf	up
EVM0043980	18	20	27	438	309	363	0.292481	0.376454	0.572843	10.1177	6.8529	6.61142	1.74214e-15	4.10385	up
EVM0044028	63	81	82	694	681	713	0.551379	0.686968	0.654017	5.94094	5.86786	4.97683	4.6161e-17	3.21061	up
EVM0044074	13	0	2	91	55	126	0.475422	0	0.033924	3.24598	1.96173	3.67971	2.90304e-08	4.1031	up
EVM0044080	2733	2745	2200	787	1021	613	52.3939	51.0291	38.4408	14.6814	19.213	9.33081	4.62515e-08	-1.6543	down
EVM0044096	8	23	7	596	978	1175	0.56122	1.64733	0.432055	43.3393	71.6772	69.7084	6.67034e-22	6.14328	up
EVM0044153	303	242	244	58	40	55	26.3474	20.333	19.2894	4.85335	3.34002	3.75513	1.17302e-05	-2.38207	down
EVM0044172	354	478	506	102	115	96	5.2441	6.81062	6.73586	1.4307	1.63266	1.1157	1.87328e-06	-2.08159	down
EVM0044202	377	468	517	895	766	1223	4.8699	5.86545	6.09028	11.2711	9.71299	12.5693	0.000964542	1.06938	up
EVM0044311	50	46	25	189	113	187	0.447606	0.369294	0.270283	2.03537	1.53872	1.2325	0.00186167	1.97766	up
EVM0044334	362	212	201	495	462	730	7.17082	4.46954	3.61509	9.69379	9.02441	11.5963	0.00840577	1.08501	up
EVM0044445	2469	2173	2069	812	1154	983	47.0903	40.1848	35.9661	15.0891	21.6079	14.9009	1.38336e-06	-1.18836	down
EVM0044466	635	402	1233	0	0	0	18.1114	11.1046	32.0553	0	0	0	5.33083e-13	#NAME?	down
EVM0044576	288	456	459	87	113	143	2.64936	4.30614	4.25757	0.771897	1.01298	1.0469	9.37645e-05	-1.81631	down
EVM0044582	7	20	15	134	145	144	0.067534	0.21524	0.151481	1.45792	1.59414	1.27619	5.00553e-07	3.33908	up
EVM0044588	0	19	20	256	357	400	0	0.364154	0.357076	8.2034	10.6175	10.5972	1.75375e-17	4.72531	up
EVM0044642	16	17	30	311	264	395	0.270058	0.277868	0.388307	5.12689	4.26405	5.37542	1.86601e-13	3.94978	up
EVM0044684	0	0	4	32	134	86	0	0	0.047889	0.533815	2.28675	1.18079	0.00115051	6.09861	up
EVM0044723	769	1248	907	4580	7529	7221	10.6497	15.4293	10.333	60.3294	89.9474	69.5127	2.6203e-09	2.71931	up
EVM0044760	15	14	15	360	592	1118	0.212536	0.201196	0.193716	5.29529	8.76515	13.4326	7.18358e-07	5.51647	up
EVM0044850	107	130	128	15	13	0	2.68776	3.40029	3.43024	0.314928	0.40063	0	9.01549e-08	-3.63742	down
EVM0044866	234	399	470	65	152	97	2.07831	3.2277	3.81104	0.599298	1.32441	0.670414	0.00048467	-1.78238	down
EVM0044918	4440	3699	2502	267	562	475	46.5969	37.3456	23.7169	2.69424	5.7216	3.91698	8.11835e-07	-3.04536	down
EVM0044960	622	633	524	120	57	54	22.8676	22.5464	17.5476	4.27431	2.05122	1.57784	2.0693e-13	-2.94114	down
EVM0044993	1429	1744	1670	4633	8278	9172	22.7575	26.9411	24.2486	72.0227	129.786	116.219	2.2884e-05	2.17925	up
Apium_graveolens_newGene_7	0	2	0	81	45	75	0	0.123827	0	5.02506	2.78822	3.80036	1.05686e-11	6.59854	up
Apium_graveolens_newGene_74	7	11	3	80	138	154	0.157404	0.255323	0.055735	1.96159	3.40398	3.08779	4.48654e-09	4.10703	up
Apium_graveolens_newGene_119	6	0	0	62	32	47	0.137309	0	0	1.60034	0.830723	0.983808	8.28083e-08	4.47884	up
Apium_graveolens_newGene_188	5	9	3	123	594	696	0.071481	0.163174	0.037363	2.58389	12.6495	12.5053	0.000101639	6.33294	up
Apium_graveolens_newGene_189	0	21	0	262	774	857	0	0.447077	0	6.40143	19.074	19.3443	9.06412e-08	6.44026	up
Apium_graveolens_newGene_232	0	16	0	49	53	58	0	0.315392	0	1.01149	1.10148	0.984299	2.04267e-05	3.27844	up
Apium_graveolens_newGene_355	28	751	213	2562	17900	19542	1.21325	31.7738	8.46567	108.882	766.666	678.091	0.0029621	5.30579	up
Apium_graveolens_newGene_552	35	14	17	107	98	146	0.740309	0.285227	0.329358	2.21116	2.50091	2.61338	0.000492331	2.37481	up
Apium_graveolens_newGene_676	6	40	5	103	91	118	0.04974	0.37425	0.036269	0.983106	0.878841	0.922542	0.000209923	2.57434	up
Apium_graveolens_newGene_1019	0	10	2	61	113	81	0	0.113541	0.023161	0.824924	1.43168	1.09121	9.6811e-08	4.40463	up
Apium_graveolens_newGene_1245	33	0	0	71	41	85	1.02088	0	0	2.36789	1.2504	2.36204	0.00160011	2.48362	up
Apium_graveolens_newGene_1263	96	151	122	33	21	42	1.7369	2.63578	1.98234	0.534508	0.342962	0.603258	0.0058543	-1.96755	down
Apium_graveolens_newGene_1298	52	106	152	9	25	29	1.47161	2.86704	4.26948	0.17334	0.675842	0.884225	0.00799444	-2.28962	down
Apium_graveolens_newGene_1457	297	347	512	659	832	944	3.6666	4.1494	5.75974	7.93302	10.1518	9.29828	0.00243764	1.08308	up
Apium_graveolens_newGene_1546	8	1236	527	6259	20024	22747	0.105967	25.628	10.923	105.653	342.193	316.127	6.3104e-05	4.77748	up
Apium_graveolens_newGene_1634	11	4	2	107	57	129	0.369953	0.140574	0.065496	3.82812	2.0466	3.78638	2.90726e-08	4.03783	up
Apium_graveolens_newGene_1724	0	9	0	100	144	165	0	0.262926	0	3.21472	4.50281	4.37025	4.88341e-13	5.45688	up
Apium_graveolens_newGene_1759	0	0	0	65	91	61	0	0	0	1.8964	2.686	1.45341	5.24428e-14	Inf	up
Apium_graveolens_newGene_1852	5	10	10	42	107	98	0.111022	0.197263	0.195585	0.91529	2.34987	1.74519	0.000420466	3.31291	up
Apium_graveolens_newGene_1871	115	49	136	0	23	6	6.1513	2.5128	6.59835	0	1.15858	0.24976	0.000325359	-3.30489	down
Apium_graveolens_newGene_1975	0	0	0	134	205	180	0	0	0	2.42342	3.24577	2.27429	1.85729e-21	Inf	up
Apium_graveolens_newGene_1978	0	0	0	50	35	95	0	0	0	2.81031	1.96318	4.39183	3.46395e-09	Inf	up
Apium_graveolens_newGene_2296	3	0	4	121	92	80	0.102704	0	0.139073	3.52354	2.88127	2.05404	2.84064e-11	5.4269	up
Apium_graveolens_newGene_2327	0	16	10	91	75	80	0	0.519491	0.306539	3.01964	2.48177	2.14695	1.04081e-05	3.25834	up
Apium_graveolens_newGene_2375	2871	2871	3881	1588	1600	1295	24.686	23.9449	30.4229	13.3041	13.502	8.85693	2.9753e-06	-1.08285	down
Apium_graveolens_newGene_2405	19	32	15	126	168	165	0.290782	0.531696	0.229595	2.16047	3.1321	2.14601	1.33873e-05	2.78062	up
Apium_graveolens_newGene_2469	2	3	11	73	117	76	0.028802	0.087089	0.138075	1.23311	1.84793	1.20422	7.85722e-08	4.12804	up
Apium_graveolens_newGene_2488	2	0	0	187	198	268	0.01841	0	0	3.34278	3.56507	3.91337	2.18333e-22	8.26698	up
Apium_graveolens_newGene_2496	352	345	437	854	910	705	5.50624	5.2093	5.62132	12.9328	13.5157	8.5879	0.00122413	1.14003	up
Apium_graveolens_newGene_2761	0	5	0	50	97	90	0	0.184177	0	2.2973	4.49644	3.38634	7.98708e-11	5.52557	up
Apium_graveolens_newGene_3223	0	0	0	46	82	73	0	0	0	0.737052	1.3468	0.964402	1.39614e-13	Inf	up
Apium_graveolens_newGene_3325	174	193	265	33	56	45	4.64656	4.99689	6.44826	0.858145	1.46941	0.952809	0.00013724	-2.21943	down
Apium_graveolens_newGene_3665	5	3	0	45	168	133	0.04743	0.029003	0	0.560466	2.41775	1.43622	0.000255823	5.37863	up
Apium_graveolens_newGene_3667	4	9	7	55	35	40	0.060265	0.166197	0.127773	1.06335	0.669881	0.633405	0.000642147	2.70596	up
Apium_graveolens_newGene_3810	4	3	0	384	230	374	0.120084	0.077722	0	14.8719	8.97221	11.8028	1.67853e-26	7.07076	up
Apium_graveolens_newGene_4022	22	7	15	69	80	53	0.466222	0.127668	0.29204	1.46315	1.71035	0.921859	0.00467387	2.20967	up
Apium_graveolens_newGene_4182	0	633	0	1221	1074	1036	0	17.1318	0	33.1908	29.4209	22.9811	0.000290106	2.36044	up
Apium_graveolens_newGene_4393	128	188	276	0	0	0	2.09577	3.2927	5.24188	0	0	0	5.74994e-21	#NAME?	down
Apium_graveolens_newGene_4400	0	2	0	172	70	130	0	0.042966	0	6.20582	2.5331	3.81571	1.94481e-10	7.48835	up
Apium_graveolens_newGene_4401	0	5	5	75	92	130	0	0.205213	0.192311	4.925	4.6105	6.6551	3.143e-10	4.9065	up
Apium_graveolens_newGene_4402	5	17	3	248	156	345	0.104981	0.544766	0.05098	6.91564	4.51541	8.38263	6.48442e-14	4.84694	up
Apium_graveolens_newGene_4403	180	256	559	3	4	0	2.02675	2.83721	5.41127	0.022786	0.035671	0	3.42967e-07	-7.04294	down
Apium_graveolens_newGene_4421	37	54	57	4701	2034	2442	0.701112	0.849089	0.966646	79.7506	34.2575	32.4781	2.90113e-07	5.96735	up
Apium_graveolens_newGene_4422	0	3	14	391	193	181	0	0.035428	0.22533	6.8629	3.41093	2.58665	2.89329e-06	5.58534	up
Apium_graveolens_newGene_4470	21	916	182	2561	19700	31773	0.857725	38.013	7.07541	106.753	827.635	1081.4	0.00747552	5.53548	up
Apium_graveolens_newGene_4511	23	131	39	2126	1667	1935	0.302173	1.68136	0.46766	27.5617	21.773	20.4819	1.12801e-62	4.8744	up
Apium_graveolens_newGene_4539	0	0	0	35	57	44	0	0	0	0.422583	0.701103	0.43819	8.1721e-12	Inf	up
Apium_graveolens_newGene_4578	199	227	254	0	0	0	2.74452	3.1891	3.14053	0	0	0	2.56231e-25	#NAME?	down
Apium_graveolens_newGene_4580	0	6	0	43	32	77	0	0.194911	0	1.51076	1.12862	2.26751	2.576e-07	4.58623	up
Apium_graveolens_newGene_4791	10	3	1	46	51	46	0.289435	0.056983	0.021415	1.28146	1.46015	1.05886	2.16878e-05	3.30593	up
Apium_graveolens_newGene_4890	30	30	18	93	175	200	0.716021	0.6958	0.397494	2.19537	4.18033	3.87965	5.54642e-05	2.55394	up
Apium_graveolens_newGene_4891	18	17	17	80	55	87	0.660874	0.627659	0.597957	3.01195	2.09554	2.66445	0.00695087	2.0756	up
Apium_graveolens_newGene_5025	114	175	151	26	33	49	4.03744	6.01367	4.89422	0.874429	1.13657	1.38344	0.0022797	-2.04661	down
Apium_graveolens_newGene_5120	9	3	2	34	41	72	0.187426	0.057524	0.03824	0.72104	0.878372	1.24318	1.62841e-05	3.32358	up
Apium_graveolens_newGene_5276	25	57	31	435	206	277	0.365829	0.822132	0.411092	6.39961	3.02383	3.28694	0.000138235	3.01414	up
Apium_graveolens_newGene_5972	52	11	14	117	126	94	1.48201	0.299919	0.340007	3.237	3.51221	2.12822	0.00263162	2.10833	up
Apium_graveolens_newGene_6151	7	5	0	124	75	66	0.188822	0.145723	0	3.76276	2.31007	1.63285	3.75319e-07	4.41985	up
Apium_graveolens_newGene_6321	20	20	47	160	107	128	0.263464	0.255932	0.567664	2.07395	1.39788	1.58581	0.00132812	2.21245	up
Apium_graveolens_newGene_6386	160	183	280	47	47	30	3.15231	3.52185	5.17603	0.909964	0.890855	0.486994	7.65608e-05	-2.29224	down
Apium_graveolens_newGene_6555	27	29	17	390	333	432	0.251208	0.32643	0.140376	4.77393	4.09288	3.76514	2.80644e-15	3.95707	up
Apium_graveolens_newGene_6612	8	5	8	42	130	118	0.097952	0.053478	0.090293	0.521207	1.8961	1.33713	0.000983275	3.78677	up
Apium_graveolens_newGene_6802	23	19	22	510	713	624	0.73256	0.496801	0.574767	15.7186	21.6891	15.5933	9.84616e-28	4.85316	up
Apium_graveolens_newGene_6807	72	61	127	0	0	0	1.11622	0.911883	1.79479	0	0	0	9.50349e-15	#NAME?	down
Apium_graveolens_newGene_6930	59	64	77	0	12	20	1.51394	1.54018	1.72236	0	0.256117	0.403733	0.000468635	-2.68445	down
Apium_graveolens_newGene_7252	227	162	202	77	19	32	5.26331	3.77304	4.32079	1.71308	0.387055	0.550577	0.000231019	-2.20662	down
Apium_graveolens_newGene_7293	323	303	490	54	42	12	8.74967	7.42165	11.9576	1.52383	0.999342	0.289336	8.12206e-12	-3.31251	down
Apium_graveolens_newGene_7302	0	7	7	44	330	303	0	0.030995	0.029034	0.22642	1.71411	1.27574	0.00371451	5.61999	up
Apium_graveolens_newGene_7340	7	49	2	224	1260	1358	0.062551	0.477954	0.018007	2.41647	14.0966	11.8289	0.000800945	5.55994	up
Apium_graveolens_newGene_7707	233	190	190	1857	1119	1198	1.45546	1.15165	1.08397	11.3332	6.87723	5.96731	1.31774e-06	2.76501	up
Apium_graveolens_newGene_8068	130	79	109	27	17	22	3.93022	3.05323	3.01912	0.862571	0.59384	0.525243	0.00136019	-2.27577	down
Apium_graveolens_newGene_8094	0	0	0	243	310	313	0	0	0	3.52021	5.31171	3.81394	9.836e-30	Inf	up
Apium_graveolens_newGene_8191	2	9	2	65	68	135	0.05048	0.33924	0.046745	2.72217	2.8896	4.64598	2.18637e-08	4.30938	up
Apium_graveolens_newGene_8368	0	0	7	295	102	109	0	0	0.140456	6.76372	2.35548	2.03633	0.000794585	6.29661	up
Apium_graveolens_newGene_8389	4	99	29	259	1640	1621	0.058824	1.89972	0.453451	4.49856	29.9471	26.0681	0.00620464	4.71584	up
Apium_graveolens_newGene_8449	13	10	8	327	237	440	0.449448	0.307112	0.253398	11.1602	8.16984	12.2743	9.03503e-19	4.97795	up
Apium_graveolens_newGene_8608	8	5	19	68	127	97	0.096096	0.052798	0.230045	0.887735	1.68003	1.03247	7.68295e-06	3.23628	up
Apium_graveolens_newGene_8612	0	12	0	84	182	147	0	0.216345	0	1.55938	3.45159	2.2623	3.28976e-08	5.06996	up
Apium_graveolens_newGene_8726	0	0	6	41	35	57	0	0	0.118868	1.17792	1.18359	1.49596	1.33861e-07	4.55871	up
Apium_graveolens_newGene_9037	3	8	13	251	300	419	0.011878	0.040279	0.066339	1.79128	2.20891	2.40821	9.11871e-20	5.35408	up
Apium_graveolens_newGene_9066	12	31	8	844	520	659	0.307884	0.734609	0.162872	21.5613	13.5546	13.7386	3.9175e-23	5.28266	up
Apium_graveolens_newGene_9209	8	4	4	81	265	153	0.23737	0.106579	0.120286	2.60762	10.3977	4.04123	0.00132188	4.96214	up
Apium_graveolens_newGene_9466	300	888	285	0	0	0	5.59559	16.0791	4.85426	0	0	0	3.00743e-06	#NAME?	down
Apium_graveolens_newGene_9472	65	47	27	260	465	423	1.78854	0.923188	0.775481	5.98599	10.7157	9.22926	7.79208e-08	3.01941	up
Apium_graveolens_newGene_9493	12	5	2	46	38	78	0.531564	0.174589	0.081008	2.33388	1.80864	3.44742	6.6204e-05	3.01669	up
Apium_graveolens_newGene_9540	82	80	126	27	13	0	2.20919	2.02391	2.98634	0.644737	0.290735	0	6.3104e-05	-2.77703	down
Apium_graveolens_newGene_9618	0	21	0	92	378	240	0	0.313807	0	1.19619	5.43993	2.81467	0.00250351	5.0534	up
Apium_graveolens_newGene_9620	0	26	7	446	634	578	0	0.760003	0.194055	13.3905	19.1835	14.1684	1.16987e-30	5.64327	up
Apium_graveolens_newGene_10135	19	13	25	893	511	325	0.245173	0.153703	0.28707	13.4198	7.31023	3.85148	7.74552e-05	4.95912	up
Apium_graveolens_newGene_10236	43	66	66	966	1277	950	0.330064	0.494566	0.472689	7.58943	9.98222	6.01722	3.09461e-18	4.2079	up
Apium_graveolens_newGene_10440	51	47	45	148	217	125	0.376789	0.297581	0.380588	1.29954	1.83785	0.76149	0.0072559	1.79268	up
Apium_graveolens_newGene_10626	0	0	0	91	204	150	0	0	0	1.80689	4.25033	2.52894	6.38879e-12	Inf	up
Apium_graveolens_newGene_10642	62	32	37	11	0	0	1.5265	0.645161	0.779739	0.221346	0	0	0.000248271	-3.55231	down
Apium_graveolens_newGene_10670	26	14	0	84	53	72	0.554577	0.286445	0	1.78054	1.12156	1.24214	0.00174264	2.32008	up
Apium_graveolens_newGene_10671	77	46	9	233	208	195	0.821855	0.466232	0.080564	2.74468	2.19692	1.67668	0.00010531	2.22605	up
Apium_graveolens_newGene_10770	85	0	0	359	375	321	1.91712	0	0	7.80832	7.91878	5.62211	8.76297e-13	3.57143	up
Apium_graveolens_newGene_10816	526	497	711	317	261	232	5.83671	5.35606	7.20292	3.42575	2.8429	2.05061	0.00842591	-1.07999	down
Apium_graveolens_newGene_10839	81	31	72	241	157	249	0.775113	0.254822	0.617405	1.81842	1.39613	1.53046	0.00245841	1.8029	up
Apium_graveolens_newGene_10968	320	323	62	1026	877	1084	6.16725	5.22725	0.900446	17.6166	16.2123	15.5737	2.01263e-11	2.03538	up
Apium_graveolens_newGene_10998	0	5	0	85	147	109	0	0.084188	0	1.759	3.08547	1.84669	5.40829e-13	6.06219	up
Apium_graveolens_newGene_11258	3	2	0	43	133	169	0.154269	0.098513	0	2.15943	6.82629	7.04698	1.08293e-05	6.02835	up
Apium_graveolens_newGene_11290	7	37	10	52	86	134	0.312848	1.65762	0.411046	2.36326	3.96101	4.98355	0.00529768	2.28771	up
Apium_graveolens_newGene_11459	43	94	43	218	282	365	0.860994	1.84697	0.789357	4.31446	5.61539	5.90435	1.66532e-05	2.23709	up
Apium_graveolens_newGene_11551	357	279	325	581	745	840	5.69893	5.38162	5.12337	6.60489	8.44034	7.74657	0.00145335	1.16204	up
Apium_graveolens_newGene_11555	9	16	5	109	186	165	0.174428	0.320075	0.080441	2.3243	4.04095	2.85671	3.2718e-09	3.91494	up
Apium_graveolens_newGene_11673	0	0	0	88	139	63	0	0	0	2.62095	4.167	1.52741	4.25796e-09	Inf	up
Apium_graveolens_newGene_11734	0	0	0	40	88	105	0	0	0	0.348304	0.769801	0.745135	6.72517e-11	Inf	up
Apium_graveolens_newGene_11973	0	9	3	36	132	115	0	0.131698	0.030919	0.580603	2.18027	1.5347	0.000956696	4.55325	up
Apium_graveolens_newGene_11975	329	365	458	1571	2861	3222	5.94759	7.40314	7.98089	33.0727	56.8849	56.2663	1.37839e-06	2.72926	up
Apium_graveolens_newGene_12018	329	333	413	114	113	60	3.89556	3.7852	5.14979	1.46763	1.33442	0.671396	8.0591e-05	-1.87311	down
Apium_graveolens_newGene_12044	305	385	591	120	145	139	4.15007	5.20237	7.09758	1.79692	2.19451	1.72403	0.000247747	-1.64459	down
Apium_graveolens_newGene_12045	206	154	389	0	0	0	3.56242	2.67541	7.05542	0	0	0	1.43022e-13	#NAME?	down
Apium_graveolens_newGene_12089	189	185	182	119	0	0	4.63888	4.39029	4.06741	2.83545	0	0	0.0017267	-2.19183	down
Apium_graveolens_newGene_12110	27	8	21	1039	596	679	0.645878	0.175261	0.470461	25.1341	14.5291	13.3997	6.30445e-14	5.37073	up
Apium_graveolens_newGene_12291	64	68	118	13	4	11	2.52161	2.75892	4.53259	0.544548	0.110981	0.338597	1.55226e-05	-3.16011	down
Apium_graveolens_newGene_12316	69	39	0	189	195	148	1.75852	0.763033	0	4.70639	5.17316	3.43064	0.000199077	2.25424	up
Apium_graveolens_newGene_12459	17	11	1	60	44	56	0.247131	0.142386	0.012792	0.849629	0.623044	0.648591	0.00167121	2.4058	up
Apium_graveolens_newGene_12679	2	26	23	189	218	153	0.047031	0.62752	0.488652	4.80707	5.65445	3.25145	2.20154e-08	3.49606	up
Apium_graveolens_newGene_13161	0	2	2	47	87	79	0	0.04954	0.017442	1.26917	1.9371	1.50739	9.78995e-11	5.76697	up
Apium_graveolens_newGene_13272	58	93	128	27	34	8	1.81432	2.82382	3.63798	0.688819	1.00096	0.166893	0.00693027	-1.9475	down
Apium_graveolens_newGene_13273	177	178	400	74	25	35	3.94657	4.43493	11.1482	2.03962	0.567059	0.820279	0.00487679	-2.46107	down
Apium_graveolens_newGene_13321	0	0	0	32	53	51	0	0	0	0.644469	1.09638	0.8417	7.99613e-12	Inf	up
