# Supplementary material for: Transcriptomic and Proteomic Analyses of Celery Cytoplasmic Male Sterile Line and Its Maintainer Line
Source: Int J Mol Sci. 2023 Feb 20;24(4):4194. doi: 10.3390/ijms24044194 (PMC9967367; doi:10.3390/ijms24044194)
Supplement: Supplementary file 1 [file ijms-24-04194-s001.zip › Table S3.xlsx]

## Sheet: Biological Process (BP)
Table S3. TopGO enrichment result file of differentially expressed genes (BP)
GO.ID	Term	Annotated	Significant	Expected	KS
GO:0080110	sporopollenin biosynthetic process	5	5	0.17	7e-05
GO:0032012	regulation of ARF protein signal transduction	7	3	0.23	0.00014
GO:0001522	pseudouridine synthesis	17	1	0.57	0.00038
GO:0048577	negative regulation of short-day photoperiodism, flowering	4	0	0.13	0.00094
GO:0009299	mRNA transcription	4	0	0.13	0.00094
GO:0010584	pollen exine formation	14	9	0.47	0.00251
GO:0006813	potassium ion transport	65	7	2.17	0.00256
GO:0019288	isopentenyl diphosphate biosynthetic process, methylerythritol 4-phosphate pathway	5	0	0.17	0.00293
GO:0048544	recognition of pollen	17	0	0.57	0.00404
GO:0048579	negative regulation of long-day photoperiodism, flowering	5	0	0.17	0.00459
GO:0006558	L-phenylalanine metabolic process	11	2	0.37	0.00505
GO:0072330	monocarboxylic acid biosynthetic process	148	13	4.94	0.00531
GO:1901606	alpha-amino acid catabolic process	36	2	1.2	0.00616
GO:0006631	fatty acid metabolic process	168	15	5.61	0.00624
GO:0006570	tyrosine metabolic process	3	0	0.1	0.00693
GO:0006414	translational elongation	64	6	2.14	0.00788
GO:0061512	protein localization to cilium	11	0	0.37	0.00845
GO:0046323	glucose import	26	6	0.87	0.00907
GO:0009611	response to wounding	25	2	0.83	0.01037
GO:0006559	L-phenylalanine catabolic process	7	1	0.23	0.01089
GO:1902222	erythrose 4-phosphate/phosphoenolpyruvate family amino acid catabolic process	7	1	0.23	0.01089
GO:1901658	glycosyl compound catabolic process	47	4	1.57	0.01107
GO:0055085	transmembrane transport	999	66	33.36	0.01232
GO:0015749	monosaccharide transport	35	8	1.17	0.01279
GO:0016246	RNA interference	7	0	0.23	0.01298
GO:0015758	glucose transport	31	8	1.04	0.01387
GO:0008645	hexose transport	33	8	1.1	0.01394
GO:0009164	nucleoside catabolic process	46	4	1.54	0.01413
GO:0043549	regulation of kinase activity	55	1	1.84	0.01478
GO:0042908	xenobiotic transport	6	0	0.2	0.01639
GO:0051338	regulation of transferase activity	58	1	1.94	0.01734
GO:0042454	ribonucleoside catabolic process	45	4	1.5	0.01799
GO:0006012	galactose metabolic process	14	2	0.47	0.01836
GO:0071804	cellular potassium ion transport	46	4	1.54	0.0186
GO:0071805	potassium ion transmembrane transport	46	4	1.54	0.0186
GO:0009306	protein secretion	10	1	0.33	0.01885
GO:0018108	peptidyl-tyrosine phosphorylation	19	1	0.63	0.01928
GO:0018212	peptidyl-tyrosine modification	19	1	0.63	0.01928
GO:0005996	monosaccharide metabolic process	151	9	5.04	0.01952
GO:0030638	polyketide metabolic process	2	2	0.07	0.02029
GO:0030639	polyketide biosynthetic process	2	2	0.07	0.02029
GO:0000070	mitotic sister chromatid segregation	5	0	0.17	0.02047
GO:0019318	hexose metabolic process	78	6	2.6	0.02091
GO:0045859	regulation of protein kinase activity	53	1	1.77	0.02159
GO:0000455	enzyme-directed rRNA pseudouridine synthesis	5	1	0.17	0.02211
GO:0000079	regulation of cyclin-dependent protein serine/threonine kinase activity	18	0	0.6	0.02247
GO:0006152	purine nucleoside catabolic process	44	4	1.47	0.02284
GO:0031119	tRNA pseudouridine synthesis	3	0	0.1	0.02383
GO:0034219	carbohydrate transmembrane transport	36	8	1.2	0.02401
GO:0035428	hexose transmembrane transport	17	5	0.57	0.02415
GO:0072348	sulfur compound transport	20	1	0.67	0.0246
GO:0045037	protein import into chloroplast stroma	10	2	0.33	0.02463
GO:0006633	fatty acid biosynthetic process	110	10	3.67	0.02499
GO:0046434	organophosphate catabolic process	57	3	1.9	0.02569
GO:0035725	sodium ion transmembrane transport	7	1	0.23	0.02755
GO:0031507	heterochromatin assembly	5	0	0.17	0.02802
GO:0070828	heterochromatin organization	5	0	0.17	0.02802
GO:0043085	positive regulation of catalytic activity	81	4	2.7	0.02839
GO:0046130	purine ribonucleoside catabolic process	43	4	1.44	0.02891
GO:0006527	arginine catabolic process	5	0	0.17	0.02926
GO:0043069	negative regulation of programmed cell death	5	0	0.17	0.02957
GO:0007064	mitotic sister chromatid cohesion	4	0	0.13	0.0299
GO:0034389	lipid particle organization	2	1	0.07	0.03013
GO:0032101	regulation of response to external stimulus	8	1	0.27	0.03018
GO:0031118	rRNA pseudouridine synthesis	8	1	0.27	0.03066
GO:0000463	maturation of LSU-rRNA from tricistronic rRNA transcript (SSU-rRNA, 5.8S rRNA, LSU-rRNA)	16	1	0.53	0.03083
GO:0010675	regulation of cellular carbohydrate metabolic process	4	0	0.13	0.0309
GO:0000448	cleavage in ITS2 between 5.8S rRNA and LSU-rRNA of tricistronic rRNA transcript (SSU-rRNA, 5.8S rRNA, LSU-rRNA)	2	1	0.07	0.03105
GO:0008272	sulfate transport	18	1	0.6	0.03152
GO:0036260	RNA capping	6	0	0.2	0.03168
GO:0009452	7-methylguanosine RNA capping	6	0	0.2	0.03168
GO:0016925	protein sumoylation	12	0	0.4	0.03192
GO:0030422	production of siRNA involved in RNA interference	6	0	0.2	0.03297
GO:0034976	response to endoplasmic reticulum stress	24	2	0.8	0.03313
GO:0046886	positive regulation of hormone biosynthetic process	2	0	0.07	0.03316
GO:0005975	carbohydrate metabolic process	834	40	27.85	0.03364
GO:0010817	regulation of hormone levels	82	7	2.74	0.03386
GO:0045860	positive regulation of protein kinase activity	26	1	0.87	0.03409
GO:0051347	positive regulation of transferase activity	30	1	1	0.03441
GO:0060918	auxin transport	28	3	0.93	0.03467
GO:0009914	hormone transport	28	3	0.93	0.03467
GO:0044093	positive regulation of molecular function	83	4	2.77	0.0359
GO:0006572	tyrosine catabolic process	2	0	0.07	0.03635
GO:2000904	regulation of starch metabolic process	2	0	0.07	0.03663
GO:0009926	auxin polar transport	23	3	0.77	0.03838
GO:2000012	regulation of auxin polar transport	2	0	0.07	0.03902
GO:0009617	response to bacterium	69	7	2.3	0.03918
GO:0051784	negative regulation of nuclear division	6	0	0.2	0.03964
GO:1901292	nucleoside phosphate catabolic process	45	3	1.5	0.04012
GO:0010214	seed coat development	4	2	0.13	0.04082
GO:0006083	acetate metabolic process	8	1	0.27	0.04115
GO:1902022	L-lysine transport	2	1	0.07	0.04116
GO:0015819	lysine transport	2	1	0.07	0.04116
GO:1903401	L-lysine transmembrane transport	2	1	0.07	0.04116
GO:0006596	polyamine biosynthetic process	23	2	0.77	0.04202
GO:0022610	biological adhesion	7	1	0.23	0.04432
GO:0007155	cell adhesion	7	1	0.23	0.04432
GO:0043248	proteasome assembly	13	0	0.43	0.04461
GO:0000578	embryonic axis specification	3	0	0.1	0.04503
GO:1902531	regulation of intracellular signal transduction	28	4	0.93	0.04522
GO:0097035	regulation of membrane lipid distribution	10	1	0.33	0.04558
GO:0006779	porphyrin-containing compound biosynthetic process	41	0	1.37	0.04667
GO:0019220	regulation of phosphate metabolic process	131	5	4.37	0.04709
GO:0051174	regulation of phosphorus metabolic process	131	5	4.37	0.04709
GO:0048589	developmental growth	56	2	1.87	0.04718
GO:0010163	high-affinity potassium ion import	2	0	0.07	0.04727
GO:0019252	starch biosynthetic process	18	1	0.6	0.0475
GO:0001932	regulation of protein phosphorylation	56	1	1.87	0.04753
GO:0010143	cutin biosynthetic process	17	4	0.57	0.04765
GO:0051171	regulation of nitrogen compound metabolic process	717	23	23.94	0.04789
GO:0006595	polyamine metabolic process	26	2	0.87	0.04907
GO:0080090	regulation of primary metabolic process	876	25	29.25	0.04911
GO:0009166	nucleotide catabolic process	44	3	1.47	0.05006
GO:0019427	acetyl-CoA biosynthetic process from acetate	5	0	0.17	0.05044
GO:0016114	terpenoid biosynthetic process	48	1	1.6	0.05189
GO:0009292	genetic transfer	5	0	0.17	0.05217
GO:0009294	DNA mediated transformation	5	0	0.17	0.05217
GO:0043408	regulation of MAPK cascade	20	1	0.67	0.05258
GO:0032957	inositol trisphosphate metabolic process	3	0	0.1	0.05276
GO:0031401	positive regulation of protein modification process	35	1	1.17	0.05351
GO:0019219	regulation of nucleobase-containing compound metabolic process	707	23	23.61	0.05355
GO:0043648	dicarboxylic acid metabolic process	105	5	3.51	0.05373
GO:0051252	regulation of RNA metabolic process	655	20	21.87	0.05425
GO:0006355	regulation of transcription, DNA-templated	637	20	21.27	0.05479
GO:0034051	negative regulation of plant-type hypersensitive response	2	0	0.07	0.05499
GO:0010468	regulation of gene expression	805	21	26.88	0.05503
GO:0033674	positive regulation of kinase activity	28	1	0.93	0.05522
GO:0030091	protein repair	22	1	0.73	0.05557
GO:0045036	protein targeting to chloroplast	12	2	0.4	0.05558
GO:0072596	establishment of protein localization to chloroplast	12	2	0.4	0.05558
GO:0072598	protein localization to chloroplast	12	2	0.4	0.05558
GO:0000819	sister chromatid segregation	6	0	0.2	0.0559
GO:0042325	regulation of phosphorylation	59	1	1.97	0.05678
GO:0009734	auxin-activated signaling pathway	53	1	1.77	0.05678
GO:0071365	cellular response to auxin stimulus	53	1	1.77	0.05678
GO:0006047	UDP-N-acetylglucosamine metabolic process	9	0	0.3	0.05694
GO:0030811	regulation of nucleotide catabolic process	40	3	1.34	0.05741
GO:0033121	regulation of purine nucleotide catabolic process	40	3	1.34	0.05741
GO:0009154	purine ribonucleotide catabolic process	40	3	1.34	0.05741
GO:0009261	ribonucleotide catabolic process	40	3	1.34	0.05741
GO:0009203	ribonucleoside triphosphate catabolic process	40	3	1.34	0.05741
GO:0009207	purine ribonucleoside triphosphate catabolic process	40	3	1.34	0.05741
GO:0010030	positive regulation of seed germination	5	2	0.17	0.05752
GO:2000241	regulation of reproductive process	38	0	1.27	0.05772
GO:0002238	response to molecule of fungal origin	5	0	0.17	0.05786
GO:0010562	positive regulation of phosphorus metabolic process	30	1	1	0.05889
GO:0001934	positive regulation of protein phosphorylation	30	1	1	0.05889
GO:0042327	positive regulation of phosphorylation	30	1	1	0.05889
GO:0045937	positive regulation of phosphate metabolic process	30	1	1	0.05889
GO:0015695	organic cation transport	8	1	0.27	0.05939
GO:0046949	fatty-acyl-CoA biosynthetic process	4	2	0.13	0.05967
GO:0033539	fatty acid beta-oxidation using acyl-CoA dehydrogenase	15	0	0.5	0.05995
GO:0043067	regulation of programmed cell death	8	0	0.27	0.06075
GO:0060255	regulation of macromolecule metabolic process	896	24	29.92	0.06118
GO:0009143	nucleoside triphosphate catabolic process	43	3	1.44	0.06222
GO:0051336	regulation of hydrolase activity	85	5	2.84	0.0631
GO:0042726	flavin-containing compound metabolic process	9	0	0.3	0.06311
GO:0030968	endoplasmic reticulum unfolded protein response	9	1	0.3	0.06352
GO:0034620	cellular response to unfolded protein	9	1	0.3	0.06352
GO:0035967	cellular response to topologically incorrect protein	9	1	0.3	0.06352
GO:0032147	activation of protein kinase activity	17	1	0.57	0.0646
GO:0015908	fatty acid transport	4	1	0.13	0.0646
GO:2001141	regulation of RNA biosynthetic process	639	20	21.34	0.06495
GO:0033124	obsolete regulation of GTP catabolic process	36	3	1.2	0.06557
GO:1901069	guanosine-containing compound catabolic process	36	3	1.2	0.06557
GO:0006184	obsolete GTP catabolic process	36	3	1.2	0.06557
GO:0043087	regulation of GTPase activity	36	3	1.2	0.06557
GO:0006420	arginyl-tRNA aminoacylation	2	0	0.07	0.06572
GO:1900912	negative regulation of olefin biosynthetic process	2	0	0.07	0.06575
GO:1900909	negative regulation of olefin metabolic process	2	0	0.07	0.06575
GO:0033239	negative regulation of cellular amine metabolic process	2	0	0.07	0.06575
GO:0045763	negative regulation of cellular amino acid metabolic process	2	0	0.07	0.06575
GO:0010366	negative regulation of ethylene biosynthetic process	2	0	0.07	0.06575
GO:0031336	negative regulation of sulfur amino acid metabolic process	2	0	0.07	0.06575
GO:0051175	negative regulation of sulfur metabolic process	2	0	0.07	0.06575
GO:1902644	tertiary alcohol metabolic process	7	1	0.23	0.06581
GO:1902645	tertiary alcohol biosynthetic process	7	1	0.23	0.06581
GO:0009687	abscisic acid metabolic process	7	1	0.23	0.06581
GO:0009688	abscisic acid biosynthetic process	7	1	0.23	0.06581
GO:0048467	gynoecium development	20	2	0.67	0.06709
GO:0030261	chromosome condensation	4	0	0.13	0.06711
GO:0009083	branched-chain amino acid catabolic process	5	0	0.17	0.06753
GO:0006517	protein deglycosylation	3	0	0.1	0.06772
GO:0008643	carbohydrate transport	109	19	3.64	0.0681
GO:0046417	chorismate metabolic process	13	2	0.43	0.06814
GO:0031399	regulation of protein modification process	73	1	2.44	0.0689
GO:0006014	D-ribose metabolic process	9	2	0.3	0.0693
GO:0055088	lipid homeostasis	44	2	1.47	0.06944
GO:1900864	mitochondrial RNA modification	2	0	0.07	0.0698
GO:0043900	regulation of multi-organism process	9	1	0.3	0.06995
GO:0042742	defense response to bacterium	59	4	1.97	0.07041
GO:0071900	regulation of protein serine/threonine kinase activity	26	1	0.87	0.07068
GO:0051123	RNA polymerase II transcriptional preinitiation complex assembly	12	1	0.4	0.07089
GO:0070897	DNA-templated transcriptional preinitiation complex assembly	12	1	0.4	0.07089
GO:0007062	sister chromatid cohesion	5	0	0.17	0.07242
GO:0002831	regulation of response to biotic stimulus	7	1	0.23	0.07332
GO:0019310	inositol catabolic process	4	1	0.13	0.07336
GO:0042335	cuticle development	10	0	0.33	0.07384
GO:0045737	positive regulation of cyclin-dependent protein serine/threonine kinase activity	9	0	0.3	0.07416
GO:1901407	regulation of phosphorylation of RNA polymerase II C-terminal domain	9	0	0.3	0.07416
GO:1901409	positive regulation of phosphorylation of RNA polymerase II C-terminal domain	9	0	0.3	0.07416
GO:0006109	regulation of carbohydrate metabolic process	5	0	0.17	0.07476
GO:0071446	cellular response to salicylic acid stimulus	8	0	0.27	0.07605
GO:0031326	regulation of cellular biosynthetic process	733	20	24.48	0.07669
GO:0016070	RNA metabolic process	1661	39	55.46	0.07694
GO:0034754	cellular hormone metabolic process	19	2	0.63	0.07856
GO:0006312	mitotic recombination	10	0	0.33	0.07936
GO:0009445	putrescine metabolic process	2	0	0.07	0.07965
GO:0009446	putrescine biosynthetic process	2	0	0.07	0.07965
GO:0009889	regulation of biosynthetic process	734	20	24.51	0.08121
GO:0009074	aromatic amino acid family catabolic process	10	1	0.33	0.08169
GO:0000186	activation of MAPKK activity	14	0	0.47	0.0818
GO:0045332	phospholipid translocation	8	1	0.27	0.08456
GO:0034204	lipid translocation	8	1	0.27	0.08456
GO:0031347	regulation of defense response	24	2	0.8	0.08526
GO:0044282	small molecule catabolic process	120	8	4.01	0.08539
GO:0031329	regulation of cellular catabolic process	67	3	2.24	0.08597
GO:0071310	cellular response to organic substance	224	11	7.48	0.08655
GO:0033611	oxalate catabolic process	3	2	0.1	0.08728
GO:0031407	oxylipin metabolic process	11	4	0.37	0.08773
GO:0031408	oxylipin biosynthetic process	11	4	0.37	0.08773
GO:0006006	glucose metabolic process	60	4	2	0.08854
GO:0000911	cytokinesis by cell plate formation	23	0	0.77	0.0887
GO:1902410	mitotic cytokinetic process	23	0	0.77	0.0887
GO:0000281	mitotic cytokinesis	23	0	0.77	0.0887
GO:0031086	nuclear-transcribed mRNA catabolic process, deadenylation-independent decay	3	0	0.1	0.09045
GO:0031087	deadenylation-independent decapping of nuclear-transcribed mRNA	3	0	0.1	0.09045
GO:2000112	regulation of cellular macromolecule biosynthetic process	718	20	23.98	0.09069
GO:1901068	guanosine-containing compound metabolic process	50	3	1.67	0.09149
GO:0070816	phosphorylation of RNA polymerase II C-terminal domain	11	0	0.37	0.09153
GO:1901642	nucleoside transmembrane transport	5	2	0.17	0.09318
GO:0009226	nucleotide-sugar biosynthetic process	14	1	0.47	0.09384
GO:0030497	fatty acid elongation	2	0	0.07	0.09388
GO:0009590	detection of gravity	3	0	0.1	0.09459
GO:0006195	purine nucleotide catabolic process	41	3	1.37	0.09492
GO:0006140	regulation of nucleotide metabolic process	41	3	1.37	0.09492
GO:1900542	regulation of purine nucleotide metabolic process	41	3	1.37	0.09492
GO:0009118	regulation of nucleoside metabolic process	41	3	1.37	0.09492
GO:0009146	purine nucleoside triphosphate catabolic process	41	3	1.37	0.09492
GO:0050992	dimethylallyl diphosphate biosynthetic process	2	0	0.07	0.09699
GO:0050993	dimethylallyl diphosphate metabolic process	2	0	0.07	0.09699
GO:0006810	transport	2205	110	73.63	0.09749
GO:0051346	negative regulation of hydrolase activity	14	1	0.47	0.09789
GO:0009423	chorismate biosynthetic process	10	1	0.33	0.09803
GO:0048832	specification of plant organ number	2	1	0.07	0.09807
GO:0048833	specification of floral organ number	2	1	0.07	0.09807
GO:0009607	response to biotic stimulus	167	10	5.58	0.09809
GO:0051246	regulation of protein metabolic process	178	2	5.94	0.09834
GO:0008033	tRNA processing	88	0	2.94	0.09925
GO:0031327	negative regulation of cellular biosynthetic process	68	2	2.27	0.09981
GO:0098507	polynucleotide 5' dephosphorylation	4	0	0.13	0.10015
GO:0006370	7-methylguanosine mRNA capping	4	0	0.13	0.10015
GO:0010556	regulation of macromolecule biosynthetic process	720	20	24.04	0.10132
GO:0015804	neutral amino acid transport	3	1	0.1	0.10194
GO:0015718	monocarboxylic acid transport	13	3	0.43	0.10198
GO:0002221	pattern recognition receptor signaling pathway	4	1	0.13	0.10232
GO:0002764	immune response-regulating signaling pathway	4	1	0.13	0.10232
GO:0002757	immune response-activating signal transduction	4	1	0.13	0.10232
GO:0002758	innate immune response-activating signal transduction	4	1	0.13	0.10232
GO:0032268	regulation of cellular protein metabolic process	164	1	5.48	0.10236
GO:0043547	positive regulation of GTPase activity	34	3	1.14	0.10241
GO:0016106	sesquiterpenoid biosynthetic process	9	1	0.3	0.10404
GO:0006714	sesquiterpenoid metabolic process	9	1	0.3	0.10404
GO:0043155	negative regulation of photosynthesis, light reaction	9	0	0.3	0.10431
GO:0010205	photoinhibition	9	0	0.3	0.10431
GO:0000919	cell plate assembly	8	0	0.27	0.10455
GO:0009863	salicylic acid mediated signaling pathway	7	0	0.23	0.10496
GO:0006498	N-terminal protein lipidation	3	1	0.1	0.10555
GO:0006499	N-terminal protein myristoylation	3	1	0.1	0.10555
GO:0018377	protein myristoylation	3	1	0.1	0.10555
GO:0016233	telomere capping	6	0	0.2	0.10564
GO:0042148	strand invasion	9	0	0.3	0.10572
GO:0045003	double-strand break repair via synthesis-dependent strand annealing	9	0	0.3	0.10572
GO:0000730	DNA recombinase assembly	9	0	0.3	0.10572
GO:0090603	sieve element differentiation	2	1	0.07	0.10631
GO:0010088	phloem development	2	1	0.07	0.10631
GO:0015871	choline transport	2	1	0.07	0.10631
GO:0009816	defense response to bacterium, incompatible interaction	4	1	0.13	0.10636
GO:0046087	cytidine metabolic process	2	0	0.07	0.10738
GO:0009972	cytidine deamination	2	0	0.07	0.10738
GO:0046133	pyrimidine ribonucleoside catabolic process	2	0	0.07	0.10738
GO:0046135	pyrimidine nucleoside catabolic process	2	0	0.07	0.10738
GO:0006216	cytidine catabolic process	2	0	0.07	0.10738
GO:0051704	multi-organism process	216	11	7.21	0.10798
GO:0080186	developmental vegetative growth	4	1	0.13	0.10815
GO:0071616	acyl-CoA biosynthetic process	17	2	0.57	0.10876
GO:0035384	thioester biosynthetic process	17	2	0.57	0.10876
GO:0046500	S-adenosylmethionine metabolic process	12	0	0.4	0.10946
GO:0009861	jasmonic acid and ethylene-dependent systemic resistance	2	0	0.07	0.10964
GO:0031324	negative regulation of cellular metabolic process	95	2	3.17	0.1097
GO:0034655	nucleobase-containing compound catabolic process	110	4	3.67	0.10971
GO:0006013	mannose metabolic process	5	0	0.17	0.10992
GO:0051234	establishment of localization	2219	110	74.1	0.11008
GO:0048438	floral whorl development	33	3	1.1	0.11122
GO:0071407	cellular response to organic cyclic compound	45	2	1.5	0.11131
GO:0009065	glutamine family amino acid catabolic process	6	0	0.2	0.11149
GO:0044765	single-organism transport	1600	92	53.43	0.11202
GO:0000373	Group II intron splicing	5	0	0.17	0.11233
GO:0043288	apocarotenoid metabolic process	8	1	0.27	0.11263
GO:0043289	apocarotenoid biosynthetic process	8	1	0.27	0.11263
GO:0000304	response to singlet oxygen	3	0	0.1	0.11303
GO:0042445	hormone metabolic process	57	4	1.9	0.11419
GO:0098501	polynucleotide dephosphorylation	7	0	0.23	0.11445
GO:1901136	carbohydrate derivative catabolic process	75	4	2.5	0.11495
GO:0006869	lipid transport	42	2	1.4	0.11595
GO:0010025	wax biosynthetic process	6	1	0.2	0.11609
GO:0010166	wax metabolic process	6	1	0.2	0.11609
GO:0046039	GTP metabolic process	40	3	1.34	0.11642
GO:0051345	positive regulation of hydrolase activity	40	3	1.34	0.11642
GO:0055129	L-proline biosynthetic process	2	0	0.07	0.11715
GO:0048213	Golgi vesicle prefusion complex stabilization	2	0	0.07	0.11726
GO:0048653	anther development	7	1	0.23	0.11812
GO:0010600	regulation of auxin biosynthetic process	2	0	0.07	0.11846
GO:0010930	negative regulation of auxin mediated signaling pathway	2	0	0.07	0.11846
GO:0031848	protection from non-homologous end joining at telomere	4	0	0.13	0.11872
GO:0043247	telomere maintenance in response to DNA damage	4	0	0.13	0.11872
GO:0008610	lipid biosynthetic process	290	15	9.68	0.11913
GO:0006493	protein O-linked glycosylation	4	0	0.13	0.11968
GO:0035268	protein mannosylation	4	0	0.13	0.11968
GO:0019544	arginine catabolic process to glutamate	3	0	0.1	0.12021
GO:0072529	pyrimidine-containing compound catabolic process	4	0	0.13	0.12088
GO:0048582	positive regulation of post-embryonic development	19	2	0.63	0.12096
GO:0051240	positive regulation of multicellular organismal process	19	2	0.63	0.12096
GO:0080134	regulation of response to stress	36	4	1.2	0.12195
GO:0009894	regulation of catabolic process	68	3	2.27	0.12221
GO:0006367	transcription initiation from RNA polymerase II promoter	22	1	0.73	0.12245
GO:0000710	meiotic mismatch repair	3	0	0.1	0.12312
GO:0009211	pyrimidine deoxyribonucleoside triphosphate metabolic process	2	0	0.07	0.12315
GO:0006768	biotin metabolic process	2	0	0.07	0.1238
GO:0009102	biotin biosynthetic process	2	0	0.07	0.1238
GO:0098542	defense response to other organism	124	9	4.14	0.12657
GO:0006357	regulation of transcription from RNA polymerase II promoter	98	4	3.27	0.12704
GO:0009890	negative regulation of biosynthetic process	69	2	2.3	0.12706
GO:0016054	organic acid catabolic process	94	5	3.14	0.12722
GO:0046395	carboxylic acid catabolic process	94	5	3.14	0.12722
GO:0032102	negative regulation of response to external stimulus	2	0	0.07	0.12743
GO:0002832	negative regulation of response to biotic stimulus	2	0	0.07	0.12743
GO:0043901	negative regulation of multi-organism process	2	0	0.07	0.12743
GO:0009800	cinnamic acid biosynthetic process	5	1	0.17	0.12748
GO:0009803	cinnamic acid metabolic process	5	1	0.17	0.12748
GO:0009298	GDP-mannose biosynthetic process	3	1	0.1	0.12769
GO:0000495	box H/ACA snoRNA 3'-end processing	2	0	0.07	0.12821
GO:0033979	box H/ACA snoRNA metabolic process	2	0	0.07	0.12821
GO:0034964	box H/ACA snoRNA processing	2	0	0.07	0.12821
GO:0042727	flavin-containing compound biosynthetic process	7	0	0.23	0.12926
GO:0006771	riboflavin metabolic process	7	0	0.23	0.12926
GO:0009231	riboflavin biosynthetic process	7	0	0.23	0.12926
GO:0031577	spindle checkpoint	5	0	0.17	0.12969
GO:0007094	mitotic spindle assembly checkpoint	5	0	0.17	0.12969
GO:0045841	negative regulation of mitotic metaphase/anaphase transition	5	0	0.17	0.12969
GO:0045839	negative regulation of mitotic nuclear division	5	0	0.17	0.12969
GO:0071173	spindle assembly checkpoint	5	0	0.17	0.12969
GO:0071174	mitotic spindle checkpoint	5	0	0.17	0.12969
GO:1902100	negative regulation of metaphase/anaphase transition of cell cycle	5	0	0.17	0.12969
GO:0009581	detection of external stimulus	10	0	0.33	0.13002
GO:0009582	detection of abiotic stimulus	10	0	0.33	0.13002
GO:0048645	animal organ formation	20	1	0.67	0.13093
GO:0019742	pentacyclic triterpenoid metabolic process	5	0	0.17	0.13136
GO:0019745	pentacyclic triterpenoid biosynthetic process	5	0	0.17	0.13136
GO:0016104	triterpenoid biosynthetic process	5	0	0.17	0.13136
GO:0006722	triterpenoid metabolic process	5	0	0.17	0.13136
GO:0043650	dicarboxylic acid biosynthetic process	22	1	0.73	0.13186
GO:0006778	porphyrin-containing compound metabolic process	48	0	1.6	0.13282
GO:0017182	peptidyl-diphthamide metabolic process	6	1	0.2	0.13301
GO:0017183	peptidyl-diphthamide biosynthetic process from peptidyl-histidine	6	1	0.2	0.13301
GO:0009755	hormone-mediated signaling pathway	188	9	6.28	0.13328
GO:0006857	oligopeptide transport	20	2	0.67	0.13389
GO:0048638	regulation of developmental growth	14	1	0.47	0.13396
GO:0031124	mRNA 3'-end processing	14	0	0.47	0.13443
GO:0009649	entrainment of circadian clock	3	0	0.1	0.13478
GO:0080051	cutin transport	4	1	0.13	0.13548
GO:0036065	fucosylation	3	0	0.1	0.13561
GO:0015812	gamma-aminobutyric acid transport	1	1	0.03	0.13568
GO:0015808	L-alanine transport	1	1	0.03	0.13568
GO:0032328	alanine transport	1	1	0.03	0.13568
GO:0098662	inorganic cation transmembrane transport	280	17	9.35	0.13571
GO:0048759	xylem vessel member cell differentiation	1	1	0.03	0.13585
GO:0071902	positive regulation of protein serine/threonine kinase activity	12	1	0.4	0.13614
GO:0019567	arabinose biosynthetic process	1	1	0.03	0.13659
GO:0019322	pentose biosynthetic process	1	1	0.03	0.13659
GO:0032881	regulation of polysaccharide metabolic process	3	0	0.1	0.13671
GO:0015693	magnesium ion transport	13	1	0.43	0.13689
GO:0031323	regulation of cellular metabolic process	928	25	30.99	0.13721
GO:0023014	signal transduction by protein phosphorylation	73	3	2.44	0.13732
GO:0009690	cytokinin metabolic process	16	2	0.53	0.1374
GO:0009263	deoxyribonucleotide biosynthetic process	9	0	0.3	0.13792
GO:1902358	sulfate transmembrane transport	10	0	0.33	0.138
GO:0015833	peptide transport	21	2	0.7	0.13809
GO:0015698	inorganic anion transport	75	3	2.5	0.13873
GO:0034440	lipid oxidation	33	0	1.1	0.13874
GO:0019395	fatty acid oxidation	33	0	1.1	0.13874
GO:0006635	fatty acid beta-oxidation	33	0	1.1	0.13874
GO:0050667	homocysteine metabolic process	2	1	0.07	0.14033
GO:0001731	formation of translation preinitiation complex	20	1	0.67	0.14086
GO:0070940	dephosphorylation of RNA polymerase II C-terminal domain	1	1	0.03	0.14158
GO:0006552	leucine catabolic process	4	0	0.13	0.14243
GO:0042886	amide transport	26	2	0.87	0.14283
GO:0035383	thioester metabolic process	28	2	0.93	0.14341
GO:0006637	acyl-CoA metabolic process	28	2	0.93	0.14341
GO:0050685	positive regulation of mRNA processing	2	0	0.07	0.14389
GO:0061013	regulation of mRNA catabolic process	2	0	0.07	0.14389
GO:0061014	positive regulation of mRNA catabolic process	2	0	0.07	0.14389
GO:1900151	regulation of nuclear-transcribed mRNA catabolic process, deadenylation-dependent decay	2	0	0.07	0.14389
GO:0060211	regulation of nuclear-transcribed mRNA poly(A) tail shortening	2	0	0.07	0.14389
GO:0060213	positive regulation of nuclear-transcribed mRNA poly(A) tail shortening	2	0	0.07	0.14389
GO:0000289	nuclear-transcribed mRNA poly(A) tail shortening	2	0	0.07	0.14389
GO:1903313	positive regulation of mRNA metabolic process	2	0	0.07	0.14389
GO:0031440	regulation of mRNA 3'-end processing	2	0	0.07	0.14389
GO:0031442	positive regulation of mRNA 3'-end processing	2	0	0.07	0.14389
GO:0009886	post-embryonic animal morphogenesis	29	1	0.97	0.14462
GO:0015914	phospholipid transport	18	1	0.6	0.1454
GO:0097164	ammonium ion metabolic process	4	1	0.13	0.14579
GO:0010222	stem vascular tissue pattern formation	5	1	0.17	0.14618
GO:0035235	ionotropic glutamate receptor signaling pathway	1	1	0.03	0.14627
GO:0007215	glutamate receptor signaling pathway	1	1	0.03	0.14627
GO:0030162	regulation of proteolysis	30	1	1	0.14658
GO:0009225	nucleotide-sugar metabolic process	30	1	1	0.1468
GO:0018008	N-terminal peptidyl-glycine N-myristoylation	1	1	0.03	0.14688
GO:0018201	peptidyl-glycine modification	1	1	0.03	0.14688
GO:0015995	chlorophyll biosynthetic process	17	0	0.57	0.1474
GO:0043173	nucleotide salvage	11	1	0.37	0.14773
GO:0009892	negative regulation of metabolic process	129	3	4.31	0.14879
GO:0071722	detoxification of arsenic-containing substance	1	1	0.03	0.14894
GO:0033037	polysaccharide localization	2	0	0.07	0.14913
GO:0071244	cellular response to carbon dioxide	1	1	0.03	0.15041
GO:0009566	fertilization	4	0	0.13	0.15054
GO:0009567	double fertilization forming a zygote and endosperm	4	0	0.13	0.15054
GO:0033014	tetrapyrrole biosynthetic process	47	0	1.57	0.15066
GO:0032350	regulation of hormone metabolic process	6	0	0.2	0.15092
GO:0046416	D-amino acid metabolic process	5	0	0.17	0.15136
GO:0048588	developmental cell growth	11	0	0.37	0.15159
GO:0009932	cell tip growth	11	0	0.37	0.15159
GO:0009051	pentose-phosphate shunt, oxidative branch	1	1	0.03	0.15313
GO:0019740	nitrogen utilization	9	1	0.3	0.15317
GO:0072488	ammonium transmembrane transport	9	1	0.3	0.15317
GO:0009411	response to UV	18	1	0.6	0.15321
GO:0010224	response to UV-B	10	1	0.33	0.1534
GO:0006097	glyoxylate cycle	7	1	0.23	0.15346
GO:0009068	aspartate family amino acid catabolic process	1	1	0.03	0.15408
GO:0006567	threonine catabolic process	1	1	0.03	0.15408
GO:0008283	cell proliferation	17	0	0.57	0.15431
GO:0051090	regulation of sequence-specific DNA binding transcription factor activity	6	0	0.2	0.15609
GO:0071554	cell wall organization or biogenesis	290	15	9.68	0.15692
GO:0008216	spermidine metabolic process	10	0	0.33	0.15725
GO:0032352	positive regulation of hormone metabolic process	4	0	0.13	0.15732
GO:0051289	protein homotetramerization	1	0	0.03	0.1575
GO:1901999	homogentisate metabolic process	1	0	0.03	0.15778
GO:1902000	homogentisate catabolic process	1	0	0.03	0.15778
GO:0090354	regulation of auxin metabolic process	4	0	0.13	0.15796
GO:0046885	regulation of hormone biosynthetic process	4	0	0.13	0.15796
GO:0048449	floral organ formation	6	1	0.2	0.15814
GO:0015696	ammonium transport	15	1	0.5	0.15824
GO:0052547	regulation of peptidase activity	13	1	0.43	0.15867
GO:0010466	negative regulation of peptidase activity	13	1	0.43	0.15867
GO:0043207	response to external biotic stimulus	146	10	4.88	0.16065
GO:0051707	response to other organism	146	10	4.88	0.16065
GO:0008653	lipopolysaccharide metabolic process	2	0	0.07	0.16114
GO:0009103	lipopolysaccharide biosynthetic process	2	0	0.07	0.16114
GO:0045144	meiotic sister chromatid segregation	1	0	0.03	0.16121
GO:0007135	meiosis II	1	0	0.03	0.16121
GO:0051177	meiotic sister chromatid cohesion	1	0	0.03	0.16121
GO:0031062	positive regulation of histone methylation	1	0	0.03	0.16144
GO:0009773	photosynthetic electron transport in photosystem I	4	2	0.13	0.16283
GO:0051094	positive regulation of developmental process	22	2	0.73	0.16303
GO:0009637	response to blue light	18	0	0.6	0.1632
GO:0010092	specification of animal organ identity	4	1	0.13	0.16404
GO:0010093	specification of floral organ identity	4	1	0.13	0.16404
GO:0006101	citrate metabolic process	1	0	0.03	0.16436
GO:0043419	urea catabolic process	1	0	0.03	0.16541
GO:0036473	cell death in response to oxidative stress	1	0	0.03	0.16613
GO:0097468	programmed cell death in response to reactive oxygen species	1	0	0.03	0.16613
GO:0010343	singlet oxygen-mediated programmed cell death	1	0	0.03	0.16613
GO:0071452	cellular response to singlet oxygen	1	0	0.03	0.16613
GO:0032506	cytokinetic process	24	0	0.8	0.1666
GO:0043446	cellular alkane metabolic process	2	0	0.07	0.16751
GO:0043447	alkane biosynthetic process	2	0	0.07	0.16751
GO:0000290	deadenylation-dependent decapping of nuclear-transcribed mRNA	6	0	0.2	0.16769
GO:0046080	dUTP metabolic process	1	0	0.03	0.16771
GO:0046081	dUTP catabolic process	1	0	0.03	0.16771
GO:0046078	dUMP metabolic process	1	0	0.03	0.16771
GO:0006226	dUMP biosynthetic process	1	0	0.03	0.16771
GO:0006244	pyrimidine nucleotide catabolic process	1	0	0.03	0.16771
GO:0009149	pyrimidine nucleoside triphosphate catabolic process	1	0	0.03	0.16771
GO:0009223	pyrimidine deoxyribonucleotide catabolic process	1	0	0.03	0.16771
GO:0009213	pyrimidine deoxyribonucleoside triphosphate catabolic process	1	0	0.03	0.16771
GO:0034227	tRNA thio-modification	3	0	0.1	0.16883
GO:0048229	gametophyte development	80	11	2.67	0.16892
GO:0043649	dicarboxylic acid catabolic process	4	2	0.13	0.16972
GO:0010629	negative regulation of gene expression	76	3	2.54	0.16991
GO:0015858	nucleoside transport	9	2	0.3	0.17006
GO:1901616	organic hydroxy compound catabolic process	17	3	0.57	0.17154
GO:0010921	regulation of phosphatase activity	29	1	0.97	0.17174
GO:0043666	regulation of phosphoprotein phosphatase activity	29	1	0.97	0.17174
GO:0046037	GMP metabolic process	4	0	0.13	0.17213
GO:0016042	lipid catabolic process	70	0	2.34	0.17331
GO:0015807	L-amino acid transport	11	1	0.37	0.1735
GO:0051179	localization	2270	110	75.8	0.1736
GO:0044723	single-organism carbohydrate metabolic process	464	21	15.49	0.17369
GO:0010863	positive regulation of phospholipase C activity	1	0	0.03	0.17395
GO:0010517	regulation of phospholipase activity	1	0	0.03	0.17395
GO:0010518	positive regulation of phospholipase activity	1	0	0.03	0.17395
GO:0010919	regulation of inositol phosphate biosynthetic process	1	0	0.03	0.17395
GO:0032960	regulation of inositol trisphosphate biosynthetic process	1	0	0.03	0.17395
GO:0032959	inositol trisphosphate biosynthetic process	1	0	0.03	0.17395
GO:1900274	regulation of phospholipase C activity	1	0	0.03	0.17395
GO:0060191	regulation of lipase activity	1	0	0.03	0.17395
GO:0060193	positive regulation of lipase activity	1	0	0.03	0.17395
GO:0007202	activation of phospholipase C activity	1	0	0.03	0.17395
GO:0006571	tyrosine biosynthetic process	1	0	0.03	0.17395
GO:0010244	response to low fluence blue light stimulus by blue low-fluence system	1	0	0.03	0.17395
GO:0007169	transmembrane receptor protein tyrosine kinase signaling pathway	1	0	0.03	0.17449
GO:1901656	glycoside transport	1	0	0.03	0.17454
GO:0042946	glucoside transport	1	0	0.03	0.17454
GO:1902418	(+)-abscisic acid D-glucopyranosyl ester transmembrane transport	1	0	0.03	0.17454
GO:0006378	mRNA polyadenylation	9	0	0.3	0.17459
GO:0031348	negative regulation of defense response	8	0	0.27	0.17497
GO:0035337	fatty-acyl-CoA metabolic process	12	2	0.4	0.17502
GO:0007035	vacuolar acidification	8	0	0.27	0.17511
GO:0045851	pH reduction	8	0	0.27	0.17511
GO:0051452	intracellular pH reduction	8	0	0.27	0.17511
GO:0006780	uroporphyrinogen III biosynthetic process	6	0	0.2	0.17536
GO:0046502	uroporphyrinogen III metabolic process	6	0	0.2	0.17536
GO:0009555	pollen development	53	11	1.77	0.17548
GO:0032870	cellular response to hormone stimulus	192	9	6.41	0.1756
GO:0071495	cellular response to endogenous stimulus	192	9	6.41	0.1756
GO:0032048	cardiolipin metabolic process	1	0	0.03	0.17638
GO:0032049	cardiolipin biosynthetic process	1	0	0.03	0.17638
GO:0060631	regulation of meiosis I	1	0	0.03	0.17643
GO:0010520	regulation of reciprocal meiotic recombination	1	0	0.03	0.17643
GO:0006311	meiotic gene conversion	1	0	0.03	0.17643
GO:0045128	negative regulation of reciprocal meiotic recombination	1	0	0.03	0.17643
GO:0040020	regulation of meiotic nuclear division	1	0	0.03	0.17643
GO:0035822	gene conversion	1	0	0.03	0.17643
GO:0045835	negative regulation of meiotic nuclear division	1	0	0.03	0.17643
GO:0006433	prolyl-tRNA aminoacylation	3	0	0.1	0.17686
GO:0071258	cellular response to gravity	1	0	0.03	0.17798
GO:0010601	positive regulation of auxin biosynthetic process	1	0	0.03	0.17853
GO:0010031	circumnutation	1	0	0.03	0.17853
GO:0050879	multicellular organismal movement	1	0	0.03	0.17853
GO:0055114	oxidation-reduction process	1480	57	49.42	0.17857
GO:0032270	positive regulation of cellular protein metabolic process	68	1	2.27	0.17875
GO:0051247	positive regulation of protein metabolic process	68	1	2.27	0.17875
GO:0001172	transcription, RNA-templated	1	0	0.03	0.17954
GO:0045116	protein neddylation	8	0	0.27	0.18024
GO:0032261	purine nucleotide salvage	4	1	0.13	0.18041
GO:0032264	IMP salvage	4	1	0.13	0.18041
GO:0010605	negative regulation of macromolecule metabolic process	108	3	3.61	0.18046
GO:0010777	meiotic mismatch repair involved in reciprocal meiotic recombination	1	0	0.03	0.18121
GO:0051211	anisotropic cell growth	1	0	0.03	0.18187
GO:2000488	positive regulation of brassinosteroid biosynthetic process	1	0	0.03	0.18213
GO:0045940	positive regulation of steroid metabolic process	1	0	0.03	0.18213
GO:0010893	positive regulation of steroid biosynthetic process	1	0	0.03	0.18213
GO:0097503	sialylation	3	0	0.1	0.18226
GO:0009909	regulation of flower development	26	0	0.87	0.18238
GO:0015940	pantothenate biosynthetic process	3	0	0.1	0.18264
GO:0015939	pantothenate metabolic process	3	0	0.1	0.18264
GO:0060548	negative regulation of cell death	9	0	0.3	0.18324
GO:0031058	positive regulation of histone modification	4	0	0.13	0.18346
GO:2001252	positive regulation of chromosome organization	4	0	0.13	0.18346
GO:1903310	positive regulation of chromatin organization	4	0	0.13	0.18346
GO:0016125	sterol metabolic process	35	2	1.17	0.18348
GO:0050994	regulation of lipid catabolic process	1	0	0.03	0.18356
GO:0080093	regulation of photorespiration	1	0	0.03	0.18356
GO:0046320	regulation of fatty acid oxidation	1	0	0.03	0.18356
GO:0031998	regulation of fatty acid beta-oxidation	1	0	0.03	0.18356
GO:0044262	cellular carbohydrate metabolic process	231	16	7.71	0.184
GO:0006435	threonyl-tRNA aminoacylation	8	2	0.27	0.18464
GO:0098660	inorganic ion transmembrane transport	293	17	9.78	0.18472
GO:0002943	tRNA dihydrouridine synthesis	2	0	0.07	0.18528
GO:0018023	peptidyl-lysine trimethylation	4	0	0.13	0.18532
GO:0007283	spermatogenesis	1	0	0.03	0.18759
GO:0019700	organic phosphonate catabolic process	1	0	0.03	0.18775
GO:0019634	organic phosphonate metabolic process	1	0	0.03	0.18775
GO:0098734	macromolecule depalmitoylation	6	1	0.2	0.18898
GO:0006820	anion transport	239	17	7.98	0.18906
GO:0051172	negative regulation of nitrogen compound metabolic process	50	2	1.67	0.18909
GO:0008295	spermidine biosynthetic process	9	0	0.3	0.18923
GO:1901160	primary amino compound metabolic process	2	0	0.07	0.18947
GO:0006580	ethanolamine metabolic process	2	0	0.07	0.18947
GO:0006066	alcohol metabolic process	92	6	3.07	0.18978
GO:0097306	cellular response to alcohol	87	8	2.91	0.19093
GO:0080154	regulation of fertilization	1	0	0.03	0.19105
GO:0080155	regulation of double fertilization forming a zygote and endosperm	1	0	0.03	0.19105
GO:0048283	indeterminate inflorescence morphogenesis	1	0	0.03	0.19105
GO:0006855	drug transmembrane transport	74	3	2.47	0.19124
GO:0090501	RNA phosphodiester bond hydrolysis	62	1	2.07	0.19136
GO:0010581	regulation of starch biosynthetic process	1	0	0.03	0.19142
GO:1901463	regulation of tetrapyrrole biosynthetic process	1	0	0.03	0.19142
GO:0010380	regulation of chlorophyll biosynthetic process	1	0	0.03	0.19142
GO:0008535	respiratory chain complex IV assembly	5	0	0.17	0.19187
GO:0006399	tRNA metabolic process	165	2	5.51	0.19224
GO:0001676	long-chain fatty acid metabolic process	10	3	0.33	0.19302
GO:0006801	superoxide metabolic process	24	1	0.8	0.19366
GO:0002683	negative regulation of immune system process	6	0	0.2	0.19414
GO:0010304	PSII associated light-harvesting complex II catabolic process	9	0	0.3	0.19433
GO:0006428	isoleucyl-tRNA aminoacylation	3	0	0.1	0.19441
GO:0042126	nitrate metabolic process	1	0	0.03	0.19461
GO:0042128	nitrate assimilation	1	0	0.03	0.19461
GO:0035303	regulation of dephosphorylation	30	1	1	0.19491
GO:0042214	terpene metabolic process	8	0	0.27	0.1971
GO:0016119	carotene metabolic process	8	0	0.27	0.1971
GO:0090502	RNA phosphodiester bond hydrolysis, endonucleolytic	38	1	1.27	0.19799
GO:0046339	diacylglycerol metabolic process	1	0	0.03	0.19838
GO:0006651	diacylglycerol biosynthetic process	1	0	0.03	0.19838
GO:0045787	positive regulation of cell cycle	11	0	0.37	0.19862
GO:0009061	anaerobic respiration	5	0	0.17	0.19894
GO:0070483	detection of hypoxia	5	0	0.17	0.19894
GO:0003032	detection of oxygen	5	0	0.17	0.19894
GO:0018158	protein oxidation	5	0	0.17	0.19894
GO:0018171	peptidyl-cysteine oxidation	5	0	0.17	0.19894
GO:0033353	S-adenosylmethionine cycle	2	0	0.07	0.19921
GO:0071806	protein transmembrane transport	49	3	1.64	0.19946
GO:0017003	protein-heme linkage	1	0	0.03	0.19952
GO:0018063	cytochrome c-heme linkage	1	0	0.03	0.19952
GO:0010363	regulation of plant-type hypersensitive response	3	0	0.1	0.19964
GO:0010970	transport along microtubule	1	0	0.03	0.20077
GO:0044782	cilium organization	1	0	0.03	0.20077
GO:0035721	intraciliary retrograde transport	1	0	0.03	0.20077
GO:0032990	cell part morphogenesis	1	0	0.03	0.20077
GO:0042073	intraciliary transport	1	0	0.03	0.20077
GO:0060271	cilium assembly	1	0	0.03	0.20077
GO:0048858	cell projection morphogenesis	1	0	0.03	0.20077
GO:0018315	molybdenum incorporation into molybdenum-molybdopterin complex	4	0	0.13	0.20097
GO:0042040	metal incorporation into metallo-molybdopterin complex	4	0	0.13	0.20097
GO:0002213	defense response to insect	1	0	0.03	0.20148
GO:0009625	response to insect	1	0	0.03	0.20148
GO:0009062	fatty acid catabolic process	34	0	1.14	0.20201
GO:0009147	pyrimidine nucleoside triphosphate metabolic process	18	2	0.6	0.20201
GO:0036297	interstrand cross-link repair	7	0	0.23	0.20288
GO:1902023	L-arginine transport	1	0	0.03	0.20291
GO:0090467	arginine import	1	0	0.03	0.20291
GO:0015822	ornithine transport	1	0	0.03	0.20291
GO:0043091	L-arginine import	1	0	0.03	0.20291
GO:1903352	L-ornithine transmembrane transport	1	0	0.03	0.20291
GO:0009887	animal organ morphogenesis	44	1	1.47	0.20307
GO:0042780	tRNA 3'-end processing	3	0	0.1	0.20331
GO:0042779	tRNA 3'-trailer cleavage	3	0	0.1	0.20331
GO:0034414	tRNA 3'-trailer cleavage, endonucleolytic	3	0	0.1	0.20331
GO:0016093	polyprenol metabolic process	3	0	0.1	0.2035
GO:0035269	protein O-linked mannosylation	3	0	0.1	0.2035
GO:0019348	dolichol metabolic process	3	0	0.1	0.2035
GO:0006298	mismatch repair	12	0	0.4	0.2035
GO:0006048	UDP-N-acetylglucosamine biosynthetic process	5	0	0.17	0.20359
GO:0046349	amino sugar biosynthetic process	5	0	0.17	0.20359
GO:0006545	glycine biosynthetic process	4	1	0.13	0.20372
GO:0009176	pyrimidine deoxyribonucleoside monophosphate metabolic process	4	0	0.13	0.20526
GO:0009177	pyrimidine deoxyribonucleoside monophosphate biosynthetic process	4	0	0.13	0.20526
GO:0046165	alcohol biosynthetic process	51	3	1.7	0.20587
GO:0097435	supramolecular fiber organization	1	0	0.03	0.20612
GO:0009765	photosynthesis, light harvesting	50	0	1.67	0.20651
GO:0000379	tRNA-type intron splice site recognition and cleavage	2	0	0.07	0.207
GO:1901701	cellular response to oxygen-containing compound	209	16	6.98	0.20737
GO:0019388	galactose catabolic process	2	0	0.07	0.20763
GO:0008299	isoprenoid biosynthetic process	71	2	2.37	0.20826
GO:0006998	nuclear envelope organization	2	0	0.07	0.20842
GO:0031468	nuclear envelope reassembly	2	0	0.07	0.20842
GO:0048469	cell maturation	10	0	0.33	0.20856
GO:0048764	trichoblast maturation	10	0	0.33	0.20856
GO:0048765	root hair cell differentiation	10	0	0.33	0.20856
GO:0006323	DNA packaging	49	1	1.64	0.20858
GO:0033467	CMP-keto-3-deoxy-D-manno-octulosonic acid metabolic process	1	0	0.03	0.20958
GO:0033468	CMP-keto-3-deoxy-D-manno-octulosonic acid biosynthetic process	1	0	0.03	0.20958
GO:0006875	cellular metal ion homeostasis	70	2	2.34	0.21002
GO:0070887	cellular response to chemical stimulus	345	18	11.52	0.2102
GO:0048354	mucilage biosynthetic process involved in seed coat development	1	0	0.03	0.21082
GO:0048359	mucilage metabolic process involved in seed coat development	1	0	0.03	0.21082
GO:0010191	mucilage metabolic process	1	0	0.03	0.21082
GO:0010192	mucilage biosynthetic process	1	0	0.03	0.21082
GO:0052548	regulation of endopeptidase activity	10	0	0.33	0.21129
GO:0010951	negative regulation of endopeptidase activity	10	0	0.33	0.21129
GO:0098661	inorganic anion transmembrane transport	23	1	0.77	0.21183
GO:0097034	mitochondrial respiratory chain complex IV biogenesis	5	0	0.17	0.2126
GO:0009733	response to auxin	139	3	4.64	0.2132
GO:0006072	glycerol-3-phosphate metabolic process	12	2	0.4	0.21388
GO:0018026	peptidyl-lysine monomethylation	6	0	0.2	0.21418
GO:0050691	regulation of defense response to virus by host	1	0	0.03	0.21618
GO:0002230	positive regulation of defense response to virus by host	1	0	0.03	0.21618
GO:0034477	U6 snRNA 3'-end processing	1	0	0.03	0.21641
GO:0006480	N-terminal protein amino acid methylation	1	0	0.03	0.21681
GO:0015015	heparan sulfate proteoglycan biosynthetic process, enzymatic modification	1	0	0.03	0.21687
GO:0046160	heme a metabolic process	1	0	0.03	0.21767
GO:0006784	heme a biosynthetic process	1	0	0.03	0.21767
GO:0048466	androecium development	12	1	0.4	0.21794
GO:0048443	stamen development	12	1	0.4	0.21794
GO:0015825	L-serine transport	2	0	0.07	0.21824
GO:0032329	serine transport	2	0	0.07	0.21824
GO:0061062	regulation of nematode larval development	1	0	0.03	0.21883
GO:0008285	negative regulation of cell proliferation	1	0	0.03	0.21883
GO:0002164	larval development	1	0	0.03	0.21883
GO:0002119	nematode larval development	1	0	0.03	0.21883
GO:0010941	regulation of cell death	12	0	0.4	0.21914
GO:0046939	nucleotide phosphorylation	13	0	0.43	0.21978
GO:0009094	L-phenylalanine biosynthetic process	4	1	0.13	0.2198
GO:0009095	aromatic amino acid family biosynthetic process, prephenate pathway	4	1	0.13	0.2198
GO:1902223	erythrose 4-phosphate/phosphoenolpyruvate family amino acid biosynthetic process	4	1	0.13	0.2198
GO:0043266	regulation of potassium ion transport	1	0	0.03	0.22174
GO:0009451	RNA modification	122	2	4.07	0.22199
GO:0010249	auxin conjugate metabolic process	1	0	0.03	0.22215
GO:0032509	endosome transport via multivesicular body sorting pathway	9	0	0.3	0.22276
GO:0048658	anther wall tapetum development	3	0	0.1	0.22283
GO:0019321	pentose metabolic process	24	4	0.8	0.22307
GO:0010082	regulation of root meristem growth	5	0	0.17	0.22311
GO:0010449	root meristem growth	5	0	0.17	0.22311
GO:0045944	positive regulation of transcription from RNA polymerase II promoter	35	0	1.17	0.22423
GO:0009624	response to nematode	2	0	0.07	0.22443
GO:0036294	cellular response to decreased oxygen levels	1	0	0.03	0.22443
GO:0071453	cellular response to oxygen levels	1	0	0.03	0.22443
GO:0071456	cellular response to hypoxia	1	0	0.03	0.22443
GO:0009823	cytokinin catabolic process	3	0	0.1	0.22453
GO:0044242	cellular lipid catabolic process	45	0	1.5	0.22454
GO:0010558	negative regulation of macromolecule biosynthetic process	61	2	2.04	0.22506
GO:2000113	negative regulation of cellular macromolecule biosynthetic process	61	2	2.04	0.22506
GO:0042398	cellular modified amino acid biosynthetic process	27	0	0.9	0.22513
GO:0009742	brassinosteroid mediated signaling pathway	21	1	0.7	0.2254
GO:0048545	response to steroid hormone	21	1	0.7	0.2254
GO:0043401	steroid hormone mediated signaling pathway	21	1	0.7	0.2254
GO:0071367	cellular response to brassinosteroid stimulus	21	1	0.7	0.2254
GO:0071383	cellular response to steroid hormone stimulus	21	1	0.7	0.2254
GO:0006616	SRP-dependent cotranslational protein targeting to membrane, translocation	1	0	0.03	0.22567
GO:0045900	negative regulation of translational elongation	1	0	0.03	0.22567
GO:0009262	deoxyribonucleotide metabolic process	11	0	0.37	0.22589
GO:0070613	regulation of protein processing	17	0	0.57	0.22615
GO:1903050	regulation of proteolysis involved in cellular protein catabolic process	17	0	0.57	0.22615
GO:1903362	regulation of cellular protein catabolic process	17	0	0.57	0.22615
GO:1903317	regulation of protein maturation	17	0	0.57	0.22615
GO:0061136	regulation of proteasomal protein catabolic process	17	0	0.57	0.22615
GO:0010206	photosystem II repair	16	0	0.53	0.2263
GO:0010928	regulation of auxin mediated signaling pathway	14	0	0.47	0.22639
GO:0006721	terpenoid metabolic process	65	1	2.17	0.2267
GO:0071545	inositol phosphate catabolic process	5	0	0.17	0.22715
GO:0046855	inositol phosphate dephosphorylation	5	0	0.17	0.22715
GO:0046838	phosphorylated carbohydrate dephosphorylation	5	0	0.17	0.22715
GO:0006122	mitochondrial electron transport, ubiquinol to cytochrome c	13	0	0.43	0.22724
GO:0006952	defense response	243	16	8.11	0.22748
GO:0009698	phenylpropanoid metabolic process	99	8	3.31	0.22801
GO:0044712	single-organism catabolic process	437	24	14.59	0.23062
GO:0006388	tRNA splicing, via endonucleolytic cleavage and ligation	9	0	0.3	0.23077
GO:1901598	(-)-pinoresinol metabolic process	1	0	0.03	0.23133
GO:1901599	(-)-pinoresinol biosynthetic process	1	0	0.03	0.23133
GO:0051483	terpenoid biosynthetic process, mevalonate-independent	1	0	0.03	0.23163
GO:0051484	isopentenyl diphosphate biosynthetic process, methylerythritol 4-phosphate pathway involved in terpenoid biosynthetic process	1	0	0.03	0.23163
GO:0033478	UDP-rhamnose metabolic process	1	0	0.03	0.23212
GO:0046383	dTDP-rhamnose metabolic process	1	0	0.03	0.23212
GO:0019305	dTDP-rhamnose biosynthetic process	1	0	0.03	0.23212
GO:0010253	UDP-rhamnose biosynthetic process	1	0	0.03	0.23212
GO:0032774	RNA biosynthetic process	931	30	31.09	0.2335
GO:0006269	DNA replication, synthesis of RNA primer	1	0	0.03	0.23393
GO:1901976	regulation of cell cycle checkpoint	1	0	0.03	0.23423
GO:0090266	regulation of mitotic cell cycle spindle assembly checkpoint	1	0	0.03	0.23423
GO:0090231	regulation of spindle checkpoint	1	0	0.03	0.23423
GO:0051865	protein autoubiquitination	3	0	0.1	0.23461
GO:1902975	mitotic DNA replication initiation	1	0	0.03	0.2349
GO:1902315	nuclear cell cycle DNA replication initiation	1	0	0.03	0.2349
GO:1902292	cell cycle DNA replication initiation	1	0	0.03	0.2349
GO:0044042	glucan metabolic process	123	7	4.11	0.23497
GO:0071577	zinc II ion transmembrane transport	16	2	0.53	0.23551
GO:0008037	cell recognition	18	0	0.6	0.2356
GO:0009988	cell-cell recognition	1	0	0.03	0.23587
GO:0080173	male-female gamete recognition during double fertilization	1	0	0.03	0.23587
GO:0002940	tRNA N2-guanine methylation	6	0	0.2	0.23694
GO:0090558	plant epidermis development	14	1	0.47	0.23695
GO:0046942	carboxylic acid transport	103	12	3.44	0.23768
GO:0015849	organic acid transport	103	12	3.44	0.23768
GO:0022613	ribonucleoprotein complex biogenesis	321	5	10.72	0.2382
GO:0009644	response to high light intensity	13	0	0.43	0.23878
GO:0043473	pigmentation	7	0	0.23	0.23883
GO:0010315	auxin efflux	7	0	0.23	0.23883
GO:0031426	polycistronic mRNA processing	3	0	0.1	0.23912
GO:0055065	metal ion homeostasis	78	3	2.6	0.23967
GO:0031497	chromatin assembly	44	1	1.47	0.23986
GO:0002181	cytoplasmic translation	33	1	1.1	0.24017
GO:0044210	'de novo' CTP biosynthetic process	5	2	0.17	0.24126
GO:0048563	post-embryonic animal organ morphogenesis	9	1	0.3	0.24157
GO:0048444	floral organ morphogenesis	9	1	0.3	0.24157
GO:0006351	transcription, DNA-templated	922	30	30.79	0.24164
GO:0009583	detection of light stimulus	7	0	0.23	0.24212
GO:0009585	red, far-red light phototransduction	7	0	0.23	0.24212
GO:0007602	phototransduction	7	0	0.23	0.24212
GO:0015893	drug transport	75	3	2.5	0.24217
GO:0042493	response to drug	75	3	2.5	0.24217
GO:0019605	butyrate metabolic process	3	1	0.1	0.24236
GO:0046459	short-chain fatty acid metabolic process	3	1	0.1	0.24236
GO:0006542	glutamine biosynthetic process	4	0	0.13	0.24255
GO:0009756	carbohydrate mediated signaling	8	0	0.27	0.24272
GO:0010182	sugar mediated signaling pathway	8	0	0.27	0.24272
GO:0009960	endosperm development	4	0	0.13	0.24307
GO:0006984	ER-nucleus signaling pathway	14	1	0.47	0.24342
GO:0065002	intracellular protein transmembrane transport	41	3	1.37	0.24371
GO:0010833	telomere maintenance via telomere lengthening	1	0	0.03	0.24405
GO:0007004	telomere maintenance via telomerase	1	0	0.03	0.24405
GO:0000722	telomere maintenance via recombination	1	0	0.03	0.24405
GO:0009396	folic acid-containing compound biosynthetic process	14	0	0.47	0.2444
GO:1901679	nucleotide transmembrane transport	6	0	0.2	0.24534
GO:0080135	regulation of cellular response to stress	11	1	0.37	0.24538
GO:0019673	GDP-mannose metabolic process	4	1	0.13	0.24547
GO:2000034	regulation of seed maturation	2	0	0.07	0.24589
GO:0080050	regulation of seed development	2	0	0.07	0.24589
GO:0019222	regulation of metabolic process	1078	29	36	0.24647
GO:0018022	peptidyl-lysine methylation	11	0	0.37	0.24647
GO:0006056	mannoprotein metabolic process	1	0	0.03	0.2473
GO:0006057	mannoprotein biosynthetic process	1	0	0.03	0.2473
GO:0031506	cell wall glycoprotein biosynthetic process	1	0	0.03	0.2473
GO:0000032	cell wall mannoprotein biosynthetic process	1	0	0.03	0.2473
GO:0044845	chain elongation of O-linked mannose residue	1	0	0.03	0.2473
GO:1900101	regulation of endoplasmic reticulum unfolded protein response	1	0	0.03	0.2473
GO:0010927	cellular component assembly involved in morphogenesis	15	9	0.5	0.24732
GO:0010208	pollen wall assembly	15	9	0.5	0.24732
GO:0016556	mRNA modification	3	0	0.1	0.24743
GO:1902001	fatty acid transmembrane transport	1	0	0.03	0.24787
GO:0098732	macromolecule deacylation	13	1	0.43	0.24787
GO:0006850	mitochondrial pyruvate transport	1	0	0.03	0.24824
GO:0006901	vesicle coating	3	0	0.1	0.24961
GO:0048268	clathrin coat assembly	3	0	0.1	0.24961
GO:0009789	positive regulation of abscisic acid-activated signaling pathway	1	0	0.03	0.25014
GO:0010942	positive regulation of cell death	1	0	0.03	0.25014
GO:1901421	positive regulation of response to alcohol	1	0	0.03	0.25014
GO:0043068	positive regulation of programmed cell death	1	0	0.03	0.25014
GO:0006935	chemotaxis	7	1	0.23	0.25061
GO:0050918	positive chemotaxis	7	1	0.23	0.25061
GO:0010183	pollen tube guidance	7	1	0.23	0.25061
GO:0042330	taxis	7	1	0.23	0.25061
GO:0006865	amino acid transport	79	10	2.64	0.25091
GO:0048518	positive regulation of biological process	208	5	6.95	0.25106
GO:1902047	polyamine transmembrane transport	4	1	0.13	0.25139
GO:0015846	polyamine transport	4	1	0.13	0.25139
GO:0010029	regulation of seed germination	14	3	0.47	0.25175
GO:0042446	hormone biosynthetic process	41	3	1.37	0.25192
GO:0010588	cotyledon vascular tissue pattern formation	6	1	0.2	0.25283
GO:0010431	seed maturation	10	0	0.33	0.25359
GO:0015781	pyrimidine nucleotide-sugar transport	6	0	0.2	0.25415
GO:0015811	L-cystine transport	1	0	0.03	0.2542
GO:0000101	sulfur amino acid transport	1	0	0.03	0.2542
GO:0045824	negative regulation of innate immune response	5	0	0.17	0.25516
GO:0050777	negative regulation of immune response	5	0	0.17	0.25516
GO:0048767	root hair elongation	2	0	0.07	0.25556
GO:0014070	response to organic cyclic compound	61	2	2.04	0.25573
GO:0015757	galactose transport	1	0	0.03	0.25632
GO:2000242	negative regulation of reproductive process	7	0	0.23	0.25637
GO:0010075	regulation of meristem growth	11	1	0.37	0.25725
GO:0046477	glycosylceramide catabolic process	1	0	0.03	0.25754
GO:0046479	glycosphingolipid catabolic process	1	0	0.03	0.25754
GO:0016139	glycoside catabolic process	1	0	0.03	0.25754
GO:0019377	glycolipid catabolic process	1	0	0.03	0.25754
GO:0046514	ceramide catabolic process	1	0	0.03	0.25754
GO:0006687	glycosphingolipid metabolic process	1	0	0.03	0.25754
GO:0006677	glycosylceramide metabolic process	1	0	0.03	0.25754
GO:0007076	mitotic chromosome condensation	1	0	0.03	0.2576
GO:0046487	glyoxylate metabolic process	8	1	0.27	0.25795
GO:0044703	multi-organism reproductive process	64	1	2.14	0.25848
GO:0036092	phosphatidylinositol-3-phosphate biosynthetic process	3	0	0.1	0.25857
GO:0046467	membrane lipid biosynthetic process	26	1	0.87	0.26054
GO:0009247	glycolipid biosynthetic process	22	1	0.73	0.26069
GO:0003333	amino acid transmembrane transport	68	9	2.27	0.26162
GO:0042159	lipoprotein catabolic process	5	0	0.17	0.2618
GO:0002084	protein depalmitoylation	5	0	0.17	0.2618
GO:0043255	regulation of carbohydrate biosynthetic process	4	0	0.13	0.26192
GO:0006310	DNA recombination	101	2	3.37	0.26233
GO:0009860	pollen tube growth	9	0	0.3	0.26246
GO:0046620	regulation of organ growth	3	1	0.1	0.26247
GO:0065009	regulation of molecular function	219	7	7.31	0.2625
GO:0061504	cyclic threonylcarbamoyladenosine biosynthetic process	1	0	0.03	0.2639
GO:0080156	mitochondrial mRNA modification	1	0	0.03	0.26422
GO:0046451	diaminopimelate metabolic process	13	0	0.43	0.2651
GO:0035494	SNARE complex disassembly	2	0	0.07	0.26537
GO:0046497	nicotinate nucleotide metabolic process	1	0	0.03	0.26652
GO:0019365	pyridine nucleotide salvage	1	0	0.03	0.26652
GO:0019357	nicotinate nucleotide biosynthetic process	1	0	0.03	0.26652
GO:0019358	nicotinate nucleotide salvage	1	0	0.03	0.26652
GO:0006829	zinc II ion transport	18	2	0.6	0.26671
GO:0033617	mitochondrial respiratory chain complex IV assembly	4	0	0.13	0.26697
GO:0009314	response to radiation	168	3	5.61	0.26712
GO:0090304	nucleic acid metabolic process	2337	42	78.04	0.2678
GO:0006848	pyruvate transport	2	0	0.07	0.27079
GO:0035194	posttranscriptional gene silencing by RNA	21	1	0.7	0.27182
GO:0006556	S-adenosylmethionine biosynthetic process	7	0	0.23	0.27397
GO:0006597	spermine biosynthetic process	7	0	0.23	0.274
GO:0008215	spermine metabolic process	7	0	0.23	0.274
GO:0009558	embryo sac cellularization	5	0	0.17	0.27405
GO:0007349	cellularization	5	0	0.17	0.27405
GO:0071702	organic substance transport	704	47	23.51	0.2745
GO:0072329	monocarboxylic acid catabolic process	41	0	1.37	0.27522
GO:0044743	protein transmembrane import into intracellular organelle	39	3	1.3	0.27542
GO:0044208	'de novo' AMP biosynthetic process	4	0	0.13	0.27565
GO:0080163	regulation of protein serine/threonine phosphatase activity	12	1	0.4	0.27579
GO:0009862	systemic acquired resistance, salicylic acid mediated signaling pathway	4	0	0.13	0.27588
GO:0048316	seed development	113	5	3.77	0.27633
GO:0000055	ribosomal large subunit export from nucleus	2	0	0.07	0.27656
GO:1902932	positive regulation of alcohol biosynthetic process	4	0	0.13	0.27659
GO:0045834	positive regulation of lipid metabolic process	4	0	0.13	0.27659
GO:0046889	positive regulation of lipid biosynthetic process	4	0	0.13	0.27659
GO:0010262	somatic embryogenesis	4	1	0.13	0.27659
GO:0019566	arabinose metabolic process	5	1	0.17	0.27768
GO:0042273	ribosomal large subunit biogenesis	76	1	2.54	0.27813
GO:0043331	response to dsRNA	16	1	0.53	0.27839
GO:0070918	production of small RNA involved in gene silencing by RNA	16	1	0.53	0.27839
GO:0031050	dsRNA fragmentation	16	1	0.53	0.27839
GO:0071359	cellular response to dsRNA	16	1	0.53	0.27839
GO:0010876	lipid localization	55	2	1.84	0.27887
GO:0032103	positive regulation of response to external stimulus	1	0	0.03	0.27974
GO:0032104	regulation of response to extracellular stimulus	1	0	0.03	0.27974
GO:0032106	positive regulation of response to extracellular stimulus	1	0	0.03	0.27974
GO:0032107	regulation of response to nutrient levels	1	0	0.03	0.27974
GO:0032109	positive regulation of response to nutrient levels	1	0	0.03	0.27974
GO:0080040	positive regulation of cellular response to phosphate starvation	1	0	0.03	0.27974
GO:0042254	ribosome biogenesis	248	3	8.28	0.28102
GO:0006073	cellular glucan metabolic process	118	7	3.94	0.28117
GO:0052889	9,9'-di-cis-zeta-carotene desaturation to 7,9,7',9'-tetra-cis-lycopene	7	0	0.23	0.28194
GO:0098655	cation transmembrane transport	311	19	10.38	0.28282
GO:0009738	abscisic acid-activated signaling pathway	65	7	2.17	0.28347
GO:0010089	xylem development	9	1	0.3	0.28397
GO:0042981	regulation of apoptotic process	1	0	0.03	0.28403
GO:0043066	negative regulation of apoptotic process	1	0	0.03	0.28403
GO:0043433	negative regulation of sequence-specific DNA binding transcription factor activity	2	0	0.07	0.2852
GO:0006148	inosine catabolic process	2	1	0.07	0.2854
GO:0006400	tRNA modification	48	0	1.6	0.28607
GO:0035434	copper ion transmembrane transport	9	2	0.3	0.28628
GO:0051606	detection of stimulus	24	0	0.8	0.28645
GO:0000393	spliceosomal conformational changes to generate catalytic conformation	3	0	0.1	0.28735
GO:0000350	generation of catalytic spliceosome for second transesterification step	3	0	0.1	0.28735
GO:0006352	DNA-templated transcription, initiation	49	1	1.64	0.28773
GO:1902930	regulation of alcohol biosynthetic process	7	0	0.23	0.28852
GO:2000070	regulation of response to water deprivation	3	1	0.1	0.28902
GO:0000737	DNA catabolic process, endonucleolytic	1	0	0.03	0.28905
GO:0009308	amine metabolic process	82	4	2.74	0.28927
GO:0009620	response to fungus	63	4	2.1	0.29054
GO:0015802	basic amino acid transport	4	1	0.13	0.29056
GO:0019563	glycerol catabolic process	6	2	0.2	0.29083
GO:0019405	alditol catabolic process	6	2	0.2	0.29083
GO:0098656	anion transmembrane transport	122	12	4.07	0.29084
GO:0043631	RNA polyadenylation	12	0	0.4	0.29114
GO:0046856	phosphatidylinositol dephosphorylation	4	0	0.13	0.29188
GO:0045898	regulation of RNA polymerase II transcriptional preinitiation complex assembly	7	0	0.23	0.29258
GO:0045899	positive regulation of RNA polymerase II transcriptional preinitiation complex assembly	7	0	0.23	0.29258
GO:0010190	cytochrome b6f complex assembly	3	0	0.1	0.29295
GO:1902679	negative regulation of RNA biosynthetic process	44	2	1.47	0.29306
GO:0045892	negative regulation of transcription, DNA-templated	44	2	1.47	0.29306
GO:0051253	negative regulation of RNA metabolic process	44	2	1.47	0.29306
GO:0072344	rescue of stalled ribosome	1	0	0.03	0.29426
GO:0070262	peptidyl-serine dephosphorylation	1	0	0.03	0.29517
GO:0035970	peptidyl-threonine dephosphorylation	1	0	0.03	0.29517
GO:0019852	L-ascorbic acid metabolic process	1	0	0.03	0.29559
GO:0019853	L-ascorbic acid biosynthetic process	1	0	0.03	0.29559
GO:0055076	transition metal ion homeostasis	60	0	2	0.29569
GO:0005982	starch metabolic process	24	1	0.8	0.29578
GO:0006720	isoprenoid metabolic process	95	2	3.17	0.29628
GO:0071482	cellular response to light stimulus	19	0	0.63	0.2963
GO:0051262	protein tetramerization	6	0	0.2	0.2971
GO:1900140	regulation of seedling development	15	3	0.5	0.29738
GO:0000466	maturation of 5.8S rRNA from tricistronic rRNA transcript (SSU-rRNA, 5.8S rRNA, LSU-rRNA)	15	1	0.5	0.29788
GO:0010374	stomatal complex development	13	1	0.43	0.29806
GO:0006904	vesicle docking involved in exocytosis	20	0	0.67	0.29833
GO:0009309	amine biosynthetic process	36	2	1.2	0.29841
GO:0042401	cellular biogenic amine biosynthetic process	36	2	1.2	0.29841
GO:0010954	positive regulation of protein processing	16	0	0.53	0.29848
GO:0045732	positive regulation of protein catabolic process	16	0	0.53	0.29848
GO:1903052	positive regulation of proteolysis involved in cellular protein catabolic process	16	0	0.53	0.29848
GO:0045862	positive regulation of proteolysis	16	0	0.53	0.29848
GO:1903319	positive regulation of protein maturation	16	0	0.53	0.29848
GO:1901800	positive regulation of proteasomal protein catabolic process	16	0	0.53	0.29848
GO:0033013	tetrapyrrole metabolic process	54	0	1.8	0.2998
GO:0046174	polyol catabolic process	15	3	0.5	0.30038
GO:1990069	stomatal opening	5	1	0.17	0.30043
GO:0042447	hormone catabolic process	4	0	0.13	0.30058
GO:0046437	D-amino acid biosynthetic process	1	0	0.03	0.30073
GO:0070178	D-serine metabolic process	1	0	0.03	0.30073
GO:0070179	D-serine biosynthetic process	1	0	0.03	0.30073
GO:0031425	chloroplast RNA processing	7	0	0.23	0.30105
GO:0048580	regulation of post-embryonic development	57	3	1.9	0.30172
GO:0051188	cofactor biosynthetic process	139	2	4.64	0.30194
GO:0009088	threonine biosynthetic process	2	0	0.07	0.30238
GO:0008612	peptidyl-lysine modification to peptidyl-hypusine	2	0	0.07	0.30258
GO:0035335	peptidyl-tyrosine dephosphorylation	28	0	0.93	0.30267
GO:0006413	translational initiation	91	4	3.04	0.30268
GO:0009084	glutamine family amino acid biosynthetic process	29	1	0.97	0.30437
GO:0046385	deoxyribose phosphate biosynthetic process	5	0	0.17	0.30437
GO:0009265	2'-deoxyribonucleotide biosynthetic process	5	0	0.17	0.30437
GO:0009221	pyrimidine deoxyribonucleotide biosynthetic process	5	0	0.17	0.30437
GO:0009219	pyrimidine deoxyribonucleotide metabolic process	5	0	0.17	0.30437
GO:0032886	regulation of microtubule-based process	3	0	0.1	0.30504
GO:0032447	protein urmylation	2	0	0.07	0.3055
GO:0070813	hydrogen sulfide metabolic process	2	0	0.07	0.3059
GO:0070814	hydrogen sulfide biosynthetic process	2	0	0.07	0.3059
GO:0019478	D-amino acid catabolic process	4	0	0.13	0.30645
GO:0080182	histone H3-K4 trimethylation	3	0	0.1	0.30682
GO:0032780	negative regulation of ATPase activity	1	0	0.03	0.30707
GO:0044273	sulfur compound catabolic process	11	1	0.37	0.30715
GO:0006551	leucine metabolic process	5	0	0.17	0.30718
GO:0046471	phosphatidylglycerol metabolic process	5	0	0.17	0.30728
GO:0006655	phosphatidylglycerol biosynthetic process	5	0	0.17	0.30728
GO:0048868	pollen tube development	18	1	0.6	0.30745
GO:0070126	mitochondrial translational termination	2	0	0.07	0.30833
GO:0000003	reproduction	69	0	2.3	0.30905
GO:0009751	response to salicylic acid	14	0	0.47	0.30971
GO:0072530	purine-containing compound transmembrane transport	5	0	0.17	0.3101
GO:0071423	malate transmembrane transport	5	0	0.17	0.31065
GO:0046490	isopentenyl diphosphate metabolic process	7	0	0.23	0.31132
GO:0009240	isopentenyl diphosphate biosynthetic process	7	0	0.23	0.31132
GO:0006982	response to lipid hydroperoxide	1	0	0.03	0.31153
GO:0033194	response to hydroperoxide	1	0	0.03	0.31153
GO:0010335	response to non-ionic osmotic stress	1	0	0.03	0.31153
GO:0006308	DNA catabolic process	8	0	0.27	0.31184
GO:0051050	positive regulation of transport	5	0	0.17	0.31201
GO:0044699	single-organism process	6613	267	220.82	0.3133
GO:0009148	pyrimidine nucleoside triphosphate biosynthetic process	17	2	0.57	0.31387
GO:0036265	RNA (guanine-N7)-methylation	1	0	0.03	0.31493
GO:0040008	regulation of growth	26	3	0.87	0.31496
GO:0006672	ceramide metabolic process	5	0	0.17	0.31541
GO:0006979	response to oxidative stress	167	9	5.58	0.31546
GO:0009785	blue light signaling pathway	5	0	0.17	0.31626
GO:0030522	intracellular receptor signaling pathway	5	0	0.17	0.31626
GO:0071483	cellular response to blue light	5	0	0.17	0.31626
GO:0006811	ion transport	775	48	25.88	0.31635
GO:0046916	cellular transition metal ion homeostasis	58	0	1.94	0.31636
GO:0044702	single organism reproductive process	232	10	7.75	0.317
GO:0001736	establishment of planar polarity	1	0	0.03	0.31748
GO:0001738	morphogenesis of a polarized epithelium	1	0	0.03	0.31748
GO:0009942	longitudinal axis specification	1	0	0.03	0.31748
GO:0007164	establishment of tissue polarity	1	0	0.03	0.31748
GO:0002009	morphogenesis of an epithelium	1	0	0.03	0.31748
GO:0048729	tissue morphogenesis	1	0	0.03	0.31748
GO:0071215	cellular response to abscisic acid stimulus	67	7	2.24	0.31776
GO:0006723	cuticle hydrocarbon biosynthetic process	1	0	0.03	0.31799
GO:0042873	aldonate transport	5	1	0.17	0.31806
GO:0048281	inflorescence morphogenesis	4	0	0.13	0.3186
GO:0006536	glutamate metabolic process	13	1	0.43	0.319
GO:0015786	UDP-glucose transport	5	0	0.17	0.31936
GO:0032879	regulation of localization	44	0	1.47	0.31968
GO:0036369	transcription factor catabolic process	1	0	0.03	0.32026
GO:1900424	regulation of defense response to bacterium	1	0	0.03	0.32026
GO:1900425	negative regulation of defense response to bacterium	1	0	0.03	0.32026
GO:1901483	regulation of transcription factor catabolic process	1	0	0.03	0.32026
GO:1901485	positive regulation of transcription factor catabolic process	1	0	0.03	0.32026
GO:0009959	negative gravitropism	5	0	0.17	0.3213
GO:0046483	heterocycle metabolic process	2967	57	99.07	0.32142
GO:0010275	NAD(P)H dehydrogenase complex assembly	1	0	0.03	0.32158
GO:0046168	glycerol-3-phosphate catabolic process	5	0	0.17	0.32166
GO:0030327	prenylated protein catabolic process	1	0	0.03	0.32173
GO:0030328	prenylcysteine catabolic process	1	0	0.03	0.32173
GO:0030329	prenylcysteine metabolic process	1	0	0.03	0.32173
GO:0001927	exocyst assembly	4	0	0.13	0.32194
GO:0010541	acropetal auxin transport	1	0	0.03	0.32284
GO:0010160	formation of animal organ boundary	1	0	0.03	0.32284
GO:0048859	formation of anatomical boundary	1	0	0.03	0.32284
GO:0009870	defense response signaling pathway, resistance gene-dependent	1	0	0.03	0.32306
GO:0048236	plant-type sporogenesis	1	0	0.03	0.32357
GO:0015774	polysaccharide transport	1	0	0.03	0.32387
GO:0080172	petal epidermis patterning	1	0	0.03	0.32483
GO:0006592	ornithine biosynthetic process	1	0	0.03	0.32512
GO:0006750	glutathione biosynthetic process	1	0	0.03	0.32535
GO:0019184	nonribosomal peptide biosynthetic process	1	0	0.03	0.32535
GO:0009073	aromatic amino acid family biosynthetic process	28	3	0.93	0.3256
GO:0050790	regulation of catalytic activity	209	7	6.98	0.32641
GO:0006106	fumarate metabolic process	1	0	0.03	0.32646
GO:0034220	ion transmembrane transport	483	30	16.13	0.32835
GO:0015918	sterol transport	1	0	0.03	0.32988
GO:0097036	regulation of plasma membrane sterol distribution	1	0	0.03	0.32988
GO:0032365	intracellular lipid transport	1	0	0.03	0.32988
GO:0032366	intracellular sterol transport	1	0	0.03	0.32988
GO:0012501	programmed cell death	29	1	0.97	0.33
GO:0046131	pyrimidine ribonucleoside metabolic process	29	2	0.97	0.33141
GO:0019695	choline metabolic process	1	0	0.03	0.33159
GO:0042425	choline biosynthetic process	1	0	0.03	0.33159
GO:0015711	organic anion transport	134	13	4.47	0.33333
GO:0000056	ribosomal small subunit export from nucleus	1	0	0.03	0.33369
GO:0030259	lipid glycosylation	1	0	0.03	0.33437
GO:0040031	snRNA modification	3	0	0.1	0.33448
GO:0031120	snRNA pseudouridine synthesis	3	0	0.1	0.33448
GO:0045934	negative regulation of nucleobase-containing compound metabolic process	48	2	1.6	0.33491
GO:0010440	stomatal lineage progression	4	1	0.13	0.33534
GO:0002682	regulation of immune system process	19	1	0.63	0.33616
GO:0051351	positive regulation of ligase activity	1	0	0.03	0.33708
GO:0051340	regulation of ligase activity	1	0	0.03	0.33708
GO:0031398	positive regulation of protein ubiquitination	1	0	0.03	0.33708
GO:0051443	positive regulation of ubiquitin-protein transferase activity	1	0	0.03	0.33708
GO:0051438	regulation of ubiquitin-protein transferase activity	1	0	0.03	0.33708
GO:1903322	positive regulation of protein modification by small protein conjugation or removal	1	0	0.03	0.33708
GO:0009069	serine family amino acid metabolic process	48	2	1.6	0.33708
GO:0070192	chromosome organization involved in meiotic cell cycle	11	0	0.37	0.33731
GO:0031627	telomeric loop formation	1	0	0.03	0.33814
GO:1990066	energy quenching	2	0	0.07	0.33889
GO:0010196	nonphotochemical quenching	2	0	0.07	0.33889
GO:0006011	UDP-glucose metabolic process	4	0	0.13	0.3393
GO:0000165	MAPK cascade	49	3	1.64	0.33995
GO:0042181	ketone biosynthetic process	14	0	0.47	0.34021
GO:1901661	quinone metabolic process	14	0	0.47	0.34021
GO:1901663	quinone biosynthetic process	14	0	0.47	0.34021
GO:0046164	alcohol catabolic process	16	3	0.53	0.34022
GO:0031047	gene silencing by RNA	30	1	1	0.34041
GO:0022412	cellular process involved in reproduction in multicellular organism	3	0	0.1	0.34081
GO:0018205	peptidyl-lysine modification	45	1	1.5	0.34081
GO:0002237	response to molecule of bacterial origin	3	0	0.1	0.34129
GO:0071216	cellular response to biotic stimulus	3	0	0.1	0.34129
GO:0000338	protein deneddylation	9	1	0.3	0.34148
GO:0010388	protein deneddylation	9	1	0.3	0.34148
GO:0000731	DNA synthesis involved in DNA repair	1	0	0.03	0.342
GO:0009743	response to carbohydrate	18	0	0.6	0.34258
GO:0001678	cellular glucose homeostasis	7	2	0.23	0.34282
GO:0042593	glucose homeostasis	7	2	0.23	0.34282
GO:0007389	pattern specification process	52	4	1.74	0.34293
GO:0042127	regulation of cell proliferation	13	0	0.43	0.34353
GO:0060777	compound leaf morphogenesis	1	0	0.03	0.34421
GO:0045786	negative regulation of cell cycle	12	0	0.4	0.34553
GO:0006825	copper ion transport	10	2	0.33	0.34629
GO:0009767	photosynthetic electron transport chain	32	2	1.07	0.34646
GO:1901137	carbohydrate derivative biosynthetic process	297	8	9.92	0.34658
GO:0000098	sulfur amino acid catabolic process	3	0	0.1	0.34755
GO:0010053	root epidermal cell differentiation	14	0	0.47	0.3477
GO:0009691	cytokinin biosynthetic process	9	1	0.3	0.34915
GO:0006040	amino sugar metabolic process	28	1	0.93	0.34971
GO:0032784	regulation of DNA-templated transcription, elongation	5	1	0.17	0.35008
GO:0009416	response to light stimulus	155	3	5.18	0.35035
GO:0043480	pigment accumulation in tissues	4	0	0.13	0.35072
GO:0043481	anthocyanin accumulation in tissues in response to UV light	4	0	0.13	0.35072
GO:0043476	pigment accumulation	4	0	0.13	0.35072
GO:0043478	pigment accumulation in response to UV light	4	0	0.13	0.35072
GO:0043479	pigment accumulation in tissues in response to UV light	4	0	0.13	0.35072
GO:0048479	style development	2	0	0.07	0.35078
GO:0006566	threonine metabolic process	4	1	0.13	0.3508
GO:0050829	defense response to Gram-negative bacterium	7	0	0.23	0.35096
GO:0046072	dTDP metabolic process	1	0	0.03	0.35096
GO:0046075	dTTP metabolic process	1	0	0.03	0.35096
GO:0046077	dUDP metabolic process	1	0	0.03	0.35096
GO:0006227	dUDP biosynthetic process	1	0	0.03	0.35096
GO:0006233	dTDP biosynthetic process	1	0	0.03	0.35096
GO:0006235	dTTP biosynthetic process	1	0	0.03	0.35096
GO:0009196	pyrimidine deoxyribonucleoside diphosphate metabolic process	1	0	0.03	0.35096
GO:0009197	pyrimidine deoxyribonucleoside diphosphate biosynthetic process	1	0	0.03	0.35096
GO:0009189	deoxyribonucleoside diphosphate biosynthetic process	1	0	0.03	0.35096
GO:0009133	nucleoside diphosphate biosynthetic process	1	0	0.03	0.35096
GO:0009138	pyrimidine nucleoside diphosphate metabolic process	1	0	0.03	0.35096
GO:0009139	pyrimidine nucleoside diphosphate biosynthetic process	1	0	0.03	0.35096
GO:0009212	pyrimidine deoxyribonucleoside triphosphate biosynthetic process	1	0	0.03	0.35096
GO:0009202	deoxyribonucleoside triphosphate biosynthetic process	1	0	0.03	0.35096
GO:0006071	glycerol metabolic process	7	2	0.23	0.35174
GO:0019400	alditol metabolic process	7	2	0.23	0.35174
GO:0071322	cellular response to carbohydrate stimulus	11	0	0.37	0.35174
GO:0010154	fruit development	125	5	4.17	0.35273
GO:0051049	regulation of transport	37	0	1.24	0.35374
GO:0046493	lipid A metabolic process	3	0	0.1	0.35418
GO:1901269	lipooligosaccharide metabolic process	3	0	0.1	0.35418
GO:1901271	lipooligosaccharide biosynthetic process	3	0	0.1	0.35418
GO:0009245	lipid A biosynthetic process	3	0	0.1	0.35418
GO:0044571	[2Fe-2S] cluster assembly	2	0	0.07	0.35427
GO:0006664	glycolipid metabolic process	25	1	0.83	0.3552
GO:0006535	cysteine biosynthetic process from serine	13	0	0.43	0.35533
GO:0019344	cysteine biosynthetic process	13	0	0.43	0.35533
GO:0006574	valine catabolic process	1	0	0.03	0.35552
GO:0046710	GDP metabolic process	1	0	0.03	0.35568
GO:0009185	ribonucleoside diphosphate metabolic process	1	0	0.03	0.35568
GO:0009179	purine ribonucleoside diphosphate metabolic process	1	0	0.03	0.35568
GO:0009135	purine nucleoside diphosphate metabolic process	1	0	0.03	0.35568
GO:2000028	regulation of photoperiodism, flowering	8	0	0.27	0.35605
GO:0035600	tRNA methylthiolation	1	0	0.03	0.35646
GO:0071705	nitrogen compound transport	198	16	6.61	0.35657
GO:1900150	regulation of defense response to fungus	3	1	0.1	0.35691
GO:0050687	negative regulation of defense response to virus	1	0	0.03	0.357
GO:0002698	negative regulation of immune effector process	1	0	0.03	0.357
GO:0001881	receptor recycling	1	0	0.03	0.35755
GO:0043112	receptor metabolic process	1	0	0.03	0.35755
GO:0015942	formate metabolic process	1	0	0.03	0.35793
GO:0042183	formate catabolic process	1	0	0.03	0.35793
GO:0000727	double-strand break repair via break-induced replication	6	0	0.2	0.35799
GO:0009085	lysine biosynthetic process	12	0	0.4	0.35857
GO:0006553	lysine metabolic process	12	0	0.4	0.35857
GO:0042219	cellular modified amino acid catabolic process	8	1	0.27	0.35894
GO:0033523	histone H2B ubiquitination	1	0	0.03	0.35895
GO:0009651	response to salt stress	57	2	1.9	0.35943
GO:0010948	negative regulation of cell cycle process	11	0	0.37	0.35968
GO:0000707	meiotic DNA recombinase assembly	2	0	0.07	0.35977
GO:0035601	protein deacylation	12	0	0.4	0.3613
GO:0033615	mitochondrial proton-transporting ATP synthase complex assembly	1	0	0.03	0.36145
GO:0046901	tetrahydrofolylpolyglutamate biosynthetic process	2	0	0.07	0.36176
GO:0007165	signal transduction	655	23	21.87	0.36226
GO:0016129	phytosteroid biosynthetic process	28	2	0.93	0.36235
GO:0016132	brassinosteroid biosynthetic process	28	2	0.93	0.36235
GO:0009208	pyrimidine ribonucleoside triphosphate metabolic process	16	2	0.53	0.36307
GO:0009209	pyrimidine ribonucleoside triphosphate biosynthetic process	16	2	0.53	0.36307
GO:0000188	inactivation of MAPK activity	2	0	0.07	0.36331
GO:0045717	negative regulation of fatty acid biosynthetic process	1	0	0.03	0.36451
GO:0071156	regulation of cell cycle arrest	1	0	0.03	0.36451
GO:0071158	positive regulation of cell cycle arrest	1	0	0.03	0.36451
GO:0045922	negative regulation of fatty acid metabolic process	1	0	0.03	0.36451
GO:0051607	defense response to virus	5	0	0.17	0.36452
GO:0051130	positive regulation of cellular component organization	25	0	0.83	0.36458
GO:0009405	pathogenesis	3	0	0.1	0.36463
GO:0090305	nucleic acid phosphodiester bond hydrolysis	126	1	4.21	0.36516
GO:0010015	root morphogenesis	37	0	1.24	0.36538
GO:0006177	GMP biosynthetic process	3	0	0.1	0.36559
GO:0006139	nucleobase-containing compound metabolic process	2775	53	92.66	0.36623
GO:0010268	brassinosteroid homeostasis	26	2	0.87	0.36626
GO:0097502	mannosylation	12	0	0.4	0.367
GO:0006366	transcription from RNA polymerase II promoter	147	6	4.91	0.36726
GO:0006612	protein targeting to membrane	19	0	0.63	0.36766
GO:0006333	chromatin assembly or disassembly	50	1	1.67	0.36801
GO:0042176	regulation of protein catabolic process	18	0	0.6	0.3682
GO:0046102	inosine metabolic process	3	1	0.1	0.36841
GO:0033157	regulation of intracellular protein transport	3	0	0.1	0.36846
GO:0090316	positive regulation of intracellular protein transport	3	0	0.1	0.36846
GO:0046822	regulation of nucleocytoplasmic transport	3	0	0.1	0.36846
GO:0046824	positive regulation of nucleocytoplasmic transport	3	0	0.1	0.36846
GO:0046825	regulation of protein export from nucleus	3	0	0.1	0.36846
GO:0046827	positive regulation of protein export from nucleus	3	0	0.1	0.36846
GO:0070201	regulation of establishment of protein localization	3	0	0.1	0.36846
GO:0051222	positive regulation of protein transport	3	0	0.1	0.36846
GO:0051223	regulation of protein transport	3	0	0.1	0.36846
GO:0032388	positive regulation of intracellular transport	3	0	0.1	0.36846
GO:0033962	cytoplasmic mRNA processing body assembly	6	0	0.2	0.36869
GO:0010204	defense response signaling pathway, resistance gene-independent	1	0	0.03	0.36876
GO:0009910	negative regulation of flower development	6	0	0.2	0.36966
GO:0000160	phosphorelay signal transduction system	55	2	1.84	0.37007
GO:0009958	positive gravitropism	11	0	0.37	0.37019
GO:0009867	jasmonic acid mediated signaling pathway	11	1	0.37	0.37022
GO:0071395	cellular response to jasmonic acid stimulus	11	1	0.37	0.37022
GO:0072531	pyrimidine-containing compound transmembrane transport	2	0	0.07	0.37068
GO:0015855	pyrimidine nucleobase transport	2	0	0.07	0.37068
GO:0015857	uracil transport	2	0	0.07	0.37068
GO:0051259	protein oligomerization	10	0	0.33	0.37122
GO:0019511	peptidyl-proline hydroxylation	1	0	0.03	0.37146
GO:0018126	protein hydroxylation	1	0	0.03	0.37146
GO:0009643	photosynthetic acclimation	2	0	0.07	0.37214
GO:0035246	peptidyl-arginine N-methylation	4	0	0.13	0.3732
GO:0006487	protein N-linked glycosylation	23	0	0.77	0.37469
GO:0010114	response to red light	8	0	0.27	0.37512
GO:0016441	posttranscriptional gene silencing	25	1	0.83	0.37577
GO:0015780	nucleotide-sugar transport	11	0	0.37	0.37607
GO:0010252	auxin homeostasis	11	1	0.37	0.37616
GO:0043157	response to cation stress	3	0	0.1	0.3763
GO:0048581	negative regulation of post-embryonic development	18	1	0.6	0.37638
GO:0051241	negative regulation of multicellular organismal process	18	1	0.6	0.37638
GO:0044700	single organism signaling	657	23	21.94	0.37803
GO:0023052	signaling	657	23	21.94	0.37803
GO:0048878	chemical homeostasis	237	12	7.91	0.37836
GO:0000451	rRNA 2'-O-methylation	2	0	0.07	0.37924
GO:0000453	enzyme-directed rRNA 2'-O-methylation	2	0	0.07	0.37924
GO:0000469	cleavage involved in rRNA processing	12	1	0.4	0.37961
GO:0019751	polyol metabolic process	24	3	0.8	0.38037
GO:0009186	deoxyribonucleoside diphosphate metabolic process	3	0	0.1	0.38055
GO:0010286	heat acclimation	4	0	0.13	0.38079
GO:0007049	cell cycle	209	1	6.98	0.38105
GO:0009893	positive regulation of metabolic process	141	1	4.71	0.38114
GO:0031325	positive regulation of cellular metabolic process	141	1	4.71	0.38114
GO:0032889	regulation of vacuole fusion, non-autophagic	1	0	0.03	0.38208
GO:0051469	vesicle fusion with vacuole	1	0	0.03	0.38208
GO:0044088	regulation of vacuole organization	1	0	0.03	0.38208
GO:0045992	negative regulation of embryonic development	1	0	0.03	0.38208
GO:0071229	cellular response to acid chemical	93	8	3.11	0.3823
GO:0071396	cellular response to lipid	99	8	3.31	0.38294
GO:0009700	indole phytoalexin biosynthetic process	2	1	0.07	0.38374
GO:0046217	indole phytoalexin metabolic process	2	1	0.07	0.38374
GO:0080136	priming of cellular response to stress	2	1	0.07	0.38374
GO:0000169	activation of MAPK activity involved in osmosensory signaling pathway	2	1	0.07	0.38374
GO:0052314	phytoalexin metabolic process	2	1	0.07	0.38374
GO:0052315	phytoalexin biosynthetic process	2	1	0.07	0.38374
GO:0052317	camalexin metabolic process	2	1	0.07	0.38374
GO:0010120	camalexin biosynthetic process	2	1	0.07	0.38374
GO:0009798	axis specification	10	1	0.33	0.38374
GO:0060560	developmental growth involved in morphogenesis	36	0	1.2	0.38379
GO:0034498	early endosome to Golgi transport	1	0	0.03	0.38474
GO:0000103	sulfate assimilation	23	0	0.77	0.38549
GO:0052543	callose deposition in cell wall	1	0	0.03	0.3862
GO:0052545	callose localization	1	0	0.03	0.3862
GO:0052386	cell wall thickening	1	0	0.03	0.3862
GO:0006885	regulation of pH	47	3	1.57	0.3867
GO:0036071	N-glycan fucosylation	1	0	0.03	0.38709
GO:0090355	positive regulation of auxin metabolic process	3	0	0.1	0.38758
GO:0007059	chromosome segregation	21	0	0.7	0.38768
GO:0016973	poly(A)+ mRNA export from nucleus	2	0	0.07	0.38814
GO:0033609	oxalate metabolic process	27	2	0.9	0.38857
GO:0018393	internal peptidyl-lysine acetylation	31	1	1.04	0.3887
GO:0018394	peptidyl-lysine acetylation	31	1	1.04	0.3887
GO:0016573	histone acetylation	31	1	1.04	0.3887
GO:1901700	response to oxygen-containing compound	354	23	11.82	0.38883
GO:0010054	trichoblast differentiation	11	0	0.37	0.38884
GO:0019953	sexual reproduction	19	0	0.63	0.38913
GO:0018202	peptidyl-histidine modification	12	1	0.4	0.38986
GO:0043555	regulation of translation in response to stress	1	0	0.03	0.39074
GO:0080149	sucrose induced translational repression	1	0	0.03	0.39074
GO:0032055	negative regulation of translation in response to stress	1	0	0.03	0.39074
GO:0044272	sulfur compound biosynthetic process	98	5	3.27	0.39089
GO:0018198	peptidyl-cysteine modification	7	0	0.23	0.39104
GO:0015713	phosphoglycerate transport	4	1	0.13	0.39147
GO:0003002	regionalization	44	4	1.47	0.39197
GO:0033587	shikimate biosynthetic process	5	0	0.17	0.39202
GO:0006084	acetyl-CoA metabolic process	14	0	0.47	0.3922
GO:2000022	regulation of jasmonic acid mediated signaling pathway	1	0	0.03	0.3922
GO:0000280	nuclear division	59	0	1.97	0.39224
GO:0006423	cysteinyl-tRNA aminoacylation	1	0	0.03	0.39228
GO:0051026	chiasma assembly	2	0	0.07	0.39239
GO:0042559	pteridine-containing compound biosynthetic process	16	0	0.53	0.39346
GO:0045005	DNA-dependent DNA replication maintenance of fidelity	3	0	0.1	0.39387
GO:0008356	asymmetric cell division	3	0	0.1	0.39486
GO:0042026	protein refolding	15	0	0.5	0.39493
GO:0019692	deoxyribose phosphate metabolic process	6	0	0.2	0.39498
GO:0009394	2'-deoxyribonucleotide metabolic process	6	0	0.2	0.39498
GO:0031123	RNA 3'-end processing	34	0	1.14	0.39564
GO:0009089	lysine biosynthetic process via diaminopimelate	11	0	0.37	0.39614
GO:0030245	cellulose catabolic process	15	1	0.5	0.39645
GO:0030643	cellular phosphate ion homeostasis	1	0	0.03	0.39653
GO:0072502	cellular trivalent inorganic anion homeostasis	1	0	0.03	0.39653
GO:0072506	trivalent inorganic anion homeostasis	1	0	0.03	0.39653
GO:0046475	glycerophospholipid catabolic process	1	0	0.03	0.39653
GO:0030002	cellular anion homeostasis	1	0	0.03	0.39653
GO:0009395	phospholipid catabolic process	1	0	0.03	0.39653
GO:0046503	glycerolipid catabolic process	1	0	0.03	0.39653
GO:0055062	phosphate ion homeostasis	1	0	0.03	0.39653
GO:0046499	S-adenosylmethioninamine metabolic process	5	0	0.17	0.39669
GO:0006557	S-adenosylmethioninamine biosynthetic process	5	0	0.17	0.39669
GO:0060359	response to ammonium ion	4	0	0.13	0.3969
GO:0048569	post-embryonic animal organ development	64	3	2.14	0.39782
GO:0050896	response to stimulus	1971	68	65.81	0.39818
GO:0051238	sequestering of metal ion	15	0	0.5	0.39827
GO:0009911	positive regulation of flower development	11	0	0.37	0.39838
GO:2000243	positive regulation of reproductive process	11	0	0.37	0.39838
GO:1900865	chloroplast RNA modification	2	0	0.07	0.39956
GO:0015716	organic phosphonate transport	4	1	0.13	0.39989
GO:0006534	cysteine metabolic process	16	0	0.53	0.40032
GO:0040007	growth	107	3	3.57	0.40129
GO:0046400	keto-3-deoxy-D-manno-octulosonic acid metabolic process	1	0	0.03	0.40146
GO:0010396	rhamnogalacturonan II metabolic process	1	0	0.03	0.40146
GO:0010306	rhamnogalacturonan II biosynthetic process	1	0	0.03	0.40146
GO:0019294	keto-3-deoxy-D-manno-octulosonic acid biosynthetic process	1	0	0.03	0.40146
GO:1901699	cellular response to nitrogen compound	19	1	0.63	0.4017
GO:0009699	phenylpropanoid biosynthetic process	87	6	2.91	0.40179
GO:0032787	monocarboxylic acid metabolic process	378	25	12.62	0.40265
GO:0006694	steroid biosynthetic process	42	2	1.4	0.40309
GO:0042991	transcription factor import into nucleus	1	0	0.03	0.40327
GO:0046900	tetrahydrofolylpolyglutamate metabolic process	3	0	0.1	0.40354
GO:0072507	divalent inorganic cation homeostasis	15	1	0.5	0.40369
GO:0001523	retinoid metabolic process	2	0	0.07	0.40481
GO:0042572	retinol metabolic process	2	0	0.07	0.40481
GO:0009908	flower development	86	5	2.87	0.40501
GO:0006220	pyrimidine nucleotide metabolic process	39	2	1.3	0.40618
GO:0006221	pyrimidine nucleotide biosynthetic process	39	2	1.3	0.40618
GO:0006986	response to unfolded protein	13	1	0.43	0.40618
GO:0035966	response to topologically incorrect protein	13	1	0.43	0.40618
GO:0010375	stomatal complex patterning	3	0	0.1	0.40626
GO:0000462	maturation of SSU-rRNA from tricistronic rRNA transcript (SSU-rRNA, 5.8S rRNA, LSU-rRNA)	35	0	1.17	0.40639
GO:0009584	detection of visible light	4	0	0.13	0.40657
GO:0006643	membrane lipid metabolic process	36	1	1.2	0.40741
GO:0048285	organelle fission	78	0	2.6	0.40816
GO:0034470	ncRNA processing	253	3	8.45	0.40825
GO:0009108	coenzyme biosynthetic process	94	2	3.14	0.40837
GO:0035266	meristem growth	13	1	0.43	0.40885
GO:0009838	abscission	1	0	0.03	0.40981
GO:0010227	floral organ abscission	1	0	0.03	0.40981
GO:0006396	RNA processing	488	5	16.3	0.41037
GO:0065004	protein-DNA complex assembly	66	2	2.2	0.41051
GO:0005978	glycogen biosynthetic process	13	0	0.43	0.4106
GO:0050688	regulation of defense response to virus	3	0	0.1	0.41221
GO:0002697	regulation of immune effector process	3	0	0.1	0.41221
GO:0006213	pyrimidine nucleoside metabolic process	35	2	1.17	0.41315
GO:0043405	regulation of MAP kinase activity	6	1	0.2	0.41367
GO:0009233	menaquinone metabolic process	1	0	0.03	0.41414
GO:0009234	menaquinone biosynthetic process	1	0	0.03	0.41414
GO:0006751	glutathione catabolic process	7	1	0.23	0.41473
GO:0007033	vacuole organization	17	0	0.57	0.41536
GO:0000041	transition metal ion transport	47	4	1.57	0.41616
GO:0000904	cell morphogenesis involved in differentiation	17	0	0.57	0.41647
GO:0019499	cyanide metabolic process	1	0	0.03	0.41673
GO:0006164	purine nucleotide biosynthetic process	136	3	4.54	0.41676
GO:1902584	positive regulation of response to water deprivation	2	1	0.07	0.41686
GO:0009250	glucan biosynthetic process	65	1	2.17	0.41741
GO:0006970	response to osmotic stress	71	3	2.37	0.41742
GO:0051235	maintenance of location	44	0	1.47	0.41752
GO:0009642	response to light intensity	24	0	0.8	0.41793
GO:0046839	phospholipid dephosphorylation	7	0	0.23	0.41837
GO:0052646	alditol phosphate metabolic process	13	2	0.43	0.41878
GO:0006544	glycine metabolic process	22	1	0.73	0.41984
GO:0000422	autophagy of mitochondrion	9	0	0.3	0.41995
GO:0015991	ATP hydrolysis coupled proton transport	58	3	1.94	0.42013
GO:0015988	energy coupled proton transmembrane transport, against electrochemical gradient	58	3	1.94	0.42013
GO:0097428	protein maturation by iron-sulfur cluster transfer	4	0	0.13	0.42025
GO:0034614	cellular response to reactive oxygen species	90	6	3.01	0.42184
GO:0097576	vacuole fusion	5	0	0.17	0.42228
GO:1902074	response to salt	1	0	0.03	0.42252
GO:0046685	response to arsenic-containing substance	6	1	0.2	0.42346
GO:0045493	xylan catabolic process	7	0	0.23	0.42361
GO:1902475	L-alpha-amino acid transmembrane transport	5	1	0.17	0.42367
GO:0045048	protein insertion into ER membrane	1	0	0.03	0.42404
GO:0070682	proteasome regulatory particle assembly	1	0	0.03	0.4248
GO:0009880	embryonic pattern specification	6	0	0.2	0.42518
GO:0032200	telomere organization	15	0	0.5	0.42565
GO:0060249	anatomical structure homeostasis	15	0	0.5	0.42565
GO:0000723	telomere maintenance	15	0	0.5	0.42565
GO:0031146	SCF-dependent proteasomal ubiquitin-dependent protein catabolic process	13	1	0.43	0.42605
GO:0019217	regulation of fatty acid metabolic process	3	0	0.1	0.42616
GO:0035066	positive regulation of histone acetylation	3	0	0.1	0.42616
GO:1901985	positive regulation of protein acetylation	3	0	0.1	0.42616
GO:2000758	positive regulation of peptidyl-lysine acetylation	3	0	0.1	0.42616
GO:0006426	glycyl-tRNA aminoacylation	2	0	0.07	0.42632
GO:0010207	photosystem II assembly	10	0	0.33	0.42634
GO:0036115	fatty-acyl-CoA catabolic process	1	0	0.03	0.4264
GO:1902190	2-methylbutanoyl-CoA(4-) catabolic process	1	0	0.03	0.4264
GO:1902192	2-methylbut-2-enoyl-CoA(4-) metabolic process	1	0	0.03	0.4264
GO:1902189	2-methylbutanoyl-CoA(4-) metabolic process	1	0	0.03	0.4264
GO:0009109	coenzyme catabolic process	1	0	0.03	0.4264
GO:0006471	protein ADP-ribosylation	1	0	0.03	0.42657
GO:0034397	telomere localization	1	0	0.03	0.42674
GO:0034398	telomere tethering at nuclear periphery	1	0	0.03	0.42674
GO:0000973	posttranscriptional tethering of RNA polymerase II gene DNA at nuclear periphery	1	0	0.03	0.42674
GO:0050000	chromosome localization	1	0	0.03	0.42674
GO:0035065	regulation of histone acetylation	10	0	0.33	0.42677
GO:1901983	regulation of protein acetylation	10	0	0.33	0.42677
GO:2000756	regulation of peptidyl-lysine acetylation	10	0	0.33	0.42677
GO:0017148	negative regulation of translation	16	0	0.53	0.42681
GO:0043413	macromolecule glycosylation	58	1	1.94	0.42717
GO:0006486	protein glycosylation	58	1	1.94	0.42717
GO:0019336	phenol-containing compound catabolic process	2	0	0.07	0.42757
GO:0016558	protein import into peroxisome matrix	13	0	0.43	0.42771
GO:0009165	nucleotide biosynthetic process	201	6	6.71	0.42832
GO:0051205	protein insertion into membrane	3	0	0.1	0.42919
GO:0000478	endonucleolytic cleavage involved in rRNA processing	8	1	0.27	0.42939
GO:0000479	endonucleolytic cleavage of tricistronic rRNA transcript (SSU-rRNA, 5.8S rRNA, LSU-rRNA)	8	1	0.27	0.42939
GO:0043550	regulation of lipid kinase activity	1	0	0.03	0.42953
GO:0044275	cellular carbohydrate catabolic process	42	5	1.4	0.42975
GO:1900911	regulation of olefin biosynthetic process	4	0	0.13	0.42979
GO:1900908	regulation of olefin metabolic process	4	0	0.13	0.42979
GO:0010364	regulation of ethylene biosynthetic process	4	0	0.13	0.42979
GO:0031335	regulation of sulfur amino acid metabolic process	4	0	0.13	0.42979
GO:0019216	regulation of lipid metabolic process	11	0	0.37	0.43123
GO:0006491	N-glycan processing	5	0	0.17	0.43177
GO:0006086	acetyl-CoA biosynthetic process from pyruvate	8	0	0.27	0.43182
GO:0009934	regulation of meristem structural organization	5	1	0.17	0.43242
GO:0009605	response to external stimulus	226	11	7.55	0.43255
GO:0016128	phytosteroid metabolic process	30	2	1	0.43391
GO:0016131	brassinosteroid metabolic process	30	2	1	0.43391
GO:0016458	gene silencing	60	3	2	0.43486
GO:0016572	histone phosphorylation	4	0	0.13	0.43506
GO:0006613	cotranslational protein targeting to membrane	13	0	0.43	0.437
GO:0006614	SRP-dependent cotranslational protein targeting to membrane	13	0	0.43	0.437
GO:0044724	single-organism carbohydrate catabolic process	116	10	3.87	0.4382
GO:0009646	response to absence of light	5	0	0.17	0.43883
GO:0009142	nucleoside triphosphate biosynthetic process	119	4	3.97	0.43918
GO:0009626	plant-type hypersensitive response	12	1	0.4	0.4402
GO:0034050	host programmed cell death induced by symbiont	12	1	0.4	0.4402
GO:0051445	regulation of meiotic cell cycle	2	0	0.07	0.44039
GO:0000389	mRNA 3'-splice site recognition	2	0	0.07	0.44051
GO:0000303	response to superoxide	21	1	0.7	0.44064
GO:0000305	response to oxygen radical	21	1	0.7	0.44064
GO:0071450	cellular response to oxygen radical	21	1	0.7	0.44064
GO:0071451	cellular response to superoxide	21	1	0.7	0.44064
GO:0019430	removal of superoxide radicals	21	1	0.7	0.44064
GO:0010235	guard mother cell cytokinesis	3	0	0.1	0.4407
GO:0009850	auxin metabolic process	9	0	0.3	0.44093
GO:0010604	positive regulation of macromolecule metabolic process	129	1	4.31	0.44137
GO:0006085	acetyl-CoA biosynthetic process	13	0	0.43	0.4417
GO:0033500	carbohydrate homeostasis	9	2	0.3	0.44179
GO:0006207	'de novo' pyrimidine nucleobase biosynthetic process	7	0	0.23	0.44206
GO:0010321	regulation of vegetative phase change	2	0	0.07	0.4427
GO:0009695	jasmonic acid biosynthetic process	4	1	0.13	0.44276
GO:1901617	organic hydroxy compound biosynthetic process	80	3	2.67	0.44366
GO:0009129	pyrimidine nucleoside monophosphate metabolic process	18	0	0.6	0.44412
GO:0009130	pyrimidine nucleoside monophosphate biosynthetic process	18	0	0.6	0.44412
GO:0070085	glycosylation	68	1	2.27	0.44472
GO:0055080	cation homeostasis	127	6	4.24	0.44589
GO:0045088	regulation of innate immune response	16	1	0.53	0.44608
GO:0050776	regulation of immune response	16	1	0.53	0.44608
GO:0007100	mitotic centrosome separation	1	0	0.03	0.44627
GO:0051299	centrosome separation	1	0	0.03	0.44627
GO:0046602	regulation of mitotic centrosome separation	1	0	0.03	0.44627
GO:0046604	positive regulation of mitotic centrosome separation	1	0	0.03	0.44627
GO:0046605	regulation of centrosome cycle	1	0	0.03	0.44627
GO:0046607	positive regulation of centrosome cycle	1	0	0.03	0.44627
GO:0019284	L-methionine salvage from S-adenosylmethionine	1	0	0.03	0.44636
GO:0051726	regulation of cell cycle	60	0	2	0.44688
GO:0046654	tetrahydrofolate biosynthetic process	7	0	0.23	0.44837
GO:0080009	mRNA methylation	2	0	0.07	0.44945
GO:0032409	regulation of transporter activity	4	0	0.13	0.45042
GO:0022898	regulation of transmembrane transporter activity	4	0	0.13	0.45042
GO:0034762	regulation of transmembrane transport	4	0	0.13	0.45042
GO:0034765	regulation of ion transmembrane transport	4	0	0.13	0.45042
GO:0010359	regulation of anion channel activity	4	0	0.13	0.45042
GO:0032412	regulation of ion transmembrane transporter activity	4	0	0.13	0.45042
GO:0006767	water-soluble vitamin metabolic process	32	0	1.07	0.45066
GO:0007067	mitotic cell cycle	34	0	1.14	0.45075
GO:0030258	lipid modification	56	1	1.87	0.4508
GO:0010274	hydrotropism	2	0	0.07	0.45085
GO:2000280	regulation of root development	11	0	0.37	0.45115
GO:0000226	microtubule cytoskeleton organization	51	1	1.7	0.45138
GO:0080175	phragmoplast microtubule organization	1	0	0.03	0.45171
GO:0055075	potassium ion homeostasis	5	0	0.17	0.45225
GO:0046386	deoxyribose phosphate catabolic process	2	0	0.07	0.45312
GO:0070507	regulation of microtubule cytoskeleton organization	2	0	0.07	0.45318
GO:1901362	organic cyclic compound biosynthetic process	1488	50	49.69	0.45381
GO:0060919	auxin influx	3	0	0.1	0.45577
GO:0009920	cell plate formation involved in plant-type cell wall biogenesis	1	0	0.03	0.45717
GO:0006817	phosphate ion transport	9	0	0.3	0.45756
GO:0042744	hydrogen peroxide catabolic process	61	5	2.04	0.45777
GO:0034660	ncRNA metabolic process	326	5	10.89	0.45801
GO:0006475	internal protein amino acid acetylation	32	1	1.07	0.45879
GO:0042144	vacuole fusion, non-autophagic	3	0	0.1	0.45898
GO:0048522	positive regulation of cellular process	166	1	5.54	0.45953
GO:0080170	hydrogen peroxide transmembrane transport	1	0	0.03	0.45995
GO:0050832	defense response to fungus	55	4	1.84	0.46039
GO:0009201	ribonucleoside triphosphate biosynthetic process	117	4	3.91	0.46048
GO:0042592	homeostatic process	349	12	11.65	0.46129
GO:0010017	red or far-red light signaling pathway	9	0	0.3	0.46185
GO:0071489	cellular response to red or far red light	9	0	0.3	0.46185
GO:0006474	N-terminal protein amino acid acetylation	17	0	0.57	0.46192
GO:0000053	argininosuccinate metabolic process	1	0	0.03	0.4623
GO:0000060	protein import into nucleus, translocation	5	0	0.17	0.46238
GO:0006610	ribosomal protein import into nucleus	5	0	0.17	0.46238
GO:0060341	regulation of cellular localization	6	0	0.2	0.4624
GO:0071824	protein-DNA complex subunit organization	68	2	2.27	0.46277
GO:1901293	nucleoside phosphate biosynthetic process	207	6	6.91	0.46342
GO:0006928	movement of cell or subcellular component	62	0	2.07	0.46364
GO:0007018	microtubule-based movement	62	0	2.07	0.46364
GO:0006525	arginine metabolic process	14	0	0.47	0.46376
GO:0010384	cell wall proteoglycan metabolic process	1	0	0.03	0.46579
GO:0010404	cell wall hydroxyproline-rich glycoprotein metabolic process	1	0	0.03	0.46579
GO:0010405	arabinogalactan protein metabolic process	1	0	0.03	0.46579
GO:0018258	protein O-linked glycosylation via hydroxyproline	1	0	0.03	0.46579
GO:0019720	Mo-molybdopterin cofactor metabolic process	7	0	0.23	0.46592
GO:0043545	molybdopterin cofactor metabolic process	7	0	0.23	0.46592
GO:0006777	Mo-molybdopterin cofactor biosynthetic process	7	0	0.23	0.46592
GO:0051189	prosthetic group metabolic process	7	0	0.23	0.46592
GO:0032324	molybdopterin cofactor biosynthetic process	7	0	0.23	0.46592
GO:0097359	UDP-glucosylation	1	0	0.03	0.4664
GO:0044205	'de novo' UMP biosynthetic process	3	0	0.1	0.46724
GO:0000460	maturation of 5.8S rRNA	18	1	0.6	0.46741
GO:0006020	inositol metabolic process	10	1	0.33	0.46761
GO:0043647	inositol phosphate metabolic process	10	0	0.33	0.46761
GO:0017121	phospholipid scrambling	1	0	0.03	0.4678
GO:0048024	regulation of mRNA splicing, via spliceosome	7	0	0.23	0.46801
GO:0000380	alternative mRNA splicing, via spliceosome	7	0	0.23	0.46801
GO:0000381	regulation of alternative mRNA splicing, via spliceosome	7	0	0.23	0.46801
GO:0010087	phloem or xylem histogenesis	20	2	0.67	0.46817
GO:0009645	response to low light intensity stimulus	2	0	0.07	0.46888
GO:0097437	maintenance of dormancy	2	0	0.07	0.46888
GO:0032958	inositol phosphate biosynthetic process	2	0	0.07	0.46888
GO:0010231	maintenance of seed dormancy	2	0	0.07	0.46888
GO:0071478	cellular response to radiation	22	0	0.73	0.46972
GO:0046931	pore complex assembly	1	0	0.03	0.47017
GO:0051292	nuclear pore complex assembly	1	0	0.03	0.47017
GO:0007167	enzyme linked receptor protein signaling pathway	2	0	0.07	0.47024
GO:0015700	arsenite transport	2	0	0.07	0.47037
GO:0044070	regulation of anion transport	9	0	0.3	0.47051
GO:0006302	double-strand break repair	40	0	1.34	0.4711
GO:0046132	pyrimidine ribonucleoside biosynthetic process	26	2	0.87	0.47143
GO:0009264	deoxyribonucleotide catabolic process	3	0	0.1	0.47169
GO:0033521	phytyl diphosphate biosynthetic process	1	0	0.03	0.47192
GO:0033519	phytyl diphosphate metabolic process	1	0	0.03	0.47192
GO:0048831	regulation of shoot system development	38	0	1.27	0.47246
GO:0045454	cell redox homeostasis	97	0	3.24	0.47284
GO:0002253	activation of immune response	9	1	0.3	0.47402
GO:0045089	positive regulation of innate immune response	9	1	0.3	0.47402
GO:0002218	activation of innate immune response	9	1	0.3	0.47402
GO:0002684	positive regulation of immune system process	9	1	0.3	0.47402
GO:0031349	positive regulation of defense response	9	1	0.3	0.47402
GO:0050778	positive regulation of immune response	9	1	0.3	0.47402
GO:0006266	DNA ligation	9	0	0.3	0.47417
GO:0043570	maintenance of DNA repeat elements	2	0	0.07	0.47509
GO:0045910	negative regulation of DNA recombination	2	0	0.07	0.47509
GO:0006537	glutamate biosynthetic process	4	0	0.13	0.47518
GO:0072523	purine-containing compound catabolic process	61	4	2.04	0.47553
GO:0080005	photosystem stoichiometry adjustment	1	0	0.03	0.47693
GO:0071461	cellular response to redox state	1	0	0.03	0.47693
GO:0051775	response to redox state	1	0	0.03	0.47693
GO:0046364	monosaccharide biosynthetic process	12	1	0.4	0.47719
GO:0048571	long-day photoperiodism	11	0	0.37	0.47745
GO:0009937	regulation of gibberellic acid mediated signaling pathway	8	0	0.27	0.47835
GO:0010608	posttranscriptional regulation of gene expression	108	1	3.61	0.47846
GO:0071901	negative regulation of protein serine/threonine kinase activity	5	0	0.17	0.47925
GO:0042743	hydrogen peroxide metabolic process	63	5	2.1	0.47943
GO:0055074	calcium ion homeostasis	8	1	0.27	0.47963
GO:0035281	pre-miRNA export from nucleus	1	0	0.03	0.47967
GO:0006448	regulation of translational elongation	16	0	0.53	0.48021
GO:0048481	plant ovule development	11	2	0.37	0.48061
GO:0035670	plant-type ovary development	11	2	0.37	0.48061
GO:0009414	response to water deprivation	41	3	1.37	0.48093
GO:0001101	response to acid chemical	201	15	6.71	0.48174
GO:0036079	purine nucleotide-sugar transport	4	0	0.13	0.48277
GO:0034644	cellular response to UV	1	0	0.03	0.48294
GO:0071493	cellular response to UV-B	1	0	0.03	0.48294
GO:0010101	post-embryonic root morphogenesis	12	0	0.4	0.48303
GO:0010102	lateral root morphogenesis	12	0	0.4	0.48303
GO:0072503	cellular divalent inorganic cation homeostasis	12	0	0.4	0.48408
GO:0009741	response to brassinosteroid	30	1	1	0.48451
GO:0065008	regulation of biological quality	524	17	17.5	0.48453
GO:0080147	root hair cell development	4	0	0.13	0.48547
GO:0010646	regulation of cell communication	88	4	2.94	0.48548
GO:0023051	regulation of signaling	88	4	2.94	0.48548
GO:0016559	peroxisome fission	4	0	0.13	0.48595
GO:1901657	glycosyl compound metabolic process	314	9	10.48	0.4861
GO:0009132	nucleoside diphosphate metabolic process	8	0	0.27	0.48661
GO:0042364	water-soluble vitamin biosynthetic process	30	0	1	0.48702
GO:1901070	guanosine-containing compound biosynthetic process	7	0	0.23	0.4874
GO:0016121	carotene catabolic process	1	0	0.03	0.48772
GO:0016124	xanthophyll catabolic process	1	0	0.03	0.48772
GO:0016110	tetraterpenoid catabolic process	1	0	0.03	0.48772
GO:0016118	carotenoid catabolic process	1	0	0.03	0.48772
GO:0046247	terpene catabolic process	1	0	0.03	0.48772
GO:0051697	protein delipidation	2	0	0.07	0.48827
GO:0071219	cellular response to molecule of bacterial origin	2	0	0.07	0.4884
GO:0006661	phosphatidylinositol biosynthetic process	20	0	0.67	0.48841
GO:0046040	IMP metabolic process	15	1	0.5	0.48852
GO:0018195	peptidyl-arginine modification	5	0	0.17	0.48856
GO:0018216	peptidyl-arginine methylation	5	0	0.17	0.48856
GO:2000279	negative regulation of DNA biosynthetic process	1	0	0.03	0.48905
GO:0019218	regulation of steroid metabolic process	2	0	0.07	0.48921
GO:0090030	regulation of steroid hormone biosynthetic process	2	0	0.07	0.48921
GO:0010422	regulation of brassinosteroid biosynthetic process	2	0	0.07	0.48921
GO:0050810	regulation of steroid biosynthetic process	2	0	0.07	0.48921
GO:0009845	seed germination	28	3	0.93	0.48934
GO:0030970	retrograde protein transport, ER to cytosol	2	0	0.07	0.48971
GO:0009440	cyanate catabolic process	1	0	0.03	0.48985
GO:0009439	cyanate metabolic process	1	0	0.03	0.48985
GO:0070084	protein initiator methionine removal	7	0	0.23	0.49082
GO:0042391	regulation of membrane potential	19	0	0.63	0.49174
GO:0007131	reciprocal meiotic recombination	16	0	0.53	0.49227
GO:0046355	mannan catabolic process	7	1	0.23	0.49277
GO:0010412	mannan metabolic process	7	1	0.23	0.49277
GO:0032504	multicellular organism reproduction	17	0	0.57	0.49281
GO:0006950	response to stress	878	35	29.32	0.49331
GO:0006189	'de novo' IMP biosynthetic process	10	0	0.33	0.49375
GO:0009415	response to water	45	4	1.5	0.49395
GO:1902456	regulation of stomatal opening	4	1	0.13	0.49435
GO:0090567	reproductive shoot system development	92	5	3.07	0.49462
GO:0090480	purine nucleotide-sugar transmembrane transport	3	0	0.1	0.49539
GO:0019520	aldonic acid metabolic process	2	0	0.07	0.49569
GO:0046176	aldonic acid catabolic process	2	0	0.07	0.49569
GO:2000033	regulation of seed dormancy process	1	0	0.03	0.4959
GO:0046365	monosaccharide catabolic process	23	1	0.77	0.49608
GO:0019320	hexose catabolic process	23	1	0.77	0.49608
GO:0051260	protein homooligomerization	4	0	0.13	0.49649
GO:0006766	vitamin metabolic process	35	0	1.17	0.49668
GO:0055067	monovalent inorganic cation homeostasis	54	3	1.8	0.49694
GO:0006505	GPI anchor metabolic process	14	0	0.47	0.49706
GO:0006506	GPI anchor biosynthetic process	14	0	0.47	0.49706
GO:0009846	pollen germination	9	0	0.3	0.49709
GO:0016197	endosomal transport	38	0	1.27	0.49717
GO:0006468	protein phosphorylation	721	24	24.08	0.49763
GO:0071586	CAAX-box protein processing	5	0	0.17	0.49771
GO:0080120	CAAX-box protein maturation	5	0	0.17	0.49771
GO:0009311	oligosaccharide metabolic process	52	2	1.74	0.49785
GO:0043171	peptide catabolic process	14	1	0.47	0.49835
GO:0010411	xyloglucan metabolic process	19	3	0.63	0.49984
GO:0030003	cellular cation homeostasis	107	3	3.57	0.50058
GO:0051480	regulation of cytosolic calcium ion concentration	3	0	0.1	0.50127
GO:0016052	carbohydrate catabolic process	203	14	6.78	0.50169
GO:0035336	long-chain fatty-acyl-CoA metabolic process	7	0	0.23	0.50222
GO:0009904	chloroplast accumulation movement	7	0	0.23	0.50293
GO:0015994	chlorophyll metabolic process	23	0	0.77	0.50333
GO:1901615	organic hydroxy compound metabolic process	134	6	4.47	0.50347
GO:2000142	regulation of DNA-templated transcription, initiation	8	0	0.27	0.50384
GO:0060260	regulation of transcription initiation from RNA polymerase II promoter	8	0	0.27	0.50384
GO:1901360	organic cyclic compound metabolic process	3127	69	104.42	0.50428
GO:0080180	2-methylguanosine metabolic process	1	0	0.03	0.50466
GO:0046520	sphingoid biosynthetic process	1	0	0.03	0.50493
GO:0046519	sphingoid metabolic process	1	0	0.03	0.50493
GO:0051321	meiotic cell cycle	38	0	1.27	0.50497
GO:0009627	systemic acquired resistance	7	0	0.23	0.50693
GO:0090322	regulation of superoxide metabolic process	2	0	0.07	0.50695
GO:0009070	serine family amino acid biosynthetic process	25	1	0.83	0.50776
GO:0009124	nucleoside monophosphate biosynthetic process	144	3	4.81	0.50808
GO:0044264	cellular polysaccharide metabolic process	140	8	4.67	0.50825
GO:0010387	COP9 signalosome assembly	2	0	0.07	0.50891
GO:0055082	cellular chemical homeostasis	156	5	5.21	0.50902
GO:0010039	response to iron ion	11	0	0.37	0.5092
GO:0000045	autophagosome assembly	7	0	0.23	0.5093
GO:0018410	C-terminal protein amino acid modification	7	0	0.23	0.5093
GO:0009966	regulation of signal transduction	87	4	2.91	0.50941
GO:0046036	CTP metabolic process	14	2	0.47	0.50961
GO:0006241	CTP biosynthetic process	14	2	0.47	0.50961
GO:0006873	cellular ion homeostasis	118	3	3.94	0.50972
GO:0042794	rRNA transcription from plastid promoter	1	0	0.03	0.50986
GO:0009814	defense response, incompatible interaction	22	1	0.73	0.51009
GO:0032543	mitochondrial translation	21	0	0.7	0.51042
GO:0042538	hyperosmotic salinity response	8	0	0.27	0.51092
GO:0009793	embryo development ending in seed dormancy	88	3	2.94	0.5111
GO:0006725	cellular aromatic compound metabolic process	3057	73	102.08	0.51112
GO:0048654	anther morphogenesis	2	0	0.07	0.51133
GO:0048655	anther wall tapetum morphogenesis	2	0	0.07	0.51133
GO:0048656	anther wall tapetum formation	2	0	0.07	0.51133
GO:0048657	anther wall tapetum cell differentiation	2	0	0.07	0.51133
GO:0048455	stamen formation	2	0	0.07	0.51133
GO:0048448	stamen morphogenesis	2	0	0.07	0.51133
GO:0032885	regulation of polysaccharide biosynthetic process	2	0	0.07	0.51184
GO:0010962	regulation of glucan biosynthetic process	2	0	0.07	0.51184
GO:0090056	regulation of chlorophyll metabolic process	2	0	0.07	0.51184
GO:0044271	cellular nitrogen compound biosynthetic process	1341	39	44.78	0.51193
GO:0000724	double-strand break repair via homologous recombination	30	0	1	0.51203
GO:0000725	recombinational repair	30	0	1	0.51203
GO:0001666	response to hypoxia	11	0	0.37	0.51267
GO:0009647	skotomorphogenesis	2	0	0.07	0.51285
GO:0042775	mitochondrial ATP synthesis coupled electron transport	18	0	0.6	0.51314
GO:0006303	double-strand break repair via nonhomologous end joining	8	0	0.27	0.5134
GO:0000726	non-recombinational repair	8	0	0.27	0.5134
GO:0050801	ion homeostasis	144	7	4.81	0.51403
GO:0007051	spindle organization	14	0	0.47	0.51456
GO:0051186	cofactor metabolic process	206	3	6.88	0.51458
GO:0009310	amine catabolic process	4	0	0.13	0.51473
GO:0042402	cellular biogenic amine catabolic process	4	0	0.13	0.51473
GO:0072593	reactive oxygen species metabolic process	93	6	3.11	0.51682
GO:0046073	dTMP metabolic process	3	0	0.1	0.51682
GO:0006231	dTMP biosynthetic process	3	0	0.1	0.51682
GO:0005992	trehalose biosynthetic process	14	1	0.47	0.51788
GO:0042274	ribosomal small subunit biogenesis	58	1	1.94	0.51828
GO:0006814	sodium ion transport	17	1	0.57	0.51882
GO:0019805	quinolinate biosynthetic process	1	0	0.03	0.51913
GO:0051176	positive regulation of sulfur metabolic process	1	0	0.03	0.51913
GO:2001057	reactive nitrogen species metabolic process	2	0	0.07	0.51948
GO:0042157	lipoprotein metabolic process	31	1	1.04	0.51956
GO:0006421	asparaginyl-tRNA aminoacylation	3	0	0.1	0.51964
GO:1901475	pyruvate transmembrane transport	1	0	0.03	0.5204
GO:0006849	plasma membrane pyruvate transport	1	0	0.03	0.5204
GO:0000154	rRNA modification	35	1	1.17	0.52088
GO:0044763	single-organism cellular process	4601	187	153.63	0.52107
GO:0070301	cellular response to hydrogen peroxide	67	5	2.24	0.52109
GO:0051239	regulation of multicellular organismal process	107	5	3.57	0.52128
GO:0051275	beta-glucan catabolic process	16	1	0.53	0.52326
GO:0009168	purine ribonucleoside monophosphate biosynthetic process	121	3	4.04	0.52387
GO:0009127	purine nucleoside monophosphate biosynthetic process	121	3	4.04	0.52387
GO:0042357	thiamine diphosphate metabolic process	2	0	0.07	0.52402
GO:0009229	thiamine diphosphate biosynthetic process	2	0	0.07	0.52402
GO:0044092	negative regulation of molecular function	50	1	1.67	0.5241
GO:0016073	snRNA metabolic process	8	0	0.27	0.52437
GO:0071025	RNA surveillance	8	0	0.27	0.52437
GO:1902533	positive regulation of intracellular signal transduction	4	1	0.13	0.5252
GO:0036228	protein localization to nuclear inner membrane	2	0	0.07	0.52542
GO:0006436	tryptophanyl-tRNA aminoacylation	2	0	0.07	0.52658
GO:0042372	phylloquinone biosynthetic process	1	0	0.03	0.52736
GO:0042374	phylloquinone metabolic process	1	0	0.03	0.52736
GO:0033238	regulation of cellular amine metabolic process	6	0	0.2	0.52772
GO:0006521	regulation of cellular amino acid metabolic process	6	0	0.2	0.52772
GO:0006972	hyperosmotic response	10	0	0.33	0.52777
GO:0006418	tRNA aminoacylation for protein translation	72	2	2.4	0.52832
GO:0034067	protein localization to Golgi apparatus	3	0	0.1	0.52919
GO:0051596	methylglyoxal catabolic process	8	0	0.27	0.53081
GO:0009438	methylglyoxal metabolic process	8	0	0.27	0.53081
GO:0044106	cellular amine metabolic process	60	2	2	0.53087
GO:0015798	myo-inositol transport	3	1	0.1	0.53102
GO:0009110	vitamin biosynthetic process	33	0	1.1	0.53256
GO:0031503	protein complex localization	7	0	0.23	0.53296
GO:0034629	cellular protein complex localization	7	0	0.23	0.53296
GO:0051055	negative regulation of lipid biosynthetic process	5	0	0.17	0.53311
GO:0045833	negative regulation of lipid metabolic process	5	0	0.17	0.53311
GO:0017006	protein-tetrapyrrole linkage	7	0	0.23	0.5332
GO:0043486	histone exchange	1	0	0.03	0.53362
GO:0031063	regulation of histone deacetylation	1	0	0.03	0.53362
GO:0090311	regulation of protein deacetylation	1	0	0.03	0.53362
GO:0070482	response to oxygen levels	12	0	0.4	0.53446
GO:0036293	response to decreased oxygen levels	12	0	0.4	0.53446
GO:0072350	tricarboxylic acid metabolic process	11	0	0.37	0.53489
GO:0043410	positive regulation of MAPK cascade	3	1	0.1	0.53543
GO:0043406	positive regulation of MAP kinase activity	3	1	0.1	0.53543
GO:0000187	activation of MAPK activity	3	1	0.1	0.53543
GO:0009813	flavonoid biosynthetic process	75	4	2.5	0.53608
GO:0010212	response to ionizing radiation	14	0	0.47	0.53616
GO:0035265	organ growth	6	1	0.2	0.53627
GO:0043484	regulation of RNA splicing	8	0	0.27	0.53688
GO:0034968	histone lysine methylation	11	0	0.37	0.53717
GO:0045004	DNA replication proofreading	2	0	0.07	0.53735
GO:0006297	nucleotide-excision repair, DNA gap filling	2	0	0.07	0.53735
GO:0006287	base-excision repair, gap-filling	2	0	0.07	0.53735
GO:0030865	cortical cytoskeleton organization	6	0	0.2	0.53761
GO:0009152	purine ribonucleotide biosynthetic process	134	3	4.47	0.53768
GO:0042762	regulation of sulfur metabolic process	5	0	0.17	0.53811
GO:0010052	guard cell differentiation	2	0	0.07	0.53825
GO:0060284	regulation of cell development	2	0	0.07	0.53825
GO:0006743	ubiquinone metabolic process	12	0	0.4	0.53895
GO:0006744	ubiquinone biosynthetic process	12	0	0.4	0.53895
GO:0015809	arginine transport	2	0	0.07	0.53909
GO:0043092	L-amino acid import	2	0	0.07	0.53909
GO:1901991	negative regulation of mitotic cell cycle phase transition	9	0	0.3	0.53914
GO:0007093	mitotic cell cycle checkpoint	9	0	0.3	0.53914
GO:1901988	negative regulation of cell cycle phase transition	9	0	0.3	0.53914
GO:0009737	response to abscisic acid	111	9	3.71	0.53989
GO:0022611	dormancy process	3	0	0.1	0.54036
GO:0010162	seed dormancy process	3	0	0.1	0.54036
GO:0044764	multi-organism cellular process	12	0	0.4	0.54063
GO:0043090	amino acid import	6	1	0.2	0.54065
GO:0006818	hydrogen transport	198	8	6.61	0.54102
GO:0015992	proton transport	198	8	6.61	0.54102
GO:0060776	simple leaf morphogenesis	4	0	0.13	0.54109
GO:0031221	arabinan metabolic process	5	0	0.17	0.54149
GO:0031222	arabinan catabolic process	5	0	0.17	0.54149
GO:0043628	ncRNA 3'-end processing	16	0	0.53	0.54181
GO:0009163	nucleoside biosynthetic process	169	4	5.64	0.54274
GO:0042989	sequestering of actin monomers	6	0	0.2	0.54318
GO:0009162	deoxyribonucleoside monophosphate metabolic process	8	0	0.27	0.5446
GO:0009157	deoxyribonucleoside monophosphate biosynthetic process	8	0	0.27	0.5446
GO:0015785	UDP-galactose transport	1	0	0.03	0.54544
GO:0090481	pyrimidine nucleotide-sugar transmembrane transport	1	0	0.03	0.54544
GO:0072334	UDP-galactose transmembrane transport	1	0	0.03	0.54544
GO:0008544	epidermis development	40	1	1.34	0.54574
GO:0043588	skin development	40	1	1.34	0.54574
GO:0060429	epithelium development	40	1	1.34	0.54574
GO:1902600	hydrogen ion transmembrane transport	163	5	5.44	0.54624
GO:0045827	negative regulation of isoprenoid metabolic process	3	0	0.1	0.54625
GO:0045828	positive regulation of isoprenoid metabolic process	3	0	0.1	0.54625
GO:0010371	regulation of gibberellin biosynthetic process	3	0	0.1	0.54625
GO:0010373	negative regulation of gibberellin biosynthetic process	3	0	0.1	0.54625
GO:0010116	positive regulation of abscisic acid biosynthetic process	3	0	0.1	0.54625
GO:0042455	ribonucleoside biosynthetic process	165	4	5.51	0.54685
GO:0000184	nuclear-transcribed mRNA catabolic process, nonsense-mediated decay	8	0	0.27	0.54796
GO:2000038	regulation of stomatal complex development	2	0	0.07	0.54856
GO:2000123	positive regulation of stomatal complex development	2	0	0.07	0.54856
GO:0045682	regulation of epidermis development	2	0	0.07	0.54856
GO:0045684	positive regulation of epidermis development	2	0	0.07	0.54856
GO:0009639	response to red or far red light	51	1	1.7	0.5488
GO:0009744	response to sucrose	7	0	0.23	0.54885
GO:0034285	response to disaccharide	7	0	0.23	0.54885
GO:0048609	multicellular organismal reproductive process	16	0	0.53	0.54894
GO:0046185	aldehyde catabolic process	12	0	0.4	0.54961
GO:0050983	obsolete deoxyhypusine biosynthetic process from spermidine	1	0	0.03	0.5501
GO:0046203	spermidine catabolic process	1	0	0.03	0.5501
GO:0006598	polyamine catabolic process	1	0	0.03	0.5501
GO:0002130	wobble position ribose methylation	1	0	0.03	0.55028
GO:0043044	ATP-dependent chromatin remodeling	6	0	0.2	0.55041
GO:1901401	regulation of tetrapyrrole metabolic process	3	0	0.1	0.55068
GO:0048528	post-embryonic root development	30	0	1	0.55113
GO:0046156	siroheme metabolic process	1	0	0.03	0.55119
GO:0019354	siroheme biosynthetic process	1	0	0.03	0.55119
GO:0031667	response to nutrient levels	41	0	1.37	0.55195
GO:0006096	glycolytic process	76	6	2.54	0.55205
GO:0015672	monovalent inorganic cation transport	294	17	9.82	0.55228
GO:0000027	ribosomal large subunit assembly	28	0	0.93	0.55266
GO:0000394	RNA splicing, via endonucleolytic cleavage and ligation	11	0	0.37	0.55267
GO:0019438	aromatic compound biosynthetic process	1401	52	46.78	0.55322
GO:0015985	energy coupled proton transport, down electrochemical gradient	69	2	2.3	0.55372
GO:0015986	ATP synthesis coupled proton transport	69	2	2.3	0.55372
GO:0033206	meiotic cytokinesis	2	0	0.07	0.55411
GO:0007112	male meiosis cytokinesis	2	0	0.07	0.55411
GO:0009145	purine nucleoside triphosphate biosynthetic process	104	2	3.47	0.55445
GO:0009206	purine ribonucleoside triphosphate biosynthetic process	104	2	3.47	0.55445
GO:0046390	ribose phosphate biosynthetic process	160	5	5.34	0.55448
GO:0009260	ribonucleotide biosynthetic process	160	5	5.34	0.55448
GO:0006188	IMP biosynthetic process	14	1	0.47	0.55508
GO:0009736	cytokinin-activated signaling pathway	20	0	0.67	0.55514
GO:0071368	cellular response to cytokinin stimulus	20	0	0.67	0.55514
GO:0005984	disaccharide metabolic process	37	2	1.24	0.55544
GO:0010037	response to carbon dioxide	3	1	0.1	0.55622
GO:0006546	glycine catabolic process	10	0	0.33	0.55669
GO:0022622	root system development	91	1	3.04	0.55709
GO:0048364	root development	91	1	3.04	0.55709
GO:0016051	carbohydrate biosynthetic process	144	3	4.81	0.55726
GO:0009220	pyrimidine ribonucleotide biosynthetic process	29	2	0.97	0.55761
GO:0009218	pyrimidine ribonucleotide metabolic process	29	2	0.97	0.55761
GO:1903289	obsolete regulation of ATP catabolic process	4	0	0.13	0.55802
GO:0043462	regulation of ATPase activity	4	0	0.13	0.55802
GO:0006200	obsolete ATP catabolic process	4	0	0.13	0.55802
GO:0009169	purine ribonucleoside monophosphate catabolic process	4	0	0.13	0.55802
GO:0009158	ribonucleoside monophosphate catabolic process	4	0	0.13	0.55802
GO:0009125	nucleoside monophosphate catabolic process	4	0	0.13	0.55802
GO:0009128	purine nucleoside monophosphate catabolic process	4	0	0.13	0.55802
GO:0019287	isopentenyl diphosphate biosynthetic process, mevalonate pathway	1	0	0.03	0.55823
GO:0000272	polysaccharide catabolic process	95	4	3.17	0.55876
GO:0051382	kinetochore assembly	1	0	0.03	0.55887
GO:0051383	kinetochore organization	1	0	0.03	0.55887
GO:0009826	unidimensional cell growth	34	0	1.14	0.55948
GO:0009269	response to desiccation	8	1	0.27	0.55956
GO:0006273	lagging strand elongation	7	0	0.23	0.55974
GO:0042542	response to hydrogen peroxide	71	5	2.37	0.56046
GO:0008202	steroid metabolic process	50	2	1.67	0.56077
GO:0035825	reciprocal DNA recombination	17	0	0.57	0.56078
GO:0000278	mitotic cell cycle	77	0	2.57	0.56174
GO:0071139	resolution of recombination intermediates	1	0	0.03	0.5618
GO:0006346	methylation-dependent chromatin silencing	5	0	0.17	0.56216
GO:0010647	positive regulation of cell communication	11	1	0.37	0.56233
GO:0044270	cellular nitrogen compound catabolic process	137	4	4.57	0.56239
GO:0006123	mitochondrial electron transport, cytochrome c to oxygen	4	0	0.13	0.56282
GO:0009071	serine family amino acid catabolic process	12	0	0.4	0.564
GO:0006429	leucyl-tRNA aminoacylation	1	0	0.03	0.56446
GO:1901659	glycosyl compound biosynthetic process	170	4	5.68	0.56495
GO:0005985	sucrose metabolic process	15	1	0.5	0.56513
GO:0000122	negative regulation of transcription from RNA polymerase II promoter	3	0	0.1	0.5652
GO:0098581	detection of external biotic stimulus	1	0	0.03	0.56565
GO:0002220	innate immune response activating cell surface receptor signaling pathway	1	0	0.03	0.56565
GO:0002768	immune response-regulating cell surface receptor signaling pathway	1	0	0.03	0.56565
GO:0002752	cell surface pattern recognition receptor signaling pathway	1	0	0.03	0.56565
GO:0009595	detection of biotic stimulus	1	0	0.03	0.56565
GO:0002429	immune response-activating cell surface receptor signaling pathway	1	0	0.03	0.56565
GO:0032490	detection of molecule of bacterial origin	1	0	0.03	0.56565
GO:0032491	detection of molecule of fungal origin	1	0	0.03	0.56565
GO:0032494	response to peptidoglycan	1	0	0.03	0.56565
GO:0032499	detection of peptidoglycan	1	0	0.03	0.56565
GO:0019243	methylglyoxal catabolic process to D-lactate via S-lactoyl-glutathione	6	0	0.2	0.56583
GO:0006089	lactate metabolic process	6	0	0.2	0.56583
GO:0047484	regulation of response to osmotic stress	4	1	0.13	0.56622
GO:0031125	rRNA 3'-end processing	7	0	0.23	0.56847
GO:0009063	cellular amino acid catabolic process	47	3	1.57	0.56887
GO:0000096	sulfur amino acid metabolic process	51	2	1.7	0.56921
GO:0046874	quinolinate metabolic process	2	0	0.07	0.56939
GO:0046049	UMP metabolic process	14	0	0.47	0.57072
GO:0006222	UMP biosynthetic process	14	0	0.47	0.57072
GO:0009173	pyrimidine ribonucleoside monophosphate metabolic process	14	0	0.47	0.57072
GO:0009174	pyrimidine ribonucleoside monophosphate biosynthetic process	14	0	0.47	0.57072
GO:0097305	response to alcohol	139	10	4.64	0.57113
GO:0032269	negative regulation of cellular protein metabolic process	29	0	0.97	0.57147
GO:0051248	negative regulation of protein metabolic process	29	0	0.97	0.57147
GO:0002097	tRNA wobble base modification	5	0	0.17	0.5718
GO:0002098	tRNA wobble uridine modification	5	0	0.17	0.5718
GO:0009650	UV protection	2	0	0.07	0.57407
GO:0006290	pyrimidine dimer repair	2	0	0.07	0.57407
GO:0000719	photoreactive repair	2	0	0.07	0.57407
GO:0006434	seryl-tRNA aminoacylation	2	0	0.07	0.5753
GO:0046777	protein autophosphorylation	53	5	1.77	0.57571
GO:0030026	cellular manganese ion homeostasis	9	0	0.3	0.57573
GO:0006880	intracellular sequestering of iron ion	9	0	0.3	0.57573
GO:0006828	manganese ion transport	9	0	0.3	0.57573
GO:0071421	manganese ion transmembrane transport	9	0	0.3	0.57573
GO:0071281	cellular response to iron ion	9	0	0.3	0.57573
GO:0097577	sequestering of iron ion	9	0	0.3	0.57573
GO:0055071	manganese ion homeostasis	9	0	0.3	0.57573
GO:0032973	amino acid export	3	1	0.1	0.5758
GO:0080144	amino acid homeostasis	3	1	0.1	0.5758
GO:0016071	mRNA metabolic process	215	1	7.18	0.57585
GO:0009594	detection of nutrient	2	0	0.07	0.57673
GO:0045901	positive regulation of translational elongation	3	0	0.1	0.57702
GO:0045905	positive regulation of translational termination	3	0	0.1	0.57702
GO:0043243	positive regulation of protein complex disassembly	3	0	0.1	0.57702
GO:0006452	translational frameshifting	3	0	0.1	0.57702
GO:0006449	regulation of translational termination	3	0	0.1	0.57702
GO:0032776	DNA methylation on cytosine	7	0	0.23	0.57787
GO:0090116	C-5 methylation of cytosine	7	0	0.23	0.57787
GO:0048584	positive regulation of response to stimulus	23	3	0.77	0.57825
GO:0046903	secretion	57	1	1.9	0.57866
GO:0030641	regulation of cellular pH	37	1	1.24	0.57904
GO:0051453	regulation of intracellular pH	37	1	1.24	0.57904
GO:0048646	anatomical structure formation involved in morphogenesis	50	10	1.67	0.57948
GO:0000470	maturation of LSU-rRNA	38	1	1.27	0.58035
GO:0045927	positive regulation of growth	3	1	0.1	0.58057
GO:0042594	response to starvation	34	0	1.14	0.58058
GO:0042752	regulation of circadian rhythm	7	0	0.23	0.58089
GO:0006754	ATP biosynthetic process	100	2	3.34	0.58118
GO:0019748	secondary metabolic process	199	12	6.64	0.58185
GO:0010959	regulation of metal ion transport	2	0	0.07	0.58206
GO:0002376	immune system process	58	2	1.94	0.58214
GO:0048468	cell development	31	0	1.04	0.58218
GO:0034654	nucleobase-containing compound biosynthetic process	1188	36	39.67	0.58308
GO:0051601	exocyst localization	6	0	0.2	0.58311
GO:0006338	chromatin remodeling	22	0	0.73	0.58324
GO:0048437	floral organ development	36	3	1.2	0.58343
GO:0072600	establishment of protein localization to Golgi	1	0	0.03	0.58355
GO:0000042	protein targeting to Golgi	1	0	0.03	0.58355
GO:0006895	Golgi to endosome transport	1	0	0.03	0.58355
GO:0046134	pyrimidine nucleoside biosynthetic process	30	2	1	0.58451
GO:0009156	ribonucleoside monophosphate biosynthetic process	136	3	4.54	0.58542
GO:0000302	response to reactive oxygen species	103	6	3.44	0.58546
GO:0009664	plant-type cell wall organization	76	4	2.54	0.58562
GO:0048480	stigma development	1	0	0.03	0.58576
GO:0043269	regulation of ion transport	12	0	0.4	0.58651
GO:0007154	cell communication	702	23	23.44	0.58684
GO:0032940	secretion by cell	56	1	1.87	0.58711
GO:0007231	osmosensory signaling pathway	2	0	0.07	0.58739
GO:0006561	proline biosynthetic process	12	1	0.4	0.5876
GO:0042177	negative regulation of protein catabolic process	1	0	0.03	0.58796
GO:0010955	negative regulation of protein processing	1	0	0.03	0.58796
GO:1903069	regulation of ER-associated ubiquitin-dependent protein catabolic process	1	0	0.03	0.58796
GO:0015789	UDP-N-acetylgalactosamine transport	1	0	0.03	0.58796
GO:1903051	negative regulation of proteolysis involved in cellular protein catabolic process	1	0	0.03	0.58796
GO:1903070	negative regulation of ER-associated ubiquitin-dependent protein catabolic process	1	0	0.03	0.58796
GO:0045861	negative regulation of proteolysis	1	0	0.03	0.58796
GO:1901799	negative regulation of proteasomal protein catabolic process	1	0	0.03	0.58796
GO:1903318	negative regulation of protein maturation	1	0	0.03	0.58796
GO:1902182	shoot apical meristem development	1	0	0.03	0.58796
GO:1902183	regulation of shoot apical meristem development	1	0	0.03	0.58796
GO:0032435	negative regulation of proteasomal ubiquitin-dependent protein catabolic process	1	0	0.03	0.58796
GO:0042221	response to chemical	768	36	25.64	0.58814
GO:1990267	response to transition metal nanoparticle	8	0	0.27	0.589
GO:0000447	endonucleolytic cleavage in ITS1 to separate SSU-rRNA from 5.8S rRNA and LSU-rRNA from tricistronic rRNA transcript (SSU-rRNA, 5.8S rRNA, LSU-rRNA)	5	0	0.17	0.58963
GO:0006212	uracil catabolic process	1	0	0.03	0.58971
GO:0006208	pyrimidine nucleobase catabolic process	1	0	0.03	0.58971
GO:0015720	allantoin transport	1	0	0.03	0.59035
GO:0006775	fat-soluble vitamin metabolic process	3	0	0.1	0.5905
GO:0010189	vitamin E biosynthetic process	3	0	0.1	0.5905
GO:0042360	vitamin E metabolic process	3	0	0.1	0.5905
GO:0042362	fat-soluble vitamin biosynthetic process	3	0	0.1	0.5905
GO:0001944	vasculature development	2	0	0.07	0.59064
GO:0072358	cardiovascular system development	2	0	0.07	0.59064
GO:0072359	circulatory system development	2	0	0.07	0.59064
GO:0030155	regulation of cell adhesion	2	0	0.07	0.59064
GO:0010148	transpiration	2	0	0.07	0.59064
GO:0051302	regulation of cell division	25	0	0.83	0.59082
GO:0090351	seedling development	32	3	1.07	0.59109
GO:0007126	meiotic cell cycle	30	0	1	0.5912
GO:0015961	diadenosine polyphosphate catabolic process	1	0	0.03	0.59137
GO:0015965	diadenosine tetraphosphate metabolic process	1	0	0.03	0.59137
GO:0015967	diadenosine tetraphosphate catabolic process	1	0	0.03	0.59137
GO:0015959	diadenosine polyphosphate metabolic process	1	0	0.03	0.59137
GO:0048509	regulation of meristem development	21	1	0.7	0.59156
GO:0010035	response to inorganic substance	206	12	6.88	0.59182
GO:0019523	L-idonate metabolic process	1	0	0.03	0.5921
GO:0046183	L-idonate catabolic process	1	0	0.03	0.5921
GO:0006732	coenzyme metabolic process	154	3	5.14	0.59217
GO:0010582	floral meristem determinacy	1	0	0.03	0.59229
GO:0010022	meristem determinacy	1	0	0.03	0.59229
GO:0010254	nectary development	1	0	0.03	0.59229
GO:0006102	isocitrate metabolic process	7	0	0.23	0.59344
GO:0010311	lateral root formation	11	0	0.37	0.59355
GO:1901135	carbohydrate derivative metabolic process	510	16	17.03	0.59373
GO:0010193	response to ozone	3	0	0.1	0.5939
GO:0060627	regulation of vesicle-mediated transport	20	0	0.67	0.59403
GO:0016265	obsolete death	34	1	1.14	0.5941
GO:0008219	cell death	34	1	1.14	0.5941
GO:0016126	sterol biosynthetic process	7	0	0.23	0.59497
GO:0001708	cell fate specification	9	1	0.3	0.5952
[truncated: 1,913 more rows]

## Sheet: Cellular Component (CC)
Table S3. TopGO enrichment result file of differentially expressed genes (CC)
GO.ID	Term	Annotated	Significant	Expected	KS
GO:0016021	integral component of membrane	3641	131	111.97	0.00026
GO:0005788	endoplasmic reticulum lumen	12	4	0.37	0.00204
GO:0005929	cilium	11	0	0.34	0.00889
GO:0031226	intrinsic component of plasma membrane	246	19	7.57	0.01859
GO:0031977	thylakoid lumen	28	1	0.86	0.02417
GO:0098573	intrinsic component of mitochondrial membrane	21	1	0.65	0.02734
GO:0032592	integral component of mitochondrial membrane	21	1	0.65	0.02734
GO:0071944	cell periphery	1295	69	39.83	0.02752
GO:0005677	chromatin silencing complex	5	0	0.15	0.02843
GO:0031306	intrinsic component of mitochondrial outer membrane	8	1	0.25	0.03506
GO:0031307	integral component of mitochondrial outer membrane	8	1	0.25	0.03506
GO:0000307	cyclin-dependent protein kinase holoenzyme complex	10	0	0.31	0.04181
GO:0009505	plant-type cell wall	93	7	2.86	0.04711
GO:0046658	anchored component of plasma membrane	80	5	2.46	0.05821
GO:0016459	myosin complex	18	2	0.55	0.06469
GO:0035770	ribonucleoprotein granule	36	0	1.11	0.06739
GO:0036464	cytoplasmic ribonucleoprotein granule	36	0	1.11	0.06739
GO:0031501	mannosyltransferase complex	5	0	0.15	0.07229
GO:0000932	P-body	29	0	0.89	0.078
GO:0090406	pollen tube	6	0	0.18	0.08059
GO:0010598	NAD(P)H dehydrogenase complex (plastoquinone)	3	2	0.09	0.08211
GO:0070545	PeBoW complex	3	0	0.09	0.08241
GO:0070985	TFIIK complex	2	0	0.06	0.08348
GO:0005887	integral component of plasma membrane	168	14	5.17	0.08601
GO:0005618	cell wall	265	15	8.15	0.08635
GO:0030312	external encapsulating structure	269	15	8.27	0.08637
GO:0031510	SUMO activating enzyme complex	2	0	0.06	0.09967
GO:0005886	plasma membrane	988	55	30.38	0.10046
GO:0045275	respiratory chain complex III	9	0	0.28	0.10159
GO:0031225	anchored component of membrane	90	5	2.77	0.10265
GO:0031082	BLOC complex	2	0	0.06	0.10435
GO:0031083	BLOC-1 complex	2	0	0.06	0.10435
GO:0097218	sieve plate	2	1	0.06	0.10787
GO:1990391	DNA repair complex	12	0	0.37	0.10863
GO:0000784	nuclear chromosome, telomeric region	8	0	0.25	0.10927
GO:0009524	phragmoplast	26	2	0.8	0.1147
GO:0030054	cell junction	225	11	6.92	0.11566
GO:0005773	vacuole	305	9	9.38	0.11732
GO:0000275	mitochondrial proton-transporting ATP synthase complex, catalytic core F(1)	6	1	0.18	0.11834
GO:0032300	mismatch repair complex	7	0	0.22	0.1223
GO:0005751	mitochondrial respiratory chain complex IV	3	0	0.09	0.12546
GO:0045277	respiratory chain complex IV	3	0	0.09	0.12546
GO:0005911	cell-cell junction	224	11	6.89	0.12575
GO:0055044	symplast	224	11	6.89	0.12575
GO:0009506	plasmodesma	224	11	6.89	0.12575
GO:0031304	intrinsic component of mitochondrial inner membrane	13	0	0.4	0.12712
GO:0031305	integral component of mitochondrial inner membrane	13	0	0.4	0.12712
GO:1902911	protein kinase complex	19	0	0.58	0.13393
GO:0032299	ribonuclease H2 complex	2	0	0.06	0.13438
GO:0044459	plasma membrane part	290	20	8.92	0.13711
GO:0016363	nuclear matrix	2	1	0.06	0.15435
GO:0031314	extrinsic component of mitochondrial inner membrane	3	0	0.09	0.16176
GO:0032588	trans-Golgi network membrane	3	0	0.09	0.16237
GO:0009331	glycerol-3-phosphate dehydrogenase complex	8	0	0.25	0.16363
GO:0030687	preribosome, large subunit precursor	25	1	0.77	0.16378
GO:0042807	central vacuole	6	0	0.18	0.16539
GO:0070069	cytochrome complex	14	0	0.43	0.16595
GO:0031352	intrinsic component of plastid inner membrane	1	0	0.03	0.16841
GO:0031353	integral component of plastid inner membrane	1	0	0.03	0.16841
GO:0031356	intrinsic component of chloroplast inner membrane	1	0	0.03	0.16841
GO:0031357	integral component of chloroplast inner membrane	1	0	0.03	0.16841
GO:0000325	plant-type vacuole	46	0	1.41	0.17165
GO:0009705	plant-type vacuole membrane	34	0	1.05	0.17254
GO:0032302	MutSbeta complex	1	0	0.03	0.17531
GO:0045298	tubulin complex	1	0	0.03	0.17686
GO:0031429	box H/ACA snoRNP complex	4	0	0.12	0.17702
GO:0072588	box H/ACA RNP complex	4	0	0.12	0.17702
GO:0033597	mitotic checkpoint complex	3	0	0.09	0.17749
GO:1990298	bub1-bub3 complex	3	0	0.09	0.17749
GO:0043073	germ cell nucleus	1	0	0.03	0.17999
GO:0009538	photosystem I reaction center	8	0	0.25	0.18228
GO:0070971	endoplasmic reticulum exit site	1	0	0.03	0.18649
GO:0031390	Ctf18 RFC-like complex	1	0	0.03	0.18761
GO:0071541	eukaryotic translation initiation factor 3 complex, eIF3m	1	0	0.03	0.20004
GO:0030990	intraciliary transport particle	1	0	0.03	0.20021
GO:0030991	intraciliary transport particle A	1	0	0.03	0.20021
GO:0031332	RNAi effector complex	6	0	0.18	0.2027
GO:0016442	RISC complex	6	0	0.18	0.2027
GO:0000214	tRNA-intron endonuclease complex	2	0	0.06	0.2064
GO:1902555	endoribonuclease complex	2	0	0.06	0.2064
GO:0033185	dolichol-phosphate-mannose synthase complex	3	0	0.09	0.20681
GO:0035032	phosphatidylinositol 3-kinase complex, class III	1	0	0.03	0.21418
GO:0022625	cytosolic large ribosomal subunit	125	1	3.84	0.21525
GO:0005971	ribonucleoside-diphosphate reductase complex	4	0	0.12	0.21669
GO:0030904	retromer complex	6	0	0.18	0.21875
GO:0005741	mitochondrial outer membrane	20	1	0.62	0.21964
GO:1990351	transporter complex	16	0	0.49	0.21991
GO:0009706	chloroplast inner membrane	27	2	0.83	0.22065
GO:0000781	chromosome, telomeric region	9	0	0.28	0.22087
GO:0033186	CAF-1 complex	1	0	0.03	0.22257
GO:0043596	nuclear replication fork	14	0	0.43	0.232
GO:0005774	vacuolar membrane	153	4	4.71	0.23231
GO:0044437	vacuolar part	153	4	4.71	0.23231
GO:0019822	P4 peroxisome	1	0	0.03	0.23586
GO:0031417	NatC complex	1	0	0.03	0.24007
GO:0009514	glyoxysome	3	0	0.09	0.24543
GO:0016282	eukaryotic 43S preinitiation complex	19	0	0.58	0.24551
GO:0031502	dolichyl-phosphate-mannose-protein mannosyltransferase complex	1	0	0.03	0.24809
GO:0034399	nuclear periphery	9	1	0.28	0.24854
GO:0031371	ubiquitin conjugating enzyme complex	4	0	0.12	0.25191
GO:0031372	UBC13-MMS2 complex	4	0	0.12	0.25191
GO:1990204	oxidoreductase complex	83	2	2.55	0.25228
GO:0009547	plastid ribosome	5	0	0.15	0.25321
GO:0005657	replication fork	21	0	0.65	0.25323
GO:0044462	external encapsulating structure part	7	1	0.22	0.25604
GO:0033179	proton-transporting V-type ATPase, V0 domain	16	0	0.49	0.2611
GO:0008180	COP9 signalosome	8	1	0.25	0.26411
GO:0032580	Golgi cisterna membrane	2	0	0.06	0.2666
GO:0071006	U2-type catalytic step 1 spliceosome	2	0	0.06	0.26881
GO:0005675	holo TFIIH complex	9	0	0.28	0.26902
GO:0032806	carboxy-terminal domain protein kinase complex	9	0	0.28	0.26902
GO:0044613	nuclear pore central transport channel	1	0	0.03	0.2729
GO:0048492	ribulose bisphosphate carboxylase complex	1	0	0.03	0.27304
GO:0009573	chloroplast ribulose bisphosphate carboxylase complex	1	0	0.03	0.27304
GO:0005839	proteasome core complex	25	0	0.77	0.2765
GO:0005853	eukaryotic translation elongation factor 1 complex	3	0	0.09	0.27747
GO:0010494	cytoplasmic stress granule	7	0	0.22	0.28248
GO:0000775	chromosome, centromeric region	12	0	0.37	0.2833
GO:0070993	translation preinitiation complex	26	1	0.8	0.28337
GO:0071020	post-spliceosomal complex	3	0	0.09	0.28767
GO:0009528	plastid inner membrane	28	2	0.86	0.28963
GO:0030894	replisome	9	0	0.28	0.29579
GO:0043601	nuclear replisome	9	0	0.28	0.29579
GO:1902495	transmembrane transporter complex	15	0	0.46	0.29807
GO:0030014	CCR4-NOT complex	20	0	0.62	0.29849
GO:0009509	chromoplast	9	0	0.28	0.30616
GO:0005690	U4atac snRNP	3	0	0.09	0.30713
GO:0000795	synaptonemal complex	3	0	0.09	0.31007
GO:0005852	eukaryotic translation initiation factor 3 complex	20	0	0.62	0.31012
GO:0033290	eukaryotic 48S preinitiation complex	20	0	0.62	0.31012
GO:0031300	intrinsic component of organelle membrane	53	1	1.63	0.31319
GO:0031301	integral component of organelle membrane	53	1	1.63	0.31319
GO:0000311	plastid large ribosomal subunit	3	0	0.09	0.31754
GO:0097249	mitochondrial respiratory chain supercomplex	3	0	0.09	0.31808
GO:0031224	intrinsic component of membrane	3714	134	114.22	0.32244
GO:0005667	transcription factor complex	41	2	1.26	0.32389
GO:0015934	large ribosomal subunit	182	1	5.6	0.32971
GO:0045261	proton-transporting ATP synthase complex, catalytic core F(1)	32	1	0.98	0.3304
GO:0005960	glycine cleavage complex	6	0	0.18	0.3334
GO:0005684	U2-type spliceosomal complex	28	1	0.86	0.33377
GO:0098687	chromosomal region	10	0	0.31	0.33423
GO:0044421	extracellular region part	35	0	1.08	0.33505
GO:0005740	mitochondrial envelope	188	5	5.78	0.34115
GO:0005615	extracellular space	34	0	1.05	0.34571
GO:0005791	rough endoplasmic reticulum	4	0	0.12	0.34615
GO:0030867	rough endoplasmic reticulum membrane	4	0	0.12	0.34615
GO:0048500	signal recognition particle	12	0	0.37	0.34707
GO:0005849	mRNA cleavage factor complex	8	0	0.25	0.34863
GO:0015629	actin cytoskeleton	47	3	1.45	0.35033
GO:0005669	transcription factor TFIID complex	8	1	0.25	0.35194
GO:0043625	delta DNA polymerase complex	2	0	0.06	0.35574
GO:0030870	Mre11 complex	2	0	0.06	0.35763
GO:0044426	cell wall part	3	1	0.09	0.35976
GO:0033061	DNA recombinase mediator complex	2	0	0.06	0.36107
GO:0033063	Rad51B-Rad51C-Rad51D-XRCC2 complex	2	0	0.06	0.36107
GO:0071011	precatalytic spliceosome	39	0	1.2	0.36233
GO:0045177	apical part of cell	2	0	0.06	0.3625
GO:0016324	apical plasma membrane	2	0	0.06	0.3625
GO:0098590	plasma membrane region	2	0	0.06	0.3625
GO:0005662	DNA replication factor A complex	3	0	0.09	0.36545
GO:0070847	core mediator complex	4	0	0.12	0.36576
GO:0031436	BRCA1-BARD1 complex	1	0	0.03	0.3667
GO:0070531	BRCA1-A complex	1	0	0.03	0.3667
GO:0043564	Ku70:Ku80 complex	2	0	0.06	0.37246
GO:0009654	photosystem II oxygen evolving complex	22	1	0.68	0.37251
GO:0000811	GINS complex	4	0	0.12	0.37316
GO:0000776	kinetochore	8	0	0.25	0.38234
GO:1990071	TRAPPII protein complex	1	0	0.03	0.38601
GO:0019867	outer membrane	43	1	1.32	0.38912
GO:0005685	U1 snRNP	17	0	0.52	0.39025
GO:0031968	organelle outer membrane	38	1	1.17	0.39123
GO:0000793	condensed chromosome	26	0	0.8	0.39218
GO:0000940	condensed chromosome outer kinetochore	2	0	0.06	0.39624
GO:0000777	condensed chromosome kinetochore	2	0	0.06	0.39624
GO:0009349	riboflavin synthase complex	1	0	0.03	0.39791
GO:0005778	peroxisomal membrane	11	0	0.34	0.398
GO:0031903	microbody membrane	11	0	0.34	0.398
GO:0005672	transcription factor TFIIA complex	1	0	0.03	0.39932
GO:0008622	epsilon DNA polymerase complex	3	0	0.09	0.40323
GO:0009501	amyloplast	9	0	0.28	0.40591
GO:0032389	MutLalpha complex	3	0	0.09	0.40646
GO:0042597	periplasmic space	4	0	0.12	0.40998
GO:0030313	cell envelope	4	0	0.12	0.40998
GO:0030288	outer membrane-bounded periplasmic space	4	0	0.12	0.40998
GO:0009897	external side of plasma membrane	5	1	0.15	0.41167
GO:0043527	tRNA methyltransferase complex	6	0	0.18	0.41874
GO:0019013	viral nucleocapsid	45	0	1.38	0.41923
GO:0044614	nuclear pore cytoplasmic filaments	1	0	0.03	0.42701
GO:0070772	PAS complex	1	0	0.03	0.42965
GO:0000153	cytoplasmic ubiquitin ligase complex	2	0	0.06	0.43085
GO:0005829	cytosol	797	16	24.51	0.43448
GO:0033096	amyloplast envelope	1	0	0.03	0.43449
GO:0033097	amyloplast membrane	1	0	0.03	0.43449
GO:0000313	organellar ribosome	33	0	1.01	0.44385
GO:0090575	RNA polymerase II transcription factor complex	27	2	0.83	0.44786
GO:0044798	nuclear transcription factor complex	27	2	0.83	0.44786
GO:0005876	spindle microtubule	8	0	0.25	0.44941
GO:0005762	mitochondrial large ribosomal subunit	23	0	0.71	0.45029
GO:0000315	organellar large ribosomal subunit	23	0	0.71	0.45029
GO:0008275	gamma-tubulin small complex	2	0	0.06	0.45642
GO:0009574	preprophase band	1	0	0.03	0.45705
GO:0032541	cortical endoplasmic reticulum	2	0	0.06	0.45827
GO:0005787	signal peptidase complex	7	0	0.22	0.45966
GO:0019005	SCF ubiquitin ligase complex	14	1	0.43	0.46015
GO:0031978	plastid thylakoid lumen	11	0	0.34	0.46074
GO:0009543	chloroplast thylakoid lumen	11	0	0.34	0.46074
GO:0005783	endoplasmic reticulum	389	22	11.96	0.46111
GO:0044438	microbody part	18	0	0.55	0.46129
GO:0044439	peroxisomal part	18	0	0.55	0.46129
GO:0010319	stromule	14	0	0.43	0.46534
GO:0000407	pre-autophagosomal structure	8	0	0.25	0.46924
GO:0044429	mitochondrial part	255	5	7.84	0.47037
GO:0005732	small nucleolar ribonucleoprotein complex	26	0	0.8	0.4715
GO:0032301	MutSalpha complex	2	0	0.06	0.47228
GO:0045259	proton-transporting ATP synthase complex	58	2	1.78	0.4774
GO:0016589	NURF complex	4	0	0.12	0.47741
GO:0031010	ISWI-type complex	4	0	0.12	0.47741
GO:0031985	Golgi cisterna	3	0	0.09	0.47838
GO:0000408	EKC/KEOPS complex	4	0	0.12	0.47879
GO:0005942	phosphatidylinositol 3-kinase complex	5	0	0.15	0.47922
GO:0042995	cell projection	21	0	0.65	0.48035
GO:0048476	Holliday junction resolvase complex	1	0	0.03	0.482
GO:0031515	tRNA (m1A) methyltransferase complex	5	0	0.15	0.48415
GO:0031312	extrinsic component of organelle membrane	4	0	0.12	0.48444
GO:0031298	replication fork protection complex	5	0	0.15	0.48453
GO:0005811	lipid droplet	16	1	0.49	0.48767
GO:0005750	mitochondrial respiratory chain complex III	5	0	0.15	0.48901
GO:0000502	proteasome complex	70	1	2.15	0.49759
GO:0005875	microtubule associated complex	64	0	1.97	0.49814
GO:0031350	intrinsic component of plastid membrane	3	0	0.09	0.49826
GO:0031351	integral component of plastid membrane	3	0	0.09	0.49826
GO:0009707	chloroplast outer membrane	16	0	0.49	0.49887
GO:0016020	membrane	6880	248	211.58	0.50241
GO:0016471	vacuolar proton-transporting V-type ATPase complex	15	0	0.46	0.50831
GO:0009575	chromoplast stroma	2	0	0.06	0.51011
GO:0019028	viral capsid	47	0	1.45	0.51068
GO:0000835	ER ubiquitin ligase complex	1	0	0.03	0.5122
GO:0000836	Hrd1p ubiquitin ligase complex	1	0	0.03	0.5122
GO:0005664	nuclear origin of replication recognition complex	2	0	0.06	0.51716
GO:0005761	mitochondrial ribosome	32	0	0.98	0.51752
GO:0048046	apoplast	114	8	3.51	0.51789
GO:0071007	U2-type catalytic step 2 spliceosome	1	0	0.03	0.5185
GO:0008540	proteasome regulatory particle, base subcomplex	10	0	0.31	0.52319
GO:0000794	condensed nuclear chromosome	16	0	0.49	0.52486
GO:1990429	peroxisomal importomer complex	1	0	0.03	0.5249
GO:1990415	Pex17p-Pex14p docking complex	1	0	0.03	0.5249
GO:0098552	side of membrane	13	1	0.4	0.52565
GO:0022626	cytosolic ribosome	205	3	6.3	0.52628
GO:0031966	mitochondrial membrane	179	5	5.5	0.53042
GO:0005784	Sec61 translocon complex	2	0	0.06	0.5329
GO:0071256	translocon complex	2	0	0.06	0.5329
GO:0044445	cytosolic part	229	4	7.04	0.53608
GO:0000938	GARP complex	3	0	0.09	0.53765
GO:0033176	proton-transporting V-type ATPase complex	28	0	0.86	0.53911
GO:0048188	Set1C/COMPASS complex	4	0	0.12	0.54199
GO:0035097	histone methyltransferase complex	4	0	0.12	0.54199
GO:0005871	kinesin complex	46	0	1.41	0.54225
GO:0005758	mitochondrial intermembrane space	8	0	0.25	0.55052
GO:0031970	organelle envelope lumen	8	0	0.25	0.55052
GO:0000779	condensed chromosome, centromeric region	5	0	0.15	0.55325
GO:0044391	ribosomal subunit	286	2	8.8	0.55334
GO:0005764	lysosome	33	0	1.01	0.55376
GO:0005938	cell cortex	32	0	0.98	0.55421
GO:0030015	CCR4-NOT core complex	9	0	0.28	0.55969
GO:0031414	N-terminal protein acetyltransferase complex	4	0	0.12	0.56074
GO:0034708	methyltransferase complex	10	0	0.31	0.56354
GO:0000439	core TFIIH complex	5	0	0.15	0.5668
GO:0034045	pre-autophagosomal structure membrane	6	0	0.18	0.56701
GO:0005687	U4 snRNP	10	0	0.31	0.57511
GO:0044455	mitochondrial membrane part	87	4	2.68	0.57671
GO:0009527	plastid outer membrane	18	0	0.55	0.5791
GO:0071013	catalytic step 2 spliceosome	45	1	1.38	0.57986
GO:0005779	integral component of peroxisomal membrane	3	0	0.09	0.58604
GO:0031231	intrinsic component of peroxisomal membrane	3	0	0.09	0.58604
GO:0070765	gamma-secretase complex	1	0	0.03	0.58657
GO:0005785	signal recognition particle receptor complex	2	0	0.06	0.58839
GO:0005956	protein kinase CK2 complex	5	0	0.15	0.59282
GO:0080085	signal recognition particle, chloroplast targeting	2	0	0.06	0.59301
GO:0044423	virion part	51	0	1.57	0.59848
GO:0019012	virion	51	0	1.57	0.59848
GO:0005813	centrosome	11	0	0.34	0.59988
GO:0000220	vacuolar proton-transporting V-type ATPase, V0 domain	6	0	0.18	0.60114
GO:0005765	lysosomal membrane	6	0	0.18	0.60146
GO:0030688	preribosome, small subunit precursor	2	0	0.06	0.60343
GO:0005686	U2 snRNP	28	1	0.86	0.60374
GO:0031965	nuclear membrane	9	0	0.28	0.6055
GO:0005744	mitochondrial inner membrane presequence translocase complex	9	1	0.28	0.60646
GO:0019866	organelle inner membrane	171	5	5.26	0.60779
GO:0005771	multivesicular body	2	0	0.06	0.60805
GO:0009504	cell plate	13	0	0.4	0.60836
GO:0030137	COPI-coated vesicle	14	1	0.43	0.60839
GO:0030663	COPI-coated vesicle membrane	14	1	0.43	0.60839
GO:0071021	U2-type post-spliceosomal complex	2	0	0.06	0.61008
GO:0000148	1,3-beta-D-glucan synthase complex	13	0	0.4	0.61121
GO:0071010	prespliceosome	19	1	0.58	0.61185
GO:0005847	mRNA cleavage and polyadenylation specificity factor complex	2	0	0.06	0.61309
GO:0046540	U4/U6 x U5 tri-snRNP complex	31	0	0.95	0.61341
GO:1902554	serine/threonine protein kinase complex	11	0	0.34	0.61426
GO:0044448	cell cortex part	23	0	0.71	0.61503
GO:0070469	respiratory chain	66	3	2.03	0.61539
GO:0005576	extracellular region	362	19	11.13	0.61649
GO:0016272	prefoldin complex	7	0	0.22	0.62278
GO:0009539	photosystem II reaction center	6	0	0.18	0.62344
GO:0000323	lytic vacuole	34	0	1.05	0.62461
GO:0071782	endoplasmic reticulum tubular network	4	0	0.12	0.62528
GO:0005819	spindle	21	1	0.65	0.62929
GO:0035861	site of double-strand break	2	0	0.06	0.63148
GO:0000808	origin recognition complex	5	0	0.15	0.6322
GO:0005739	mitochondrion	798	12	24.54	0.63363
GO:0005786	signal recognition particle, endoplasmic reticulum targeting	8	0	0.25	0.6357
GO:0030093	chloroplast photosystem I	1	0	0.03	0.64066
GO:0000176	nuclear exosome (RNase complex)	6	0	0.18	0.6411
GO:0032993	protein-DNA complex	97	3	2.98	0.64405
GO:0033178	proton-transporting two-sector ATPase complex, catalytic domain	49	2	1.51	0.64829
GO:1990316	ATG1/ULK1 kinase complex	2	0	0.06	0.65246
GO:0045263	proton-transporting ATP synthase complex, coupling factor F(o)	30	1	0.92	0.65405
GO:0005953	CAAX-protein geranylgeranyltransferase complex	2	0	0.06	0.6565
GO:0022627	cytosolic small ribosomal subunit	60	1	1.85	0.65934
GO:0000974	Prp19 complex	7	0	0.22	0.66247
GO:0000813	ESCRT I complex	2	0	0.06	0.66385
GO:0031261	DNA replication preinitiation complex	6	0	0.18	0.66511
GO:0005743	mitochondrial inner membrane	143	3	4.4	0.66524
GO:0043224	nuclear SCF ubiquitin ligase complex	2	0	0.06	0.6658
GO:0031462	Cul2-RING ubiquitin ligase complex	2	0	0.06	0.6658
GO:0031467	Cul7-RING ubiquitin ligase complex	2	0	0.06	0.6658
GO:0030286	dynein complex	10	0	0.31	0.66846
GO:0070652	HAUS complex	4	0	0.12	0.67047
GO:0012511	monolayer-surrounded lipid storage body	11	0	0.34	0.67138
GO:0033180	proton-transporting V-type ATPase, V1 domain	10	0	0.31	0.6731
GO:0005746	mitochondrial respiratory chain	33	1	1.01	0.67476
GO:0005759	mitochondrial matrix	68	0	2.09	0.67492
GO:0000177	cytoplasmic exosome (RNase complex)	5	0	0.15	0.67498
GO:0000243	commitment complex	7	0	0.22	0.67822
GO:0071012	catalytic step 1 spliceosome	5	0	0.15	0.67912
GO:0000159	protein phosphatase type 2A complex	15	0	0.46	0.68011
GO:0015630	microtubule cytoskeleton	135	2	4.15	0.68322
GO:0042575	DNA polymerase complex	7	0	0.22	0.68473
GO:0000931	gamma-tubulin large complex	2	0	0.06	0.68856
GO:0008274	gamma-tubulin ring complex	2	0	0.06	0.68856
GO:0031012	extracellular matrix	3	0	0.09	0.69558
GO:0000312	plastid small ribosomal subunit	2	0	0.06	0.69589
GO:0005782	peroxisomal matrix	7	0	0.22	0.6965
GO:0031907	microbody lumen	7	0	0.22	0.6965
GO:0000109	nucleotide-excision repair complex	5	0	0.15	0.69947
GO:0044430	cytoskeletal part	163	4	5.01	0.70005
GO:0031616	spindle pole centrosome	3	0	0.09	0.7011
GO:0032133	chromosome passenger complex	3	0	0.09	0.7011
GO:0000780	condensed nuclear chromosome, centromeric region	3	0	0.09	0.7011
GO:0051233	spindle midzone	3	0	0.09	0.7011
GO:0005747	mitochondrial respiratory chain complex I	24	1	0.74	0.70419
GO:1990423	RZZ complex	1	0	0.03	0.70566
GO:0071004	U2-type prespliceosome	16	1	0.49	0.70661
GO:0016592	mediator complex	20	0	0.62	0.71098
GO:0008541	proteasome regulatory particle, lid subcomplex	8	0	0.25	0.71372
GO:0030896	checkpoint clamp complex	4	0	0.12	0.71595
GO:0071014	post-mRNA release spliceosomal complex	2	0	0.06	0.716
GO:0033177	proton-transporting two-sector ATPase complex, proton-transporting domain	47	1	1.45	0.71654
GO:0031248	protein acetyltransferase complex	27	0	0.83	0.71814
GO:1902493	acetyltransferase complex	27	0	0.83	0.71814
GO:0031597	cytosolic proteasome complex	9	0	0.28	0.71856
GO:0000145	exocyst	18	0	0.55	0.72008
GO:0008287	protein serine/threonine phosphatase complex	16	0	0.49	0.72217
GO:1903293	phosphatase complex	16	0	0.49	0.72217
GO:0008352	katanin complex	1	0	0.03	0.72296
GO:0030008	TRAPP complex	7	0	0.22	0.72335
GO:0016469	proton-transporting two-sector ATPase complex	94	3	2.89	0.72452
GO:0008290	F-actin capping protein complex	2	0	0.06	0.72917
GO:0030897	HOPS complex	8	0	0.25	0.73137
GO:0098588	bounding membrane of organelle	458	12	14.08	0.73175
GO:0044444	cytoplasmic part	4112	94	126.46	0.73271
GO:0000314	organellar small ribosomal subunit	8	0	0.25	0.73397
GO:0033588	Elongator holoenzyme complex	3	0	0.09	0.73527
GO:0019031	viral envelope	4	0	0.12	0.7383
GO:0036338	viral membrane	4	0	0.12	0.7383
GO:0009512	cytochrome b6f complex	2	0	0.06	0.73876
GO:0009930	longitudinal side of cell surface	1	0	0.03	0.74191
GO:0045239	tricarboxylic acid cycle enzyme complex	5	0	0.15	0.7428
GO:0030529	intracellular ribonucleoprotein complex	832	10	25.59	0.74361
GO:0009571	proplastid stroma	1	0	0.03	0.74565
GO:0005689	U12-type spliceosomal complex	23	1	0.71	0.74846
GO:0031416	NatB complex	2	0	0.06	0.74886
GO:0000015	phosphopyruvate hydratase complex	7	1	0.22	0.75471
GO:0015935	small ribosomal subunit	103	1	3.17	0.75519
GO:0033263	CORVET complex	2	0	0.06	0.75541
GO:0000418	DNA-directed RNA polymerase IV complex	2	0	0.06	0.75841
GO:0005658	alpha DNA polymerase:primase complex	1	0	0.03	0.75917
GO:0031358	intrinsic component of chloroplast outer membrane	2	0	0.06	0.76036
GO:0031359	integral component of chloroplast outer membrane	2	0	0.06	0.76036
GO:0031354	intrinsic component of plastid outer membrane	2	0	0.06	0.76036
GO:0031355	integral component of plastid outer membrane	2	0	0.06	0.76036
GO:0030076	light-harvesting complex	2	0	0.06	0.76321
GO:0000346	transcription export complex	2	0	0.06	0.76393
GO:0000445	THO complex part of transcription export complex	2	0	0.06	0.76393
GO:0034457	Mpp10 complex	4	0	0.12	0.76398
GO:0030427	site of polarized growth	1	0	0.03	0.76521
GO:0005769	early endosome	4	0	0.12	0.76557
GO:0030981	cortical microtubule cytoskeleton	3	0	0.09	0.76768
GO:0030863	cortical cytoskeleton	3	0	0.09	0.76768
GO:0005777	peroxisome	91	4	2.8	0.76786
GO:0042579	microbody	91	4	2.8	0.76786
GO:0009986	cell surface	7	1	0.22	0.77054
GO:0005802	trans-Golgi network	95	3	2.92	0.77101
GO:0000790	nuclear chromatin	23	2	0.71	0.7727
GO:0071458	integral component of cytoplasmic side of endoplasmic reticulum membrane	5	0	0.15	0.775
GO:0098553	lumenal side of endoplasmic reticulum membrane	5	0	0.15	0.775
GO:0098554	cytoplasmic side of endoplasmic reticulum membrane	5	0	0.15	0.775
GO:0098576	lumenal side of membrane	5	0	0.15	0.775
GO:0071556	integral component of lumenal side of endoplasmic reticulum membrane	5	0	0.15	0.775
GO:0010287	plastoglobule	37	2	1.14	0.77646
GO:0005874	microtubule	70	1	2.15	0.77669
GO:0032153	cell division site	6	0	0.18	0.77818
GO:0080008	Cul4-RING E3 ubiquitin ligase complex	15	0	0.46	0.77859
GO:0005681	spliceosomal complex	100	1	3.08	0.77909
GO:0005797	Golgi medial cisterna	1	0	0.03	0.78212
GO:0031969	chloroplast membrane	49	2	1.51	0.78884
GO:0044427	chromosomal part	156	3	4.8	0.78979
GO:0005801	cis-Golgi network	4	0	0.12	0.78991
GO:0045495	pole plasm	2	0	0.06	0.7904
GO:0060293	germ plasm	2	0	0.06	0.7904
GO:0043186	P granule	2	0	0.06	0.7904
GO:0005838	proteasome regulatory particle	18	0	0.55	0.7944
GO:0022624	proteasome accessory complex	18	0	0.55	0.7944
GO:0031209	SCAR complex	1	0	0.03	0.79735
GO:0009341	beta-galactosidase complex	1	0	0.03	0.79918
GO:0009570	chloroplast stroma	246	6	7.57	0.79946
GO:0017119	Golgi transport complex	9	0	0.28	0.80293
GO:0097525	spliceosomal snRNP complex	36	0	1.11	0.80618
GO:0097526	spliceosomal tri-snRNP complex	36	0	1.11	0.80618
GO:0044436	thylakoid part	307	5	9.44	0.81039
GO:0009317	acetyl-CoA carboxylase complex	7	0	0.22	0.81045
GO:0005856	cytoskeleton	193	5	5.94	0.81219
GO:0043076	megasporocyte nucleus	1	0	0.03	0.81283
GO:0043078	polar nucleus	1	0	0.03	0.81283
GO:0030915	Smc5-Smc6 complex	5	0	0.15	0.8131
GO:0030095	chloroplast photosystem II	1	0	0.03	0.81359
GO:0000791	euchromatin	2	0	0.06	0.81465
GO:0031415	NatA complex	1	0	0.03	0.81682
GO:0030956	glutamyl-tRNA(Gln) amidotransferase complex	1	0	0.03	0.81818
GO:0012505	endomembrane system	919	37	28.26	0.82072
GO:0034388	Pwp2p-containing subcomplex of 90S preribosome	4	0	0.12	0.82076
GO:0031080	nuclear pore outer ring	1	0	0.03	0.82323
GO:0019898	extrinsic component of membrane	37	1	1.14	0.82517
GO:0005753	mitochondrial proton-transporting ATP synthase complex	16	1	0.49	0.82529
GO:0005885	Arp2/3 protein complex	7	0	0.22	0.82567
GO:0009360	DNA polymerase III complex	1	0	0.03	0.8279
GO:0009522	photosystem I	49	0	1.51	0.82882
GO:0016328	lateral plasma membrane	1	0	0.03	0.83088
GO:0045254	pyruvate dehydrogenase complex	1	0	0.03	0.83302
GO:0000221	vacuolar proton-transporting V-type ATPase, V1 domain	4	0	0.12	0.83503
GO:0043036	starch grain	2	0	0.06	0.83519
GO:0036452	ESCRT complex	6	0	0.18	0.83698
GO:0019008	molybdopterin synthase complex	3	0	0.09	0.83726
GO:0009532	plastid stroma	253	6	7.78	0.83801
GO:0055028	cortical microtubule	2	0	0.06	0.83842
GO:0005881	cytoplasmic microtubule	2	0	0.06	0.83842
GO:0044454	nuclear chromosome part	58	2	1.78	0.84428
GO:0035145	exon-exon junction complex	3	0	0.09	0.84504
GO:0042170	plastid membrane	53	2	1.63	0.84716
GO:0034719	SMN-Sm protein complex	3	0	0.09	0.84716
GO:0000229	cytoplasmic chromosome	5	0	0.15	0.85241
GO:0009508	plastid chromosome	5	0	0.15	0.85241
GO:0031252	cell leading edge	4	0	0.12	0.85456
GO:0031253	cell projection membrane	4	0	0.12	0.85456
GO:0031256	leading edge membrane	4	0	0.12	0.85456
GO:0044463	cell projection part	4	0	0.12	0.85456
GO:0001726	ruffle	4	0	0.12	0.85456
GO:0032587	ruffle membrane	4	0	0.12	0.85456
GO:0071821	FANCM-MHF complex	1	0	0.03	0.85467
GO:0098562	cytoplasmic side of membrane	7	0	0.22	0.8632
GO:0005663	DNA replication factor C complex	5	0	0.15	0.86432
GO:0000123	histone acetyltransferase complex	12	0	0.37	0.86476
GO:0000922	spindle pole	9	0	0.28	0.86613
GO:0042555	MCM complex	7	0	0.22	0.86913
GO:0019773	proteasome core complex, alpha-subunit complex	12	0	0.37	0.87257
GO:0009517	PSII associated light-harvesting complex II	1	0	0.03	0.87363
GO:0009503	thylakoid light-harvesting complex	1	0	0.03	0.87363
GO:0000276	mitochondrial proton-transporting ATP synthase complex, coupling factor F(o)	9	0	0.28	0.87621
GO:0031595	nuclear proteasome complex	10	0	0.31	0.88004
GO:0010168	ER body	2	0	0.06	0.8832
GO:0034715	pICln-Sm protein complex	1	0	0.03	0.88355
GO:0032155	cell division site part	5	0	0.15	0.88364
GO:0005816	spindle pole body	5	0	0.15	0.88364
GO:0000923	equatorial microtubule organizing center	5	0	0.15	0.88364
GO:0031463	Cul3-RING ubiquitin ligase complex	13	0	0.4	0.88394
GO:0005578	proteinaceous extracellular matrix	1	0	0.03	0.88605
GO:0030684	preribosome	73	1	2.24	0.88625
GO:0000814	ESCRT II complex	4	0	0.12	0.88815
GO:0031234	extrinsic component of cytoplasmic side of plasma membrane	5	0	0.15	0.89111
GO:0019897	extrinsic component of plasma membrane	5	0	0.15	0.89111
GO:0005834	heterotrimeric G-protein complex	5	0	0.15	0.89111
GO:0034271	phosphatidylinositol 3-kinase complex, class III, type I	3	0	0.09	0.89225
GO:0034272	phosphatidylinositol 3-kinase complex, class III, type II	3	0	0.09	0.89225
GO:0016607	nuclear speck	8	0	0.25	0.89279
GO:0005665	DNA-directed RNA polymerase II, core complex	19	0	0.58	0.89364
GO:1990072	TRAPPIII protein complex	1	0	0.03	0.89383
GO:0017053	transcriptional repressor complex	1	0	0.03	0.89404
GO:0031201	SNARE complex	38	0	1.17	0.89611
GO:0016591	DNA-directed RNA polymerase II, holoenzyme	44	2	1.35	0.89674
GO:0005793	endoplasmic reticulum-Golgi intermediate compartment	6	0	0.18	0.89974
GO:0010009	cytoplasmic side of endosome membrane	2	0	0.06	0.89975
GO:0000124	SAGA complex	2	0	0.06	0.90137
GO:0070390	transcription export complex 2	2	0	0.06	0.90137
GO:0070461	SAGA-type complex	2	0	0.06	0.90137
GO:0071819	DUBm complex	2	0	0.06	0.90137
GO:0000786	nucleosome	70	3	2.15	0.90169
GO:1990104	DNA bending complex	70	3	2.15	0.90169
GO:0044815	DNA packaging complex	70	3	2.15	0.90169
GO:0005719	nuclear euchromatin	1	0	0.03	0.90259
GO:0005763	mitochondrial small ribosomal subunit	7	0	0.22	0.90284
GO:0005815	microtubule organizing center	16	0	0.49	0.90521
GO:0005736	DNA-directed RNA polymerase I complex	19	0	0.58	0.9054
GO:0030681	multimeric ribonuclease P complex	11	0	0.34	0.90618
GO:0030677	ribonuclease P complex	11	0	0.34	0.90618
GO:0005655	nucleolar ribonuclease P complex	11	0	0.34	0.90618
GO:0030136	clathrin-coated vesicle	12	0	0.37	0.90655
GO:0005682	U5 snRNP	16	0	0.49	0.9077
GO:0098589	membrane region	162	5	4.98	0.90777
GO:0031461	cullin-RING ubiquitin ligase complex	51	2	1.57	0.90884
GO:0044425	membrane part	4066	146	125.04	0.90916
GO:0031090	organelle membrane	659	18	20.27	0.90931
GO:0034274	Atg12-Atg5-Atg16 complex	1	0	0.03	0.9098
GO:0000785	chromatin	92	3	2.83	0.91124
GO:0030126	COPI vesicle coat	12	0	0.37	0.91215
GO:0005965	protein farnesyltransferase complex	3	0	0.09	0.91231
GO:0009579	thylakoid	385	6	11.84	0.91262
GO:0005634	nucleus	1751	34	53.85	0.91343
GO:0009569	chloroplast starch grain	1	0	0.03	0.91389
GO:0030660	Golgi-associated vesicle membrane	24	1	0.74	0.91508
GO:0031228	intrinsic component of Golgi membrane	4	0	0.12	0.91648
GO:0030173	integral component of Golgi membrane	4	0	0.12	0.91648
GO:0044440	endosomal part	30	0	0.92	0.9171
GO:0044432	endoplasmic reticulum part	176	9	5.41	0.91714
GO:0033281	TAT protein transport complex	2	0	0.06	0.91754
GO:0000506	glycosylphosphatidylinositol-N-acetylglucosaminyltransferase (GPI-GnT) complex	1	0	0.03	0.91772
GO:0031428	box C/D snoRNP complex	14	0	0.43	0.91935
GO:0042765	GPI-anchor transamidase complex	3	0	0.09	0.92085
GO:0033202	DNA helicase complex	4	0	0.12	0.9232
GO:0031011	Ino80 complex	4	0	0.12	0.9232
GO:0010008	endosome membrane	27	0	0.83	0.92509
GO:0005694	chromosome	200	3	6.15	0.92656
GO:0016602	CCAAT-binding factor complex	5	0	0.15	0.92664
GO:0005688	U6 snRNP	7	0	0.22	0.92757
GO:0005951	carbamoyl-phosphate synthase complex	1	0	0.03	0.92826
GO:0000347	THO complex	10	0	0.31	0.92981
GO:0030134	COPII-coated ER to Golgi transport vesicle	25	0	0.77	0.93045
GO:0009521	photosystem	108	1	3.32	0.931
GO:0042720	mitochondrial inner membrane peptidase complex	8	0	0.25	0.93361
GO:0044431	Golgi apparatus part	192	4	5.9	0.93447
GO:0005794	Golgi apparatus	410	13	12.61	0.93501
GO:0009328	phenylalanine-tRNA ligase complex	3	0	0.09	0.93635
GO:0012507	ER to Golgi transport vesicle membrane	22	0	0.68	0.93855
GO:0005656	nuclear pre-replicative complex	2	0	0.06	0.93981
GO:0036387	pre-replicative complex	2	0	0.06	0.93981
GO:0005742	mitochondrial outer membrane translocase complex	2	0	0.06	0.94269
GO:0044232	organelle membrane contact site	2	0	0.06	0.94579
GO:0071561	nucleus-vacuole junction	2	0	0.06	0.94579
GO:0030929	ADPG pyrophosphorylase complex	2	0	0.06	0.94673
GO:0030931	heterotetrameric ADPG pyrophosphorylase complex	2	0	0.06	0.94673
GO:0005768	endosome	127	1	3.91	0.9479
GO:0000228	nuclear chromosome	67	2	2.06	0.94835
GO:0032545	CURI complex	2	0	0.06	0.9493
GO:0034456	UTP-C complex	2	0	0.06	0.9493
GO:0030133	transport vesicle	31	0	0.95	0.94977
GO:0042175	nuclear outer membrane-endoplasmic reticulum membrane network	160	5	4.92	0.9509
GO:0005789	endoplasmic reticulum membrane	160	5	4.92	0.9509
GO:0044450	microtubule organizing center part	8	0	0.25	0.95204
GO:0000110	nucleotide-excision repair factor 1 complex	1	0	0.03	0.95236
GO:0030127	COPII vesicle coat	11	0	0.34	0.95383
GO:0005840	ribosome	540	8	16.61	0.95387
GO:0072546	ER membrane protein complex	5	0	0.15	0.95435
GO:0005749	mitochondrial respiratory chain complex II, succinate dehydrogenase complex (ubiquinone)	1	0	0.03	0.95528
GO:0045257	succinate dehydrogenase complex (ubiquinone)	1	0	0.03	0.95528
GO:0045281	succinate dehydrogenase complex	1	0	0.03	0.95528
GO:0045283	fumarate reductase complex	1	0	0.03	0.95528
GO:0045273	respiratory chain complex II	1	0	0.03	0.95528
GO:0030658	transport vesicle membrane	27	0	0.83	0.95612
GO:0005737	cytoplasm	4999	122	153.73	0.95673
GO:0000178	exosome (RNase complex)	9	0	0.28	0.95735
GO:0009507	chloroplast	1175	20	36.13	0.95874
GO:0045252	oxoglutarate dehydrogenase complex	4	0	0.12	0.95892
GO:0045240	dihydrolipoyl dehydrogenase complex	4	0	0.12	0.95892
GO:0005798	Golgi-associated vesicle	30	1	0.92	0.95929
GO:0030880	RNA polymerase complex	63	2	1.94	0.96024
GO:0055029	nuclear DNA-directed RNA polymerase complex	63	2	1.94	0.96024
GO:0000428	DNA-directed RNA polymerase complex	63	2	1.94	0.96024
GO:0038201	TOR complex	1	0	0.03	0.96205
GO:0031931	TORC1 complex	1	0	0.03	0.96205
GO:0030118	clathrin coat	22	0	0.68	0.96411
GO:0005666	DNA-directed RNA polymerase III complex	15	0	0.46	0.96471
GO:0033116	endoplasmic reticulum-Golgi intermediate compartment membrane	2	0	0.06	0.96541
GO:0031902	late endosome membrane	12	0	0.37	0.96603
GO:0005635	nuclear envelope	54	1	1.66	0.96627
GO:0005720	nuclear heterochromatin	1	0	0.03	0.96789
GO:0000792	heterochromatin	1	0	0.03	0.96789
GO:0070603	SWI/SNF superfamily-type complex	11	0	0.34	0.96855
GO:0030532	small nuclear ribonucleoprotein complex	70	1	2.15	0.96906
GO:0000139	Golgi membrane	74	2	2.28	0.9693
GO:0000788	nuclear nucleosome	3	0	0.09	0.96934
GO:0044796	DNA polymerase processivity factor complex	1	0	0.03	0.96964
GO:0043626	PCNA complex	1	0	0.03	0.96964
GO:0009537	proplastid	2	0	0.06	0.96993
GO:0043680	filiform apparatus	1	0	0.03	0.97061
GO:0043227	membrane-bounded organelle	4841	109	148.87	0.97125
GO:0030964	NADH dehydrogenase complex	28	1	0.86	0.97186
GO:0045271	respiratory chain complex I	28	1	0.86	0.97186
GO:0009536	plastid	1329	29	40.87	0.97216
GO:0043231	intracellular membrane-bounded organelle	4806	109	147.8	0.97233
GO:0000151	ubiquitin ligase complex	71	2	2.18	0.97249
GO:0005622	intracellular	7112	166	218.71	0.97286
GO:0005884	actin filament	2	0	0.06	0.97404
GO:0044424	intracellular part	6835	156	210.2	0.97408
GO:0030131	clathrin adaptor complex	15	0	0.46	0.97485
GO:0042651	thylakoid membrane	256	5	7.87	0.97537
GO:0016593	Cdc73/Paf1 complex	1	0	0.03	0.97544
GO:0030686	90S preribosome	16	0	0.49	0.97822
GO:0031975	envelope	477	10	14.67	0.97825
GO:0008023	transcription elongation factor complex	4	0	0.12	0.97889
GO:0046930	pore complex	35	0	1.08	0.97922
GO:0043190	ATP-binding cassette (ABC) transporter complex	6	0	0.18	0.97928
GO:0098533	ATPase dependent transmembrane transport complex	6	0	0.18	0.97928
GO:0031227	intrinsic component of endoplasmic reticulum membrane	23	0	0.71	0.97964
GO:0030176	integral component of endoplasmic reticulum membrane	23	0	0.71	0.97964
GO:0005643	nuclear pore	34	0	1.05	0.97981
GO:0031410	cytoplasmic vesicle	73	1	2.24	0.98129
GO:0031982	vesicle	73	1	2.24	0.98129
GO:0009523	photosystem II	74	1	2.28	0.9814
GO:0034357	photosynthetic membrane	290	5	8.92	0.98198
GO:0097346	INO80-type complex	6	0	0.18	0.98273
GO:0016023	cytoplasmic vesicle	67	1	2.06	0.98283
GO:0031988	vesicle	67	1	2.06	0.98283
GO:0031967	organelle envelope	473	10	14.55	0.98286
GO:0000152	nuclear ubiquitin ligase complex	12	0	0.37	0.98336
GO:0005770	late endosome	21	0	0.65	0.984
GO:0043226	organelle	5471	118	168.25	0.98407
GO:0043229	intracellular organelle	5456	118	167.79	0.9843
GO:0009513	etioplast	1	0	0.03	0.98485
GO:0048475	coated membrane	58	1	1.78	0.98513
GO:0030117	membrane coat	58	1	1.78	0.98513
GO:0009941	chloroplast envelope	215	4	6.61	0.98517
GO:0008250	oligosaccharyltransferase complex	6	0	0.18	0.98534
GO:1902562	H4 histone acetyltransferase complex	5	0	0.15	0.98559
GO:0043189	H4/H2A histone acetyltransferase complex	5	0	0.15	0.98559
GO:0035267	NuA4 histone acetyltransferase complex	5	0	0.15	0.98559
GO:0042646	plastid nucleoid	10	0	0.31	0.98621
GO:0005623	cell	8093	224	248.88	0.98653
GO:0000812	Swr1 complex	2	0	0.06	0.98665
GO:0044433	cytoplasmic vesicle part	52	1	1.6	0.98666
GO:0030135	coated vesicle	51	1	1.57	0.98692
GO:1990234	transferase complex	236	4	7.26	0.98697
GO:0045272	plasma membrane respiratory chain complex I	2	0	0.06	0.98711
GO:0070470	plasma membrane respiratory chain	2	0	0.06	0.98711
GO:0012506	vesicle membrane	47	1	1.45	0.98794
GO:0030659	cytoplasmic vesicle membrane	47	1	1.45	0.98794
GO:0005795	Golgi stack	10	0	0.31	0.98816
GO:0044464	cell part	8024	224	246.76	0.98828
GO:0090544	BAF-type complex	1	0	0.03	0.98873
GO:0030119	AP-type membrane coat adaptor complex	16	0	0.49	0.98936
GO:0030662	coated vesicle membrane	41	1	1.26	0.98948
GO:0005654	nucleoplasm	148	2	4.55	0.98953
GO:0016035	zeta DNA polymerase complex	1	0	0.03	0.98954
GO:0005851	eukaryotic translation initiation factor 2B complex	5	0	0.15	0.99008
GO:0030140	trans-Golgi network transport vesicle	6	0	0.18	0.99009
GO:0048471	perinuclear region of cytoplasm	1	0	0.03	0.99025
GO:0005680	anaphase-promoting complex	7	0	0.22	0.99026
GO:0005905	clathrin-coated pit	5	0	0.15	0.99174
GO:0030665	clathrin-coated vesicle membrane	5	0	0.15	0.99174
GO:0012510	trans-Golgi network transport vesicle membrane	5	0	0.15	0.99174
GO:0005850	eukaryotic translation initiation factor 2 complex	1	0	0.03	0.99185
GO:0043614	multi-eIF complex	1	0	0.03	0.99185
GO:0042406	extrinsic component of endoplasmic reticulum membrane	1	0	0.03	0.99191
GO:0000446	nucleoplasmic THO complex	1	0	0.03	0.99196
GO:0031519	PcG protein complex	1	0	0.03	0.99256
GO:0035102	PRC1 complex	1	0	0.03	0.99256
GO:0030120	vesicle coat	27	0	0.83	0.99307
GO:0055035	plastid thylakoid membrane	232	4	7.13	0.99317
GO:0009535	chloroplast thylakoid membrane	232	4	7.13	0.99317
GO:0000419	DNA-directed RNA polymerase V complex	3	0	0.09	0.99318
GO:0030125	clathrin vesicle coat	4	0	0.12	0.99339
GO:0030130	clathrin coat of trans-Golgi network vesicle	4	0	0.12	0.99339
GO:0030132	clathrin coat of coated pit	4	0	0.12	0.99339
GO:0043234	protein complex	1328	23	40.84	0.9936
GO:0005846	nuclear cap binding complex	2	0	0.06	0.99424
GO:0034518	RNA cap binding complex	2	0	0.06	0.99424
GO:0034515	proteasome storage granule	2	0	0.06	0.99458
GO:0000930	gamma-tubulin complex	7	0	0.22	0.99458
GO:0070449	elongin complex	1	0	0.03	0.99468
GO:1902494	catalytic complex	381	7	11.72	0.99471
GO:0005968	Rab-protein geranylgeranyltransferase complex	2	0	0.06	0.99534
GO:0032040	small-subunit processome	41	0	1.26	0.99577
GO:0031981	nuclear lumen	362	6	11.13	0.99694
GO:0009534	chloroplast thylakoid	284	4	8.73	0.99711
GO:0031976	plastid thylakoid	285	5	8.76	0.99717
GO:0031984	organelle subcompartment	288	5	8.86	0.99732
GO:0044434	chloroplast part	627	13	19.28	0.99752
GO:0070013	intracellular organelle lumen	449	10	13.81	0.99782
GO:0043233	organelle lumen	449	10	13.81	0.99782
GO:0031974	membrane-enclosed lumen	457	10	14.05	0.99789
GO:0044611	nuclear pore inner ring	3	0	0.09	0.99821
GO:0009295	nucleoid	16	0	0.49	0.99831
GO:0030139	endocytic vesicle	2	0	0.06	0.9984
GO:0032991	macromolecular complex	2120	34	65.2	0.99879
GO:0044428	nuclear part	582	9	17.9	0.99882
GO:0031360	intrinsic component of thylakoid membrane	2	0	0.06	0.99893
GO:0031361	integral component of thylakoid membrane	2	0	0.06	0.99893
GO:0044452	nucleolar part	61	0	1.88	0.99898
GO:0009526	plastid envelope	232	4	7.13	0.99915
GO:0044451	nucleoplasm part	124	2	3.81	0.99962
GO:0042644	chloroplast nucleoid	3	0	0.09	0.99968
GO:0005674	transcription factor TFIIF complex	1	0	0.03	0.99974
GO:0009330	DNA topoisomerase complex (ATP-hydrolyzing)	1	0	0.03	0.99982
GO:0000164	protein phosphatase type 1 complex	1	0	0.03	0.99985
GO:0097361	CIA complex	1	0	0.03	0.99986
GO:0044435	plastid part	640	14	19.68	0.99989
GO:0016604	nuclear body	20	0	0.62	0.99994
GO:0009840	chloroplastic endopeptidase Clp complex	3	0	0.09	0.99997
GO:0009368	endopeptidase Clp complex	3	0	0.09	0.99997
GO:0015030	Cajal body	9	0	0.28	0.99997
GO:0035061	interchromatin granule	1	0	0.03	0.99999
GO:0005730	nucleolus	160	1	4.92	1
GO:0043228	non-membrane-bounded organelle	1110	17	34.14	1
GO:0044422	organelle part	2433	48	74.82	1
GO:0043232	intracellular non-membrane-bounded organelle	1110	17	34.14	1
GO:0044446	intracellular organelle part	2425	48	74.58	1
GO:0005575	cellular_component	12259	377	377	1

## Sheet: Molecular Function (MF)
Table S3. TopGO enrichment result file of differentially expressed genes (MF)
GO.ID	Term	Annotated	Significant	Expected	KS
GO:0016620	oxidoreductase activity, acting on the aldehyde or oxo group of donors, NAD or NADP as acceptor	91	8	3.13	0.00052
GO:0009982	pseudouridine synthase activity	14	1	0.48	0.00095
GO:0016878	acid-thiol ligase activity	15	5	0.52	0.00109
GO:0032550	purine ribonucleoside binding	1735	68	59.65	0.0017
GO:0035639	purine ribonucleoside triphosphate binding	1724	68	59.27	0.00225
GO:0005086	ARF guanyl-nucleotide exchange factor activity	10	3	0.34	0.0029
GO:0022857	transmembrane transporter activity	991	80	34.07	0.00318
GO:0030246	carbohydrate binding	151	9	5.19	0.00415
GO:0016161	beta-amylase activity	4	1	0.14	0.00456
GO:0015079	potassium ion transmembrane transporter activity	58	7	1.99	0.00516
GO:0016671	oxidoreductase activity, acting on a sulfur group of donors, disulfide as acceptor	38	1	1.31	0.00602
GO:0090447	glycerol-3-phosphate 2-O-acyltransferase activity	10	3	0.34	0.00604
GO:0003978	UDP-glucose 4-epimerase activity	7	2	0.24	0.00798
GO:0032559	adenyl ribonucleotide binding	1486	60	51.09	0.00874
GO:0019239	deaminase activity	25	2	0.86	0.00884
GO:0016405	CoA-ligase activity	12	3	0.41	0.0089
GO:0016462	pyrophosphatase activity	828	37	28.47	0.00918
GO:0004553	hydrolase activity, hydrolyzing O-glycosyl compounds	334	22	11.48	0.0093
GO:0022891	substrate-specific transmembrane transporter activity	738	63	25.37	0.0103
GO:0004867	serine-type endopeptidase inhibitor activity	7	0	0.24	0.01055
GO:0005524	ATP binding	1475	60	50.71	0.0113
GO:0047184	1-acylglycerophosphocholine O-acyltransferase activity	4	0	0.14	0.01176
GO:0008135	translation factor activity, RNA binding	122	6	4.19	0.01198
GO:0003746	translation elongation factor activity	36	4	1.24	0.01222
GO:0015145	monosaccharide transmembrane transporter activity	29	6	1	0.01253
GO:0015081	sodium ion transmembrane transporter activity	8	1	0.28	0.01322
GO:0015925	galactosidase activity	28	1	0.96	0.01343
GO:0051119	sugar transmembrane transporter activity	59	13	2.03	0.01396
GO:0035312	5'-3' exodeoxyribonuclease activity	6	0	0.21	0.01423
GO:0017111	nucleoside-triphosphatase activity	807	37	27.75	0.01435
GO:0004029	aldehyde dehydrogenase (NAD) activity	13	2	0.45	0.01653
GO:0005355	glucose transmembrane transporter activity	28	6	0.96	0.01694
GO:0015149	hexose transmembrane transporter activity	28	6	0.96	0.01694
GO:0004766	spermidine synthase activity	6	1	0.21	0.01721
GO:0008559	xenobiotic-transporting ATPase activity	6	0	0.21	0.01725
GO:0042910	xenobiotic transporter activity	6	0	0.21	0.01725
GO:0022892	substrate-specific transporter activity	799	64	27.47	0.01752
GO:0022804	active transmembrane transporter activity	420	38	14.44	0.01906
GO:0015291	secondary active transmembrane transporter activity	180	23	6.19	0.01952
GO:0005351	sugar:proton symporter activity	31	6	1.07	0.01986
GO:0005402	cation:sugar symporter activity	31	6	1.07	0.01986
GO:0090439	tetraketide alpha-pyrone synthase activity	2	2	0.07	0.02041
GO:0016207	4-coumarate-CoA ligase activity	2	2	0.07	0.0208
GO:0003962	cystathionine gamma-synthase activity	2	2	0.07	0.02087
GO:0004713	protein tyrosine kinase activity	19	1	0.65	0.02174
GO:0031956	medium-chain fatty acid-CoA ligase activity	2	2	0.07	0.02187
GO:0009674	potassium:sodium symporter activity	2	2	0.07	0.02251
GO:0016746	transferase activity, transferring acyl groups	323	22	11.11	0.02263
GO:0009916	alternative oxidase activity	2	2	0.07	0.02378
GO:0016653	oxidoreductase activity, acting on NAD(P)H, heme protein as acceptor	10	2	0.34	0.02536
GO:0015293	symporter activity	43	10	1.48	0.02691
GO:0004462	lactoylglutathione lyase activity	7	0	0.24	0.02711
GO:0015197	peptide transporter activity	3	1	0.1	0.02721
GO:0004033	aldo-keto reductase (NADP) activity	3	0	0.1	0.02767
GO:0008265	Mo-molybdopterin cofactor sulfurase activity	2	0	0.07	0.02814
GO:0001758	retinal dehydrogenase activity	4	2	0.14	0.02873
GO:0004473	malate dehydrogenase (decarboxylating) (NADP+) activity	2	0	0.07	0.03162
GO:0003713	transcription coactivator activity	17	1	0.58	0.03195
GO:0004521	endoribonuclease activity	34	0	1.17	0.03525
GO:0004519	endonuclease activity	80	1	2.75	0.03527
GO:0008970	phosphatidylcholine 1-acylhydrolase activity	4	1	0.14	0.03698
GO:0030976	thiamine pyrophosphate binding	13	1	0.45	0.03709
GO:0003682	chromatin binding	58	1	1.99	0.03722
GO:0004180	carboxypeptidase activity	53	5	1.82	0.03725
GO:0016747	transferase activity, transferring acyl groups other than amino-acyl groups	239	19	8.22	0.03812
GO:0046857	oxidoreductase activity, acting on other nitrogenous compounds as donors, with NAD or NADP as acceptor	2	1	0.07	0.03932
GO:0004888	transmembrane signaling receptor activity	18	1	0.62	0.03944
GO:0015645	fatty acid ligase activity	9	4	0.31	0.04047
GO:0050638	taxadien-5-alpha-ol O-acetyltransferase activity	2	1	0.07	0.04064
GO:0010181	FMN binding	28	2	0.96	0.04147
GO:0015181	arginine transmembrane transporter activity	2	1	0.07	0.04284
GO:0015189	L-lysine transmembrane transporter activity	2	1	0.07	0.04284
GO:0003987	acetate-CoA ligase activity	8	1	0.28	0.04299
GO:0008422	beta-glucosidase activity	25	1	0.86	0.0435
GO:0004373	glycogen (starch) synthase activity	5	1	0.17	0.04559
GO:0004351	glutamate decarboxylase activity	3	1	0.1	0.04612
GO:0004421	hydroxymethylglutaryl-CoA synthase activity	2	1	0.07	0.04715
GO:0050661	NADP binding	55	4	1.89	0.04807
GO:0004525	ribonuclease III activity	7	0	0.24	0.04816
GO:0032296	double-stranded RNA-specific ribonuclease activity	7	0	0.24	0.04816
GO:0015926	glucosidase activity	45	2	1.55	0.0496
GO:0004565	beta-galactosidase activity	22	1	0.76	0.04961
GO:0005261	cation channel activity	32	1	1.1	0.05033
GO:0016920	pyroglutamyl-peptidase activity	3	0	0.1	0.05068
GO:0015116	sulfate transmembrane transporter activity	17	1	0.58	0.05116
GO:0016208	AMP binding	5	0	0.17	0.05216
GO:1901682	sulfur compound transmembrane transporter activity	19	1	0.65	0.05416
GO:0022820	potassium ion symporter activity	4	2	0.14	0.05488
GO:0008238	exopeptidase activity	78	5	2.68	0.05517
GO:1901681	sulfur compound binding	34	1	1.17	0.05548
GO:0032553	ribonucleotide binding	1763	70	60.62	0.05686
GO:0016295	myristoyl-[acyl-carrier-protein] hydrolase activity	2	0	0.07	0.05699
GO:0016296	palmitoyl-[acyl-carrier-protein] hydrolase activity	2	0	0.07	0.05699
GO:0016297	acyl-[acyl-carrier-protein] hydrolase activity	2	0	0.07	0.05699
GO:0004320	oleoyl-[acyl-carrier-protein] hydrolase activity	2	0	0.07	0.05699
GO:0015294	solute:cation symporter activity	37	6	1.27	0.05746
GO:0003840	obsolete gamma-glutamyltransferase activity	10	1	0.34	0.05746
GO:0016877	ligase activity, forming carbon-sulfur bonds	25	9	0.86	0.05748
GO:0033808	6'-deoxychalcone synthase activity	2	0	0.07	0.05753
GO:0046912	transferase activity, transferring acyl groups, acyl groups converted into alkyl on transfer	13	1	0.45	0.05856
GO:0004872	receptor activity	56	2	1.93	0.0591
GO:0022843	voltage-gated cation channel activity	27	1	0.93	0.05917
GO:0005249	voltage-gated potassium channel activity	27	1	0.93	0.05917
GO:0004459	L-lactate dehydrogenase activity	2	0	0.07	0.05975
GO:0050662	coenzyme binding	306	12	10.52	0.05999
GO:0052890	oxidoreductase activity, acting on the CH-CH group of donors, with a flavin as acceptor	15	0	0.52	0.0618
GO:0016210	naringenin-chalcone synthase activity	7	2	0.24	0.06283
GO:0015088	copper uptake transmembrane transporter activity	5	2	0.17	0.06289
GO:0005267	potassium channel activity	30	1	1.03	0.06405
GO:0015144	carbohydrate transmembrane transporter activity	96	14	3.3	0.06436
GO:0004107	chorismate synthase activity	2	0	0.07	0.06441
GO:0000400	four-way junction DNA binding	11	0	0.38	0.06559
GO:0000217	DNA secondary structure binding	11	0	0.38	0.06559
GO:0016151	nickel cation binding	5	1	0.17	0.06736
GO:1901476	carbohydrate transporter activity	97	14	3.34	0.06737
GO:0015245	fatty acid transporter activity	4	1	0.14	0.06741
GO:0004814	arginine-tRNA ligase activity	2	0	0.07	0.06765
GO:0060089	molecular transducer activity	140	3	4.81	0.06857
GO:0004871	signal transducer activity	140	3	4.81	0.06857
GO:0000989	transcription factor activity, transcription factor binding	60	2	2.06	0.06918
GO:0008134	transcription factor binding	25	1	0.86	0.06944
GO:0015295	solute:proton symporter activity	33	6	1.13	0.07033
GO:0043565	sequence-specific DNA binding	220	7	7.56	0.07126
GO:0052590	sn-glycerol-3-phosphate:ubiquinone oxidoreductase activity	3	0	0.1	0.0717
GO:0052591	sn-glycerol-3-phosphate:ubiquinone-8 oxidoreductase activity	3	0	0.1	0.0717
GO:0016901	oxidoreductase activity, acting on the CH-OH group of donors, quinone or similar compound as acceptor	3	0	0.1	0.0717
GO:0004368	glycerol-3-phosphate dehydrogenase activity	3	0	0.1	0.0717
GO:0008417	fucosyltransferase activity	4	0	0.14	0.07176
GO:0051537	2 iron, 2 sulfur cluster binding	32	0	1.1	0.07191
GO:0016814	hydrolase activity, acting on carbon-nitrogen (but not peptide) bonds, in cyclic amidines	19	1	0.65	0.07212
GO:0003924	GTPase activity	125	7	4.3	0.07386
GO:0004457	lactate dehydrogenase activity	4	0	0.14	0.07477
GO:0004747	ribokinase activity	9	2	0.31	0.07481
GO:0050113	inositol oxygenase activity	4	1	0.14	0.076
GO:0016229	steroid dehydrogenase activity	15	0	0.52	0.07638
GO:0042300	beta-amyrin synthase activity	2	0	0.07	0.07643
GO:0004668	protein-arginine deiminase activity	2	0	0.07	0.08102
GO:0047632	agmatine deiminase activity	2	0	0.07	0.08102
GO:0016892	endoribonuclease activity, producing 3'-phosphomonoesters	6	0	0.21	0.08133
GO:0005432	calcium:sodium antiporter activity	3	1	0.1	0.08246
GO:0019948	SUMO activating enzyme activity	4	0	0.14	0.08293
GO:0016798	hydrolase activity, acting on glycosyl bonds	443	33	15.23	0.08359
GO:0015399	primary active transmembrane transporter activity	245	15	8.42	0.08418
GO:0015405	P-P-bond-hydrolysis-driven transmembrane transporter activity	245	15	8.42	0.08418
GO:0022884	macromolecule transmembrane transporter activity	19	0	0.65	0.08458
GO:0008320	protein transmembrane transporter activity	19	0	0.65	0.08458
GO:0008840	4-hydroxy-tetrahydrodipicolinate synthase	4	0	0.14	0.08481
GO:0016701	oxidoreductase activity, acting on single donors with incorporation of molecular oxygen	46	6	1.58	0.08488
GO:0004806	triglyceride lipase activity	8	1	0.28	0.08551
GO:0003841	1-acylglycerol-3-phosphate O-acyltransferase activity	8	0	0.28	0.08571
GO:0009975	cyclase activity	2	1	0.07	0.08597
GO:0050203	oxalate-CoA ligase activity	3	2	0.1	0.08786
GO:0050269	coniferyl-aldehyde dehydrogenase activity	5	2	0.17	0.0886
GO:0016436	rRNA (uridine) methyltransferase activity	6	0	0.21	0.09016
GO:0008106	alcohol dehydrogenase (NADP+) activity	2	0	0.07	0.09149
GO:0008865	fructokinase activity	12	4	0.41	0.09508
GO:0004396	hexokinase activity	12	4	0.41	0.09508
GO:0035035	histone acetyltransferase binding	3	1	0.1	0.09509
GO:0008374	O-acyltransferase activity	85	9	2.92	0.09527
GO:0008169	C-methyltransferase activity	4	0	0.14	0.09621
GO:0009922	fatty acid elongase activity	2	0	0.07	0.09655
GO:0000213	tRNA-intron endonuclease activity	3	0	0.1	0.09675
GO:0003958	NADPH-hemoprotein reductase activity	4	2	0.14	0.09763
GO:0003854	3-beta-hydroxy-delta5-steroid dehydrogenase activity	9	0	0.31	0.09774
GO:0033764	steroid dehydrogenase activity, acting on the CH-OH group of donors, NAD or NADP as acceptor	9	0	0.31	0.09774
GO:0051745	4-hydroxy-3-methylbut-2-en-1-yl diphosphate reductase activity	2	0	0.07	0.09956
GO:0016843	amine-lyase activity	2	1	0.07	0.0996
GO:0003690	double-stranded DNA binding	40	1	1.38	0.09985
GO:0000062	fatty-acyl-CoA binding	19	0	0.65	0.10016
GO:0016668	oxidoreductase activity, acting on a sulfur group of donors, NAD(P) as acceptor	11	0	0.38	0.10024
GO:0004491	methylmalonate-semialdehyde dehydrogenase (acylating) activity	4	0	0.14	0.10081
GO:0004615	phosphomannomutase activity	4	1	0.14	0.10219
GO:0004651	polynucleotide 5'-phosphatase activity	4	0	0.14	0.10248
GO:0004484	mRNA guanylyltransferase activity	4	0	0.14	0.10248
GO:0045181	glutamate synthase activity, NAD(P)H as acceptor	2	0	0.07	0.10293
GO:0003994	aconitate hydratase activity	3	0	0.1	0.10405
GO:0015175	neutral amino acid transmembrane transporter activity	3	1	0.1	0.10467
GO:0019199	transmembrane receptor protein kinase activity	14	0	0.48	0.10493
GO:0016864	intramolecular oxidoreductase activity, transposing S-S bonds	21	0	0.72	0.10508
GO:0003756	protein disulfide isomerase activity	21	0	0.72	0.10508
GO:0009000	selenocysteine lyase activity	3	0	0.1	0.10609
GO:0030151	molybdenum ion binding	3	0	0.1	0.10609
GO:0016725	oxidoreductase activity, acting on CH or CH2 groups	17	0	0.58	0.10624
GO:0043492	ATPase activity, coupled to movement of substances	243	16	8.35	0.10665
GO:0000150	recombinase activity	9	0	0.31	0.10767
GO:0003959	NADPH dehydrogenase activity	3	1	0.1	0.10767
GO:0019107	myristoyltransferase activity	3	1	0.1	0.10791
GO:0004379	glycylpeptide N-tetradecanoyltransferase activity	3	1	0.1	0.10791
GO:0016866	intramolecular transferase activity	49	3	1.68	0.10797
GO:0043733	DNA-3-methylbase glycosylase activity	2	0	0.07	0.10809
GO:0008725	DNA-3-methyladenine glycosylase activity	2	0	0.07	0.10809
GO:0004857	enzyme inhibitor activity	98	4	3.37	0.10822
GO:0009881	photoreceptor activity	10	0	0.34	0.10856
GO:0042626	ATPase activity, coupled to transmembrane movement of substances	232	15	7.98	0.10907
GO:0015220	choline transmembrane transporter activity	2	1	0.07	0.10907
GO:0061134	peptidase regulator activity	15	1	0.52	0.10938
GO:0030414	peptidase inhibitor activity	15	1	0.52	0.10938
GO:0004312	fatty acid synthase activity	26	1	0.89	0.10975
GO:0004126	cytidine deaminase activity	2	0	0.07	0.1102
GO:0008113	peptide-methionine (S)-S-oxide reductase activity	2	0	0.07	0.11033
GO:0004097	catechol oxidase activity	2	0	0.07	0.1115
GO:0051540	metal cluster binding	114	2	3.92	0.11234
GO:0051536	iron-sulfur cluster binding	114	2	3.92	0.11234
GO:0047172	shikimate O-hydroxycinnamoyltransferase activity	2	1	0.07	0.11322
GO:0004536	deoxyribonuclease activity	33	1	1.13	0.11615
GO:0003691	double-stranded telomeric DNA binding	2	0	0.07	0.11776
GO:0098518	polynucleotide phosphatase activity	7	0	0.24	0.11789
GO:0018478	malonate-semialdehyde dehydrogenase (acetylating) activity	2	0	0.07	0.12015
GO:0030983	mismatched DNA binding	7	0	0.24	0.12113
GO:0070008	serine-type exopeptidase activity	44	4	1.51	0.12138
GO:0004582	dolichyl-phosphate beta-D-mannosyltransferase activity	4	0	0.14	0.12225
GO:0033743	peptide-methionine (R)-S-oxide reductase activity	6	1	0.21	0.12233
GO:0008568	microtubule-severing ATPase activity	27	1	0.93	0.12291
GO:0005215	transporter activity	1212	87	41.67	0.12403
GO:0015450	P-P-bond-hydrolysis-driven protein transmembrane transporter activity	8	0	0.28	0.12426
GO:0004076	biotin synthase activity	2	0	0.07	0.12736
GO:0004315	3-oxoacyl-[acyl-carrier-protein] synthase activity	14	0	0.48	0.13001
GO:0051287	NAD binding	88	4	3.03	0.13038
GO:0008138	protein tyrosine/serine/threonine phosphatase activity	16	0	0.55	0.13157
GO:0016894	endonuclease activity, active with either ribo- or deoxyribonucleic acids and producing 3'-phosphomonoesters	8	0	0.28	0.13207
GO:0016840	carbon-nitrogen lyase activity	15	2	0.52	0.13275
GO:0045548	phenylalanine ammonia-lyase activity	5	1	0.17	0.13378
GO:0004864	protein phosphatase inhibitor activity	13	1	0.45	0.13456
GO:0019212	phosphatase inhibitor activity	13	1	0.45	0.13456
GO:0019208	phosphatase regulator activity	13	1	0.45	0.13456
GO:0019888	protein phosphatase regulator activity	13	1	0.45	0.13456
GO:0022833	mechanically gated channel activity	3	0	0.1	0.13477
GO:0008381	mechanically-gated ion channel activity	3	0	0.1	0.13477
GO:0022858	alanine transmembrane transporter activity	1	1	0.03	0.13582
GO:0015180	L-alanine transmembrane transporter activity	1	1	0.03	0.13582
GO:0015185	gamma-aminobutyric acid transmembrane transporter activity	1	1	0.03	0.13582
GO:0016768	spermine synthase activity	1	1	0.03	0.136
GO:0050373	UDP-arabinose 4-epimerase activity	1	1	0.03	0.13672
GO:0001134	transcription factor activity, transcription factor recruiting	4	0	0.14	0.13672
GO:0001135	transcription factor activity, RNA polymerase II transcription factor recruiting	4	0	0.14	0.13672
GO:0004467	long-chain fatty acid-CoA ligase activity	8	3	0.28	0.13675
GO:0031559	oxidosqualene cyclase activity	5	0	0.17	0.13691
GO:0015292	uniporter activity	3	1	0.1	0.13695
GO:0004305	ethanolamine kinase activity	1	1	0.03	0.13766
GO:0016413	O-acetyltransferase activity	40	3	1.38	0.13867
GO:0015198	oligopeptide transporter activity	1	1	0.03	0.13927
GO:0035673	oligopeptide transmembrane transporter activity	1	1	0.03	0.13927
GO:0015095	magnesium ion transmembrane transporter activity	13	1	0.45	0.13965
GO:0005483	soluble NSF attachment protein activity	3	0	0.1	0.13982
GO:0016651	oxidoreductase activity, acting on NAD(P)H	137	6	4.71	0.13987
GO:0042162	telomeric DNA binding	4	0	0.14	0.13987
GO:0042171	lysophosphatidic acid acyltransferase activity	10	0	0.34	0.14009
GO:0071617	lysophospholipid acyltransferase activity	10	0	0.34	0.14009
GO:0008271	secondary active sulfate transmembrane transporter activity	10	0	0.34	0.14015
GO:0016844	strictosidine synthase activity	1	1	0.03	0.14096
GO:0004185	serine-type carboxypeptidase activity	42	4	1.44	0.14131
GO:0047714	galactolipase activity	5	1	0.17	0.14175
GO:0008420	CTD phosphatase activity	1	1	0.03	0.14193
GO:0003712	transcription cofactor activity	46	2	1.58	0.14263
GO:0016688	L-ascorbate peroxidase activity	5	1	0.17	0.14266
GO:0035671	enone reductase activity	6	0	0.21	0.14332
GO:0042084	5-methyltetrahydrofolate-dependent methyltransferase activity	2	1	0.07	0.14353
GO:0008705	methionine synthase activity	2	1	0.07	0.14353
GO:0051765	inositol tetrakisphosphate kinase activity	2	0	0.07	0.14396
GO:0047325	inositol tetrakisphosphate 1-kinase activity	2	0	0.07	0.14396
GO:0052725	inositol-1,3,4-trisphosphate 6-kinase activity	2	0	0.07	0.14396
GO:0052726	inositol-1,3,4-trisphosphate 5-kinase activity	2	0	0.07	0.14396
GO:0047063	L-ascorbate-cytochrome-b5 reductase activity	1	1	0.03	0.14421
GO:0009703	nitrate reductase (NADH) activity	1	1	0.03	0.14421
GO:0008940	nitrate reductase activity	1	1	0.03	0.14421
GO:0004795	threonine synthase activity	2	0	0.07	0.14529
GO:0022834	ligand-gated channel activity	1	1	0.03	0.14636
GO:0004970	ionotropic glutamate receptor activity	1	1	0.03	0.14636
GO:0005230	extracellular ligand-gated ion channel activity	1	1	0.03	0.14636
GO:0015276	ligand-gated ion channel activity	1	1	0.03	0.14636
GO:0008066	glutamate receptor activity	1	1	0.03	0.14636
GO:0016820	hydrolase activity, acting on acid anhydrides, catalyzing transmembrane movement of substances	241	15	8.29	0.14687
GO:0005199	structural constituent of cell wall	3	1	0.1	0.14812
GO:0018849	muconate cycloisomerase activity	4	0	0.14	0.14821
GO:0019842	vitamin binding	40	4	1.38	0.14867
GO:0050734	hydroxycinnamoyltransferase activity	4	2	0.14	0.14881
GO:0050737	O-hydroxycinnamoyltransferase activity	4	2	0.14	0.14881
GO:0097367	carbohydrate derivative binding	1789	70	61.51	0.14969
GO:0032555	purine ribonucleotide binding	1735	68	59.65	0.14979
GO:0004370	glycerol kinase activity	4	2	0.14	0.15018
GO:0005509	calcium ion binding	202	15	6.95	0.15048
GO:0004709	MAP kinase kinase kinase activity	16	0	0.55	0.1513
GO:0004347	glucose-6-phosphate isomerase activity	2	0	0.07	0.15142
GO:0035798	2-alkenal reductase (NADP+) activity	4	0	0.14	0.15152
GO:0052692	raffinose alpha-galactosidase activity	6	0	0.21	0.15186
GO:0004557	alpha-galactosidase activity	6	0	0.21	0.15186
GO:0016624	oxidoreductase activity, acting on the aldehyde or oxo group of donors, disulfide as acceptor	14	1	0.48	0.15192
GO:0046423	allene-oxide cyclase activity	1	1	0.03	0.15258
GO:0016629	12-oxophytodienoate reductase activity	1	1	0.03	0.15372
GO:0004793	threonine aldolase activity	1	1	0.03	0.15466
GO:0008732	L-allo-threonine aldolase activity	1	1	0.03	0.15466
GO:0019887	protein kinase regulator activity	25	0	0.86	0.15635
GO:0016891	endoribonuclease activity, producing 5'-phosphomonoesters	28	0	0.96	0.15708
GO:0015174	basic amino acid transmembrane transporter activity	3	1	0.1	0.15847
GO:0004411	homogentisate 1,2-dioxygenase activity	1	0	0.03	0.15858
GO:0072509	divalent inorganic cation transmembrane transporter activity	57	6	1.96	0.15883
GO:0004128	cytochrome-b5 reductase activity, acting on NAD(P)H	5	0	0.17	0.15936
GO:0000254	C-4 methylsterol oxidase activity	1	0	0.03	0.15939
GO:0015075	ion transmembrane transporter activity	607	47	20.87	0.16061
GO:0034002	(R)-limonene synthase activity	1	0	0.03	0.1624
GO:0008409	5'-3' exonuclease activity	9	0	0.31	0.16293
GO:0045486	naringenin 3-dioxygenase activity	4	2	0.14	0.16296
GO:0018489	vanillate monooxygenase activity	2	0	0.07	0.16479
GO:0004109	coproporphyrinogen oxidase activity	3	0	0.1	0.16487
GO:0005525	GTP binding	251	8	8.63	0.16539
GO:0032561	guanyl ribonucleotide binding	251	8	8.63	0.16539
GO:0015238	drug transmembrane transporter activity	75	3	2.58	0.1659
GO:0009039	urease activity	1	0	0.03	0.1673
GO:0009001	serine O-acetyltransferase activity	3	0	0.1	0.16827
GO:0016412	serine O-acyltransferase activity	3	0	0.1	0.16827
GO:0019201	nucleotide kinase activity	17	0	0.58	0.16896
GO:0004017	adenylate kinase activity	6	0	0.21	0.16931
GO:0005516	calmodulin binding	52	6	1.79	0.16953
GO:0004170	dUTP diphosphatase activity	1	0	0.03	0.16966
GO:0009055	electron carrier activity	149	6	5.12	0.16968
GO:0050313	sulfur dioxygenase activity	2	0	0.07	0.17019
GO:0043178	alcohol binding	23	1	0.79	0.1702
GO:0042887	amide transmembrane transporter activity	7	1	0.24	0.17031
GO:0047134	protein-disulfide reductase activity	2	0	0.07	0.1723
GO:0000822	inositol hexakisphosphate binding	5	0	0.17	0.17268
GO:0070568	guanylyltransferase activity	9	0	0.31	0.17452
GO:0004329	formate-tetrahydrofolate ligase activity	1	0	0.03	0.17462
GO:0052834	inositol monophosphate phosphatase activity	6	0	0.21	0.17519
GO:0071991	phytochelatin transporter activity	1	0	0.03	0.17714
GO:0071992	phytochelatin transmembrane transporter activity	1	0	0.03	0.17714
GO:0042947	glucoside transmembrane transporter activity	1	0	0.03	0.17714
GO:1902417	(+)-abscisic acid D-glucopyranosyl ester transmembrane transporter activity	1	0	0.03	0.17714
GO:0004683	calmodulin-dependent protein kinase activity	35	4	1.2	0.17873
GO:0046915	transition metal ion transmembrane transporter activity	44	4	1.51	0.17886
GO:0008808	cardiolipin synthase activity	1	0	0.03	0.1792
GO:0030572	phosphatidyltransferase activity	1	0	0.03	0.1792
GO:0000403	Y-form DNA binding	1	0	0.03	0.17925
GO:0000404	heteroduplex DNA loop binding	1	0	0.03	0.17925
GO:0000406	double-strand/single-strand DNA junction binding	1	0	0.03	0.17925
GO:0016538	cyclin-dependent protein serine/threonine kinase regulator activity	14	0	0.48	0.18008
GO:0050347	trans-octaprenyltranstransferase activity	1	0	0.03	0.18048
GO:0052923	all-trans-nonaprenyl-diphosphate synthase (geranyl-diphosphate specific) activity	1	0	0.03	0.18048
GO:0004852	uroporphyrinogen-III synthase activity	6	0	0.21	0.18064
GO:0004030	aldehyde dehydrogenase [NAD(P)+] activity	7	2	0.24	0.18095
GO:0016863	intramolecular oxidoreductase activity, transposing C=C bonds	4	0	0.14	0.18193
GO:0004198	calcium-dependent cysteine-type endopeptidase activity	5	0	0.17	0.18197
GO:0004737	pyruvate decarboxylase activity	1	0	0.03	0.18221
GO:0016887	ATPase activity	531	27	18.26	0.18262
GO:0003905	alkylbase DNA N-glycosylase activity	4	0	0.14	0.18271
GO:0003968	RNA-directed 5'-3' RNA polymerase activity	1	0	0.03	0.18319
GO:0004827	proline-tRNA ligase activity	3	0	0.1	0.18329
GO:0052747	sinapyl alcohol dehydrogenase activity	7	0	0.24	0.18402
GO:0008373	sialyltransferase activity	3	0	0.1	0.18495
GO:0004479	methionyl-tRNA formyltransferase activity	1	0	0.03	0.18503
GO:0050664	oxidoreductase activity, acting on NAD(P)H, oxygen as acceptor	12	1	0.41	0.18602
GO:0008470	isovaleryl-CoA dehydrogenase activity	2	0	0.07	0.18618
GO:0004535	poly(A)-specific ribonuclease activity	4	0	0.14	0.18621
GO:0016868	intramolecular transferase activity, phosphotransferases	17	1	0.58	0.18654
GO:0004032	alditol:NADP+ 1-oxidoreductase activity	1	0	0.03	0.18725
GO:0003876	AMP deaminase activity	4	1	0.14	0.18767
GO:0047623	adenosine-phosphate deaminase activity	4	1	0.14	0.18767
GO:0004018	N6-(1,2-dicarboxyethyl)AMP AMP-lyase (fumarate-forming) activity	2	0	0.07	0.18785
GO:0070626	(S)-2-(5-amino-1-(5-phospho-D-ribosyl)imidazole-4-carboxamido)succinate AMP-lyase (fumarate-forming) activity	2	0	0.07	0.18785
GO:0004366	glycerol-3-phosphate O-acyltransferase activity	2	0	0.07	0.18863
GO:0004829	threonine-tRNA ligase activity	8	2	0.28	0.18978
GO:0008928	mannose-1-phosphate guanylyltransferase (GDP) activity	3	0	0.1	0.18996
GO:0048529	magnesium-protoporphyrin IX monomethyl ester (oxidative) cyclase activity	2	0	0.07	0.19018
GO:0004518	nuclease activity	140	1	4.81	0.19114
GO:0050270	S-adenosylhomocysteine deaminase activity	1	0	0.03	0.19169
GO:0046539	histamine N-methyltransferase activity	2	0	0.07	0.19266
GO:0016895	exodeoxyribonuclease activity, producing 5'-phosphomonoesters	12	1	0.41	0.19267
GO:0004529	exodeoxyribonuclease activity	12	1	0.41	0.19267
GO:0098599	palmitoyl hydrolase activity	6	1	0.21	0.19399
GO:0016411	acylglycerol O-acyltransferase activity	19	0	0.65	0.1942
GO:0003868	4-hydroxyphenylpyruvate dioxygenase activity	1	0	0.03	0.19424
GO:0000988	transcription factor activity, protein binding	68	2	2.34	0.19491
GO:0016627	oxidoreductase activity, acting on the CH-CH group of donors	156	4	5.36	0.19539
GO:0016628	oxidoreductase activity, acting on the CH-CH group of donors, NAD or NADP as acceptor	84	4	2.89	0.1957
GO:0004024	alcohol dehydrogenase activity, zinc-dependent	1	0	0.03	0.19578
GO:0033907	beta-D-fucosidase activity	1	0	0.03	0.19738
GO:0080083	beta-gentiobiose beta-glucosidase activity	1	0	0.03	0.19738
GO:0080079	cellobiose glucosidase activity	1	0	0.03	0.19738
GO:0008942	nitrite reductase [NAD(P)H] activity	1	0	0.03	0.19833
GO:0043566	DNA binding	71	1	2.44	0.19975
GO:0009824	AMP dimethylallyltransferase activity	1	0	0.03	0.20018
GO:0016670	oxidoreductase activity, acting on a sulfur group of donors, oxygen as acceptor	4	0	0.14	0.20023
GO:0070042	rRNA (uridine-N3-)-methyltransferase activity	4	0	0.14	0.20111
GO:0004822	isoleucine-tRNA ligase activity	3	0	0.1	0.20114
GO:0051750	delta3,5-delta2,4-dienoyl-CoA isomerase activity	1	0	0.03	0.20247
GO:0000030	mannosyltransferase activity	14	0	0.48	0.20322
GO:0051499	D-aminoacyl-tRNA deacylase activity	2	0	0.07	0.20375
GO:0033843	xyloglucan 6-xylosyltransferase activity	1	0	0.03	0.20396
GO:0070696	transmembrane receptor protein serine/threonine kinase binding	1	0	0.03	0.20405
GO:0050275	scopoletin glucosyltransferase activity	1	0	0.03	0.20434
GO:0004610	phosphoacetylglucosamine mutase activity	1	0	0.03	0.20488
GO:0004748	ribonucleoside-diphosphate reductase activity, thioredoxin disulfide as acceptor	5	0	0.17	0.20523
GO:0016728	oxidoreductase activity, acting on CH or CH2 groups, disulfide as acceptor	5	0	0.17	0.20523
GO:0019001	guanyl nucleotide binding	255	8	8.77	0.20529
GO:0016756	glutathione gamma-glutamylcysteinyltransferase activity	5	1	0.17	0.20534
GO:0004475	mannose-1-phosphate guanylyltransferase activity	2	0	0.07	0.20573
GO:0042781	3'-tRNA processing endoribonuclease activity	3	0	0.1	0.2066
GO:1901474	azole transmembrane transporter activity	1	0	0.03	0.20701
GO:0000064	L-ornithine transmembrane transporter activity	1	0	0.03	0.20701
GO:0045118	azole transporter activity	1	0	0.03	0.20701
GO:0005290	L-histidine transmembrane transporter activity	1	0	0.03	0.20701
GO:0016209	antioxidant activity	142	10	4.88	0.20895
GO:0016881	acid-amino acid ligase activity	14	0	0.48	0.20903
GO:0004551	nucleotide diphosphatase activity	3	0	0.1	0.20964
GO:0004012	phospholipid-translocating ATPase activity	11	1	0.38	0.20973
GO:0045131	pre-mRNA branch point binding	1	0	0.03	0.20975
GO:0008444	CDP-diacylglycerol-glycerol-3-phosphate 3-phosphatidyltransferase activity	2	0	0.07	0.20987
GO:0017025	TBP-class protein binding	10	0	0.34	0.21168
GO:0038023	signaling receptor activity	43	1	1.48	0.21195
GO:0090484	drug transporter activity	76	3	2.61	0.21216
GO:0047884	FAD diphosphatase activity	1	0	0.03	0.2137
GO:0004471	malate dehydrogenase (decarboxylating) (NAD+) activity	12	0	0.41	0.21389
GO:0008690	3-deoxy-manno-octulosonate cytidylyltransferase activity	1	0	0.03	0.21395
GO:0005451	monovalent cation:proton antiporter activity	10	2	0.34	0.21404
GO:0008974	phosphoribulokinase activity	3	0	0.1	0.21418
GO:0048037	cofactor binding	453	17	15.58	0.21738
GO:0019187	beta-1,4-mannosyltransferase activity	1	0	0.03	0.21791
GO:0051753	mannan synthase activity	1	0	0.03	0.21791
GO:0047681	aryl-alcohol dehydrogenase (NADP+) activity	1	0	0.03	0.21821
GO:0009673	low-affinity phosphate transmembrane transporter activity	1	0	0.03	0.22029
GO:0004866	endopeptidase inhibitor activity	10	0	0.34	0.22056
GO:0061135	endopeptidase regulator activity	10	0	0.34	0.22056
GO:0004592	pantoate-beta-alanine ligase activity	1	0	0.03	0.22059
GO:0034483	heparan sulfate sulfotransferase activity	1	0	0.03	0.22095
GO:0017095	heparan sulfate 6-O-sulfotransferase activity	1	0	0.03	0.22095
GO:0022889	serine transmembrane transporter activity	2	0	0.07	0.22213
GO:0015194	L-serine transmembrane transporter activity	2	0	0.07	0.22213
GO:0004559	alpha-mannosidase activity	9	0	0.31	0.22286
GO:0045158	electron transporter, transferring electrons within cytochrome b6/f complex of photosystem II activity	7	0	0.24	0.22323
GO:0004620	phospholipase activity	33	2	1.13	0.22341
GO:0050105	L-gulonolactone oxidase activity	1	0	0.03	0.22551
GO:0016702	oxidoreductase activity, acting on single donors with incorporation of molecular oxygen, incorporation of two atoms of oxygen	38	5	1.31	0.22626
GO:0008915	lipid-A-disaccharide synthase activity	1	0	0.03	0.22628
GO:0004427	inorganic diphosphatase activity	10	0	0.34	0.22664
GO:0016711	flavonoid 3'-monooxygenase activity	1	0	0.03	0.22726
GO:0045550	geranylgeranyl reductase activity	2	0	0.07	0.22737
GO:0004719	protein-L-isoaspartate (D-aspartate) O-methyltransferase activity	1	0	0.03	0.22804
GO:0005313	L-glutamate transmembrane transporter activity	2	1	0.07	0.22957
GO:0015172	acidic amino acid transmembrane transporter activity	2	1	0.07	0.22957
GO:0004654	polyribonucleotide nucleotidyltransferase activity	1	0	0.03	0.22966
GO:0016435	rRNA (guanine) methyltransferase activity	2	0	0.07	0.23024
GO:0004073	aspartate-semialdehyde dehydrogenase activity	1	0	0.03	0.2307
GO:0003942	N-acetyl-gamma-glutamyl-phosphate reductase activity	1	0	0.03	0.2307
GO:0004714	transmembrane receptor protein tyrosine kinase activity	1	0	0.03	0.2317
GO:0030332	cyclin binding	1	0	0.03	0.23275
GO:0015385	sodium:proton antiporter activity	4	0	0.14	0.23313
GO:0022836	gated channel activity	52	2	1.79	0.23402
GO:0008934	inositol monophosphate 1-phosphatase activity	5	0	0.17	0.23422
GO:0016799	hydrolase activity, hydrolyzing N-glycosyl compounds	23	2	0.79	0.23452
GO:0015171	amino acid transmembrane transporter activity	76	10	2.61	0.23523
GO:0008830	dTDP-4-dehydrorhamnose 3,5-epimerase activity	1	0	0.03	0.2364
GO:0008831	dTDP-4-dehydrorhamnose reductase activity	1	0	0.03	0.2364
GO:1901265	nucleoside phosphate binding	2698	101	92.76	0.23694
GO:0003896	DNA primase activity	1	0	0.03	0.23805
GO:0019905	syntaxin binding	7	0	0.24	0.23821
GO:0008792	arginine decarboxylase activity	2	0	0.07	0.239
GO:0031490	chromatin DNA binding	15	1	0.52	0.23945
GO:0044212	transcription regulatory region DNA binding	55	2	1.89	0.24013
GO:0017076	purine nucleotide binding	1744	68	59.96	0.24025
GO:0005452	inorganic anion exchanger activity	8	1	0.28	0.24097
GO:0019781	NEDD8 activating enzyme activity	2	0	0.07	0.2412
GO:0003883	CTP synthase activity	5	2	0.17	0.24151
GO:0016703	oxidoreductase activity, acting on single donors with incorporation of molecular oxygen, incorporation of one atom of oxygen (internal monooxygenases or internal mixed function oxidases)	4	0	0.14	0.24156
GO:0010277	chlorophyllide a oxygenase [overall] activity	4	0	0.14	0.24156
GO:0047924	geraniol dehydrogenase activity	1	0	0.03	0.24241
GO:0004831	tyrosine-tRNA ligase activity	3	0	0.1	0.2425
GO:0004451	isocitrate lyase activity	3	0	0.1	0.24507
GO:0004564	beta-fructofuranosidase activity	14	2	0.48	0.24547
GO:0008234	cysteine-type peptidase activity	71	1	2.44	0.24563
GO:0047100	glyceraldehyde-3-phosphate dehydrogenase (NADP+) (phosphorylating) activity	1	0	0.03	0.24638
GO:0001105	RNA polymerase II transcription coactivator activity	1	0	0.03	0.24654
GO:0001190	transcriptional activator activity, RNA polymerase II transcription factor binding	1	0	0.03	0.24654
GO:0001128	RNA polymerase II transcription coactivator activity involved in preinitiation complex assembly	1	0	0.03	0.24654
GO:0004809	tRNA (guanine-N2-)-methyltransferase activity	6	0	0.21	0.24692
GO:0004616	phosphogluconate dehydrogenase (decarboxylating) activity	7	0	0.24	0.24706
GO:0051500	D-tyrosyl-tRNA(Tyr) deacylase activity	1	0	0.03	0.2472
GO:0016211	ammonia ligase activity	4	0	0.14	0.24768
GO:0016880	acid-ammonia (or amide) ligase activity	4	0	0.14	0.24768
GO:0004356	glutamate-ammonia ligase activity	4	0	0.14	0.24768
GO:0051880	G-quadruplex DNA binding	1	0	0.03	0.24796
GO:0043047	single-stranded telomeric DNA binding	1	0	0.03	0.24796
GO:0047760	butyrate-CoA ligase activity	3	1	0.1	0.24816
GO:0019144	ADP-sugar diphosphatase activity	1	0	0.03	0.25266
GO:0080041	ADP-ribose pyrophosphohydrolase activity	1	0	0.03	0.25266
GO:0080042	ADP-glucose pyrophosphohydrolase activity	1	0	0.03	0.25266
GO:0016903	oxidoreductase activity, acting on the aldehyde or oxo group of donors	112	9	3.85	0.25341
GO:0008835	diaminohydroxyphosphoribosylaminopyrimidine deaminase activity	1	0	0.03	0.25405
GO:0008703	5-amino-6-(5-phosphoribosylamino)uracil reductase activity	1	0	0.03	0.25405
GO:0015093	ferrous iron transmembrane transporter activity	1	0	0.03	0.255
GO:0031386	protein tag	8	0	0.28	0.25516
GO:0031683	G-protein beta/gamma-subunit complex binding	6	0	0.21	0.25523
GO:0047453	ATP-dependent NAD(P)H-hydrate dehydratase activity	1	0	0.03	0.25533
GO:0052855	ADP-dependent NAD(P)H-hydrate dehydratase activity	1	0	0.03	0.25533
GO:0019825	oxygen binding	2	1	0.07	0.25533
GO:0005545	1-phosphatidylinositol binding	3	0	0.1	0.25536
GO:0043424	protein histidine kinase binding	17	2	0.58	0.25706
GO:0004353	glutamate dehydrogenase [NAD(P)+] activity	2	0	0.07	0.25731
GO:0000099	sulfur amino acid transmembrane transporter activity	1	0	0.03	0.25763
GO:0015184	L-cystine transmembrane transporter activity	1	0	0.03	0.25763
GO:0072349	modified amino acid transmembrane transporter activity	1	0	0.03	0.25763
GO:0033293	monocarboxylic acid binding	15	1	0.52	0.25783
GO:0051766	inositol trisphosphate kinase activity	6	0	0.21	0.25867
GO:0004169	dolichyl-phosphate-mannose-protein mannosyltransferase activity	2	0	0.07	0.2601
GO:0001076	transcription factor activity, RNA polymerase II transcription factor binding	18	0	0.62	0.2608
GO:0008905	mannose-phosphate guanylyltransferase activity	4	0	0.14	0.26254
GO:0004332	fructose-bisphosphate aldolase activity	8	0	0.28	0.26366
GO:0008685	2-C-methyl-D-erythritol 2,4-cyclodiphosphate synthase activity	1	0	0.03	0.26369
GO:0016849	phosphorus-oxygen lyase activity	1	0	0.03	0.26369
GO:0019207	kinase regulator activity	27	0	0.93	0.26388
GO:0004540	ribonuclease activity	52	0	1.79	0.26407
GO:0000976	transcription regulatory region sequence-specific DNA binding	37	1	1.27	0.26477
GO:0005385	zinc ion transmembrane transporter activity	20	2	0.69	0.26491
GO:0016832	aldehyde-lyase activity	15	1	0.52	0.26605
GO:0008474	palmitoyl-(protein) hydrolase activity	5	0	0.17	0.26616
GO:0010013	N-1-naphthylphthalamic acid binding	1	0	0.03	0.26707
GO:0004360	glutamine-fructose-6-phosphate transaminase (isomerizing) activity	3	0	0.1	0.26708
GO:0070548	L-glutamine aminotransferase activity	3	0	0.1	0.26708
GO:0061503	tRNA threonylcarbamoyladenosine dehydratase	1	0	0.03	0.26718
GO:0019139	cytokinin dehydrogenase activity	6	1	0.21	0.26732
GO:0016796	exonuclease activity, active with either ribo- or deoxyribonucleic acids and producing 5'-phosphomonoesters	25	1	0.86	0.26933
GO:0050515	4-(cytidine 5'-diphospho)-2-C-methyl-D-erythritol kinase activity	1	0	0.03	0.26937
GO:0016407	acetyltransferase activity	97	5	3.34	0.26957
GO:0004516	nicotinate phosphoribosyltransferase activity	1	0	0.03	0.26972
GO:0070039	rRNA (guanosine-2'-O-)-methyltransferase activity	1	0	0.03	0.26978
GO:0000166	nucleotide binding	2698	101	92.76	0.27021
GO:0004639	phosphoribosylaminoimidazolesuccinocarboxamide synthase activity	1	0	0.03	0.27036
GO:0004702	signal transducer, downstream of receptor, with serine/threonine kinase activity	51	2	1.75	0.27128
GO:0005057	signal transducer activity, downstream of receptor	51	2	1.75	0.27128
GO:0046820	4-amino-4-deoxychorismate synthase activity	1	0	0.03	0.27163
GO:0003848	2-amino-4-hydroxy-6-hydroxymethyldihydropteridine diphosphokinase activity	1	0	0.03	0.27227
GO:0004156	dihydropteroate synthase activity	1	0	0.03	0.27227
GO:0019783	ubiquitin-like protein-specific protease activity	9	0	0.31	0.27313
GO:0004712	protein serine/threonine/tyrosine kinase activity	4	0	0.14	0.2736
GO:0047526	2'-hydroxyisoflavone reductase activity	1	0	0.03	0.27414
GO:0016595	glutamate binding	1	0	0.03	0.27432
GO:0051117	ATPase binding	6	0	0.21	0.27445
GO:0016719	carotene 7,8-desaturase activity	4	0	0.14	0.27471
GO:0005102	receptor binding	3	0	0.1	0.27489
GO:0033612	receptor serine/threonine kinase binding	3	0	0.1	0.27489
GO:0016594	glycine binding	2	0	0.07	0.27583
GO:0004375	glycine dehydrogenase (decarboxylating) activity	2	0	0.07	0.27583
GO:0016642	oxidoreductase activity, acting on the CH-NH2 group of donors, disulfide as acceptor	2	0	0.07	0.27583
GO:0004452	isopentenyl-diphosphate delta-isomerase activity	1	0	0.03	0.27631
GO:0004014	adenosylmethionine decarboxylase activity	7	0	0.24	0.27745
GO:0003677	DNA binding	939	24	32.28	0.27822
GO:0003837	beta-ureidopropionase activity	1	0	0.03	0.27866
GO:0016860	intramolecular oxidoreductase activity	50	1	1.72	0.27928
GO:0016776	phosphotransferase activity, phosphate group as acceptor	21	0	0.72	0.27933
GO:0003684	damaged DNA binding	21	0	0.72	0.27945
GO:0004325	ferrochelatase activity	4	0	0.14	0.28066
GO:0046029	mannitol dehydrogenase activity	9	0	0.31	0.28078
GO:0031320	hexitol dehydrogenase activity	9	0	0.31	0.28078
GO:0016614	oxidoreductase activity, acting on CH-OH group of donors	191	5	6.57	0.28123
GO:0008108	UDP-glucose:hexose-1-phosphate uridylyltransferase activity	1	0	0.03	0.28204
GO:0015491	cation:cation antiporter activity	20	3	0.69	0.28294
GO:0015179	L-amino acid transmembrane transporter activity	16	2	0.55	0.2832
GO:0004767	sphingomyelin phosphodiesterase activity	6	1	0.21	0.28437
GO:0016712	oxidoreductase activity, acting on paired donors, with incorporation or reduction of molecular oxygen, reduced flavin or flavoprotein as one donor, and incorporation of one atom of oxygen	3	1	0.1	0.28514
GO:0070330	aromatase activity	3	1	0.1	0.28514
GO:0052886	9,9'-dicis-carotene:quinone oxidoreductase activity	7	0	0.24	0.28537
GO:0052887	7,9,9'-tricis-neurosporene:quinone oxidoreductase activity	7	0	0.24	0.28537
GO:0004474	malate synthase activity	1	0	0.03	0.2861
GO:0015103	inorganic anion transmembrane transporter activity	53	2	1.82	0.28672
GO:0003697	single-stranded DNA binding	29	0	1	0.28699
GO:0036094	small molecule binding	2803	108	96.37	0.28869
GO:0050692	DBD domain binding	2	0	0.07	0.28904
GO:0004343	glucosamine 6-phosphate N-acetyltransferase activity	1	0	0.03	0.28905
GO:0008477	purine nucleosidase activity	3	1	0.1	0.28924
GO:0030247	polysaccharide binding	50	3	1.72	0.28931
GO:0001871	pattern binding	50	3	1.72	0.28931
GO:0000384	first spliceosomal transesterification activity	1	0	0.03	0.29044
GO:0047724	inosine nucleosidase activity	2	1	0.07	0.29049
GO:0004371	glycerone kinase activity	1	0	0.03	0.2911
GO:0003844	1,4-alpha-glucan branching enzyme activity	4	0	0.14	0.29118
GO:0016616	oxidoreductase activity, acting on the CH-OH group of donors, NAD or NADP as acceptor	145	3	4.99	0.29128
GO:0016818	hydrolase activity, acting on acid anhydrides, in phosphorus-containing anhydrides	838	37	28.81	0.29194
GO:0001012	RNA polymerase II regulatory region DNA binding	22	1	0.76	0.29256
GO:0000977	RNA polymerase II regulatory region sequence-specific DNA binding	22	1	0.76	0.29256
GO:0009976	tocopherol cyclase activity	1	0	0.03	0.29323
GO:0022803	passive transmembrane transporter activity	125	3	4.3	0.29367
GO:0015267	channel activity	125	3	4.3	0.29367
GO:0015297	antiporter activity	107	11	3.68	0.29383
GO:0017118	lipoyltransferase activity	1	0	0.03	0.29396
GO:0050660	flavin adenine dinucleotide binding	98	3	3.37	0.29421
GO:0046943	carboxylic acid transmembrane transporter activity	97	11	3.34	0.29426
GO:0060229	lipase activator activity	2	0	0.07	0.29479
GO:0016004	phospholipase activator activity	2	0	0.07	0.29479
GO:0008094	DNA-dependent ATPase activity	29	0	1	0.29532
GO:0016716	oxidoreductase activity, acting on paired donors, with incorporation or reduction of molecular oxygen, another compound as one donor, and incorporation of one atom of oxygen	1	0	0.03	0.29585
GO:0004503	monophenol monooxygenase activity	1	0	0.03	0.29585
GO:0036263	L-DOPA monooxygenase activity	1	0	0.03	0.29585
GO:0016893	endonuclease activity, active with either ribo- or deoxyribonucleic acids and producing 5'-phosphomonoesters	32	0	1.1	0.2968
GO:0052689	carboxylic ester hydrolase activity	103	1	3.54	0.29757
GO:0016150	translation release factor activity, codon nonspecific	1	0	0.03	0.29788
GO:0019787	ubiquitin-like protein transferase activity	6	0	0.21	0.2981
GO:0016639	oxidoreductase activity, acting on the CH-NH2 group of donors, NAD or NADP as acceptor	11	0	0.38	0.29827
GO:0003743	translation initiation factor activity	71	2	2.44	0.29829
GO:0030580	quinone cofactor methyltransferase activity	2	0	0.07	0.29887
GO:0008425	2-polyprenyl-6-methoxy-1,4-benzoquinone methyltransferase activity	2	0	0.07	0.29887
GO:0010349	L-galactose dehydrogenase activity	1	0	0.03	0.29911
GO:0008429	phosphatidylethanolamine binding	3	0	0.1	0.29981
GO:0008883	glutamyl-tRNA reductase activity	1	0	0.03	0.30022
GO:0008253	5'-nucleotidase activity	4	0	0.14	0.30048
GO:0015440	peptide-transporting ATPase activity	1	0	0.03	0.30083
GO:0036402	proteasome-activating ATPase activity	7	0	0.24	0.3009
GO:0003998	acylphosphatase activity	3	0	0.1	0.3013
GO:0004345	glucose-6-phosphate dehydrogenase activity	4	1	0.14	0.30221
GO:0070401	NADP+ binding	1	0	0.03	0.3025
GO:0030378	serine racemase activity	1	0	0.03	0.30455
GO:0003941	L-serine ammonia-lyase activity	1	0	0.03	0.30455
GO:0008721	D-serine ammonia-lyase activity	1	0	0.03	0.30455
GO:0010427	abscisic acid binding	14	1	0.48	0.30665
GO:0019840	isoprenoid binding	14	1	0.48	0.30665
GO:0005342	organic acid transmembrane transporter activity	99	11	3.4	0.30807
GO:0016841	ammonia-lyase activity	8	1	0.28	0.30865
GO:0016655	oxidoreductase activity, acting on NAD(P)H, quinone or similar compound as acceptor	86	2	2.96	0.30969
GO:0004020	adenylylsulfate kinase activity	2	0	0.07	0.31031
GO:0008519	ammonium transmembrane transporter activity	10	1	0.34	0.31062
GO:0015101	organic cation transmembrane transporter activity	10	1	0.34	0.31062
GO:0042030	ATPase inhibitor activity	1	0	0.03	0.31125
GO:0008963	phospho-N-acetylmuramoyl-pentapeptide-transferase activity	2	0	0.07	0.31325
GO:0004609	phosphatidylserine decarboxylase activity	1	0	0.03	0.31334
GO:0008514	organic anion transmembrane transporter activity	114	12	3.92	0.31395
GO:0047334	diphosphate-fructose-6-phosphate 1-phosphotransferase activity	6	0	0.21	0.31475
GO:0008691	3-hydroxybutyryl-CoA dehydrogenase activity	2	0	0.07	0.31486
GO:0001067	regulatory region nucleic acid binding	57	2	1.96	0.31498
GO:0000975	regulatory region DNA binding	57	2	1.96	0.31498
GO:0004843	thiol-dependent ubiquitin-specific protease activity	8	0	0.28	0.31553
GO:0036381	pyridoxal 5'-phosphate synthase (glutamine hydrolysing) activity	1	0	0.03	0.31562
GO:0004108	citrate (Si)-synthase activity	2	0	0.07	0.31693
GO:0036440	citrate synthase activity	2	0	0.07	0.31693
GO:0030158	protein xylosyltransferase activity	4	0	0.14	0.31694
GO:0004197	cysteine-type endopeptidase activity	36	0	1.24	0.31796
GO:0033765	steroid dehydrogenase activity, acting on the CH-CH group of donors	7	0	0.24	0.31821
GO:0047568	3-oxo-5-beta-steroid 4-dehydrogenase activity	7	0	0.24	0.31821
GO:0008176	tRNA (guanine-N7-)-methyltransferase activity	1	0	0.03	0.31887
GO:0016040	glutamate synthase (NADH) activity	1	0	0.03	0.32085
GO:0019104	DNA N-glycosylase activity	10	0	0.34	0.32097
GO:0042879	aldonate transmembrane transporter activity	5	1	0.17	0.3218
GO:0016836	hydro-lyase activity	65	3	2.23	0.32208
GO:0050616	secologanin synthase activity	3	0	0.1	0.32305
GO:0010313	phytochrome binding	1	0	0.03	0.32336
GO:0051751	alpha-1,4-mannosyltransferase activity	1	0	0.03	0.32336
GO:0047372	acylglycerol lipase activity	3	0	0.1	0.32372
GO:0045309	protein phosphorylated amino acid binding	2	0	0.07	0.32445
GO:0051219	phosphoprotein binding	2	0	0.07	0.32445
GO:0001735	prenylcysteine oxidase activity	1	0	0.03	0.32503
GO:0004367	glycerol-3-phosphate dehydrogenase [NAD+] activity	5	0	0.17	0.32641
GO:0004520	endodeoxyribonuclease activity	25	1	0.86	0.32646
GO:0008195	phosphatidate phosphatase activity	5	0	0.17	0.32656
GO:0016298	lipase activity	56	4	1.93	0.3274
GO:0016985	mannan endo-1,4-beta-mannosidase activity	10	2	0.34	0.32781
GO:0008192	RNA guanylyltransferase activity	5	0	0.17	0.32859
GO:0004042	acetyl-CoA:L-glutamate N-acetyltransferase activity	1	0	0.03	0.32905
GO:0004358	glutamate N-acetyltransferase activity	1	0	0.03	0.32905
GO:0004357	glutamate-cysteine ligase activity	1	0	0.03	0.32931
GO:0030145	manganese ion binding	41	0	1.41	0.3296
GO:0016817	hydrolase activity, acting on acid anhydrides	849	37	29.19	0.33017
GO:0004333	fumarate hydratase activity	1	0	0.03	0.33081
GO:0010329	auxin efflux transmembrane transporter activity	13	1	0.45	0.33142
GO:0015562	efflux transmembrane transporter activity	13	1	0.45	0.33142
GO:0080161	auxin transmembrane transporter activity	13	1	0.45	0.33142
GO:0004637	phosphoribosylamine-glycine ligase activity	1	0	0.03	0.33296
GO:0031418	L-ascorbic acid binding	19	2	0.65	0.33334
GO:0004641	phosphoribosylformylglycinamidine cyclo-ligase activity	2	0	0.07	0.33559
GO:0000234	phosphoethanolamine N-methyltransferase activity	1	0	0.03	0.33618
GO:0016684	oxidoreductase activity, acting on peroxide as acceptor	113	9	3.89	0.33681
GO:0000287	magnesium ion binding	103	6	3.54	0.33787
GO:0008144	drug binding	21	1	0.72	0.33851
GO:0050511	undecaprenyldiphospho-muramoylpentapeptide beta-N-acetylglucosaminyltransferase activity	1	0	0.03	0.33875
GO:0016788	hydrolase activity, acting on ester bonds	682	21	23.45	0.33982
GO:0004181	metallocarboxypeptidase activity	3	0	0.1	0.34078
GO:0005487	nucleocytoplasmic transporter activity	3	0	0.1	0.34116
GO:0008171	O-methyltransferase activity	41	3	1.41	0.34366
GO:0004528	phosphodiesterase I activity	1	0	0.03	0.34398
GO:0019158	mannokinase activity	7	2	0.24	0.34412
GO:0004340	glucokinase activity	7	2	0.24	0.34412
GO:0070402	NADPH binding	2	0	0.07	0.34514
GO:0030604	1-deoxy-D-xylulose-5-phosphate reductoisomerase activity	2	0	0.07	0.34514
GO:0008168	methyltransferase activity	314	7	10.8	0.34631
GO:0003774	motor activity	80	2	2.75	0.3468
GO:0004735	pyrroline-5-carboxylate reductase activity	1	0	0.03	0.34706
GO:0004805	trehalose-phosphatase activity	4	0	0.14	0.34708
GO:0004470	malic enzyme activity	14	0	0.48	0.34873
GO:0015165	pyrimidine nucleotide-sugar transmembrane transporter activity	2	0	0.07	0.3494
GO:0008324	cation transmembrane transporter activity	407	32	13.99	0.35016
GO:0016415	octanoyltransferase activity	3	0	0.1	0.35154
GO:0004081	bis(5'-nucleosyl)-tetraphosphatase (asymmetrical) activity	2	0	0.07	0.35293
GO:0008796	bis(5'-nucleosyl)-tetraphosphatase activity	2	0	0.07	0.35293
GO:0008710	8-amino-7-oxononanoate synthase activity	1	0	0.03	0.35304
GO:0016780	phosphotransferase activity, for other substituted phosphate groups	14	1	0.48	0.35348
GO:0008661	1-deoxy-D-xylulose-5-phosphate synthase activity	5	0	0.17	0.35484
GO:0003849	3-deoxy-7-phosphoheptulonate synthase activity	3	0	0.1	0.35556
GO:0016165	linoleate 13S-lipoxygenase activity	2	1	0.07	0.3556
GO:0004798	thymidylate kinase activity	1	0	0.03	0.35561
GO:0004643	phosphoribosylaminoimidazolecarboxamide formyltransferase activity	1	0	0.03	0.35615
GO:0003937	IMP cyclohydrolase activity	1	0	0.03	0.35615
GO:0008686	3,4-dihydroxy-2-butanone-4-phosphate synthase activity	3	0	0.1	0.35967
GO:0003935	GTP cyclohydrolase II activity	3	0	0.1	0.35967
GO:0009931	calcium-dependent protein serine/threonine kinase activity	30	4	1.03	0.35973
GO:0010857	calcium-dependent protein kinase activity	30	4	1.03	0.35973
GO:0004044	amidophosphoribosyltransferase activity	1	0	0.03	0.36098
GO:0031491	nucleosome binding	17	1	0.58	0.36109
GO:0008442	3-hydroxyisobutyrate dehydrogenase activity	1	0	0.03	0.36132
GO:0004385	guanylate kinase activity	1	0	0.03	0.36146
GO:0004801	sedoheptulose-7-phosphate:D-glyceraldehyde-3-phosphate glyceronetransferase activity	2	0	0.07	0.36147
GO:0050497	transferase activity, transferring alkylthio groups	1	0	0.03	0.36228
GO:0035596	methylthiotransferase activity	1	0	0.03	0.36228
GO:0008080	N-acetyltransferase activity	53	2	1.82	0.36231
GO:0016741	transferase activity, transferring one-carbon groups	329	8	11.31	0.36272
GO:0016157	sucrose synthase activity	12	1	0.41	0.36322
GO:0008863	formate dehydrogenase (NAD+) activity	1	0	0.03	0.36358
GO:0004326	tetrahydrofolylpolyglutamate synthase activity	2	0	0.07	0.36399
GO:0004715	non-membrane spanning protein tyrosine kinase activity	12	1	0.41	0.36439
GO:0022829	wide pore channel activity	1	0	0.03	0.36468
GO:0015288	porin activity	1	0	0.03	0.36468
GO:0019788	NEDD8 transferase activity	5	0	0.17	0.36475
GO:0000247	C-8 sterol isomerase activity	1	0	0.03	0.36495
GO:0047750	cholestenol delta-isomerase activity	1	0	0.03	0.36495
GO:0033549	MAP kinase phosphatase activity	2	0	0.07	0.36545
GO:0004067	asparaginase activity	1	0	0.03	0.36612
GO:0033926	glycopeptide alpha-N-acetylgalactosaminidase activity	7	1	0.24	0.36719
GO:0019166	trans-2-enoyl-CoA reductase (NADPH) activity	2	0	0.07	0.36729
GO:0010487	thermospermine synthase activity	2	1	0.07	0.36969
GO:0051002	ligase activity, forming nitrogen-metal bonds	5	0	0.17	0.37092
GO:0051003	ligase activity, forming nitrogen-metal bonds, forming coordination complexes	5	0	0.17	0.37092
GO:0008017	microtubule binding	61	0	2.1	0.37092
GO:0005315	inorganic phosphate transmembrane transporter activity	12	1	0.41	0.37156
GO:0008124	4-alpha-hydroxytetrahydrobiopterin dehydratase activity	1	0	0.03	0.37164
GO:0004300	enoyl-CoA hydratase activity	4	0	0.14	0.37226
GO:0005350	pyrimidine nucleobase transmembrane transporter activity	2	0	0.07	0.37228
GO:0015210	uracil transmembrane transporter activity	2	0	0.07	0.37228
GO:0009815	1-aminocyclopropane-1-carboxylate oxidase activity	6	0	0.21	0.37325
GO:0003921	GMP synthase activity	3	0	0.1	0.37418
GO:0003922	GMP synthase (glutamine-hydrolyzing) activity	3	0	0.1	0.37418
GO:0008670	2,4-dienoyl-CoA reductase (NADPH) activity	1	0	0.03	0.37435
GO:0008886	glyceraldehyde-3-phosphate dehydrogenase (NADP+) (non-phosphorylating) activity	1	0	0.03	0.37511
GO:0050518	2-C-methyl-D-erythritol 4-phosphate cytidylyltransferase activity	1	0	0.03	0.37595
GO:0031543	peptidyl-proline dioxygenase activity	1	0	0.03	0.37623
GO:0031545	peptidyl-proline 4-dioxygenase activity	1	0	0.03	0.37623
GO:0019798	procollagen-proline dioxygenase activity	1	0	0.03	0.37623
GO:0004656	procollagen-proline 4-dioxygenase activity	1	0	0.03	0.37623
GO:0042802	identical protein binding	80	3	2.75	0.3769
GO:0019900	kinase binding	33	2	1.13	0.3776
GO:0033759	flavone synthase activity	2	1	0.07	0.37843
GO:0003729	mRNA binding	47	2	1.62	0.37982
GO:0005093	Rab GDP-dissociation inhibitor activity	3	1	0.1	0.38051
GO:0008650	rRNA (uridine-2'-O-)-methyltransferase activity	2	0	0.07	0.38116
GO:0017150	tRNA dihydrouridine synthase activity	4	0	0.14	0.38126
GO:0051731	polynucleotide 5'-hydroxyl-kinase activity	9	1	0.31	0.3831
GO:0004045	aminoacyl-tRNA hydrolase activity	8	0	0.28	0.38337
GO:0001716	L-amino-acid oxidase activity	1	0	0.03	0.38464
GO:0044318	L-aspartate:fumarate oxidoreductase activity	1	0	0.03	0.38464
GO:0015922	aspartate oxidase activity	1	0	0.03	0.38464
GO:0008734	L-aspartate oxidase activity	1	0	0.03	0.38464
GO:0016423	tRNA (guanine) methyltransferase activity	13	0	0.45	0.38469
GO:0047769	arogenate dehydratase activity	2	1	0.07	0.38598
GO:0004664	prephenate dehydratase activity	2	1	0.07	0.38598
GO:0050505	hydroquinone glucosyltransferase activity	1	0	0.03	0.38689
GO:0016410	N-acyltransferase activity	57	3	1.96	0.38699
GO:0008235	metalloexopeptidase activity	15	0	0.52	0.38807
GO:0004573	mannosyl-oligosaccharide glucosidase activity	6	0	0.21	0.3881
GO:0031492	nucleosomal DNA binding	12	1	0.41	0.39002
GO:0015923	mannosidase activity	23	2	0.79	0.39023
GO:0005319	lipid transporter activity	21	2	0.72	0.39076
GO:0001872	(1->3)-beta-D-glucan binding	1	0	0.03	0.39136
GO:0004601	peroxidase activity	112	9	3.85	0.39142
GO:0003977	UDP-N-acetylglucosamine diphosphorylase activity	3	0	0.1	0.39188
GO:0051748	UTP-monosaccharide-1-phosphate uridylyltransferase activity	3	0	0.1	0.39221
GO:0003983	UTP:glucose-1-phosphate uridylyltransferase activity	3	0	0.1	0.39221
GO:0046921	alpha-(1->6)-fucosyltransferase activity	1	0	0.03	0.39242
GO:0016681	oxidoreductase activity, acting on diphenols and related substances as donors, cytochrome as acceptor	14	1	0.48	0.39258
GO:0016661	oxidoreductase activity, acting on other nitrogenous compounds as donors	7	1	0.24	0.39292
GO:0004784	superoxide dismutase activity	17	1	0.58	0.39331
GO:0016721	oxidoreductase activity, acting on superoxide radicals as acceptor	17	1	0.58	0.39331
GO:0004106	chorismate mutase activity	3	1	0.1	0.39336
GO:0003825	alpha,alpha-trehalose-phosphate synthase (UDP-forming) activity	6	0	0.21	0.39358
GO:0010295	(+)-abscisic acid 8'-hydroxylase activity	1	0	0.03	0.39363
GO:0047205	quinate O-hydroxycinnamoyltransferase activity	2	1	0.07	0.3939
GO:0019135	deoxyhypusine monooxygenase activity	1	0	0.03	0.39449
GO:0004022	alcohol dehydrogenase (NAD) activity	4	0	0.14	0.39484
GO:0015120	phosphoglycerate transmembrane transporter activity	4	1	0.14	0.39499
GO:0045551	cinnamyl-alcohol dehydrogenase activity	8	0	0.28	0.39618
GO:0052745	inositol phosphate phosphatase activity	14	0	0.48	0.3977
GO:0004817	cysteine-tRNA ligase activity	1	0	0.03	0.3977
GO:0051777	ent-kaurenoate oxidase activity	1	0	0.03	0.39792
GO:0015930	glutamate synthase activity	5	0	0.17	0.39832
GO:0008967	phosphoglycolate phosphatase activity	2	0	0.07	0.39921
GO:0004164	diphthine synthase activity	2	1	0.07	0.39926
GO:0015140	malate transmembrane transporter activity	12	0	0.41	0.39976
GO:0008028	monocarboxylic acid transmembrane transporter activity	9	2	0.31	0.39999
GO:0004049	anthranilate synthase activity	1	0	0.03	0.40086
GO:0033897	ribonuclease T2 activity	3	0	0.1	0.40091
GO:0009882	blue light photoreceptor activity	4	0	0.14	0.40186
GO:0016886	ligase activity, forming phosphoric ester bonds	11	0	0.38	0.40203
GO:0010285	L,L-diaminopimelate aminotransferase activity	2	0	0.07	0.40389
GO:0016867	intramolecular transferase activity, transferring acyl groups	1	0	0.03	0.40402
GO:0000906	6,7-dimethyl-8-ribityllumazine synthase activity	1	0	0.03	0.40402
GO:0015037	peptide disulfide oxidoreductase activity	4	0	0.14	0.40409
GO:0015038	glutathione disulfide oxidoreductase activity	4	0	0.14	0.40409
GO:0030611	arsenate reductase activity	2	1	0.07	0.40537
GO:1990050	phosphatidic acid transporter activity	1	0	0.03	0.40676
GO:0051786	all-trans-retinol 13,14-reductase activity	2	0	0.07	0.40715
GO:0015604	organic phosphonate transmembrane transporter activity	4	1	0.14	0.41075
GO:0015416	ATPase-coupled organic phosphonate transmembrane transporter activity	4	1	0.14	0.41075
GO:0010420	polyprenyldihydroxybenzoate methyltransferase activity	1	0	0.03	0.41133
GO:0061542	3-demethylubiquinone-n 3-O-methyltransferase activity	1	0	0.03	0.41133
GO:0016833	oxo-acid-lyase activity	8	0	0.28	0.416
GO:0005388	calcium-transporting ATPase activity	12	2	0.41	0.41604
GO:0003995	acyl-CoA dehydrogenase activity	22	0	0.76	0.41728
GO:0008534	oxidized purine nucleobase lesion DNA N-glycosylase activity	2	0	0.07	0.41733
GO:0030599	pectinesterase activity	47	0	1.62	0.41734
GO:0016645	oxidoreductase activity, acting on the CH-NH group of donors	16	1	0.55	0.41853
GO:0004146	dihydrofolate reductase activity	4	0	0.14	0.41899
GO:0004725	protein tyrosine phosphatase activity	29	0	1	0.41921
GO:0008935	1,4-dihydroxy-2-naphthoyl-CoA synthase activity	1	0	0.03	0.41943
GO:0005375	copper ion transmembrane transporter activity	11	2	0.38	0.41965
GO:0004072	aspartate kinase activity	2	0	0.07	0.42044
GO:0010485	H4 histone acetyltransferase activity	3	0	0.1	0.42163
GO:0050017	L-3-cyanoalanine synthase activity	1	0	0.03	0.4217
GO:0070180	large ribosomal subunit rRNA binding	13	1	0.45	0.42222
GO:0004807	triose-phosphate isomerase activity	4	0	0.14	0.42251
GO:0017057	6-phosphogluconolactonase activity	3	0	0.1	0.42282
GO:0016646	oxidoreductase activity, acting on the CH-NH group of donors, NAD or NADP as acceptor	9	0	0.31	0.42288
GO:0044822	RNA binding	58	2	1.99	0.42335
GO:0008198	ferrous iron binding	4	0	0.14	0.42369
GO:0042803	protein homodimerization activity	43	3	1.48	0.42496
GO:0008509	anion transmembrane transporter activity	191	15	6.57	0.42539
GO:0016273	arginine N-methyltransferase activity	6	0	0.21	0.42555
GO:0016274	protein-arginine N-methyltransferase activity	6	0	0.21	0.42555
GO:0004629	phospholipase C activity	1	0	0.03	0.42575
GO:0004435	phosphatidylinositol phospholipase C activity	1	0	0.03	0.42575
GO:0010210	IAA-Phe conjugate hydrolase activity	1	0	0.03	0.42597
GO:0010211	IAA-Leu conjugate hydrolase activity	1	0	0.03	0.42597
GO:0016787	hydrolase activity	3090	134	106.24	0.42609
GO:0004820	glycine-tRNA ligase activity	2	0	0.07	0.42689
GO:0022832	voltage-gated channel activity	48	1	1.65	0.42774
GO:0005244	voltage-gated ion channel activity	48	1	1.65	0.42774
GO:0022838	substrate-specific channel activity	111	3	3.82	0.43
GO:0052592	oxidoreductase activity, acting on CH or CH2 groups, with an iron-sulfur protein as acceptor	3	0	0.1	0.43139
GO:0003853	2-methylacyl-CoA dehydrogenase activity	1	0	0.03	0.43151
GO:0019904	protein domain specific binding	11	0	0.38	0.43228
GO:0004781	sulfate adenylyltransferase (ATP) activity	2	0	0.07	0.43286
GO:0004779	sulfate adenylyltransferase activity	2	0	0.07	0.43286
GO:0042973	glucan endo-1,3-beta-D-glucosidase activity	9	0	0.31	0.43367
GO:0046522	S-methyl-5-thioribose kinase activity	2	0	0.07	0.4338
GO:0034450	ubiquitin-ubiquitin ligase activity	2	0	0.07	0.43422
GO:0004567	beta-mannosidase activity	12	2	0.41	0.43535
GO:0008455	alpha-1,6-mannosylglycoprotein 2-beta-N-acetylglucosaminyltransferase activity	1	0	0.03	0.43627
GO:0004738	pyruvate dehydrogenase activity	8	0	0.28	0.43647
GO:0004739	pyruvate dehydrogenase (acetyl-transferring) activity	8	0	0.28	0.43647
GO:0051377	mannose-ethanolamine phosphotransferase activity	1	0	0.03	0.43686
GO:0015086	cadmium ion transmembrane transporter activity	1	0	0.03	0.43694
GO:0042562	hormone binding	16	1	0.55	0.43712
GO:0008536	Ran GTPase binding	21	0	0.72	0.43864
GO:0004591	oxoglutarate dehydrogenase (succinyl-transferring) activity	4	1	0.14	0.43892
GO:0003913	DNA photolyase activity	3	0	0.1	0.44015
GO:0036455	iron-sulfur transferase activity	1	0	0.03	0.44045
GO:0043168	anion binding	2132	85	73.3	0.44052
GO:0004021	L-alanine:2-oxoglutarate aminotransferase activity	1	0	0.03	0.44142
GO:0047635	alanine-oxo-acid transaminase activity	1	0	0.03	0.44142
GO:0015266	protein channel activity	11	0	0.38	0.44192
GO:0051721	protein phosphatase 2A binding	3	0	0.1	0.44387
GO:0008252	nucleotidase activity	13	0	0.45	0.44624
GO:0004623	phospholipase A2 activity	4	0	0.14	0.44735
GO:0016972	thiol oxidase activity	3	0	0.1	0.44959
GO:0046408	chlorophyll synthetase activity	1	0	0.03	0.44983
GO:0046910	pectinesterase inhibitor activity	36	0	1.24	0.45136
GO:0016851	magnesium chelatase activity	4	0	0.14	0.45232
GO:0004365	glyceraldehyde-3-phosphate dehydrogenase (NAD+) (phosphorylating) activity	7	1	0.24	0.45266
GO:0015631	tubulin binding	68	0	2.34	0.4548
GO:0008453	alanine-glyoxylate transaminase activity	6	0	0.21	0.45606
GO:0004602	glutathione peroxidase activity	17	1	0.58	0.45701
GO:0050355	triphosphatase activity	1	0	0.03	0.45738
GO:0003879	ATP phosphoribosyltransferase activity	1	0	0.03	0.45761
GO:0033853	aspartate-prephenate aminotransferase activity	1	0	0.03	0.45776
GO:0033854	glutamate-prephenate aminotransferase activity	1	0	0.03	0.45776
GO:0004527	exonuclease activity	53	1	1.82	0.45806
GO:0047429	nucleoside-triphosphate diphosphatase activity	2	0	0.07	0.45807
GO:0030267	glyoxylate reductase (NADP) activity	5	0	0.17	0.45859
GO:0015301	anion:anion antiporter activity	18	2	0.62	0.45951
GO:0030170	pyridoxal phosphate binding	106	5	3.64	0.45954
GO:0010328	auxin influx transmembrane transporter activity	3	0	0.1	0.45973
GO:0008239	dipeptidyl-peptidase activity	2	0	0.07	0.4608
GO:0016726	oxidoreductase activity, acting on CH or CH2 groups, NAD or NADP as acceptor	9	0	0.31	0.46132
GO:0010242	oxygen evolving activity	2	0	0.07	0.46183
GO:0050613	delta14-sterol reductase activity	2	0	0.07	0.46231
GO:0043621	protein self-association	8	0	0.28	0.46438
GO:0046564	oxalate decarboxylase activity	24	0	0.83	0.46487
GO:0001071	nucleic acid binding transcription factor activity	284	9	9.76	0.46491
GO:0003700	transcription factor activity, sequence-specific DNA binding	284	9	9.76	0.46491
GO:0004055	argininosuccinate synthase activity	1	0	0.03	0.46674
GO:0016853	isomerase activity	271	10	9.32	0.4692
GO:0060590	ATPase regulator activity	7	0	0.24	0.47031
GO:0003980	UDP-glucose:glycoprotein glucosyltransferase activity	1	0	0.03	0.47064
GO:0016731	oxidoreductase activity, acting on iron-sulfur proteins as donors, NAD or NADP as acceptor	3	0	0.1	0.47091
GO:0004324	ferredoxin-NADP+ reductase activity	3	0	0.1	0.47091
GO:0017128	phospholipid scramblase activity	1	0	0.03	0.47202
GO:0004069	L-aspartate:2-oxoglutarate aminotransferase activity	6	0	0.21	0.47306
GO:0080130	L-phenylalanine:2-oxoglutarate aminotransferase activity	6	0	0.21	0.47306
GO:0070546	L-phenylalanine aminotransferase activity	6	0	0.21	0.47306
GO:0070011	peptidase activity, acting on L-amino acid peptides	466	12	16.02	0.47399
GO:0003910	DNA ligase (ATP) activity	9	0	0.31	0.47452
GO:0003909	DNA ligase activity	9	0	0.31	0.47452
GO:0003856	3-dehydroquinate synthase activity	3	0	0.1	0.47476
GO:0009678	hydrogen-translocating pyrophosphatase activity	5	0	0.17	0.47619
GO:0008137	NADH dehydrogenase (ubiquinone) activity	69	1	2.37	0.47641
GO:0016630	protochlorophyllide reductase activity	6	0	0.21	0.47779
GO:0050136	NADH dehydrogenase (quinone) activity	76	1	2.61	0.47801
GO:0008948	oxaloacetate decarboxylase activity	2	0	0.07	0.4786
GO:0003777	microtubule motor activity	62	0	2.13	0.47877
GO:0015367	oxoglutarate:malate antiporter activity	1	0	0.03	0.47916
GO:0030234	enzyme regulator activity	210	5	7.22	0.47941
GO:0019706	protein-cysteine S-palmitoyltransferase activity	11	0	0.38	0.48053
GO:0019707	protein-cysteine S-acyltransferase activity	11	0	0.38	0.48053
GO:0016409	palmitoyltransferase activity	11	0	0.38	0.48053
GO:0016682	oxidoreductase activity, acting on diphenols and related substances as donors, oxygen as acceptor	27	2	0.93	0.48156
GO:0032135	DNA insertion or deletion binding	2	0	0.07	0.48209
GO:0032137	guanine/thymine mispair binding	2	0	0.07	0.48209
GO:0032138	single base insertion or deletion binding	2	0	0.07	0.48209
GO:0008641	small protein activating enzyme activity	17	0	0.58	0.48388
GO:0008821	crossover junction endodeoxyribonuclease activity	1	0	0.03	0.4841
GO:0004047	aminomethyltransferase activity	3	0	0.1	0.48508
GO:0004046	aminoacylase activity	2	0	0.07	0.4857
GO:0016656	monodehydroascorbate reductase (NADH) activity	4	1	0.14	0.48674
GO:0000900	translation repressor activity, nucleic acid binding	1	0	0.03	0.48719
GO:0045182	translation regulator activity	1	0	0.03	0.48719
GO:0030371	translation repressor activity	1	0	0.03	0.48719
GO:0090079	translation regulator activity, nucleic acid binding	1	0	0.03	0.48719
GO:0046406	magnesium protoporphyrin IX methyltransferase activity	1	0	0.03	0.48866
GO:0005310	dicarboxylic acid transmembrane transporter activity	14	1	0.48	0.48945
GO:0042623	ATPase activity, coupled	417	19	14.34	0.48964
GO:0035242	protein-arginine omega-N asymmetric methyltransferase activity	5	0	0.17	0.49069
GO:0008469	histone-arginine N-methyltransferase activity	5	0	0.17	0.49069
GO:0015203	polyamine transmembrane transporter activity	6	1	0.21	0.4919
GO:0050590	desacetoxyvindoline 4-hydroxylase activity	1	0	0.03	0.49301
GO:0045549	9-cis-epoxycarotenoid dioxygenase activity	1	0	0.03	0.49317
GO:0010436	carotenoid dioxygenase activity	1	0	0.03	0.49317
GO:0016641	oxidoreductase activity, acting on the CH-NH2 group of donors, oxygen as acceptor	15	0	0.52	0.49427
GO:0008824	cyanate hydratase activity	1	0	0.03	0.49534
GO:0003973	(S)-2-hydroxy-acid oxidase activity	5	0	0.17	0.49556
GO:0019789	SUMO transferase activity	1	0	0.03	0.49612
GO:0051192	prosthetic group binding	1	0	0.03	0.49659
GO:0044620	ACP phosphopantetheine attachment site binding	1	0	0.03	0.49659
GO:0000036	ACP phosphopantetheine attachment site binding involved in fatty acid biosynthetic process	1	0	0.03	0.49659
GO:0003827	alpha-1,3-mannosylglycoprotein 2-beta-N-acetylglucosaminyltransferase activity	1	0	0.03	0.49737
GO:0016262	protein N-acetylglucosaminyltransferase activity	1	0	0.03	0.49737
GO:0015085	calcium ion transmembrane transporter activity	23	3	0.79	0.49746
GO:0036361	racemase activity, acting on amino acids and derivatives	4	0	0.14	0.49773
GO:0003863	3-methyl-2-oxobutanoate dehydrogenase (2-methylpropanoyl-transferring) activity	1	0	0.03	0.49791
GO:0051741	2-methyl-6-phytyl-1,4-benzoquinone methyltransferase activity	2	0	0.07	0.49799
GO:0015036	disulfide oxidoreductase activity	70	0	2.41	0.49862
GO:0043225	ATPase-coupled anion transmembrane transporter activity	8	1	0.28	0.49876
GO:0000981	RNA polymerase II transcription factor activity, sequence-specific DNA binding	38	0	1.31	0.4999
GO:0016905	myosin heavy chain kinase activity	1	0	0.03	0.50228
GO:0004686	elongation factor-2 kinase activity	1	0	0.03	0.50408
GO:0047262	polygalacturonate 4-alpha-galacturonosyltransferase activity	13	0	0.45	0.50416
GO:0048040	UDP-glucuronate decarboxylase activity	3	1	0.1	0.50443
GO:0008441	3'(2'),5'-bisphosphate nucleotidase activity	6	0	0.21	0.50558
GO:0052866	phosphatidylinositol phosphate phosphatase activity	8	0	0.28	0.50722
GO:0004352	glutamate dehydrogenase (NAD+) activity	1	0	0.03	0.50728
GO:0004316	3-oxoacyl-[acyl-carrier-protein] reductase (NADPH) activity	5	1	0.17	0.50796
GO:0008289	lipid binding	137	4	4.71	0.50954
GO:0005527	macrolide binding	20	1	0.69	0.51068
GO:0005528	FK506 binding	20	1	0.69	0.51068
GO:0008121	ubiquinol-cytochrome-c reductase activity	13	0	0.45	0.51079
GO:0004000	adenosine deaminase activity	2	0	0.07	0.51248
GO:0031957	very long-chain fatty acid-CoA ligase activity	3	1	0.1	0.51303
GO:0004571	mannosyl-oligosaccharide 1,2-alpha-mannosidase activity	4	0	0.14	0.51326
GO:0015924	mannosyl-oligosaccharide mannosidase activity	4	0	0.14	0.51326
GO:0032542	sulfiredoxin activity	1	0	0.03	0.51592
GO:0070403	NAD+ binding	4	0	0.14	0.5162
GO:0045552	dihydrokaempferol 4-reductase activity	3	1	0.1	0.51621
GO:0046873	metal ion transmembrane transporter activity	158	16	5.43	0.51654
GO:0046429	4-hydroxy-3-methylbut-2-en-1-yl diphosphate synthase activity	2	0	0.07	0.51671
GO:0047787	delta4-3-oxosteroid 5beta-reductase activity	2	0	0.07	0.51676
GO:0070001	aspartic-type peptidase activity	71	1	2.44	0.51919
GO:0004190	aspartic-type endopeptidase activity	71	1	2.44	0.51919
GO:0032029	myosin tail binding	6	0	0.21	0.5194
GO:0030742	GTP-dependent protein binding	6	0	0.21	0.5194
GO:0032036	myosin heavy chain binding	6	0	0.21	0.5194
GO:0080115	myosin XI tail binding	6	0	0.21	0.5194
GO:0017022	myosin binding	6	0	0.21	0.5194
GO:0005548	phospholipid transporter activity	15	1	0.52	0.51985
GO:0016762	xyloglucan:xyloglucosyl transferase activity	19	3	0.65	0.51991
GO:0004799	thymidylate synthase activity	3	0	0.1	0.5208
GO:0042083	5,10-methylenetetrahydrofolate-dependent methyltransferase activity	3	0	0.1	0.5208
GO:0015932	nucleobase-containing compound transmembrane transporter activity	22	2	0.76	0.52221
GO:0004816	asparagine-tRNA ligase activity	3	0	0.1	0.52299
GO:0004708	MAP kinase kinase activity	2	0	0.07	0.52312
GO:0008987	quinolinate synthetase A activity	1	0	0.03	0.52332
GO:0043024	ribosomal small subunit binding	2	0	0.07	0.52345
GO:0050833	pyruvate transmembrane transporter activity	1	0	0.03	0.52466
GO:0016846	carbon-sulfur lyase activity	29	2	1	0.52491
GO:0004419	hydroxymethylglutaryl-CoA lyase activity	1	0	0.03	0.52648
GO:0016713	oxidoreductase activity, acting on paired donors, with incorporation or reduction of molecular oxygen, reduced iron-sulfur protein as one donor, and incorporation of one atom of oxygen	1	0	0.03	0.52664
GO:0018685	alkane 1-monooxygenase activity	1	0	0.03	0.52664
GO:0080025	phosphatidylinositol-3,5-bisphosphate binding	3	0	0.1	0.52668
GO:1902936	phosphatidylinositol bisphosphate binding	3	0	0.1	0.52668
GO:0008022	protein C-terminus binding	1	0	0.03	0.52672
GO:0016767	geranylgeranyl-diphosphate geranylgeranyltransferase activity	3	0	0.1	0.5275
GO:0005338	nucleotide-sugar transmembrane transporter activity	6	0	0.21	0.52813
GO:0030975	thiamine binding	2	0	0.07	0.53004
GO:0004788	thiamine diphosphokinase activity	2	0	0.07	0.53004
GO:0016829	lyase activity	399	18	13.72	0.53061
GO:0005096	GTPase activator activity	27	0	0.93	0.53106
GO:0005365	myo-inositol transmembrane transporter activity	3	1	0.1	0.53179
GO:0005366	myo-inositol:proton symporter activity	3	1	0.1	0.53179
GO:0070006	metalloaminopeptidase activity	10	0	0.34	0.53214
GO:0004830	tryptophan-tRNA ligase activity	2	0	0.07	0.53228
GO:0080044	quercetin 7-O-glucosyltransferase activity	51	1	1.75	0.53467
GO:0001882	nucleoside binding	1742	68	59.89	0.53481
GO:0032549	ribonucleoside binding	1742	68	59.89	0.53481
GO:0016755	transferase activity, transferring amino-acyl groups	14	1	0.48	0.5357
GO:0003866	3-phosphoshikimate 1-carboxyvinyltransferase activity	3	1	0.1	0.53591
GO:0019146	arabinose-5-phosphate isomerase activity	3	0	0.1	0.53724
GO:0042826	histone deacetylase binding	1	0	0.03	0.53812
GO:0051020	GTPase binding	34	0	1.17	0.53825
GO:0003871	5-methyltetrahydropteroyltriglutamate-homocysteine S-methyltransferase activity	8	1	0.28	0.53866
GO:0042085	5-methyltetrahydropteroyltri-L-glutamate-dependent methyltransferase activity	8	1	0.28	0.53866
GO:0004124	cysteine synthase activity	10	0	0.34	0.53929
GO:0005381	iron ion transmembrane transporter activity	10	0	0.34	0.54067
GO:0005384	manganese ion transmembrane transporter activity	10	0	0.34	0.54067
GO:0004148	dihydrolipoyl dehydrogenase activity	2	0	0.07	0.54075
GO:0032451	demethylase activity	5	0	0.17	0.54167
GO:0004013	adenosylhomocysteinase activity	3	0	0.1	0.54256
GO:0016801	hydrolase activity, acting on ether bonds	3	0	0.1	0.54256
GO:0016802	trialkylsulfonium hydrolase activity	3	0	0.1	0.54256
GO:0097599	xylanase activity	5	0	0.17	0.54256
GO:0009044	xylan 1,4-beta-xylosidase activity	5	0	0.17	0.54256
GO:0003785	actin monomer binding	6	0	0.21	0.5427
GO:0031072	heat shock protein binding	23	0	0.79	0.5438
GO:0003676	nucleic acid binding	2341	47	80.49	0.54621
GO:0004318	enoyl-[acyl-carrier-protein] reductase (NADH) activity	2	0	0.07	0.54643
GO:0015298	solute:cation antiporter activity	38	4	1.31	0.5468
GO:0033862	UMP kinase activity	1	0	0.03	0.54878
GO:0090595	acetyl-CoA:L-lysine N6-acetyltransferase	16	1	0.55	0.54907
GO:0004402	histone acetyltransferase activity	16	1	0.55	0.54907
GO:0004422	hypoxanthine phosphoribosyltransferase activity	1	0	0.03	0.54926
GO:0005460	UDP-glucose transmembrane transporter activity	1	0	0.03	0.54942
GO:0005459	UDP-galactose transmembrane transporter activity	1	0	0.03	0.54942
GO:0019172	glyoxalase III activity	5	0	0.17	0.54968
GO:0061598	molybdopterin adenylyltransferase activity	1	0	0.03	0.55085
GO:0061599	molybdopterin molybdotransferase activity	1	0	0.03	0.55085
GO:0005216	ion channel activity	79	3	2.72	0.55195
GO:0004298	threonine-type endopeptidase activity	23	0	0.79	0.55199
GO:0070003	threonine-type peptidase activity	23	0	0.79	0.55199
GO:0047066	phospholipid-hydroperoxide glutathione peroxidase activity	8	0	0.28	0.55335
GO:0004412	homoserine dehydrogenase activity	1	0	0.03	0.55396
GO:0050514	homospermidine synthase (spermidine-specific) activity	1	0	0.03	0.5542
GO:0034038	deoxyhypusine synthase activity	1	0	0.03	0.5542
GO:0004851	uroporphyrin-III C-methyltransferase activity	1	0	0.03	0.555
GO:0016842	amidine-lyase activity	4	0	0.14	0.55541
GO:0046556	alpha-L-arabinofuranosidase activity	9	0	0.31	0.55554
GO:0009019	tRNA (guanine-N1-)-methyltransferase activity	5	0	0.17	0.55557
GO:0016160	amylase activity	9	1	0.31	0.55611
GO:0004556	alpha-amylase activity	5	0	0.17	0.55628
GO:0016871	cycloartenol synthase activity	3	0	0.1	0.5565
GO:0022890	inorganic cation transmembrane transporter activity	342	23	11.76	0.55683
GO:0003838	sterol 24-C-methyltransferase activity	1	0	0.03	0.55699
GO:0000175	3'-5'-exoribonuclease activity	11	0	0.38	0.5577
GO:0005034	osmosensor activity	1	0	0.03	0.55867
GO:0004399	histidinol dehydrogenase activity	1	0	0.03	0.55907
GO:0002020	protease binding	3	1	0.1	0.55908
GO:0008237	metallopeptidase activity	86	1	2.96	0.55937
GO:0052832	inositol monophosphate 3-phosphatase activity	2	0	0.07	0.55963
GO:0052833	inositol monophosphate 4-phosphatase activity	2	0	0.07	0.55963
GO:0043138	3'-5' DNA helicase activity	9	0	0.31	0.5597
GO:0003975	UDP-N-acetylglucosamine-dolichyl-phosphate N-acetylglucosaminephosphotransferase activity	1	0	0.03	0.55971
GO:0000140	acylglycerone-phosphate reductase activity	1	0	0.03	0.55995
GO:0004812	aminoacyl-tRNA ligase activity	75	2	2.58	0.56034
GO:0000702	oxidized base lesion DNA N-glycosylase activity	4	0	0.14	0.56036
GO:0016744	transferase activity, transferring aldehyde or ketonic groups	16	0	0.55	0.56181
GO:0004163	diphosphomevalonate decarboxylase activity	1	0	0.03	0.56203
GO:0016426	tRNA (adenine) methyltransferase activity	4	0	0.14	0.56276
GO:0016429	tRNA (adenine-N1-)-methyltransferase activity	4	0	0.14	0.56276
GO:0003779	actin binding	68	5	2.34	0.563
GO:0008531	riboflavin kinase activity	2	0	0.07	0.56438
GO:0008242	omega peptidase activity	6	0	0.21	0.56456
GO:0017169	CDP-alcohol phosphatidyltransferase activity	5	0	0.17	0.56468
GO:0003864	3-methyl-2-oxobutanoate hydroxymethyltransferase activity	2	0	0.07	0.56506
GO:0031409	pigment binding	12	0	0.41	0.56611
GO:0008553	hydrogen-exporting ATPase activity, phosphorylative mechanism	27	0	0.93	0.56654
GO:0015662	ATPase activity, coupled to transmembrane movement of ions, phosphorylative mechanism	43	2	1.48	0.56722
GO:0004823	leucine-tRNA ligase activity	1	0	0.03	0.56763
GO:0008327	methyl-CpG binding	3	0	0.1	0.56776
GO:0047746	chlorophyllase activity	1	0	0.03	0.56859
GO:2001080	chitosan binding	1	0	0.03	0.56875
GO:0005262	calcium channel activity	2	0	0.07	0.56941
GO:0030515	snoRNA binding	16	0	0.55	0.57051
GO:0004489	methylenetetrahydrofolate reductase (NAD(P)H) activity	1	0	0.03	0.57083
GO:0019901	protein kinase binding	31	2	1.07	0.57194
GO:0003860	3-hydroxyisobutyryl-CoA hydrolase activity	6	0	0.21	0.57273
GO:0000049	tRNA binding	10	0	0.34	0.57337
GO:0046933	proton-transporting ATP synthase activity, rotational mechanism	37	1	1.27	0.57364
GO:0004514	nicotinate-nucleotide diphosphorylase (carboxylating) activity	2	0	0.07	0.57502
GO:0004794	L-threonine ammonia-lyase activity	2	0	0.07	0.57525
GO:0005337	nucleoside transmembrane transporter activity	11	2	0.38	0.5757
GO:0016790	thiolester hydrolase activity	23	0	0.79	0.57592
GO:0097472	cyclin-dependent protein kinase activity	5	0	0.17	0.57847
GO:0004693	cyclin-dependent protein serine/threonine kinase activity	5	0	0.17	0.57847
GO:0003904	deoxyribodipyrimidine photo-lyase activity	2	0	0.07	0.57865
GO:0015114	phosphate ion transmembrane transporter activity	2	0	0.07	0.57882
GO:0015556	C4-dicarboxylate transmembrane transporter activity	13	0	0.45	0.57975
GO:0005458	GDP-mannose transmembrane transporter activity	3	0	0.1	0.58007
GO:0036080	purine nucleotide-sugar transmembrane transporter activity	3	0	0.1	0.58007
GO:0050468	reticuline oxidase activity	2	0	0.07	0.58047
GO:0046992	oxidoreductase activity, acting on X-H and Y-H to form an X-Y bond	2	0	0.07	0.58047
GO:0046993	oxidoreductase activity, acting on X-H and Y-H to form an X-Y bond, with oxygen as acceptor	2	0	0.07	0.58047
GO:0019238	cyclohydrolase activity	8	0	0.28	0.58182
GO:0004596	peptide alpha-N-acetyltransferase activity	15	0	0.52	0.5824
GO:0034212	peptide N-acetyltransferase activity	15	0	0.52	0.5824
GO:0031177	phosphopantetheine binding	5	1	0.17	0.58278
GO:0052684	L-serine hydro-lyase (adding indole, L-tryptophan-forming) activity	1	0	0.03	0.58366
GO:0070569	uridylyltransferase activity	9	0	0.31	0.58376
GO:0004828	serine-tRNA ligase activity	2	0	0.07	0.58438
GO:0004177	aminopeptidase activity	18	0	0.62	0.58488
GO:0008893	guanosine-3',5'-bis(diphosphate) 3'-diphosphatase activity	4	0	0.14	0.58616
GO:0016794	diphosphoric monoester hydrolase activity	4	0	0.14	0.58616
GO:0035613	RNA stem-loop binding	4	0	0.14	0.58665
GO:0035614	snRNA stem-loop binding	4	0	0.14	0.58665
GO:0015112	nitrate transmembrane transporter activity	5	0	0.17	0.58691
GO:0009927	histidine phosphotransfer kinase activity	13	0	0.45	0.58712
GO:0080043	quercetin 3-O-glucosyltransferase activity	52	1	1.79	0.58718
GO:0080019	fatty-acyl-CoA reductase (alcohol-forming) activity	8	0	0.28	0.58721
GO:0008092	cytoskeletal protein binding	142	5	4.88	0.58816
GO:0019902	phosphatase binding	6	0	0.21	0.58907
GO:0019903	protein phosphatase binding	6	0	0.21	0.58907
GO:0004152	dihydroorotate dehydrogenase activity	3	0	0.1	0.58915
GO:0008312	7S RNA binding	11	0	0.38	0.58967
GO:0003885	D-arabinono-1,4-lactone oxidase activity	2	0	0.07	0.5904
GO:0008131	primary amine oxidase activity	6	0	0.21	0.59048
GO:0005463	UDP-N-acetylgalactosamine transmembrane transporter activity	1	0	0.03	0.59112
GO:0008375	acetylglucosaminyltransferase activity	31	0	1.07	0.5913
GO:0016679	oxidoreductase activity, acting on diphenols and related substances as donors	41	3	1.41	0.59155
GO:0017113	dihydropyrimidine dehydrogenase (NADP+) activity	1	0	0.03	0.59265
GO:0003886	DNA (cytosine-5-)-methyltransferase activity	7	0	0.24	0.59265
GO:0009008	DNA-methyltransferase activity	7	0	0.24	0.59265
GO:0043682	copper-transporting ATPase activity	4	0	0.14	0.59275
GO:0015505	uracil:cation symporter activity	1	0	0.03	0.59321
GO:0015391	nucleobase:cation symporter activity	1	0	0.03	0.59321
GO:0005274	allantoin uptake transmembrane transporter activity	1	0	0.03	0.59321
GO:0004575	sucrose alpha-glucosidase activity	8	1	0.28	0.59383
GO:0050112	inositol 2-dehydrogenase activity	1	0	0.03	0.59402
GO:0031406	carboxylic acid binding	79	5	2.72	0.59466
GO:0043177	organic acid binding	79	5	2.72	0.59466
GO:0030755	quercetin 3-O-methyltransferase activity	2	0	0.07	0.59562
GO:0030744	luteolin O-methyltransferase activity	2	0	0.07	0.59562
GO:0033799	myricetin 3'-O-methyltransferase activity	2	0	0.07	0.59562
GO:0030752	5-hydroxyfuranocoumarin 5-O-methyltransferase activity	2	0	0.07	0.59574
GO:0017016	Ras GTPase binding	32	0	1.1	0.59605
GO:0031267	small GTPase binding	32	0	1.1	0.59605
GO:0005372	water transmembrane transporter activity	32	0	1.1	0.59646
GO:0015250	water channel activity	32	0	1.1	0.59646
GO:0019955	cytokine binding	2	0	0.07	0.5971
GO:0009784	transmembrane receptor histidine kinase activity	2	0	0.07	0.5971
GO:0009884	cytokinin receptor activity	2	0	0.07	0.5971
GO:0009885	transmembrane histidine kinase cytokinin receptor activity	2	0	0.07	0.5971
GO:0016742	hydroxymethyl-, formyl- and related transferase activity	21	0	0.72	0.598
GO:0003939	L-iditol 2-dehydrogenase activity	2	0	0.07	0.5992
GO:0010354	homogentisate prenyltransferase activity	1	0	0.03	0.59932
GO:0004861	cyclin-dependent protein serine/threonine kinase inhibitor activity	2	0	0.07	0.6
GO:0030291	protein serine/threonine kinase inhibitor activity	2	0	0.07	0.6
GO:0004707	MAP kinase activity	13	2	0.45	0.60279
GO:0016889	endodeoxyribonuclease activity, producing 3'-phosphomonoesters	2	0	0.07	0.60295
GO:0048027	mRNA 5'-UTR binding	4	0	0.14	0.60328
GO:0008841	dihydrofolate synthase activity	1	0	0.03	0.60334
GO:0004614	phosphoglucomutase activity	3	0	0.1	0.60372
GO:0019778	Atg12 activating enzyme activity	2	0	0.07	0.60523
GO:0019779	Atg8 activating enzyme activity	2	0	0.07	0.60523
GO:0015377	cation:chloride symporter activity	2	0	0.07	0.60869
GO:0015379	potassium:chloride symporter activity	2	0	0.07	0.60869
GO:0015296	anion:cation symporter activity	2	0	0.07	0.60869
GO:0070283	radical SAM enzyme activity	6	0	0.21	0.60912
GO:0051733	polydeoxyribonucleotide kinase activity	3	0	0.1	0.60919
GO:0051734	ATP-dependent polynucleotide kinase activity	3	0	0.1	0.60919
GO:0046403	polynucleotide 3'-phosphatase activity	3	0	0.1	0.60919
GO:0046404	ATP-dependent polydeoxyribonucleotide 5'-hydroxyl-kinase activity	3	0	0.1	0.60919
GO:0008097	5S rRNA binding	15	0	0.52	0.60937
GO:0020037	heme binding	258	14	8.87	0.61006
GO:0015207	adenine transmembrane transporter activity	1	0	0.03	0.61017
GO:0015208	guanine transmembrane transporter activity	1	0	0.03	0.61017
GO:0004061	arylformamidase activity	3	0	0.1	0.61031
GO:0050552	(4S)-limonene synthase activity	3	0	0.1	0.61077
GO:0015098	molybdate ion transmembrane transporter activity	4	0	0.14	0.6122
GO:0052906	tRNA (guanine(37)-N(1))-methyltransferase activity	2	0	0.07	0.61227
GO:0004675	transmembrane receptor protein serine/threonine kinase activity	3	0	0.1	0.61341
GO:0015077	monovalent inorganic cation transmembrane transporter activity	257	15	8.84	0.61674
GO:0045174	glutathione dehydrogenase (ascorbate) activity	2	0	0.07	0.61688
GO:0016672	oxidoreductase activity, acting on a sulfur group of donors, quinone or similar compound as acceptor	2	0	0.07	0.61688
GO:0004008	copper-exporting ATPase activity	1	0	0.03	0.61901
GO:0004818	glutamate-tRNA ligase activity	2	0	0.07	0.61921
GO:0008184	glycogen phosphorylase activity	6	0	0.21	0.61975
GO:0015035	protein disulfide oxidoreductase activity	66	0	2.27	0.62095
GO:0010178	IAA-amino acid conjugate hydrolase activity	2	0	0.07	0.62102
GO:0042409	caffeoyl-CoA O-methyltransferase activity	4	1	0.14	0.62156
GO:1901505	carbohydrate derivative transporter activity	24	3	0.83	0.62171
GO:0003857	3-hydroxyacyl-CoA dehydrogenase activity	5	0	0.17	0.62302
GO:0019200	carbohydrate kinase activity	42	4	1.44	0.62341
GO:0071077	adenosine 3',5'-bisphosphate transmembrane transporter activity	1	0	0.03	0.62463
GO:0051185	coenzyme transporter activity	1	0	0.03	0.62463
GO:0015228	coenzyme A transmembrane transporter activity	1	0	0.03	0.62463
GO:0043021	ribonucleoprotein complex binding	39	0	1.34	0.62629
GO:0016615	malate dehydrogenase activity	32	0	1.1	0.62862
GO:0008972	phosphomethylpyrimidine kinase activity	1	0	0.03	0.62904
GO:0048029	monosaccharide binding	25	3	0.86	0.62938
GO:0004424	imidazoleglycerol-phosphate dehydratase activity	1	0	0.03	0.63073
GO:0042586	peptide deformylase activity	2	0	0.07	0.63164
GO:0004160	dihydroxy-acid dehydratase activity	1	0	0.03	0.63297
GO:0097159	organic cyclic compound binding	5269	158	181.16	0.63346
GO:0032041	NAD-dependent histone deacetylase activity (H3-K14 specific)	4	0	0.14	0.63396
GO:0017136	NAD-dependent histone deacetylase activity	4	0	0.14	0.63396
GO:0034979	NAD-dependent protein deacetylase activity	4	0	0.14	0.63396
GO:0031078	histone deacetylase activity (H3-K14 specific)	4	0	0.14	0.63396
GO:0001085	RNA polymerase II transcription factor binding	10	0	0.34	0.63446
GO:0071949	FAD binding	3	0	0.1	0.63488
GO:0004362	glutathione-disulfide reductase activity	2	0	0.07	0.63572
GO:1901677	phosphate transmembrane transporter activity	34	3	1.17	0.63655
GO:0016621	cinnamoyl-CoA reductase activity	5	0	0.17	0.63827
GO:0000014	single-stranded DNA endodeoxyribonuclease activity	2	0	0.07	0.63833
GO:0004335	galactokinase activity	3	0	0.1	0.64048
GO:0004792	thiosulfate sulfurtransferase activity	2	0	0.07	0.64071
GO:0004140	dephospho-CoA kinase activity	4	0	0.14	0.64237
GO:0005047	signal recognition particle binding	8	0	0.28	0.64244
GO:0030276	clathrin binding	5	0	0.17	0.64257
GO:1901363	heterocyclic compound binding	5265	158	181.02	0.64322
GO:0032403	protein complex binding	105	1	3.61	0.64394
GO:0008311	double-stranded DNA 3'-5' exodeoxyribonuclease activity	4	1	0.14	0.64498
GO:0008309	double-stranded DNA exodeoxyribonuclease activity	4	1	0.14	0.64498
GO:0043864	indoleacetamide hydrolase activity	1	0	0.03	0.64531
GO:0016859	cis-trans isomerase activity	57	3	1.96	0.64644
GO:0003755	peptidyl-prolyl cis-trans isomerase activity	57	3	1.96	0.64644
GO:0031625	ubiquitin protein ligase binding	58	1	1.99	0.64664
GO:0044389	ubiquitin-like protein ligase binding	58	1	1.99	0.64664
GO:0004832	valine-tRNA ligase activity	2	0	0.07	0.64665
GO:0003688	DNA replication origin binding	5	0	0.17	0.64866
GO:0003954	NADH dehydrogenase activity	82	1	2.82	0.64885
GO:0004150	dihydroneopterin aldolase activity	3	0	0.1	0.64926
GO:0004165	dodecenoyl-CoA delta-isomerase activity	1	0	0.03	0.65315
GO:0001104	RNA polymerase II transcription cofactor activity	14	0	0.48	0.65416
GO:0016855	racemase and epimerase activity, acting on amino acids and derivatives	6	0	0.21	0.65557
GO:0008574	ATP-dependent microtubule motor activity, plus-end-directed	17	0	0.58	0.65573
GO:0008806	carboxymethylenebutenolidase activity	1	0	0.03	0.65658
GO:0016618	hydroxypyruvate reductase activity	4	0	0.14	0.65689
GO:0008378	galactosyltransferase activity	20	1	0.69	0.65714
GO:0016875	ligase activity, forming carbon-oxygen bonds	76	2	2.61	0.65807
GO:0016876	ligase activity, forming aminoacyl-tRNA and related compounds	76	2	2.61	0.65807
GO:0016149	translation release factor activity, codon specific	13	0	0.45	0.65814
GO:0016819	hydrolase activity, acting on acid anhydrides, in sulfonyl-containing anhydrides	1	0	0.03	0.65874
GO:0047627	adenylylsulfatase activity	1	0	0.03	0.65874
GO:0008490	arsenite secondary active transmembrane transporter activity	3	0	0.1	0.65908
GO:0015446	ATPase-coupled arsenite transmembrane transporter activity	3	0	0.1	0.65908
GO:0004662	CAAX-protein geranylgeranyltransferase activity	2	0	0.07	0.65908
GO:0008891	glycolate oxidase activity	2	0	0.07	0.65987
GO:0019154	glycolate dehydrogenase activity	2	0	0.07	0.65987
GO:0016898	oxidoreductase activity, acting on the CH-OH group of donors, cytochrome as acceptor	2	0	0.07	0.65987
GO:0004458	D-lactate dehydrogenase (cytochrome) activity	2	0	0.07	0.65987
GO:0008720	D-lactate dehydrogenase activity	2	0	0.07	0.65987
GO:0004478	methionine adenosyltransferase activity	9	0	0.31	0.66018
GO:0051920	peroxiredoxin activity	6	1	0.21	0.66026
GO:0004127	cytidylate kinase activity	2	0	0.07	0.66043
GO:0004121	cystathionine beta-lyase activity	4	1	0.14	0.66047
GO:0008810	cellulase activity	17	1	0.58	0.66059
GO:0034593	phosphatidylinositol bisphosphate phosphatase activity	5	0	0.17	0.6608
GO:0034595	phosphatidylinositol phosphate 5-phosphatase activity	5	0	0.17	0.6608
GO:0004439	phosphatidylinositol-4,5-bisphosphate 5-phosphatase activity	5	0	0.17	0.6608
GO:0004791	thioredoxin-disulfide reductase activity	3	0	0.1	0.66106
GO:0051213	dioxygenase activity	143	10	4.92	0.66195
GO:0001055	RNA polymerase II activity	12	0	0.41	0.66257
GO:0004650	polygalacturonase activity	31	2	1.07	0.66288
GO:0017112	Rab guanyl-nucleotide exchange factor activity	2	0	0.07	0.66387
GO:0080023	3R-hydroxyacyl-CoA dehydratase activity	3	0	0.1	0.66469
GO:0048038	quinone binding	38	0	1.31	0.66514
GO:0015204	urea transmembrane transporter activity	3	0	0.1	0.66598
GO:0044022	histone kinase activity (H3-S28 specific)	2	0	0.07	0.66634
GO:0035175	histone kinase activity (H3-S10 specific)	2	0	0.07	0.66634
GO:0047937	glucose-1-phosphate phosphodismutase activity	1	0	0.03	0.66654
GO:0016810	hydrolase activity, acting on carbon-nitrogen (but not peptide) bonds	73	1	2.51	0.66909
GO:0008728	GTP diphosphokinase activity	3	0	0.1	0.66992
GO:0000339	RNA cap binding	4	0	0.14	0.67026
GO:0018738	S-formylglutathione hydrolase activity	4	0	0.14	0.6703
GO:0030628	pre-mRNA 3'-splice site binding	1	0	0.03	0.67091
GO:0090599	alpha-glucosidase activity	14	1	0.48	0.67295
GO:0051010	microtubule plus-end binding	1	0	0.03	0.6748
GO:0015002	heme-copper terminal oxidase activity	15	0	0.52	0.67508
GO:0016675	oxidoreductase activity, acting on a heme group of donors	15	0	0.52	0.67508
GO:0016676	oxidoreductase activity, acting on a heme group of donors, oxygen as acceptor	15	0	0.52	0.67508
GO:0004129	cytochrome-c oxidase activity	15	0	0.52	0.67508
GO:0004594	pantothenate kinase activity	3	0	0.1	0.67835
GO:0004549	tRNA-specific ribonuclease activity	15	0	0.52	0.67846
GO:0004558	alpha-1,4-glucosidase activity	6	0	0.21	0.67885
GO:0032450	maltose alpha-glucosidase activity	6	0	0.21	0.67885
GO:0017168	5-oxoprolinase (ATP-hydrolyzing) activity	2	0	0.07	0.67964
GO:0004089	carbonate dehydratase activity	7	1	0.24	0.68163
GO:0030955	potassium ion binding	16	2	0.55	0.68226
GO:0004743	pyruvate kinase activity	16	2	0.55	0.68226
GO:0031420	alkali metal ion binding	16	2	0.55	0.68226
GO:0050242	pyruvate, phosphate dikinase activity	2	0	0.07	0.68227
GO:0016717	oxidoreductase activity, acting on paired donors, with oxidation of a pair of donors resulting in the reduction of molecular oxygen to two molecules of water	26	0	0.89	0.68329
GO:0015254	glycerol channel activity	31	0	1.07	0.68434
GO:0004132	dCMP deaminase activity	1	0	0.03	0.68493
GO:0008447	L-ascorbate oxidase activity	3	0	0.1	0.68515
GO:0032947	protein complex scaffold activity	1	0	0.03	0.68572
GO:0019213	deacetylase activity	7	0	0.24	0.68644
GO:0016838	carbon-oxygen lyase activity, acting on phosphates	39	2	1.34	0.68706
GO:0016635	oxidoreductase activity, acting on the CH-CH group of donors, quinone or related compound as acceptor	16	0	0.55	0.6871
GO:0050088	mannose-6-phosphate 6-reductase activity	1	0	0.03	0.68753
GO:0004151	dihydroorotase activity	1	0	0.03	0.68777
GO:0015078	hydrogen ion transmembrane transporter activity	185	6	6.36	0.688
GO:0004645	phosphorylase activity	9	0	0.31	0.68806
GO:0016899	oxidoreductase activity, acting on the CH-OH group of donors, oxygen as acceptor	12	0	0.41	0.68842
GO:0000386	second spliceosomal transesterification activity	6	0	0.21	0.68869
GO:0004652	polynucleotide adenylyltransferase activity	2	0	0.07	0.68908
GO:0000994	RNA polymerase III core binding	1	0	0.03	0.6895
GO:0004350	glutamate-5-semialdehyde dehydrogenase activity	9	1	0.31	0.68968
GO:0008859	exoribonuclease II activity	1	0	0.03	0.69045
GO:0010303	limit dextrinase activity	1	0	0.03	0.691
GO:0051060	pullulanase activity	1	0	0.03	0.691
GO:0015563	uptake transmembrane transporter activity	2	0	0.07	0.69103
GO:0009378	four-way junction helicase activity	3	0	0.1	0.69189
GO:0043140	ATP-dependent 3'-5' DNA helicase activity	3	0	0.1	0.69189
GO:0003714	transcription corepressor activity	3	0	0.1	0.69411
GO:0005506	iron ion binding	248	6	8.53	0.69439
GO:0010486	manganese:proton antiporter activity	1	0	0.03	0.69611
GO:0048487	beta-tubulin binding	3	0	0.1	0.69652
GO:0004143	diacylglycerol kinase activity	9	0	0.31	0.69702
GO:0034513	box H/ACA snoRNA binding	1	0	0.03	0.69713
GO:0005088	Ras guanyl-nucleotide exchange factor activity	9	0	0.31	0.69747
GO:0035173	histone kinase activity	3	0	0.1	0.69783
GO:0035174	histone serine kinase activity	3	0	0.1	0.69783
GO:0003830	beta-1,4-mannosylglycoprotein 4-beta-N-acetylglucosaminyltransferase activity	4	0	0.14	0.69943
GO:0008479	queuine tRNA-ribosyltransferase activity	6	0	0.21	0.70091
GO:0016778	diphosphotransferase activity	8	0	0.28	0.70308
GO:0016885	ligase activity, forming carbon-carbon bonds	10	0	0.34	0.70314
GO:0003989	acetyl-CoA carboxylase activity	10	0	0.34	0.70314
GO:0016421	CoA carboxylase activity	10	0	0.34	0.70314
GO:0000268	peroxisome targeting sequence binding	2	0	0.07	0.70434
GO:0005052	peroxisome matrix targeting signal-1 binding	2	0	0.07	0.70434
GO:0004655	porphobilinogen synthase activity	1	0	0.03	0.7048
GO:0016667	oxidoreductase activity, acting on a sulfur group of donors	101	1	3.47	0.7065
GO:0019205	nucleobase-containing compound kinase activity	52	1	1.79	0.70753
GO:0046316	gluconokinase activity	1	0	0.03	0.70808
GO:0030695	GTPase regulator activity	37	1	1.27	0.70834
GO:0045735	nutrient reservoir activity	37	0	1.27	0.70874
GO:0050278	sedoheptulose-bisphosphatase activity	3	0	0.1	0.70876
GO:0016835	carbon-oxygen lyase activity	146	7	5.02	0.70878
GO:0004488	methylenetetrahydrofolate dehydrogenase (NADP+) activity	2	0	0.07	0.70936
GO:0004477	methenyltetrahydrofolate cyclohydrolase activity	2	0	0.07	0.70936
GO:0031593	polyubiquitin modification-dependent protein binding	2	0	0.07	0.70953
GO:0070628	proteasome binding	2	0	0.07	0.70953
GO:0003881	CDP-diacylglycerol-inositol 3-phosphatidyltransferase activity	3	0	0.1	0.70974
GO:0016312	inositol bisphosphate phosphatase activity	3	0	0.1	0.71109
GO:0004441	inositol-1,4-bisphosphate 1-phosphatase activity	3	0	0.1	0.71109
GO:0008759	UDP-3-O-[3-hydroxymyristoyl] N-acetylglucosamine deacetylase activity	1	0	0.03	0.71151
GO:0016987	sigma factor activity	6	0	0.21	0.71165
GO:0000996	core DNA-dependent RNA polymerase binding promoter specificity activity	6	0	0.21	0.71165
GO:0035251	UDP-glucosyltransferase activity	140	4	4.81	0.71239
GO:0004359	glutaminase activity	3	0	0.1	0.71388
GO:0000155	phosphorelay sensor kinase activity	16	0	0.55	0.71399
GO:0045330	aspartyl esterase activity	20	0	0.69	0.71482
GO:0016634	oxidoreductase activity, acting on the CH-CH group of donors, oxygen as acceptor	24	0	0.83	0.71637
GO:0003906	DNA-(apurinic or apyrimidinic site) lyase activity	8	1	0.28	0.71742
GO:0035091	phosphatidylinositol binding	26	0	0.89	0.71785
GO:0004349	glutamate 5-kinase activity	8	1	0.28	0.71877
GO:0072341	modified amino acid binding	6	1	0.21	0.71931
GO:0004222	metalloendopeptidase activity	56	1	1.93	0.71986
GO:0022821	potassium ion antiporter activity	1	0	0.03	0.72027
GO:0003843	1,3-beta-D-glucan synthase activity	14	0	0.48	0.72092
GO:0015368	calcium:cation antiporter activity	9	1	0.31	0.72277
GO:0050897	cobalt ion binding	21	0	0.72	0.72346
GO:0033809	anthocyanin 6''-O-malonyltransferase activity	1	0	0.03	0.72405
GO:0044769	ATPase activity, coupled to transmembrane movement of ions, rotational mechanism	58	2	1.99	0.72443
GO:0016730	oxidoreductase activity, acting on iron-sulfur proteins as donors	4	0	0.14	0.72528
GO:0070717	poly-purine tract binding	2	0	0.07	0.72634
GO:0008143	poly(A) binding	2	0	0.07	0.72634
GO:0046554	malate dehydrogenase (NADP+) activity	1	0	0.03	0.72644
GO:0008565	protein transporter activity	62	0	2.13	0.72659
GO:0050378	UDP-glucuronate 4-epimerase activity	1	0	0.03	0.72744
GO:0052634	C-19 gibberellin 2-beta-dioxygenase activity	7	0	0.24	0.72814
GO:0047661	amino-acid racemase activity	2	0	0.07	0.72835
GO:0033818	beta-ketoacyl-acyl-carrier-protein synthase III activity	2	0	0.07	0.72878
GO:0032440	2-alkenal reductase [NAD(P)] activity	53	3	1.82	0.72895
GO:0035064	methylated histone binding	2	0	0.07	0.72911
GO:0050508	glucuronosyl-N-acetylglucosaminyl-proteoglycan 4-alpha-N-acetylglucosaminyltransferase activity	3	0	0.1	0.73023
GO:0070035	purine NTP-dependent helicase activity	95	2	3.27	0.73054
GO:0008026	ATP-dependent helicase activity	95	2	3.27	0.73054
GO:0033558	protein deacetylase activity	5	0	0.17	0.73059
GO:0004407	histone deacetylase activity	5	0	0.17	0.73059
GO:0046715	borate transmembrane transporter activity	3	0	0.1	0.73063
GO:0004523	RNA-DNA hybrid ribonuclease activity	5	0	0.17	0.73093
GO:0015168	glycerol transmembrane transporter activity	32	0	1.1	0.7321
GO:0051539	4 iron, 4 sulfur cluster binding	48	0	1.65	0.73326
GO:0015299	solute:proton antiporter activity	35	3	1.2	0.73355
GO:0002094	polyprenyltransferase activity	4	0	0.14	0.73403
GO:0016417	S-acyltransferase activity	14	0	0.48	0.73623
GO:0015121	phosphoenolpyruvate:phosphate antiporter activity	5	1	0.17	0.7376
GO:0008310	single-stranded DNA 3'-5' exodeoxyribonuclease activity	1	0	0.03	0.73763
GO:0008297	single-stranded DNA exodeoxyribonuclease activity	1	0	0.03	0.73763
GO:0052691	UDP-arabinopyranose mutase activity	5	0	0.17	0.73947
GO:0052743	inositol tetrakisphosphate phosphatase activity	1	0	0.03	0.73961
GO:0052658	inositol-1,4,5-trisphosphate 5-phosphatase activity	1	0	0.03	0.73961
GO:0052659	inositol-1,3,4,5-tetrakisphosphate 5-phosphatase activity	1	0	0.03	0.73961
GO:0004445	inositol-polyphosphate 5-phosphatase activity	1	0	0.03	0.73961
GO:0003979	UDP-glucose 6-dehydrogenase activity	2	0	0.07	0.74046
GO:0010340	carboxyl-O-methyltransferase activity	3	0	0.1	0.74135
GO:0051998	protein carboxyl O-methyltransferase activity	3	0	0.1	0.74135
GO:0003997	acyl-CoA oxidase activity	14	0	0.48	0.74168
GO:0033858	N-acetylgalactosamine kinase activity	2	0	0.07	0.74304
GO:0034722	gamma-glutamyl-peptidase activity	1	0	0.03	0.74356
GO:0005536	glucose binding	6	1	0.21	0.74406
GO:0000104	succinate dehydrogenase activity	4	0	0.14	0.74431
GO:0008177	succinate dehydrogenase (ubiquinone) activity	4	0	0.14	0.74431
GO:0004499	N,N-dimethylaniline monooxygenase activity	11	0	0.38	0.74461
GO:0016638	oxidoreductase activity, acting on the CH-NH2 group of donors	32	0	1.1	0.74487
GO:0052722	fatty acid in-chain hydroxylase activity	2	0	0.07	0.74497
GO:0008139	nuclear localization sequence binding	12	0	0.41	0.74524
GO:0004056	argininosuccinate lyase activity	2	0	0.07	0.74529
GO:0004053	arginase activity	2	0	0.07	0.74582
GO:0016862	intramolecular oxidoreductase activity, interconverting keto- and enol-groups	1	0	0.03	0.74659
GO:0050178	phenylpyruvate tautomerase activity	1	0	0.03	0.74659
GO:0016289	CoA hydrolase activity	7	0	0.24	0.74781
GO:0000703	oxidized pyrimidine nucleobase lesion DNA N-glycosylase activity	2	0	0.07	0.7486
GO:0008800	beta-lactamase activity	1	0	0.03	0.74863
GO:0004416	hydroxyacylglutathione hydrolase activity	1	0	0.03	0.74863
GO:0004854	xanthine dehydrogenase activity	7	0	0.24	0.74864
GO:0004003	ATP-dependent DNA helicase activity	10	0	0.34	0.75019
GO:0004144	diacylglycerol O-acyltransferase activity	11	0	0.38	0.75199
GO:0004019	adenylosuccinate synthase activity	2	0	0.07	0.75409
GO:0017171	serine hydrolase activity	185	7	6.36	0.7542
GO:0008236	serine-type peptidase activity	185	7	6.36	0.7542
GO:0045157	electron transporter, transferring electrons within the noncyclic electron transport pathway of photosynthesis activity	1	0	0.03	0.75517
GO:0090415	7-hydroxymethyl chlorophyll a reductase activity	1	0	0.03	0.75562
GO:0005089	Rho guanyl-nucleotide exchange factor activity	7	0	0.24	0.75564
GO:0001053	plastid sigma factor activity	2	0	0.07	0.75584
GO:0004697	protein kinase C activity	4	0	0.14	0.75648
GO:0019784	NEDD8-specific protease activity	1	0	0.03	0.7566
GO:0030554	adenyl nucleotide binding	1489	60	51.2	0.75692
GO:0004672	protein kinase activity	971	31	33.39	0.75813
GO:0004028	3-chloroallyl aldehyde dehydrogenase activity	2	0	0.07	0.75838
GO:0036422	heptaprenyl diphosphate synthase activity	2	0	0.07	0.75933
GO:0008296	3'-5'-exodeoxyribonuclease activity	6	1	0.21	0.76119
GO:0000774	adenyl-nucleotide exchange factor activity	3	0	0.1	0.76138
GO:0003960	NADPH:quinone reductase activity	1	0	0.03	0.7616
GO:0003933	GTP cyclohydrolase activity	4	0	0.14	0.76186
GO:0008660	1-aminocyclopropane-1-carboxylate deaminase activity	2	0	0.07	0.76275
GO:0019148	D-cysteine desulfhydrase activity	2	0	0.07	0.76275
GO:0016278	lysine N-methyltransferase activity	12	0	0.41	0.76287
GO:0016279	protein-lysine N-methyltransferase activity	12	0	0.41	0.76287
GO:0004096	catalase activity	6	1	0.21	0.76374
GO:0004372	glycine hydroxymethyltransferase activity	11	0	0.38	0.76403
GO:0004448	isocitrate dehydrogenase activity	8	0	0.28	0.76409
GO:1901618	organic hydroxy compound transmembrane transporter activity	38	2	1.31	0.76433
GO:0015665	alcohol transmembrane transporter activity	38	2	1.31	0.76433
GO:0046983	protein dimerization activity	276	10	9.49	0.76437
GO:0042286	glutamate-1-semialdehyde 2,1-aminomutase activity	1	0	0.03	0.76457
GO:0016869	intramolecular transferase activity, transferring amino groups	1	0	0.03	0.76457
GO:0015105	arsenite transmembrane transporter activity	4	0	0.14	0.76572
GO:0046527	glucosyltransferase activity	144	4	4.95	0.76871
GO:0052716	hydroquinone:oxygen oxidoreductase activity	20	0	0.69	0.76872
GO:0047763	caffeate O-methyltransferase activity	5	0	0.17	0.76884
GO:0008964	phosphoenolpyruvate carboxylase activity	6	1	0.21	0.76918
GO:0042134	rRNA primary transcript binding	2	0	0.07	0.77097
GO:0045544	gibberellin 20-oxidase activity	3	0	0.1	0.7719
GO:0004765	shikimate kinase activity	1	0	0.03	0.77233
GO:0010011	auxin binding	2	0	0.07	0.77258
GO:0070181	small ribosomal subunit rRNA binding	7	0	0.24	0.77279
GO:0004634	phosphopyruvate hydratase activity	7	1	0.24	0.77315
GO:0005471	ATP:ADP antiporter activity	4	0	0.14	0.77321
GO:0004450	isocitrate dehydrogenase (NADP+) activity	5	0	0.17	0.77329
GO:0031071	cysteine desulfurase activity	2	0	0.07	0.77378
GO:0004750	ribulose-phosphate 3-epimerase activity	2	0	0.07	0.77399
GO:0034511	U3 snoRNA binding	1	0	0.03	0.77637
GO:0035250	UDP-galactosyltransferase activity	3	0	0.1	0.77664
GO:0016773	phosphotransferase activity, alcohol group as acceptor	1110	41	38.16	0.77667
GO:0005543	phospholipid binding	62	1	2.13	0.77767
GO:0047987	hydroperoxide dehydratase activity	1	0	0.03	0.77783
GO:0004590	orotidine-5'-phosphate decarboxylase activity	1	0	0.03	0.7779
GO:0004588	orotate phosphoribosyltransferase activity	1	0	0.03	0.7779
GO:0050307	sucrose-phosphate phosphatase activity	1	0	0.03	0.77805
GO:0004649	poly(ADP-ribose) glycohydrolase activity	1	0	0.03	0.7782
GO:0018024	histone-lysine N-methyltransferase activity	4	0	0.14	0.77943
GO:0008892	guanine deaminase activity	1	0	0.03	0.78016
GO:0042625	ATPase coupled ion transmembrane transporter activity	118	5	4.06	0.7802
GO:0008079	translation termination factor activity	15	0	0.52	0.78039
GO:0003747	translation release factor activity	15	0	0.52	0.78039
GO:0010301	xanthoxin dehydrogenase activity	1	0	0.03	0.7814
GO:0008398	sterol 14-demethylase activity	2	0	0.07	0.78256
GO:0004802	transketolase activity	3	0	0.1	0.78329
GO:0042500	aspartic endopeptidase activity, intramembrane cleaving	5	0	0.17	0.7839
GO:0016308	1-phosphatidylinositol-4-phosphate 5-kinase activity	4	0	0.14	0.78456
GO:0050072	m7G(5')pppN diphosphatase activity	1	0	0.03	0.78554
GO:0004392	heme oxygenase (decyclizing) activity	1	0	0.03	0.79022
GO:0016847	1-aminocyclopropane-1-carboxylate synthase activity	6	1	0.21	0.7906
GO:0035004	phosphatidylinositol 3-kinase activity	2	0	0.07	0.79129
GO:0016303	1-phosphatidylinositol-3-kinase activity	2	0	0.07	0.79129
GO:0047911	galacturan 1,4-alpha-galacturonidase activity	4	0	0.14	0.79184
GO:0004849	uridine kinase activity	14	0	0.48	0.79198
GO:0004070	aspartate carbamoyltransferase activity	2	0	0.07	0.79306
GO:0003723	RNA binding	715	15	24.58	0.79358
GO:0016830	carbon-carbon lyase activity	131	4	4.5	0.79461
GO:0004449	isocitrate dehydrogenase (NAD+) activity	3	0	0.1	0.79542
GO:0002161	aminoacyl-tRNA editing activity	7	0	0.24	0.79562
GO:0017137	Rab GTPase binding	11	0	0.38	0.79575
GO:0046906	tetrapyrrole binding	310	14	10.66	0.79612
GO:0047947	glutamine N-phenylacetyltransferase activity	1	0	0.03	0.79637
GO:1901974	glycerate transmembrane transporter activity	1	0	0.03	0.79716
GO:0043879	glycolate transmembrane transporter activity	1	0	0.03	0.79716
GO:0016896	exoribonuclease activity, producing 5'-phosphomonoesters	13	0	0.45	0.79724
GO:0004532	exoribonuclease activity	13	0	0.45	0.79724
GO:0004642	phosphoribosylformylglycinamidine synthase activity	1	0	0.03	0.79765
GO:0070037	rRNA (pseudouridine) methyltransferase activity	2	0	0.07	0.79785
GO:0046577	long-chain-alcohol oxidase activity	3	0	0.1	0.79874
GO:0003984	acetolactate synthase activity	5	0	0.17	0.79976
GO:0031516	far-red light photoreceptor activity	1	0	0.03	0.80098
GO:0009883	red or far-red light photoreceptor activity	1	0	0.03	0.80098
GO:0045156	electron transporter, transferring electrons within the cyclic electron transport pathway of photosynthesis activity	14	0	0.48	0.801
GO:0008839	4-hydroxy-tetrahydrodipicolinate reductase	2	0	0.07	0.8025
GO:0005200	structural constituent of cytoskeleton	32	1	1.1	0.80364
GO:0016427	tRNA (cytosine) methyltransferase activity	1	0	0.03	0.80472
GO:0016428	tRNA (cytosine-5-)-methyltransferase activity	1	0	0.03	0.80472
GO:0003855	3-dehydroquinate dehydratase activity	1	0	0.03	0.80479
GO:0004764	shikimate 3-dehydrogenase (NADP+) activity	1	0	0.03	0.80479
GO:0051538	3 iron, 4 sulfur cluster binding	2	0	0.07	0.80559
GO:0008172	S-methyltransferase activity	10	1	0.34	0.80622
GO:0016882	cyclo-ligase activity	3	0	0.1	0.80688
GO:0016775	phosphotransferase activity, nitrogenous group as acceptor	26	0	0.89	0.80739
GO:0004673	protein histidine kinase activity	26	0	0.89	0.80739
GO:0008452	RNA ligase activity	2	0	0.07	0.80807
GO:0003972	RNA ligase (ATP) activity	2	0	0.07	0.80807
GO:0004112	cyclic-nucleotide phosphodiesterase activity	2	0	0.07	0.80807
GO:0004113	2',3'-cyclic-nucleotide 3'-phosphodiesterase activity	2	0	0.07	0.80807
GO:0004534	5'-3' exoribonuclease activity	1	0	0.03	0.80809
GO:0008061	chitin binding	17	0	0.58	0.80869
GO:0015166	polyol transmembrane transporter activity	35	1	1.2	0.80951
GO:0060589	nucleoside-triphosphatase regulator activity	44	1	1.51	0.81237
GO:0004105	choline-phosphate cytidylyltransferase activity	3	0	0.1	0.81248
GO:0019136	deoxynucleoside kinase activity	4	0	0.14	0.81528
GO:0001671	ATPase activator activity	3	0	0.1	0.81532
GO:0004048	anthranilate phosphoribosyltransferase activity	2	0	0.07	0.8167
GO:1990189	peptide-serine-N-acetyltransferase activity	1	0	0.03	0.81827
GO:1990190	peptide-glutamate-N-acetyltransferase activity	1	0	0.03	0.81827
GO:0003880	protein C-terminal carboxyl O-methyltransferase activity	2	0	0.07	0.81913
GO:0004671	protein C-terminal S-isoprenylcysteine carboxyl O-methyltransferase activity	2	0	0.07	0.81913
GO:0043531	ADP binding	6	0	0.21	0.81935
GO:0050567	glutaminyl-tRNA synthase (glutamine-hydrolyzing) activity	1	0	0.03	0.81937
GO:0016491	oxidoreductase activity	2028	76	69.73	0.82174
GO:0017056	structural constituent of nuclear pore	8	0	0.28	0.82216
GO:0034061	DNA polymerase activity	67	0	2.3	0.82236
GO:0004774	succinate-CoA ligase activity	2	0	0.07	0.82256
GO:0004775	succinate-CoA ligase (ADP-forming) activity	2	0	0.07	0.82256
GO:0019899	enzyme binding	156	5	5.36	0.8229
GO:0004648	O-phospho-L-serine:2-oxoglutarate aminotransferase activity	2	0	0.07	0.82324
GO:0008878	glucose-1-phosphate adenylyltransferase activity	7	0	0.24	0.82375
GO:0019776	Atg8 ligase activity	2	0	0.07	0.82386
GO:0004617	phosphoglycerate dehydrogenase activity	4	0	0.14	0.82594
GO:0008186	RNA-dependent ATPase activity	75	1	2.58	0.826
GO:0003724	RNA helicase activity	75	1	2.58	0.826
GO:0016813	hydrolase activity, acting on carbon-nitrogen (but not peptide) bonds, in linear amidines	6	0	0.21	0.82669
GO:0033971	hydroxyisourate hydrolase activity	1	0	0.03	0.82787
GO:0015605	organophosphate ester transmembrane transporter activity	22	2	0.76	0.82852
GO:0046961	proton-transporting ATPase activity, rotational mechanism	37	1	1.27	0.82897
GO:0036442	hydrogen-exporting ATPase activity	64	1	2.2	0.82903
GO:0010334	sesquiterpene synthase activity	3	0	0.1	0.82928
GO:0016811	hydrolase activity, acting on carbon-nitrogen (but not peptide) bonds, in linear amides	34	0	1.17	0.82972
GO:0019829	cation-transporting ATPase activity	112	4	3.85	0.83068
GO:0080138	borate uptake transmembrane transporter activity	1	0	0.03	0.83129
GO:0016757	transferase activity, transferring glycosyl groups	484	14	16.64	0.83299
GO:0004742	dihydrolipoyllysine-residue acetyltransferase activity	1	0	0.03	0.83316
GO:0030523	dihydrolipoamide S-acyltransferase activity	1	0	0.03	0.83316
GO:0016418	S-acetyltransferase activity	1	0	0.03	0.83316
GO:0052654	L-leucine transaminase activity	3	0	0.1	0.83327
GO:0052655	L-valine transaminase activity	3	0	0.1	0.83327
GO:0052656	L-isoleucine transaminase activity	3	0	0.1	0.83327
GO:0035252	UDP-xylosyltransferase activity	6	0	0.21	0.8337
GO:0016888	endodeoxyribonuclease activity, producing 5'-phosphomonoesters	4	0	0.14	0.83593
GO:0004420	hydroxymethylglutaryl-CoA reductase (NADPH) activity	2	0	0.07	0.83644
GO:0003916	DNA topoisomerase activity	8	0	0.28	0.83647
GO:0008233	peptidase activity	554	13	19.05	0.83676
GO:0046524	sucrose-phosphate synthase activity	3	0	0.1	0.83714
GO:0032934	sterol binding	4	0	0.14	0.83742
GO:0015485	cholesterol binding	4	0	0.14	0.83742
GO:0050342	tocopherol O-methyltransferase activity	1	0	0.03	0.84018
GO:0004853	uroporphyrinogen decarboxylase activity	1	0	0.03	0.84044
GO:0050321	tau-protein kinase activity	1	0	0.03	0.8411
GO:0018812	3-hydroxyacyl-CoA dehydratase activity	1	0	0.03	0.84241
GO:0008692	3-hydroxybutyryl-CoA epimerase activity	1	0	0.03	0.84241
GO:0016856	racemase and epimerase activity, acting on hydroxy acids and derivatives	1	0	0.03	0.84241
GO:0015108	chloride transmembrane transporter activity	9	0	0.31	0.84246
GO:0050126	N-carbamoylputrescine amidase activity	2	0	0.07	0.84253
GO:0055103	ligase regulator activity	6	0	0.21	0.84323
GO:0055106	ubiquitin-protein transferase regulator activity	6	0	0.21	0.84323
GO:0010997	anaphase-promoting complex binding	6	0	0.21	0.84323
GO:0097027	ubiquitin-protein transferase activator activity	6	0	0.21	0.84323
GO:0016706	oxidoreductase activity, acting on paired donors, with incorporation or reduction of molecular oxygen, 2-oxoglutarate as one donor, and incorporation of one atom each of oxygen into both donors	24	2	0.83	0.84357
GO:0070567	cytidylyltransferase activity	9	0	0.31	0.84377
GO:0043167	ion binding	4490	153	154.38	0.84446
GO:0046914	transition metal ion binding	1115	14	38.34	0.84474
GO:0034062	5'-3' RNA polymerase activity	72	0	2.48	0.845
GO:0016783	sulfurtransferase activity	14	0	0.48	0.84504
GO:0008649	rRNA methyltransferase activity	21	0	0.72	0.8455
GO:0045300	acyl-[acyl-carrier-protein] desaturase activity	6	0	0.21	0.84647
GO:0003899	DNA-directed 5'-3' RNA polymerase activity	71	0	2.44	0.84699
GO:0016603	glutaminyl-peptide cyclotransferase activity	1	0	0.03	0.84703
GO:0016708	oxidoreductase activity, acting on paired donors, with incorporation or reduction of molecular oxygen, NAD(P)H as one donor, and incorporation of two atoms of oxygen into one donor	3	0	0.1	0.84778
GO:0003992	N2-acetyl-L-ornithine:2-oxoglutarate 5-aminotransferase activity	2	0	0.07	0.8479
GO:0004004	ATP-dependent RNA helicase activity	74	1	2.54	0.84823
GO:0008408	3'-5' exonuclease activity	33	1	1.13	0.85046
GO:0005092	GDP-dissociation inhibitor activity	10	1	0.34	0.85056
GO:0005083	GTPase regulator activity	10	1	0.34	0.85056
GO:0004506	squalene monooxygenase activity	7	0	0.24	0.85128
GO:0004619	phosphoglycerate mutase activity	8	0	0.28	0.85198
GO:0004337	geranyltranstransferase activity	6	0	0.21	0.85212
GO:0033947	mannosylglycoprotein endo-beta-mannosidase activity	1	0	0.03	0.85217
GO:0043139	5'-3' DNA helicase activity	3	0	0.1	0.85234
GO:0036459	thiol-dependent ubiquitinyl hydrolase activity	30	0	1.03	0.85292
GO:0008837	diaminopimelate epimerase activity	1	0	0.03	0.85344
GO:0003999	adenine phosphoribosyltransferase activity	4	0	0.14	0.85361
GO:0019202	amino acid kinase activity	11	1	0.38	0.8538
GO:0043141	ATP-dependent 5'-3' DNA helicase activity	2	0	0.07	0.85563
GO:0010333	terpene synthase activity	31	2	1.07	0.85577
GO:0015141	succinate transmembrane transporter activity	1	0	0.03	0.85926
GO:0004088	carbamoyl-phosphate synthase (glutamine-hydrolyzing) activity	2	0	0.07	0.85973
GO:0009041	uridylate kinase activity	5	0	0.17	0.86077
GO:0004826	phenylalanine-tRNA ligase activity	10	0	0.34	0.86077
GO:0008170	N-methyltransferase activity	39	0	1.34	0.86117
GO:0016168	chlorophyll binding	52	0	1.79	0.86158
GO:0033170	protein-DNA loading ATPase activity	5	0	0.17	0.86258
GO:0003689	DNA clamp loader activity	5	0	0.17	0.86258
GO:0002196	Ser-tRNA(Ala) hydrolase activity	1	0	0.03	0.86374
GO:0035514	DNA demethylase activity	1	0	0.03	0.86455
GO:0008194	UDP-glycosyltransferase activity	197	4	6.77	0.86463
GO:0052635	C-20 gibberellin 2-beta-dioxygenase activity	2	0	0.07	0.86535
GO:0004824	lysine-tRNA ligase activity	2	0	0.07	0.86562
GO:0051183	vitamin transporter activity	2	0	0.07	0.86605
GO:0016772	transferase activity, transferring phosphorus-containing groups	1728	49	59.41	0.867
GO:0047918	GDP-mannose 3,5-epimerase activity	1	0	0.03	0.86811
GO:0015215	nucleotide transmembrane transporter activity	13	0	0.45	0.86844
GO:0042349	guiding stereospecific synthesis activity	19	0	0.65	0.86929
GO:0016774	phosphotransferase activity, carboxyl group as acceptor	12	1	0.41	0.86947
GO:0008047	enzyme activator activity	43	0	1.48	0.87009
GO:0003887	DNA-directed DNA polymerase activity	15	0	0.52	0.87046
GO:0031624	ubiquitin conjugating enzyme binding	11	0	0.38	0.87053
GO:0044390	ubiquitin-like protein conjugating enzyme binding	11	0	0.38	0.87053
GO:0033772	flavonoid 3',5'-hydroxylase activity	1	0	0.03	0.87098
GO:0008276	protein methyltransferase activity	30	0	1.03	0.87161
GO:0045543	gibberellin 2-beta-dioxygenase activity	9	0	0.31	0.87253
GO:0016765	transferase activity, transferring alkyl or aryl (other than methyl) groups	104	4	3.58	0.87262
GO:0047443	4-hydroxy-4-methyl-2-oxoglutarate aldolase activity	1	0	0.03	0.87388
GO:0008428	ribonuclease inhibitor activity	1	0	0.03	0.87388
GO:0000149	SNARE binding	46	0	1.58	0.87508
GO:0016779	nucleotidyltransferase activity	211	0	7.25	0.8761
GO:0004611	phosphoenolpyruvate carboxykinase activity	10	1	0.34	0.87642
GO:0046030	inositol trisphosphate phosphatase activity	2	0	0.07	0.87668
GO:0016971	flavin-linked sulfhydryl oxidase activity	1	0	0.03	0.87669
GO:0016743	carboxyl- or carbamoyltransferase activity	3	0	0.1	0.87919
GO:0016301	kinase activity	1482	48	50.95	0.87923
GO:0045431	flavonol synthase activity	2	0	0.07	0.87924
GO:0009679	hexose:proton symporter activity	3	0	0.1	0.88022
GO:0005356	hydrogen:glucose symporter activity	3	0	0.1	0.88022
GO:0005358	high-affinity hydrogen:glucose symporter activity	3	0	0.1	0.88022
GO:0003839	gamma-glutamylcyclotransferase activity	1	0	0.03	0.88265
GO:0005484	SNAP receptor activity	43	1	1.48	0.88275
GO:0004455	ketol-acid reductoisomerase activity	1	0	0.03	0.88318
GO:0046790	virion binding	2	0	0.07	0.88318
GO:0008460	dTDP-glucose 4,6-dehydratase activity	2	0	0.07	0.88363
GO:0016857	racemase and epimerase activity, acting on carbohydrates and derivatives	23	2	0.79	0.88425
GO:0008517	folic acid transporter activity	1	0	0.03	0.88451
GO:0015350	methotrexate transporter activity	1	0	0.03	0.88451
GO:0015231	5-formyltetrahydrofolate transporter activity	1	0	0.03	0.88451
GO:0008187	poly-pyrimidine tract binding	5	0	0.17	0.88489
GO:0016781	phosphotransferase activity, paired acceptors	3	0	0.1	0.88531
GO:0047220	galactosylxylosylprotein 3-beta-galactosyltransferase activity	1	0	0.03	0.88533
GO:0004401	histidinol-phosphatase activity	2	0	0.07	0.88589
GO:0030366	molybdopterin synthase activity	2	0	0.07	0.88784
GO:0016812	hydrolase activity, acting on carbon-nitrogen (but not peptide) bonds, in cyclic amides	7	0	0.24	0.88832
GO:0051015	actin filament binding	9	0	0.31	0.88935
GO:0008676	3-deoxy-8-phosphooctulonate synthase activity	2	0	0.07	0.89063
GO:0008446	GDP-mannose 4,6-dehydratase activity	1	0	0.03	0.89072
GO:0045430	chalcone isomerase activity	1	0	0.03	0.89106
GO:0032050	clathrin heavy chain binding	2	0	0.07	0.89219
GO:0051011	microtubule minus-end binding	7	0	0.24	0.89357
GO:0042393	histone binding	22	0	0.76	0.89423
GO:0004595	pantetheine-phosphate adenylyltransferase activity	1	0	0.03	0.89528
GO:0030627	pre-mRNA 5'-splice site binding	2	0	0.07	0.89568
GO:0046027	phospholipid:diacylglycerol acyltransferase activity	2	0	0.07	0.89572
GO:0030410	nicotianamine synthase activity	3	0	0.1	0.89699
GO:0008802	betaine-aldehyde dehydrogenase activity	1	0	0.03	0.89705
GO:0016782	transferase activity, transferring sulfur-containing groups	22	0	0.76	0.89817
GO:0008270	zinc ion binding	655	5	22.52	0.89842
GO:0000309	nicotinamide-nucleotide adenylyltransferase activity	1	0	0.03	0.89844
GO:0004515	nicotinate-nucleotide adenylyltransferase activity	1	0	0.03	0.89844
GO:0004815	aspartate-tRNA ligase activity	2	0	0.07	0.89889
GO:0008864	formyltetrahydrofolate deformylase activity	4	0	0.14	0.89891
GO:0004644	phosphoribosylglycinamide formyltransferase activity	4	0	0.14	0.89891
GO:0004175	endopeptidase activity	303	5	10.42	0.89898
GO:0044183	protein binding involved in protein folding	1	0	0.03	0.90003
GO:0016002	sulfite reductase activity	1	0	0.03	0.9015
GO:0030623	U5 snRNA binding	3	0	0.1	0.90287
GO:0004674	protein serine/threonine kinase activity	551	21	18.94	0.90384
GO:0004797	thymidine kinase activity	3	0	0.1	0.90433
GO:0004176	ATP-dependent peptidase activity	30	0	1.03	0.90434
GO:0050589	leucocyanidin oxygenase activity	1	0	0.03	0.90597
GO:0005496	steroid binding	5	0	0.17	0.90678
GO:0008266	poly(U) RNA binding	4	0	0.14	0.90681
GO:0033218	amide binding	37	1	1.27	0.90717
GO:0005488	binding	8553	256	294.07	0.9073
GO:0015205	nucleobase transmembrane transporter activity	5	0	0.17	0.90784
GO:0043015	gamma-tubulin binding	6	0	0.21	0.90806
GO:0016831	carboxy-lyase activity	101	3	3.47	0.90922
GO:0016822	hydrolase activity, acting on acid carbon-carbon bonds	1	0	0.03	0.90947
GO:0016823	hydrolase activity, acting on acid carbon-carbon bonds, in ketonic substances	1	0	0.03	0.90947
GO:0004334	fumarylacetoacetase activity	1	0	0.03	0.90947
GO:0016508	long-chain-enoyl-CoA hydratase activity	1	0	0.03	0.90973
GO:0046923	ER retention sequence binding	8	0	0.28	0.91074
GO:0004660	protein farnesyltransferase activity	3	0	0.1	0.91075
GO:0003725	double-stranded RNA binding	6	0	0.21	0.91368
GO:0017108	5'-flap endonuclease activity	2	0	0.07	0.9143
GO:0048256	flap endonuclease activity	2	0	0.07	0.9143
GO:0010521	telomerase inhibitor activity	1	0	0.03	0.9146
GO:0016872	intramolecular lyase activity	10	0	0.34	0.91575
GO:0061597	obsolete cyclic pyranopterin monophosphate synthase activity	1	0	0.03	0.91679
GO:0009977	proton motive force dependent protein transmembrane transporter activity	2	0	0.07	0.9169
GO:0008308	voltage-gated anion channel activity	19	0	0.65	0.9173
GO:0005253	anion channel activity	19	0	0.65	0.9173
GO:0004749	ribose phosphate diphosphokinase activity	2	0	0.07	0.91804
GO:0001054	RNA polymerase I activity	19	0	0.65	0.91906
GO:0010488	UDP-galactose:N-glycan beta-1,3-galactosyltransferase activity	1	0	0.03	0.9192
GO:0003964	RNA-directed DNA polymerase activity	50	0	1.72	0.91928
GO:0051740	ethylene binding	4	0	0.14	0.91929
GO:0072328	alkene binding	4	0	0.14	0.91929
GO:0034618	arginine binding	1	0	0.03	0.9195
GO:0003991	acetylglutamate kinase activity	1	0	0.03	0.9195
GO:0003923	GPI-anchor transamidase activity	3	0	0.1	0.91977
GO:0003985	acetyl-CoA C-acetyltransferase activity	3	0	0.1	0.92043
GO:0003988	acetyl-CoA C-acyltransferase activity	3	0	0.1	0.92043
GO:0016453	C-acetyltransferase activity	3	0	0.1	0.92043
GO:0016408	C-acyltransferase activity	3	0	0.1	0.92043
GO:0003867	4-aminobutyrate transaminase activity	1	0	0.03	0.92065
GO:0004252	serine-type endopeptidase activity	111	2	3.82	0.92313
GO:0001077	transcriptional activator activity, RNA polymerase II core promoter proximal region sequence-specific binding	5	0	0.17	0.92409
GO:0015131	oxaloacetate transmembrane transporter activity	2	0	0.07	0.92419
GO:0005345	purine nucleobase transmembrane transporter activity	4	0	0.14	0.92557
GO:0016791	phosphatase activity	276	10	9.49	0.92616
GO:0004640	phosphoribosylanthranilate isomerase activity	2	0	0.07	0.92624
GO:0019210	kinase inhibitor activity	4	0	0.14	0.92721
GO:0004605	phosphatidate cytidylyltransferase activity	4	0	0.14	0.9273
GO:0019206	nucleoside kinase activity	20	0	0.69	0.92757
GO:0004821	histidine-tRNA ligase activity	1	0	0.03	0.92827
GO:0004860	protein kinase inhibitor activity	3	0	0.1	0.92847
GO:0008281	sulfonylurea receptor activity	1	0	0.03	0.92983
GO:0015229	L-ascorbic acid transporter activity	1	0	0.03	0.93062
GO:0030785	[ribulose-bisphosphate carboxylase]-lysine N-methyltransferase activity	2	0	0.07	0.93073
GO:0042277	peptide binding	32	0	1.1	0.931
GO:0047793	cycloeucalenol cycloisomerase activity	2	0	0.07	0.93103
GO:0043022	ribosome binding	21	0	0.72	0.93208
GO:0033819	lipoyl(octanoyl) transferase activity	1	0	0.03	0.93391
GO:0016769	transferase activity, transferring nitrogenous groups	54	0	1.86	0.93421
GO:0008483	transaminase activity	54	0	1.86	0.93421
GO:0003934	GTP cyclohydrolase I activity	1	0	0.03	0.93427
GO:0004813	alanine-tRNA ligase activity	3	0	0.1	0.9349
GO:0051082	unfolded protein binding	80	2	2.75	0.93497
GO:0004659	prenyltransferase activity	28	0	0.96	0.93559
GO:0016879	ligase activity, forming carbon-nitrogen bonds	69	3	2.37	0.93563
GO:0016597	amino acid binding	45	2	1.55	0.93584
GO:0016758	transferase activity, transferring hexosyl groups	304	9	10.45	0.93638
GO:0008757	S-adenosylmethionine-dependent methyltransferase activity	136	3	4.68	0.93713
GO:0031369	translation initiation factor binding	9	0	0.31	0.93813
GO:0004075	biotin carboxylase activity	4	0	0.14	0.93864
GO:0005048	signal sequence binding	28	0	0.96	0.93937
GO:0008465	glycerate dehydrogenase activity	1	0	0.03	0.94139
GO:0004034	aldose 1-epimerase activity	1	0	0.03	0.94161
GO:0070566	adenylyltransferase activity	14	0	0.48	0.94187
GO:0051724	NAD transporter activity	1	0	0.03	0.94269
GO:0003735	structural constituent of ribosome	500	5	17.19	0.9429
GO:0003950	NAD+ ADP-ribosyltransferase activity	9	0	0.31	0.94293
GO:0004418	hydroxymethylbilane synthase activity	2	0	0.07	0.94332
GO:0010291	carotene beta-ring hydroxylase activity	1	0	0.03	0.94337
GO:0070290	N-acylphosphatidylethanolamine-specific phospholipase D activity	7	0	0.24	0.94433
GO:0004630	phospholipase D activity	7	0	0.24	0.94433
GO:0008353	RNA polymerase II carboxy-terminal domain kinase activity	6	0	0.21	0.94437
GO:0004386	helicase activity	188	3	6.46	0.94453
GO:0005544	calcium-dependent phospholipid binding	21	1	0.72	0.94536
GO:0030570	pectate lyase activity	24	1	0.83	0.946
GO:0016837	carbon-oxygen lyase activity, acting on polysaccharides	24	1	0.83	0.946
GO:0004729	oxygen-dependent protoporphyrinogen oxidase activity	4	0	0.14	0.94619
GO:0070818	protoporphyrinogen oxidase activity	4	0	0.14	0.94619
GO:0052852	very-long-chain-(S)-2-hydroxy-acid oxidase activity	1	0	0.03	0.94678
GO:0052853	long-chain-(S)-2-hydroxy-long-chain-acid oxidase activity	1	0	0.03	0.94678
GO:0052854	medium-chain-(S)-2-hydroxy-acid oxidase activity	1	0	0.03	0.94678
GO:0016992	lipoate synthase activity	4	0	0.14	0.947
GO:0016979	lipoate-protein ligase activity	4	0	0.14	0.947
GO:0016174	NAD(P)H oxidase activity	3	0	0.1	0.94738
GO:0004721	phosphoprotein phosphatase activity	169	6	5.81	0.94763
GO:0008777	acetylornithine deacetylase activity	1	0	0.03	0.94769
GO:0004703	G-protein coupled receptor kinase activity	3	0	0.1	0.94906
GO:0016705	oxidoreductase activity, acting on paired donors, with incorporation or reduction of molecular oxygen	321	7	11.04	0.94944
GO:0004612	phosphoenolpyruvate carboxykinase (ATP) activity	4	0	0.14	0.94964
GO:0004430	1-phosphatidylinositol 4-kinase activity	1	0	0.03	0.95021
GO:0030060	L-malate dehydrogenase activity	17	0	0.58	0.95049
GO:0005254	chloride channel activity	7	0	0.24	0.9508
GO:0005247	voltage-gated chloride channel activity	7	0	0.24	0.9508
GO:0070063	RNA polymerase binding	2	0	0.07	0.95081
GO:0043175	RNA polymerase core enzyme binding	2	0	0.07	0.95081
GO:0097506	deaminated base DNA N-glycosylase activity	1	0	0.03	0.9511
GO:0004844	uracil DNA N-glycosylase activity	1	0	0.03	0.9511
GO:0008173	RNA methyltransferase activity	47	0	1.62	0.95124
GO:0016740	transferase activity	3668	111	126.11	0.95173
GO:0015020	glucuronosyltransferase activity	5	0	0.17	0.95275
GO:0030942	endoplasmic reticulum signal peptide binding	6	0	0.21	0.95309
GO:0050619	phytochromobilin:ferredoxin oxidoreductase activity	2	0	0.07	0.95333
GO:0016636	oxidoreductase activity, acting on the CH-CH group of donors, iron-sulfur protein as acceptor	2	0	0.07	0.95333
GO:0003861	3-isopropylmalate dehydratase activity	1	0	0.03	0.9535
GO:0032266	phosphatidylinositol-3-phosphate binding	4	0	0.14	0.95382
GO:1901981	phosphatidylinositol phosphate binding	4	0	0.14	0.95382
GO:0016861	intramolecular oxidoreductase activity, interconverting aldoses and ketoses	23	0	0.79	0.95393
GO:0005347	ATP transmembrane transporter activity	5	0	0.17	0.95441
GO:0015217	ADP transmembrane transporter activity	5	0	0.17	0.95441
GO:0060090	binding, bridging	3	0	0.1	0.95554
GO:0030674	protein binding, bridging	3	0	0.1	0.95554
GO:0008146	sulfotransferase activity	6	0	0.21	0.95645
GO:0016632	oxidoreductase activity, acting on the CH-CH group of donors, cytochrome as acceptor	1	0	0.03	0.95687
GO:0016633	galactonolactone dehydrogenase activity	1	0	0.03	0.95687
GO:0080049	L-gulono-1,4-lactone dehydrogenase activity	1	0	0.03	0.95687
GO:0042285	xylosyltransferase activity	10	0	0.34	0.95705
GO:0043169	cation binding	2544	77	87.47	0.95743
GO:0005049	nuclear export signal receptor activity	4	0	0.14	0.95758
GO:0010309	acireductone dioxygenase [iron(II)-requiring] activity	3	0	0.1	0.9579
GO:0004585	ornithine carbamoyltransferase activity	1	0	0.03	0.958
GO:0004497	monooxygenase activity	304	6	10.45	0.95856
GO:0005198	structural molecule activity	564	7	19.39	0.95878
GO:0038199	ethylene receptor activity	2	0	0.07	0.9588
GO:0005507	copper ion binding	123	2	4.23	0.95884
GO:0004425	indole-3-glycerol-phosphate synthase activity	1	0	0.03	0.9598
GO:0047654	alliin lyase activity	1	0	0.03	0.95987
GO:0003727	single-stranded RNA binding	11	0	0.38	0.96012
GO:0046537	2,3-bisphosphoglycerate-independent phosphoglycerate mutase activity	2	0	0.07	0.96076
GO:0008175	tRNA methyltransferase activity	23	0	0.79	0.96081
GO:0015139	alpha-ketoglutarate transmembrane transporter activity	1	0	0.03	0.96135
GO:0004314	[acyl-carrier-protein] S-malonyltransferase activity	1	0	0.03	0.9615
GO:0016420	malonyltransferase activity	1	0	0.03	0.9615
GO:0016419	S-malonyltransferase activity	1	0	0.03	0.9615
GO:0016290	palmitoyl-CoA hydrolase activity	1	0	0.03	0.96153
GO:0047617	acyl-CoA hydrolase activity	1	0	0.03	0.96153
GO:0003993	acid phosphatase activity	22	0	0.76	0.96198
GO:0004526	ribonuclease P activity	12	0	0.41	0.96227
GO:0016874	ligase activity	306	14	10.52	0.96227
GO:0043023	ribosomal large subunit binding	4	0	0.14	0.9628
GO:0005515	protein binding	1029	32	35.38	0.96315
GO:0016722	oxidoreductase activity, oxidizing metal ions	57	2	1.96	0.96388
GO:0097602	cullin family protein binding	4	0	0.14	0.96417
GO:0017050	D-erythro-sphingosine kinase activity	1	0	0.03	0.9642
GO:0001056	RNA polymerase III activity	15	0	0.52	0.96433
GO:0010283	pinoresinol reductase activity	1	0	0.03	0.96451
GO:0010284	lariciresinol reductase activity	1	0	0.03	0.96451
GO:0016763	transferase activity, transferring pentosyl groups	42	0	1.44	0.96497
GO:0047652	allantoate deiminase activity	1	0	0.03	0.9655
GO:0004560	alpha-L-fucosidase activity	4	0	0.14	0.96569
GO:0015928	fucosidase activity	4	0	0.14	0.96569
GO:0052742	phosphatidylinositol kinase activity	3	0	0.1	0.9666
GO:0004038	allantoinase activity	2	0	0.07	0.96674
GO:0004845	uracil phosphoribosyltransferase activity	2	0	0.07	0.96726
GO:0004512	inositol-3-phosphate synthase activity	1	0	0.03	0.9677
GO:0008515	sucrose transmembrane transporter activity	4	0	0.14	0.96854
GO:0015154	disaccharide transmembrane transporter activity	4	0	0.14	0.96854
GO:0015157	oligosaccharide transmembrane transporter activity	4	0	0.14	0.96854
GO:0080116	glucuronoxylan glucuronosyltransferase activity	1	0	0.03	0.96855
GO:0030337	DNA polymerase processivity factor activity	1	0	0.03	0.96907
GO:0001046	core promoter sequence-specific DNA binding	10	0	0.34	0.96959
GO:0001047	core promoter binding	10	0	0.34	0.96959
GO:0050311	sulfite reductase (ferredoxin) activity	2	0	0.07	0.96978
GO:0016673	oxidoreductase activity, acting on a sulfur group of donors, iron-sulfur protein as acceptor	2	0	0.07	0.96978
GO:0047213	anthocyanidin 3-O-glucosyltransferase activity	1	0	0.03	0.96983
GO:0008395	steroid hydroxylase activity	2	0	0.07	0.97019
GO:0004647	phosphoserine phosphatase activity	1	0	0.03	0.97031
GO:0005094	Rho GDP-dissociation inhibitor activity	7	0	0.24	0.97091
GO:0016760	cellulose synthase (UDP-forming) activity	22	0	0.76	0.97166
GO:0015929	hexosaminidase activity	2	0	0.07	0.97186
GO:0051752	phosphoglucan, water dikinase activity	1	0	0.03	0.97214
GO:2001070	starch binding	1	0	0.03	0.97214
GO:0008478	pyridoxal kinase activity	1	0	0.03	0.97236
GO:0004848	ureidoglycolate hydrolase activity	1	0	0.03	0.97242
GO:0046523	S-methyl-5-thioribose-1-phosphate isomerase activity	5	0	0.17	0.9725
GO:0004733	pyridoxamine-phosphate oxidase activity	2	0	0.07	0.97273
GO:0030613	oxidoreductase activity, acting on phosphorus or arsenic in donors	1	0	0.03	0.97278
GO:0030614	oxidoreductase activity, acting on phosphorus or arsenic in donors, disulfide as acceptor	1	0	0.03	0.97278
GO:0008794	arsenate reductase (glutaredoxin) activity	1	0	0.03	0.97278
GO:0046872	metal ion binding	2500	75	85.96	0.97313
GO:0042736	NADH kinase activity	1	0	0.03	0.9736
GO:0003951	NAD+ kinase activity	1	0	0.03	0.9736
GO:0004856	xylulokinase activity	3	0	0.1	0.97406
GO:0003678	DNA helicase activity	31	0	1.07	0.97414
GO:0004084	branched-chain-amino-acid transaminase activity	6	0	0.21	0.9743
GO:0001228	transcriptional activator activity, RNA polymerase II transcription regulatory region sequence-specific binding	25	0	0.86	0.97438
GO:0019843	rRNA binding	140	2	4.81	0.97461
GO:0004550	nucleoside diphosphate kinase activity	5	0	0.17	0.97503
GO:0001098	basal transcription machinery binding	1	0	0.03	0.9751
GO:0001099	basal RNA polymerase II transcription machinery binding	1	0	0.03	0.9751
GO:0000993	RNA polymerase II core binding	1	0	0.03	0.9751
GO:0019203	carbohydrate phosphatase activity	13	0	0.45	0.9753
GO:0016710	trans-cinnamate 4-monooxygenase activity	3	0	0.1	0.97594
GO:0004657	proline dehydrogenase activity	1	0	0.03	0.97622
GO:0017069	snRNA binding	15	0	0.52	0.9768
GO:0051903	S-(hydroxymethyl)glutathione dehydrogenase activity	1	0	0.03	0.97698
GO:0004837	tyrosine decarboxylase activity	4	0	0.14	0.97737
GO:0004722	protein serine/threonine phosphatase activity	65	3	2.23	0.97744
GO:0004825	methionine-tRNA ligase activity	2	0	0.07	0.97764
GO:0080123	jasmonate-amino synthetase activity	1	0	0.03	0.97783
GO:0003952	NAD+ synthase (glutamine-hydrolyzing) activity	2	0	0.07	0.97841
GO:0009045	xylose isomerase activity	1	0	0.03	0.97862
GO:0015415	ATPase-coupled phosphate ion transmembrane transporter activity	1	0	0.03	0.97924
GO:0000026	alpha-1,2-mannosyltransferase activity	1	0	0.03	0.98003
GO:0003824	catalytic activity	9648	348	331.72	0.98028
GO:0008193	tRNA guanylyltransferase activity	1	0	0.03	0.9805
GO:0016709	oxidoreductase activity, acting on paired donors, with incorporation or reduction of molecular oxygen, NAD(P)H as one donor, and incorporation of one atom of oxygen	104	0	3.58	0.9806
GO:0015018	galactosylgalactosylxylosylprotein 3-beta-glucuronosyltransferase activity	2	0	0.07	0.98083
GO:0009670	triose-phosphate:phosphate antiporter activity	1	0	0.03	0.98134
GO:0071917	triose-phosphate transmembrane transporter activity	1	0	0.03	0.98134
GO:0016707	gibberellin 3-beta-dioxygenase activity	2	0	0.07	0.98151
GO:0030272	5-formyltetrahydrofolate cyclo-ligase activity	1	0	0.03	0.98156
GO:0005542	folic acid binding	1	0	0.03	0.98214
GO:0047513	1,2-alpha-L-fucosidase activity	2	0	0.07	0.9827
GO:0051139	metal ion:proton antiporter activity	7	0	0.24	0.98275
GO:0004040	amidase activity	2	0	0.07	0.98304
GO:0008318	protein prenyltransferase activity	7	0	0.24	0.98352
GO:0052736	beta-glucanase activity	1	0	0.03	0.98401
GO:0004751	ribose-5-phosphate isomerase activity	5	0	0.17	0.98406
GO:0033984	indole-3-glycerol-phosphate lyase activity	1	0	0.03	0.98445
GO:0047196	long-chain-alcohol O-fatty-acyltransferase activity	6	0	0.21	0.98459
GO:0004576	oligosaccharyl transferase activity	6	0	0.21	0.98514
GO:0004579	dolichyl-diphosphooligosaccharide-protein glycotransferase activity	6	0	0.21	0.98514
GO:0005085	guanyl-nucleotide exchange factor activity	24	3	0.83	0.9852
GO:0015369	calcium:proton antiporter activity	6	0	0.21	0.9852
GO:0004413	homoserine kinase activity	1	0	0.03	0.98574
GO:0016759	cellulose synthase activity	23	0	0.79	0.98577
GO:0004563	beta-N-acetylhexosaminidase activity	1	0	0.03	0.98583
GO:0008836	diaminopimelate decarboxylase activity	1	0	0.03	0.98592
GO:0004633	phosphopantothenoylcysteine decarboxylase activity	2	0	0.07	0.98619
GO:0000107	imidazoleglycerol-phosphate synthase activity	2	0	0.07	0.98625
GO:0004364	glutathione transferase activity	33	0	1.13	0.98655
GO:0050308	sugar-phosphatase activity	7	0	0.24	0.98663
GO:0001888	glucuronyl-galactosyl-proteoglycan 4-alpha-N-acetylglucosaminyltransferase activity	1	0	0.03	0.98681
GO:0034256	chlorophyll(ide) b reductase activity	1	0	0.03	0.9875
GO:0004161	dimethylallyltranstransferase activity	3	0	0.1	0.98852
GO:0042132	fructose 1,6-bisphosphate 1-phosphatase activity	6	0	0.21	0.98853
GO:0004842	ubiquitin-protein transferase activity	206	4	7.08	0.98891
GO:0010307	acetylglutamate kinase regulator activity	1	0	0.03	0.98891
GO:0004846	urate oxidase activity	5	0	0.17	0.98895
GO:0016663	oxidoreductase activity, acting on other nitrogenous compounds as donors, oxygen as acceptor	5	0	0.17	0.98895
GO:0003949	1-(5-phosphoribosyl)-5-[(5-phosphoribosylamino)methylideneamino]imidazole-4-carboxamide isomerase activity	1	0	0.03	0.98928
GO:0016307	phosphatidylinositol phosphate kinase activity	9	0	0.31	0.9894
GO:0004869	cysteine-type endopeptidase inhibitor activity	3	0	0.1	0.98972
GO:0042578	phosphoric ester hydrolase activity	329	11	11.31	0.99002
GO:0036002	pre-mRNA binding	7	0	0.24	0.99019
GO:0016884	carbon-nitrogen ligase activity, with glutamine as amido-N-donor	28	1	0.96	0.99038
GO:0004661	protein geranylgeranyltransferase activity	4	0	0.14	0.99055
GO:0000990	transcription factor activity, core RNA polymerase binding	7	0	0.24	0.99095
GO:0032182	ubiquitin-like protein binding	21	0	0.72	0.99101
GO:0047641	aldose-6-phosphate reductase (NADPH) activity	2	0	0.07	0.99121
GO:0004635	phosphoribosyl-AMP cyclohydrolase activity	1	0	0.03	0.99157
GO:0004636	phosphoribosyl-ATP diphosphatase activity	1	0	0.03	0.99157
GO:0050614	delta24-sterol reductase activity	1	0	0.03	0.99161
GO:0000224	peptide-N4-(N-acetyl-beta-glucosaminyl)asparagine amidase activity	1	0	0.03	0.99176
GO:0004618	phosphoglycerate kinase activity	1	0	0.03	0.99216
GO:0046982	protein heterodimerization activity	117	3	4.02	0.9922
GO:0004311	farnesyltranstransferase activity	2	0	0.07	0.99234
GO:0004001	adenosine kinase activity	2	0	0.07	0.99252
GO:0016984	ribulose-bisphosphate carboxylase activity	13	0	0.45	0.99317
GO:0044540	L-cystine L-cysteine-lyase (deaminating)	1	0	0.03	0.99319
GO:0080146	L-cysteine desulfhydrase activity	1	0	0.03	0.99319
GO:0004123	cystathionine gamma-lyase activity	1	0	0.03	0.99319
GO:0004568	chitinase activity	19	0	0.65	0.99361
GO:0052636	arabinosyltransferase activity	1	0	0.03	0.99388
GO:0019140	inositol 3-kinase activity	1	0	0.03	0.99397
GO:0043130	ubiquitin binding	20	0	0.69	0.99399
GO:0004819	glutamine-tRNA ligase activity	2	0	0.07	0.99425
GO:0061630	ubiquitin protein ligase activity	104	2	3.58	0.99442
GO:0050152	omega-amidase activity	1	0	0.03	0.99454
GO:0016854	racemase and epimerase activity	34	2	1.17	0.99474
GO:0050291	sphingosine N-acyltransferase activity	1	0	0.03	0.99481
GO:0004663	Rab geranylgeranyltransferase activity	2	0	0.07	0.99526
GO:0004834	tryptophan synthase activity	2	0	0.07	0.99581
GO:0008466	glycogenin glucosyltransferase activity	1	0	0.03	0.99604
GO:0042054	histone methyltransferase activity	12	0	0.41	0.99609
GO:0004133	glycogen debranching enzyme activity	1	0	0.03	0.99656
GO:0004134	4-alpha-glucanotransferase activity	1	0	0.03	0.99656
GO:0004776	succinate-CoA ligase (GDP-forming) activity	1	0	0.03	0.9966
GO:0003862	3-isopropylmalate dehydrogenase activity	1	0	0.03	0.99676
GO:0008430	selenium binding	2	0	0.07	0.99679
GO:0042301	phosphate ion binding	3	0	0.1	0.9968
GO:0003680	AT DNA binding	3	0	0.1	0.99703
GO:0003796	lysozyme activity	2	0	0.07	0.99711
GO:0071424	rRNA (cytosine-N4-)-methyltransferase activity	1	0	0.03	0.9973
GO:0016434	rRNA (cytosine) methyltransferase activity	1	0	0.03	0.9973
GO:0008898	S-adenosylmethionine-homocysteine S-methyltransferase activity	2	0	0.07	0.99755
GO:0051087	chaperone binding	17	0	0.58	0.99771
GO:0016530	metallochaperone activity	3	0	0.1	0.99774
GO:0010491	UTP:arabinose-1-phosphate uridylyltransferase activity	1	0	0.03	0.99796
GO:0017103	UTP:galactose-1-phosphate uridylyltransferase activity	1	0	0.03	0.99796
GO:0047350	glucuronate-1-phosphate uridylyltransferase activity	1	0	0.03	0.99796
[truncated: 58 more rows]
