# Supplementary material for: Transcriptomic and Proteomic Analyses of Celery Cytoplasmic Male Sterile Line and Its Maintainer Line
Source: Int J Mol Sci. 2023 Feb 20;24(4):4194. doi: 10.3390/ijms24044194 (PMC9967367; doi:10.3390/ijms24044194)
Supplement: Supplementary file 1 [file ijms-24-04194-s001.zip › Table S4.xlsx]

## Sheet: kegg_pathway_enrich
Table S4. KEGG pathways associated with the 1069 DEGs in the transcriptome
#Kegg_pathway	ko_id	DEG	Gene	DEG_all	Gene_all	Cluter_frequency	Genome_frequency	P-value	Corrected_P-value	geneID
Phenylalanine metabolism	ko00360	9	60	196	7761	9 out of 196 4.59183673469388%	60 out of 7761 0.773096250483185%	1.68739e-05	0.00145115	EVM0001394;EVM0001985;EVM0007563;EVM0011071;EVM0012950;EVM0014436;EVM0033263;EVM0034117;EVM0041100
Phenylpropanoid biosynthesis	ko00940	20	295	196	7761	20 out of 196 10.2040816326531%	295 out of 7761 3.80105656487566%	5.12001e-05	0.00440321	EVM0001394;EVM0001985;EVM0005288;EVM0007563;EVM0008529;EVM0011071;EVM0011414;EVM0014167;EVM0014436;EVM0017069;EVM0023534;EVM0024715;EVM0028886;EVM0033263;EVM0034117;EVM0035318;EVM0041100;EVM0041849;EVM0042066;EVM0044993
Starch and sucrose metabolism	ko00500	23	414	196	7761	23 out of 196 11.734693877551%	414 out of 7761 5.33436412833398%	0.000289023	0.024856	EVM0003935;EVM0004586;EVM0005220;EVM0007231;EVM0008227;EVM0012271;EVM0016881;EVM0017069;EVM0020680;EVM0023697;EVM0025387;EVM0029923;EVM0031423;EVM0032241;EVM0033614;EVM0035432;EVM0035496;EVM0037189;EVM0037354;EVM0041144;EVM0041849;EVM0042246;EVM0042416
Flavonoid biosynthesis	ko00941	7	55	196	7761	7 out of 196 3.57142857142857%	55 out of 7761 0.70867156294292%	0.000427709	0.0367829	EVM0011071;EVM0011414;EVM0024156;EVM0024931;EVM0028886;EVM0034117;EVM0036390
Cutin, suberine and wax biosynthesis	ko00073	7	59	196	7761	7 out of 196 3.57142857142857%	59 out of 7761 0.760211312975132%	0.000660399	0.0567943	Apium_graveolens_newGene_8389;EVM0001091;EVM0007622;EVM0020435;EVM0021959;EVM0022449;EVM0030182
Amino sugar and nucleotide sugar metabolism	ko00520	12	184	196	7761	12 out of 196 6.12244897959184%	184 out of 7761 2.37082850148177%	0.00235262	0.202325	EVM0004586;EVM0007231;EVM0009918;EVM0016881;EVM0021081;EVM0025387;EVM0030322;EVM0031423;EVM0032241;EVM0033614;EVM0037354;EVM0041144
Stilbenoid, diarylheptanoid and gingerol biosynthesis	ko00945	4	35	196	7761	4 out of 196 2.04081632653061%	35 out of 7761 0.450972812781858%	0.0111998	0.963184	EVM0011071;EVM0011414;EVM0028886;EVM0034117
Glycolysis / Gluconeogenesis	ko00010	12	241	196	7761	12 out of 196 6.12244897959184%	241 out of 7761 3.10526993944079%	0.0188569	1	EVM0000599;EVM0004147;EVM0004586;EVM0005623;EVM0009399;EVM0016077;EVM0018101;EVM0019396;EVM0020918;EVM0032948;EVM0033614;EVM0043490
Fructose and mannose metabolism	ko00051	6	91	196	7761	6 out of 196 3.06122448979592%	91 out of 7761 1.17252931323283%	0.0272158	1	EVM0004586;EVM0007231;EVM0023846;EVM0025561;EVM0031423;EVM0033614
Ubiquinone and other terpenoid-quinone biosynthesis	ko00130	5	68	196	7761	5 out of 196 2.55102040816327%	68 out of 7761 0.87617575054761%	0.0282094	1	EVM0001394;EVM0001985;EVM0007563;EVM0014436;EVM0033263
Steroid biosynthesis	ko00100	4	51	196	7761	4 out of 196 2.04081632653061%	51 out of 7761 0.657131812910707%	0.0392107	1	EVM0002425;EVM0002480;EVM0005815;EVM0031649
Tryptophan metabolism	ko00380	4	53	196	7761	4 out of 196 2.04081632653061%	53 out of 7761 0.682901687926814%	0.044215	1	EVM0000599;EVM0011230;EVM0012950;EVM0044311
Ascorbate and aldarate metabolism	ko00053	4	61	196	7761	4 out of 196 2.04081632653061%	61 out of 7761 0.785981187991238%	0.0676292	1	EVM0000599;EVM0004150;EVM0024441;EVM0043570
Glycerolipid metabolism	ko00561	6	117	196	7761	6 out of 196 3.06122448979592%	117 out of 7761 1.50753768844221%	0.0753478	1	EVM0000599;EVM0010538;EVM0011407;EVM0013836;EVM0031656;EVM0036053
Galactose metabolism	ko00052	5	90	196	7761	5 out of 196 2.55102040816327%	90 out of 7761 1.15964437572478%	0.0769191	1	EVM0004586;EVM0019396;EVM0030322;EVM0033614;EVM0035432
Selenocompound metabolism	ko00450	3	40	196	7761	3 out of 196 1.53061224489796%	40 out of 7761 0.515397500322123%	0.0793238	1	Apium_graveolens_newGene_4421;Apium_graveolens_newGene_4422;EVM0018106
Arginine and proline metabolism	ko00330	5	91	196	7761	5 out of 196 2.55102040816327%	91 out of 7761 1.17252931323283%	0.0798088	1	EVM0000599;EVM0012950;EVM0026793;EVM0032600;EVM0039311
Fatty acid degradation	ko00071	5	92	196	7761	5 out of 196 2.55102040816327%	92 out of 7761 1.18541425074088%	0.0827561	1	EVM0000599;EVM0004147;EVM0013940;EVM0024570;EVM0032948
ABC transporters	ko02010	3	41	196	7761	3 out of 196 1.53061224489796%	41 out of 7761 0.528282437830176%	0.0840645	1	EVM0000736;EVM0020655;EVM0029822
AGE-RAGE signaling pathway in diabetic complications	ko04933	2	20	196	7761	2 out of 196 1.02040816326531%	20 out of 7761 0.257698750161062%	0.089575	1	EVM0002084;EVM0041417
RNA transport	ko03013	11	276	196	7761	11 out of 196 5.61224489795918%	276 out of 7761 3.55624275222265%	0.0898651	1	EVM0000584;EVM0001870;EVM0002903;EVM0003806;EVM0011089;EVM0011958;EVM0015587;EVM0015643;EVM0018341;EVM0028815;EVM0044028
Zeatin biosynthesis	ko00908	3	44	196	7761	3 out of 196 1.53061224489796%	44 out of 7761 0.566937250354336%	0.0989851	1	EVM0007330;EVM0031970;EVM0044202
Peroxisome	ko04146	7	157	196	7761	7 out of 196 3.57142857142857%	157 out of 7761 2.02293518876433%	0.102235	1	EVM0011230;EVM0013940;EVM0020435;EVM0021959;EVM0022449;EVM0024570;EVM0036125
Biosynthesis of amino acids	ko01230	14	383	196	7761	14 out of 196 7.14285714285714%	383 out of 7761 4.93493106558433%	0.104507	1	Apium_graveolens_newGene_4421;Apium_graveolens_newGene_4422;EVM0005623;EVM0009399;EVM0009610;EVM0009695;EVM0016077;EVM0018101;EVM0018106;EVM0020918;EVM0023775;EVM0024441;EVM0026793;EVM0043490
Biotin metabolism	ko00780	2	25	196	7761	2 out of 196 1.02040816326531%	25 out of 7761 0.322123437701327%	0.130496	1	EVM0000923;EVM0013150
Glycosaminoglycan degradation	ko00531	2	26	196	7761	2 out of 196 1.02040816326531%	26 out of 7761 0.33500837520938%	0.139128	1	EVM0017667;EVM0038509
Synthesis and degradation of ketone bodies	ko00072	1	7	196	7761	1 out of 196 0.510204081632653%	7 out of 7761 0.0901945625563716%	0.163996	1	EVM0006239
RNA degradation	ko03018	8	213	196	7761	8 out of 196 4.08163265306122%	213 out of 7761 2.74449168921531%	0.170605	1	EVM0001870;EVM0005623;EVM0007425;EVM0015643;EVM0015785;EVM0018341;EVM0025376;EVM0025436
Sesquiterpenoid and triterpenoid biosynthesis	ko00909	2	33	196	7761	2 out of 196 1.02040816326531%	33 out of 7761 0.425202937765752%	0.202309	1	EVM0002480;EVM0005572
Circadian rhythm - plant	ko04712	3	63	196	7761	3 out of 196 1.53061224489796%	63 out of 7761 0.811751063007344%	0.212489	1	EVM0004610;EVM0036390;EVM0036742
Fatty acid biosynthesis	ko00061	4	95	196	7761	4 out of 196 2.04081632653061%	95 out of 7761 1.22406906326504%	0.218658	1	EVM0000923;EVM0013150;EVM0013940;EVM0024570
Plant-pathogen interaction	ko04626	9	266	196	7761	9 out of 196 4.59183673469388%	266 out of 7761 3.42739337714212%	0.229964	1	EVM0000938;EVM0009764;EVM0013836;EVM0017908;EVM0018189;EVM0020004;EVM0026187;EVM0031656;EVM0035711
Ether lipid metabolism	ko00565	2	36	196	7761	2 out of 196 1.02040816326531%	36 out of 7761 0.463857750289911%	0.23032	1	Apium_graveolens_newGene_1019;EVM0018832
Protein processing in endoplasmic reticulum	ko04141	11	340	196	7761	11 out of 196 5.61224489795918%	340 out of 7761 4.38087875273805%	0.240526	1	Apium_graveolens_newGene_9472;EVM0002106;EVM0008825;EVM0009764;EVM0011692;EVM0017908;EVM0019111;EVM0023795;EVM0027855;EVM0041196;EVM0044582
Histidine metabolism	ko00340	2	38	196	7761	2 out of 196 1.02040816326531%	38 out of 7761 0.489627625306017%	0.249136	1	EVM0000599;EVM0024441
Glycerophospholipid metabolism	ko00564	5	141	196	7761	5 out of 196 2.55102040816327%	141 out of 7761 1.81677618863549%	0.284182	1	Apium_graveolens_newGene_1019;EVM0010538;EVM0018832;EVM0036053;EVM0036677
Fatty acid elongation	ko00062	2	44	196	7761	2 out of 196 1.02040816326531%	44 out of 7761 0.566937250354336%	0.305664	1	EVM0006320;EVM0044096
Sulfur metabolism	ko00920	2	44	196	7761	2 out of 196 1.02040816326531%	44 out of 7761 0.566937250354336%	0.305664	1	Apium_graveolens_newGene_4421;Apium_graveolens_newGene_4422
Phagosome	ko04145	4	113	196	7761	4 out of 196 2.04081632653061%	113 out of 7761 1.45599793841%	0.319321	1	EVM0002084;EVM0020096;EVM0035484;EVM0041417
Protein export	ko03060	3	80	196	7761	3 out of 196 1.53061224489796%	80 out of 7761 1.03079500064425%	0.328881	1	EVM0008825;EVM0023795;EVM0044582
Terpenoid backbone biosynthesis	ko00900	3	81	196	7761	3 out of 196 1.53061224489796%	81 out of 7761 1.0436799381523%	0.335839	1	EVM0001357;EVM0004278;EVM0006239
Lysine degradation	ko00310	2	48	196	7761	2 out of 196 1.02040816326531%	48 out of 7761 0.618477000386548%	0.342963	1	EVM0000599;EVM0044311
Carbon metabolism	ko01200	13	462	196	7761	13 out of 196 6.63265306122449%	462 out of 7761 5.95284112872053%	0.384261	1	Apium_graveolens_newGene_8191;EVM0004586;EVM0005623;EVM0009399;EVM0011230;EVM0016077;EVM0017039;EVM0018101;EVM0020918;EVM0030573;EVM0033614;EVM0043490;EVM0044311
Ribosome biogenesis in eukaryotes	ko03008	5	164	196	7761	5 out of 196 2.55102040816327%	164 out of 7761 2.11312975132071%	0.399416	1	Apium_graveolens_newGene_2405;EVM0004610;EVM0011042;EVM0019966;EVM0038946
Linoleic acid metabolism	ko00591	1	22	196	7761	1 out of 196 0.510204081632653%	22 out of 7761 0.283468625177168%	0.430791	1	EVM0002392
Fatty acid metabolism	ko01212	5	177	196	7761	5 out of 196 2.55102040816327%	177 out of 7761 2.2806339389254%	0.464331	1	EVM0000923;EVM0006320;EVM0013150;EVM0013940;EVM0024570
Phenylalanine, tyrosine and tryptophan biosynthesis	ko00400	2	62	196	7761	2 out of 196 1.02040816326531%	62 out of 7761 0.798866125499291%	0.467029	1	EVM0009610;EVM0009695
Endocytosis	ko04144	7	258	196	7761	7 out of 196 3.57142857142857%	258 out of 7761 3.3243138770777%	0.478294	1	EVM0011692;EVM0012749;EVM0013598;EVM0018832;EVM0032458;EVM0040646;EVM0043980
Butanoate metabolism	ko00650	1	27	196	7761	1 out of 196 0.510204081632653%	27 out of 7761 0.347893312717433%	0.499328	1	EVM0006239
Pentose and glucuronate interconversions	ko00040	5	188	196	7761	5 out of 196 2.55102040816327%	188 out of 7761 2.42236825151398%	0.517612	1	Apium_graveolens_newGene_2327;EVM0000599;EVM0007151;EVM0012271;EVM0029923
Base excision repair	ko03410	2	70	196	7761	2 out of 196 1.02040816326531%	70 out of 7761 0.901945625563716%	0.531512	1	EVM0013431;EVM0026378
Carbon fixation in photosynthetic organisms	ko00710	4	154	196	7761	4 out of 196 2.04081632653061%	154 out of 7761 1.98428037624018%	0.548632	1	EVM0009399;EVM0017039;EVM0020918;EVM0043490
Pyruvate metabolism	ko00620	4	156	196	7761	4 out of 196 2.04081632653061%	156 out of 7761 2.01005025125628%	0.558913	1	EVM0000599;EVM0016077;EVM0017039;EVM0018101
Valine, leucine and isoleucine degradation	ko00280	2	76	196	7761	2 out of 196 1.02040816326531%	76 out of 7761 0.979255250612035%	0.576288	1	EVM0000599;EVM0006239
Aminoacyl-tRNA biosynthesis	ko00970	2	85	196	7761	2 out of 196 1.02040816326531%	85 out of 7761 1.09521968818451%	0.637475	1	EVM0020723;EVM0039220
Tyrosine metabolism	ko00350	2	87	196	7761	2 out of 196 1.02040816326531%	87 out of 7761 1.12098956320062%	0.650099	1	EVM0004147;EVM0032948
Cysteine and methionine metabolism	ko00270	4	177	196	7761	4 out of 196 2.04081632653061%	177 out of 7761 2.2806339389254%	0.658703	1	Apium_graveolens_newGene_4421;Apium_graveolens_newGene_4422;EVM0007114;EVM0018106
SNARE interactions in vesicular transport	ko04130	1	56	196	7761	1 out of 196 0.510204081632653%	56 out of 7761 0.721556500450973%	0.762498	1	EVM0017364
mRNA surveillance pathway	ko03015	4	210	196	7761	4 out of 196 2.04081632653061%	210 out of 7761 2.70583687669115%	0.782529	1	EVM0001870;EVM0010439;EVM0015643;EVM0018341
Nitrogen metabolism	ko00910	1	60	196	7761	1 out of 196 0.510204081632653%	60 out of 7761 0.773096250483185%	0.785763	1	EVM0036031
Cyanoamino acid metabolism	ko00460	2	118	196	7761	2 out of 196 1.02040816326531%	118 out of 7761 1.52042262595026%	0.803936	1	EVM0017069;EVM0041849
beta-Alanine metabolism	ko00410	1	69	196	7761	1 out of 196 0.510204081632653%	69 out of 7761 0.889060688055663%	0.830147	1	EVM0000599
N-Glycan biosynthesis	ko00510	1	69	196	7761	1 out of 196 0.510204081632653%	69 out of 7761 0.889060688055663%	0.830147	1	Apium_graveolens_newGene_9472
RNA polymerase	ko03020	1	72	196	7761	1 out of 196 0.510204081632653%	72 out of 7761 0.927715500579822%	0.842804	1	EVM0023171
Purine metabolism	ko00230	4	238	196	7761	4 out of 196 2.04081632653061%	238 out of 7761 3.06661512691663%	0.857237	1	EVM0016077;EVM0018101;EVM0022038;EVM0023171
Proteasome	ko03050	1	78	196	7761	1 out of 196 0.510204081632653%	78 out of 7761 1.00502512562814%	0.865372	1	EVM0030468
alpha-Linolenic acid metabolism	ko00592	1	79	196	7761	1 out of 196 0.510204081632653%	79 out of 7761 1.01791006313619%	0.868807	1	EVM0004147
Basal transcription factors	ko03022	1	79	196	7761	1 out of 196 0.510204081632653%	79 out of 7761 1.01791006313619%	0.868807	1	EVM0005168
Glyoxylate and dicarboxylate metabolism	ko00630	2	139	196	7761	2 out of 196 1.02040816326531%	139 out of 7761 1.79100631361938%	0.87089	1	Apium_graveolens_newGene_8191;EVM0011230
Pentose phosphate pathway	ko00030	1	80	196	7761	1 out of 196 0.510204081632653%	80 out of 7761 1.03079500064425%	0.872154	1	EVM0030573
Biosynthesis of unsaturated fatty acids	ko01040	1	80	196	7761	1 out of 196 0.510204081632653%	80 out of 7761 1.03079500064425%	0.872154	1	EVM0013150
Glutathione metabolism	ko00480	2	143	196	7761	2 out of 196 1.02040816326531%	143 out of 7761 1.84254606365159%	0.880988	1	EVM0030573;EVM0043570
Plant hormone signal transduction	ko04075	8	463	196	7761	8 out of 196 4.08163265306122%	463 out of 7761 5.96572606622858%	0.906085	1	EVM0002830;EVM0003625;EVM0015578;EVM0019952;EVM0022353;EVM0026938;EVM0036634;EVM0038528
Citrate cycle (TCA cycle)	ko00020	1	93	196	7761	1 out of 196 0.510204081632653%	93 out of 7761 1.19829918824894%	0.908666	1	EVM0044311
Oxidative phosphorylation	ko00190	4	274	196	7761	4 out of 196 2.04081632653061%	274 out of 7761 3.53047287720655%	0.920397	1	EVM0020096;EVM0025770;EVM0037646;EVM0039031
Glycine, serine and threonine metabolism	ko00260	1	100	196	7761	1 out of 196 0.510204081632653%	100 out of 7761 1.28849375080531%	0.923812	1	EVM0023775
Inositol phosphate metabolism	ko00562	1	101	196	7761	1 out of 196 0.510204081632653%	101 out of 7761 1.30137868831336%	0.925761	1	EVM0024441
Phosphatidylinositol signaling system	ko04070	1	109	196	7761	1 out of 196 0.510204081632653%	109 out of 7761 1.40445818837779%	0.93967	1	EVM0024441
Pyrimidine metabolism	ko00240	2	186	196	7761	2 out of 196 1.02040816326531%	186 out of 7761 2.39659837649787%	0.951895	1	EVM0023171;EVM0041176
Mismatch repair	ko03430	2	198	196	7761	2 out of 196 1.02040816326531%	198 out of 7761 2.55121762659451%	0.962952	1	EVM0015942;EVM0019383
Homologous recombination	ko03440	2	198	196	7761	2 out of 196 1.02040816326531%	198 out of 7761 2.55121762659451%	0.962952	1	EVM0015942;EVM0019383
Ubiquitin mediated proteolysis	ko04120	2	210	196	7761	2 out of 196 1.02040816326531%	210 out of 7761 2.70583687669115%	0.971556	1	EVM0002106;EVM0041196
DNA replication	ko03030	2	211	196	7761	2 out of 196 1.02040816326531%	211 out of 7761 2.7187218141992%	0.972179	1	EVM0015942;EVM0019383
Nucleotide excision repair	ko03420	2	232	196	7761	2 out of 196 1.02040816326531%	232 out of 7761 2.98930550186832%	0.982603	1	EVM0015942;EVM0019383
Ribosome	ko03010	5	506	196	7761	5 out of 196 2.55102040816327%	506 out of 7761 6.51977837907486%	0.996755	1	EVM0003670;EVM0015173;EVM0016736;EVM0035713;EVM0037392
Spliceosome	ko03040	2	342	196	7761	2 out of 196 1.02040816326531%	342 out of 7761 4.40664862775416%	0.998665	1	EVM0011692;EVM0041675
