# Supplementary material for: Transcriptomic and Proteomic Analyses of Celery Cytoplasmic Male Sterile Line and Its Maintainer Line
Source: Int J Mol Sci. 2023 Feb 20;24(4):4194. doi: 10.3390/ijms24044194 (PMC9967367; doi:10.3390/ijms24044194)
Supplement: Supplementary file 1 [file ijms-24-04194-s001.zip › Table S6.xlsx]

## Sheet: Sheet1
Table S6. All DEPs between the sterile line W99A and the fertile line W99B
#ID	T01	T02	T03	T04	T05	T06	log2FC	pvalue	regulated
EVM0015018	0.000170559	0.000137984	0.00016057	0.000334124	0.000319118	0.000339297	1.08119	0.000312451	up
EVM0017216	0.000161945	0.000137261	0.000120026	0.000336407	0.000319118	0.000259926	1.12673	0.00779281	up
EVM0036873	0.000193448	0.000170309	0.000127854	0.00037091	0.00032857	0.000294738	1.01604	0.00485386	up
EVM0031871	0.000152347	0.00013123	8.83136e-05	0.00035442	0.000294992	0.000304949	1.35966	0.00180346	up
EVM0007341	0.000470576	0.000458098	0.000323148	0.000173024	0.000166897	0.000136229	-1.39454	0.026317	down
EVM0023914	0.000196155	0.000183818	0.000141503	0.000382834	0.000368366	0.000317249	1.03485	0.00241507	up
EVM0033290	0.000417169	0.000527573	0.000341814	0.000186724	0.000218383	0.000186126	-1.12172	0.0454943	down
EVM0004996	0.000408801	0.00039176	0.000292037	0.000194335	0.000195749	0.000149226	-1.01858	0.0236486	down
EVM0037081	0.000386896	0.000397308	0.000288625	0.000149937	0.000146501	0.000117895	-1.37256	0.0175547	down
EVM0019144	0.000173759	0.000149081	9.75464e-05	0.000402116	0.000343494	0.000314696	1.33469	0.00355306	up
EVM0021381	0.000175482	0.000145704	0.000107381	0.00040034	0.000398462	0.000323051	1.38829	0.00250731	up
EVM0040253	0.000517092	0.000404063	0.00034623	0.000282876	0.0001955	0.000138782	-1.03814	0.0309172	down
EVM0019483	0.000485343	0.000488252	0.000333986	0.000162368	0.000162419	0.000133212	-1.51348	0.0273116	down
EVM0016859	0.00015087	0.0001293	9.03207e-05	0.000341735	0.000281312	0.000225811	1.19608	0.0238563	up
EVM0006014	0.000144717	0.000122063	9.63421e-05	0.000380044	0.000346478	0.000323283	1.53159	0.000514883	up
EVM0017883	0.000267283	0.000257635	0.000189272	0.000119239	0.000142521	7.12476e-05	-1.10075	0.0178512	down
EVM0001985	0.000388865	0.000394413	0.000592303	0.000149937	0.00013879	0.000116271	-1.76406	0.0377039	down
EVM0022341	0.000237257	0.000203599	0.000150535	0.000487105	0.000479548	0.000369699	1.17612	0.00815395	up
EVM0004495	0.000177697	0.000151735	0.000118822	0.00038182	0.000359661	0.000318178	1.24121	0.00132677	up
EVM0024601	0.000454579	0.000447002	0.000307091	0.000143341	0.000134313	0.000108148	-1.64749	0.0247718	down
EVM0025387	0.00036573	0.000373426	0.000426515	7.91546e-05	0.000135059	0.000115342	-1.82256	0.000428055	down
EVM0016962	0.000452118	0.000478603	0.000399619	0.000175054	0.000180328	9.81686e-05	-1.55246	0.00124897	down
EVM0015259	0.000175728	0.000152699	0.000118621	0.000375984	0.000364138	0.00029056	1.2051	0.00615287	up
EVM0035713	0.000543181	0.000500314	0.000398415	0.000157548	0.000149237	0.000118823	-1.76038	0.0112099	down
EVM0019595	0.00044818	0.000433734	0.000317528	0.000176322	0.000164907	0.000128803	-1.35153	0.0188254	down
EVM0024249	0.000177943	0.000149805	0.00010698	0.000339452	0.000309418	0.000231149	1.01742	0.0242562	up
EVM0021904	0.000449902	0.000427944	0.000330373	0.000141819	0.000144511	0.000128106	-1.54366	0.0172362	down
EVM0006657	0.000379513	0.000348821	0.000293442	0.000153235	0.000148988	0.000118591	-1.27982	0.00729008	down
EVM0020149	0.00019394	0.000161384	0.000100156	0.000411249	0.000294494	0.000364825	1.23292	0.0103497	up
EVM0005288	0.000461224	0.000468713	0.00032656	0.000149176	0.000165155	0.000124625	-1.51726	0.0219889	down
EVM0005256	0.000540228	0.000481498	0.000413268	0.000152982	0.000153217	0.000123465	-1.73977	0.00817611	down
EVM0010539	0.000383943	0.000379698	0.000321542	0.000166681	0.000198236	0.000109308	-1.19429	0.00423212	down
EVM0035555	0.000464177	0.000447725	0.000376738	0.000197379	0.000200475	0.000184965	-1.14473	0.0108957	down
EVM0029429	0.000245133	0.000189608	0.000131668	0.000503342	0.000398462	0.000458816	1.26435	0.00413856	up
EVM0017168	0.000346533	0.000341101	0.000349842	0.00014943	0.00014675	0.000123233	-1.30664	0.000713707	down
EVM0002389	0.000427506	0.000426015	0.000523459	0.00016795	0.000157196	0.000138318	-1.57098	0.00759716	down
EVM0003549	0.000146932	0.000118445	8.79122e-05	0.000277802	0.000238033	0.000208869	1.03654	0.0097724	up
EVM0042995	0.000319953	0.000548319	0.000420694	0.000140297	0.000142521	0.000279653	-1.19636	0.0458815	down
EVM0008859	0.000138072	0.000121098	8.93172e-05	0.000321439	0.000230571	0.000291721	1.27568	0.0116062	up
EVM0015252	0.000195417	0.000170068	0.000161574	0.000361777	0.000344986	0.000369002	1.02933	0.000247013	up
EVM0041497	0.000414215	0.000442901	0.000372322	0.000204736	0.000208185	0.000157116	-1.10887	0.0013599	down
EVM0009570	0.000210923	0.000194915	0.000155151	8.39749e-05	7.9593e-05	7.75137e-05	-1.21845	0.0221411	down
EVM0030560	0.000505771	0.000509481	0.000380351	0.000149683	0.000147247	0.000122769	-1.73346	0.0137983	down
EVM0037042	0.000378528	0.000373667	0.000300868	0.000141058	0.000139536	0.00010281	-1.45766	0.00448639	down
EVM0032601	0.000374098	0.000324939	0.000264339	0.000184694	0.000157445	0.000131123	-1.02546	0.020491	down
EVM0038295	0.000487805	0.000470884	0.000307693	0.000166935	0.000164161	0.000150154	-1.39585	0.0439149	down
EVM0032169	0.00019271	0.000193468	0.000134678	8.44823e-05	8.05879e-05	6.84627e-05	-1.15726	0.0326907	down
EVM0004368	0.000621938	0.000606214	0.000400422	8.54971e-05	9.1532e-05	6.034e-05	-2.77841	0.0212949	down
EVM0023545	0.000595358	0.000602837	0.000455618	6.92603e-05	7.38723e-05	5.63947e-05	-3.05114	0.00898371	down
EVM0039419	6.74361e-05	5.25884e-05	3.9139e-05	0.000141058	0.00012312	0.000108844	1.22875	0.00477169	up
EVM0026438	0.000487558	0.000453756	0.000369111	0.000205498	0.000196495	0.000162454	-1.21513	0.0115254	down
EVM0028634	0.000459009	0.000457616	0.000352853	0.00011036	0.000291261	0.000202835	-1.07053	0.0303185	down
EVM0019409	0.00023578	0.000229652	0.000163581	0.000101227	9.22781e-05	8.47081e-05	-1.1769	0.0324671	down
EVM0025885	0.000505279	0.000466059	0.000380953	4.59198e-05	5.24816e-05	4.47909e-05	-3.23938	0.00798041	down
EVM0036066	0.000529644	0.00047209	0.000337197	0.000185202	0.000211668	0.000146441	-1.30124	0.0328848	down
EVM0032846	0.000526199	0.000506103	0.000368509	0.000131924	0.000120882	0.000101418	-1.98353	0.0170827	down
EVM0003515	0.00016859	0.00013316	9.87507e-05	0.000373194	0.000375331	0.000253428	1.32294	0.0219767	up
EVM0002216	0.000591174	0.000567135	0.000447589	8.34675e-05	9.17807e-05	7.42646e-05	-2.68619	0.00882941	down
EVM0035454	0.000200586	0.000161866	0.000124643	0.000395519	0.00032459	0.000292185	1.05536	0.0120755	up
EVM0020293	0.00049125	0.000438076	0.000329169	0.000226047	0.000214155	0.000184733	-1.00992	0.040218	down
EVM0033448	0.000487558	0.000488735	0.000341212	0.000139789	0.000146003	0.000132052	-1.65677	0.0249978	down
EVM0031399	0.000414708	0.000390071	0.000326359	0.000183426	0.000192516	0.000158509	-1.08165	0.0094143	down
EVM0023846	0.000545888	0.000546871	0.000319735	0.000183172	0.000149734	0.00013855	-1.58305	0.0495134	down
EVM0038942	0.000458517	0.000447484	0.000344624	0.000186216	0.00018381	0.000142727	-1.28631	0.0122145	down
EVM0008069	0.000178927	0.000140397	0.000113804	0.000418099	0.000403437	0.000350436	1.43607	0.000941084	up
EVM0012369	0.000205262	0.000185989	0.00014351	0.000475943	0.000495466	0.000420523	1.38012	0.000720622	up
EVM0042134	0.000447934	0.000447967	0.000366903	0.000229092	0.000195003	0.000187286	-1.04649	0.00632112	down
EVM0023343	7.3343e-05	6.00666e-05	5.0981e-05	0.000142072	0.000121379	0.00013182	1.10008	0.00138403	up
EVM0003997	0.000226428	0.000184783	0.000197903	0.000479748	0.000480543	0.000349276	1.10431	0.0260109	up
EVM0015572	0.000478452	0.000559416	0.000340007	0.000178098	0.000166399	0.000155724	-1.46181	0.0435011	down
EVM0026320	0.000509955	0.000527332	0.000420694	1e-06	0.00022684	0.000170345	-1.87246	0.0198933	down
EVM0036749	0.000250547	0.000199498	0.000164384	0.000495985	0.000391249	0.000419595	1.08875	0.00519276	up
EVM0041408	0.000589697	0.000560622	0.000343219	0.000134715	0.000155455	9.60799e-05	-1.95113	0.0362488	down
EVM0020135	0.000432674	0.000556762	0.000365899	0.000170741	0.000261165	9.02779e-05	-1.37602	0.0209772	down
EVM0013999	0.000502572	0.000510204	0.000355262	0.000175561	0.000176597	0.000155724	-1.42954	0.0277408	down
EVM0030626	0.000259654	0.000211077	0.000158764	0.000484568	0.000422838	0.000387336	1.0404	0.00551692	up
EVM0004515	0.000459747	0.000452791	0.000352251	0.000212855	0.000226591	0.000173826	-1.0443	0.0130034	down
EVM0005815	0.000507248	0.000462682	0.000345627	0.000186724	0.000204206	0.000172433	-1.22354	0.0312524	down
EVM0006778	0.000260146	0.000222174	0.000151137	0.000466809	0.000450695	0.000375501	1.02941	0.00697121	up
EVM0033400	0.000461224	0.000436146	0.000357269	0.000213616	0.000217388	0.000190999	-1.01228	0.0162885	down
EVM0032263	0.000253009	0.000219038	0.000156155	0.000471376	0.000454178	0.000372019	1.04652	0.0060192	up
EVM0028476	0.000168098	0.000135331	0.000100356	0.000419621	0.000344488	0.000258534	1.34064	0.0326194	up
EVM0008066	0.000239718	0.000207459	0.000123238	0.000475689	0.00052407	0.000364361	1.25789	0.0130646	up
EVM0000542	0.000527676	0.000492112	0.00032957	0.000198394	0.000177094	0.000158044	-1.33862	0.04252	down
Apium_graveolens_newGene_1546	0.000208215	0.000205529	0.00016037	8.24527e-05	8.15828e-05	6.79986e-05	-1.307	0.0123727	down
Apium_graveolens_newGene_355	0.000538012	0.00053288	0.000377139	0.00012685	0.000138542	9.93289e-05	-1.98923	0.0170148	down
Apium_graveolens_newGene_9209	0.000518569	0.000520819	0.000387777	0.000144863	0.000161425	0.000135301	-1.69238	0.0152622	down
Apium_graveolens_newGene_1663	0.000191479	0.000157042	0.000116413	0.000506387	0.000530786	0.000431895	1.6598	0.00121824	up
Apium_graveolens_newGene_1502	0.000159484	0.000136537	8.26937e-05	0.000430276	0.000370107	0.000243449	1.46271	0.0412399	up
