# Supplementary material for: Transcriptomic and Proteomic Analyses of Celery Cytoplasmic Male Sterile Line and Its Maintainer Line
Source: Int J Mol Sci. 2023 Feb 20;24(4):4194. doi: 10.3390/ijms24044194 (PMC9967367; doi:10.3390/ijms24044194)
Supplement: Supplementary file 1 [file ijms-24-04194-s001.zip › Table S7.xlsx]

## Sheet: Biological Process (BP)
Table S7. TopGO enrichment result file of differentially expressed proteins (BP)
#Term	mNum	nNum	MNum	NNum	GIDs
Biological Process: lipid transport (GO:0006869);	3	6	40	2747	EVM0017883;EVM0037042;EVM0010539
Biological Process: photosynthesis (GO:0015979);	2	36	40	2747	EVM0016859;EVM0006014
Biological Process: photoinhibition (GO:0010205);	1	4	40	2747	EVM0022341
Biological Process: proteolysis (GO:0006508);	2	97	40	2747	EVM0022341;EVM0002389
Biological Process: reductive pentose-phosphate cycle (GO:0019253);	1	5	40	2747	EVM0031871
Biological Process: nucleosome assembly (GO:0006334);	2	11	40	2747	EVM0032601;Apium_graveolens_newGene_9209
Biological Process: photorespiration (GO:0009853);	1	7	40	2747	EVM0031871
Biological Process: PSII associated light-harvesting complex II catabolic process (GO:0010304);	1	4	40	2747	EVM0022341
Biological Process: long-chain fatty acid metabolic process (GO:0001676);	1	5	40	2747	EVM0001985
Biological Process: plant-type cell wall organization (GO:0009664);	2	16	40	2747	EVM0012369;EVM0005288
Biological Process: fatty-acyl-CoA biosynthetic process (GO:0046949);	1	1	40	2747	EVM0001985
Biological Process: defense response (GO:0006952);	1	13	40	2747	EVM0017883
Biological Process: response to oxidative stress (GO:0006979);	2	32	40	2747	EVM0005288;EVM0020149
Biological Process: GMP biosynthetic process (GO:0006177);	1	3	40	2747	EVM0006778
Biological Process: translation (GO:0006412);	1	118	40	2747	EVM0008859
Biological Process: metabolic process (GO:0008152);	5	110	40	2747	EVM0019483;EVM0031399;EVM0037081;EVM0002216;EVM0003549
Biological Process: response to karrikin (GO:0080167);	1	2	40	2747	EVM0038942
Biological Process: fatty acid beta-oxidation, unsaturated, even number (GO:0033542);	1	2	40	2747	EVM0032263
Biological Process: biological_process (GO:0044699);	1	19	40	2747	EVM0016962
Biological Process: glucose metabolic process (GO:0006006);	1	12	40	2747	EVM0023914
Biological Process: glycine decarboxylation via glycine cleavage system (GO:0019464);	1	7	40	2747	EVM0017216
Biological Process: pollen exine formation (GO:0010584);	2	4	40	2747	EVM0037081;EVM0031399
Biological Process: photosystem II repair (GO:0010206);	1	6	40	2747	EVM0022341
Biological Process: macromolecule modification (GO:0043412);	1	1	40	2747	EVM0033400
Biological Process: metabolic process (GO:0044710);	2	21	40	2747	EVM0038942;EVM0035454
Biological Process: hydrogen peroxide catabolic process (GO:0042744);	1	18	40	2747	EVM0005288
Biological Process: thylakoid membrane organization (GO:0010027);	1	8	40	2747	EVM0022341
Biological Process: removal of superoxide radicals (GO:0019430);	1	9	40	2747	EVM0009570
Biological Process: carbon utilization (GO:0015976);	1	3	40	2747	EVM0036873
Biological Process: glutamine biosynthetic process (GO:0006542);	1	2	40	2747	EVM0019144
Biological Process: oxidation-reduction process (GO:0055114);	10	361	40	2747	EVM0007341;EVM0017216;EVM0017168;EVM0009570;EVM0023914;EVM0031871;EVM0005288;EVM0006014;EVM0020149;EVM0021381
Biological Process: chorismate biosynthetic process (GO:0009423);	1	7	40	2747	EVM0004495
Biological Process: chlorophyll biosynthetic process (GO:0015995);	1	12	40	2747	EVM0006014
Biological Process: carbohydrate metabolic process (GO:0005975);	1	75	40	2747	EVM0025387
Biological Process: phosphorylation (GO:0016310);	1	90	40	2747	EVM0013999
Biological Process: fatty acid biosynthetic process (GO:0006633);	1	18	40	2747	EVM0015018
Biological Process: aromatic amino acid family biosynthetic process (GO:0009073);	1	7	40	2747	EVM0004495
Biological Process: sporopollenin biosynthetic process (GO:0080110);	1	4	40	2747	EVM0001985
Biological Process: flavonoid metabolic process (GO:0009812);	1	3	40	2747	EVM0038942
Biological Process: mannan catabolic process (GO:0046355);	1	1	40	2747	EVM0023846
Biological Process: embryo development ending in seed dormancy (GO:0009793);	1	33	40	2747	EVM0037081
Biological Process: regulation of transcription, DNA-templated (GO:0006355);	1	38	40	2747	Apium_graveolens_newGene_9209
Biological Process: ribosomal large subunit assembly (GO:0000027);	1	4	40	2747	EVM0008859
Biological Process: translational elongation (GO:0006414);	1	21	40	2747	EVM0035713

## Sheet: Cellular Component (CC)
Table S7. TopGO enrichment result file of differentially expressed proteins (CC)
#Term	mNum	nNum	MNum	NNum	GIDs
Cellular Component: cell wall (GO:0005618);	2	58	39	2626	EVM0012369;EVM0023343
Cellular Component: chloroplast thylakoid membrane (GO:0009535);	3	78	39	2626	EVM0006014;EVM0022341;EVM0016859
Cellular Component: cytoplasmic part (GO:0044444);	1	53	39	2626	EVM0019409
Cellular Component: chloroplast (GO:0009507);	2	170	39	2626	EVM0019144;EVM0031871
Cellular Component: mitochondrial large ribosomal subunit (GO:0005762);	1	2	39	2626	EVM0008859
Cellular Component: glycine cleavage complex (GO:0005960);	1	6	39	2626	EVM0017216
Cellular Component: cell periphery (GO:0071944);	1	13	39	2626	EVM0035555
Cellular Component: ribosome (GO:0005840);	1	55	39	2626	EVM0035713
Cellular Component: cytosol (GO:0005829);	3	246	39	2626	EVM0006778;EVM0004495;EVM0017216
Cellular Component: plasma membrane (GO:0005886);	1	168	39	2626	EVM0016962
Cellular Component: photosystem I reaction center (GO:0009538);	1	5	39	2626	EVM0016859
Biological Process: cellular oxidant detoxification (GO:0098869);	1	38	39	2626	EVM0005288
Cellular Component: mitochondrion (GO:0005739);	4	128	39	2626	EVM0017216;EVM0003515;Apium_graveolens_newGene_9209;EVM0022341
Cellular Component: mitochondrial respiratory chain complex I (GO:0005747);	1	8	39	2626	EVM0020149
Cellular Component: chloroplast stroma (GO:0009570);	1	98	39	2626	EVM0004495
Cellular Component: intracellular (GO:0005622);	1	68	39	2626	EVM0036749
Cellular Component: membrane (GO:0016020);	7	308	39	2626	EVM0013999;EVM0033400;EVM0012369;EVM0000542;EVM0041408;EVM0023343;EVM0024249
Cellular Component: plant-type cell wall (GO:0009505);	1	28	39	2626	EVM0005288
Cellular Component: endoplasmic reticulum (GO:0005783);	1	63	39	2626	EVM0001985
Cellular Component: nucleosome (GO:0000786);	2	14	39	2626	EVM0032601;Apium_graveolens_newGene_9209
Cellular Component: peroxisome (GO:0005777);	1	31	39	2626	EVM0032263
Cellular Component: integral component of membrane (GO:0016021);	7	541	39	2626	EVM0022341;EVM0032601;EVM0039419;EVM0004368;EVM0017168;EVM0037042;EVM0016962
Cellular Component: cytoskeleton (GO:0005856);	1	2	39	2626	EVM0042995
Cellular Component: nucleolus (GO:0005730);	1	28	39	2626	EVM0004495
Cellular Component: cytoplasm (GO:0005737);	1	229	39	2626	EVM0042995
Cellular Component: nucleus (GO:0005634);	2	173	39	2626	Apium_graveolens_newGene_9209;EVM0032601
Cellular Component: anchored component of plasma membrane (GO:0046658);	2	24	39	2626	EVM0019483;EVM0037081
Cellular Component: intrinsic component of membrane (GO:0031224);	1	11	39	2626	EVM0035555
Cellular Component: chloroplast envelope (GO:0009941);	3	62	39	2626	EVM0003515;EVM0006014;EVM0022341
Cellular Component: extracellular region (GO:0005576);	6	44	39	2626	EVM0024601;EVM0005288;EVM0012369;EVM0002389;EVM0009570;EVM0020293

## Sheet: Molecular Function (MF)
Table S7. TopGO enrichment result file of differentially expressed proteins (MF)
#Term	mNum	nNum	MNum	NNum	GIDs
Molecular Function: anthocyanidin 3-O-glucosyltransferase activity (GO:0047213);	1	1	52	3089	EVM0038942
Molecular Function: structural constituent of ribosome (GO:0003735);	2	124	52	3089	EVM0035713;EVM0008859
Molecular Function: heme binding (GO:0020037);	2	54	52	3089	EVM0005288;EVM0017168
Molecular Function: dioxygenase activity (GO:0051213);	1	9	52	3089	EVM0015018
Molecular Function: FMN binding (GO:0010181);	2	15	52	3089	EVM0021381;EVM0004495
Molecular Function: NADP binding (GO:0050661);	1	14	52	3089	EVM0023914
Molecular Function: aromatase activity (GO:0070330);	1	2	52	3089	EVM0017168
Molecular Function: lipid binding (GO:0008289);	3	8	52	3089	EVM0017883;EVM0037042;EVM0010539
Molecular Function: nucleosomal DNA binding (GO:0031492);	2	2	52	3089	Apium_graveolens_newGene_9209;EVM0032601
Molecular Function: carbonate dehydratase activity (GO:0004089);	1	3	52	3089	EVM0036873
Molecular Function: nucleotide binding (GO:0000166);	1	161	52	3089	EVM0008066
Molecular Function: rRNA binding (GO:0019843);	1	21	52	3089	EVM0008859
Molecular Function: pyridoxal phosphate binding (GO:0030170);	1	48	52	3089	EVM0036749
Molecular Function: protein kinase activity (GO:0004672);	1	64	52	3089	EVM0008066
Molecular Function: zinc ion binding (GO:0008270);	2	116	52	3089	EVM0036873;EVM0020149
Molecular Function: flavin adenine dinucleotide binding (GO:0050660);	1	30	52	3089	EVM0007341
Molecular Function: transferase activity, transferring glycosyl groups (GO:0016757);	2	22	52	3089	EVM0033400;EVM0006778
Molecular Function: protochlorophyllide reductase activity (GO:0016630);	1	2	52	3089	EVM0006014
Molecular Function: mannan endo-1,4-beta-mannosidase activity (GO:0016985);	1	1	52	3089	EVM0023846
Molecular Function: iron ion binding (GO:0005506);	1	40	52	3089	EVM0017168
Molecular Function: oxidoreductase activity, acting on CH-OH group of donors (GO:0016614);	1	6	52	3089	EVM0007341
Molecular Function: peptidase activity (GO:0008233);	1	22	52	3089	EVM0029429
Molecular Function: NAD binding (GO:0051287);	1	35	52	3089	EVM0023914
Molecular Function: GMP synthase (glutamine-hydrolyzing) activity (GO:0003922);	1	3	52	3089	EVM0006778
Molecular Function: polysaccharide binding (GO:0030247);	2	14	52	3089	EVM0019483;EVM0037081
Molecular Function: ATP binding (GO:0005524);	2	411	52	3089	EVM0022341;EVM0019144
Molecular Function: nucleic acid binding (GO:0003676);	2	90	52	3089	EVM0040253;EVM0033290
Molecular Function: double-stranded DNA binding (GO:0003690);	1	2	52	3089	Apium_graveolens_newGene_9209
Molecular Function: quercetin 3-O-glucosyltransferase activity (GO:0080043);	1	8	52	3089	EVM0038942
Molecular Function: kinase activity (GO:0016301);	1	64	52	3089	EVM0013999
Molecular Function: hydrolase activity, hydrolyzing O-glycosyl compounds (GO:0004553);	4	33	52	3089	EVM0037081;EVM0019483;EVM0025387;EVM0003549
Molecular Function: hydrolase activity, acting on glycosyl bonds (GO:0016798);	1	23	52	3089	EVM0002216
Molecular Function: ribulose-bisphosphate carboxylase activity (GO:0016984);	1	5	52	3089	EVM0031871
Molecular Function: 2 iron, 2 sulfur cluster binding (GO:0051537);	1	15	52	3089	EVM0020149
Molecular Function: GMP synthase activity (GO:0003921);	1	3	52	3089	EVM0006778
Molecular Function: oxidoreductase activity, acting on the aldehyde or oxo group of donors, NAD or NADP as acceptor (GO:0016620);	1	7	52	3089	EVM0023914
Molecular Function: manganese ion binding (GO:0030145);	2	12	52	3089	EVM0020293;EVM0009570
Molecular Function: metalloendopeptidase activity (GO:0004222);	1	21	52	3089	EVM0022341
Molecular Function: metal ion binding (GO:0046872);	5	200	52	3089	EVM0015259;EVM0028476;EVM0005288;EVM0040253;EVM0033290
Molecular Function: chorismate synthase activity (GO:0004107);	1	2	52	3089	EVM0004495
Molecular Function: monooxygenase activity (GO:0004497);	1	23	52	3089	EVM0031871
Molecular Function: glutamate-ammonia ligase activity (GO:0004356);	1	2	52	3089	EVM0019144
Molecular Function: superoxide dismutase activity (GO:0004784);	1	7	52	3089	EVM0009570
Molecular Function: protein heterodimerization activity (GO:0046982);	2	17	52	3089	Apium_graveolens_newGene_9209;EVM0032601
Molecular Function: transferase activity (GO:0016740);	1	67	52	3089	EVM0028476
Molecular Function: actin binding (GO:0003779);	1	11	52	3089	EVM0042995
Molecular Function: 3R-hydroxyacyl-CoA dehydratase activity (GO:0080023);	1	2	52	3089	EVM0032263
Molecular Function: NADH dehydrogenase (ubiquinone) activity (GO:0008137);	1	11	52	3089	EVM0020149
Molecular Function: NADPH dehydrogenase activity (GO:0003959);	1	2	52	3089	EVM0006014
Molecular Function: electron transfer activity (GO:0009055);	1	42	52	3089	EVM0024249
Molecular Function: peroxidase activity (GO:0004601);	1	22	52	3089	EVM0005288
Molecular Function: medium-chain fatty acid-CoA ligase activity (GO:0031956);	1	1	52	3089	EVM0001985
Molecular Function: ATP-dependent peptidase activity (GO:0004176);	1	12	52	3089	EVM0022341
Molecular Function: oxidoreductase activity (GO:0016491);	6	110	52	3089	EVM0035555;EVM0021381;EVM0035454;EVM0015259;EVM0031399;EVM0026438
Molecular Function: hydrolase activity (GO:0016787);	2	92	52	3089	EVM0039419;EVM0008069
Molecular Function: long-chain fatty acid-CoA ligase activity (GO:0004467);	1	3	52	3089	EVM0001985
Molecular Function: glycine binding (GO:0016594);	1	2	52	3089	EVM0017216
Molecular Function: cysteine-type peptidase activity (GO:0008234);	1	3	52	3089	EVM0002389
Molecular Function: glycine dehydrogenase (decarboxylating) activity (GO:0004375);	1	2	52	3089	EVM0017216
Molecular Function: nutrient reservoir activity (GO:0045735);	3	10	52	3089	EVM0009570;EVM0032169;EVM0020293
