# Supplementary material for: Transcriptomic and Proteomic Analyses of Celery Cytoplasmic Male Sterile Line and Its Maintainer Line
Source: Int J Mol Sci. 2023 Feb 20;24(4):4194. doi: 10.3390/ijms24044194 (PMC9967367; doi:10.3390/ijms24044194)
Supplement: Supplementary file 1 [file ijms-24-04194-s001.zip › Table S8.xlsx]

## Sheet: 100_vs_99.KEGG
Table S8. KEGG pathways associated withthe 89 DEPs in the proteome
#Pathway	ko_ID	Diff_PRO_num	all_PRO_num	Diff_PRO	all_PRO	geneID
Starch and sucrose metabolism	ko00500	2	97	24	1902	EVM0002216; EVM0025387
Glyoxylate and dicarboxylate metabolism	ko00630	3	63	24	1902	EVM0017216; EVM0019144; EVM0031871
Biosynthesis of amino acids	ko01230	2	158	24	1902	EVM0004495; EVM0019144
Alanine, aspartate and glutamate metabolism	ko00250	1	37	24	1902	EVM0019144
Ascorbate and aldarate metabolism	ko00053	1	26	24	1902	EVM0015259
Photosynthesis	ko00195	1	51	24	1902	EVM0016859
Phenylalanine metabolism	ko00360	1	28	24	1902	EVM0001985
Fatty acid elongation	ko00062	1	9	24	1902	EVM0019409
RNA degradation	ko03018	1	46	24	1902	EVM0003997
Ribosome	ko03010	2	131	24	1902	EVM0008859; EVM0035713
Protein processing in endoplasmic reticulum	ko04141	1	117	24	1902	EVM0030626
Oxidative phosphorylation	ko00190	1	79	24	1902	EVM0020149
Porphyrin and chlorophyll metabolism	ko00860	1	24	24	1902	EVM0006014
Nitrogen metabolism	ko00910	2	14	24	1902	EVM0019144; EVM0036873
Fatty acid metabolism	ko01212	1	58	24	1902	EVM0019409
Linoleic acid metabolism	ko00591	1	5	24	1902	EVM0015018
Amino sugar and nucleotide sugar metabolism	ko00520	2	88	24	1902	EVM0002216; EVM0025387
Arginine biosynthesis	ko00220	1	24	24	1902	EVM0019144
Carbon metabolism	ko01200	3	216	24	1902	EVM0017216; EVM0023914; EVM0031871
Ubiquinone and other terpenoid-quinone biosynthesis	ko00130	1	19	24	1902	EVM0001985
Phenylpropanoid biosynthesis	ko00940	2	70	24	1902	EVM0001985; EVM0005288
Glycine, serine and threonine metabolism	ko00260	1	48	24	1902	EVM0017216
Steroid biosynthesis	ko00100	1	10	24	1902	EVM0005815
Phenylalanine, tyrosine and tryptophan biosynthesis	ko00400	1	23	24	1902	EVM0004495
Carbon fixation in photosynthetic organisms	ko00710	2	73	24	1902	EVM0023914; EVM0031871
alpha-Linolenic acid metabolism	ko00592	2	27	24	1902	EVM0015018; EVM0021381
Anthocyanin biosynthesis	ko00942	1	1	24	1902	EVM0038942
Fructose and mannose metabolism	ko00051	1	44	24	1902	EVM0023846
