# Supplementary material for: Transcriptomic and Proteomic Analyses of Celery Cytoplasmic Male Sterile Line and Its Maintainer Line
Source: Int J Mol Sci. 2023 Feb 20;24(4):4194. doi: 10.3390/ijms24044194 (PMC9967367; doi:10.3390/ijms24044194)
Supplement: Supplementary file 1 [file ijms-24-04194-s001.zip › Table S9.xlsx]

## Sheet: Sheet1
Table S9. 25 co-expressed differential genes/proteins in the proteome and transcriptome
Transcriptome	Intra-group trend changes	Proteome	Intra-group trend changes
EVM0003365	up	EVM0005288	down
EVM0005997	up	EVM0005288	down
EVM0028566	up	EVM0005288	down
EVM0036031	down	EVM0036873	up
EVM0027855	down	EVM0030626	up
EVM0005288	down	EVM0005288	down
EVM0008153	up	EVM0015018	up
EVM0016312	up	EVM0015018	up
EVM0036709	up	EVM0015018	up
EVM0044918	up	EVM0015018	up
EVM0002425	down	EVM0005815	down
EVM0005815	down	EVM0005815	down
EVM0031649	down	EVM0005815	down
EVM0006320	down	EVM0019409	down
EVM0001394	down	EVM0001985	down
EVM0001985	down	EVM0001985	down
EVM0007563	down	EVM0001985	down
EVM0014436	down	EVM0001985	down
EVM0033263	down	EVM0001985	down
EVM0035713	down	EVM0035713	down
EVM0037392	down	EVM0035713	down
EVM0027328	up	EVM0021381	up
EVM0016881	down	EVM0002216+EVM0025387	down
EVM0025387	down	EVM0002216+EVM0025387	down
EVM0023846	down	EVM0023846	down
EVM0025561	down	EVM0023846	down
