# Supplementary material for: Transcriptomic and Proteomic Analyses of Celery Cytoplasmic Male Sterile Line and Its Maintainer Line
Source: Int J Mol Sci. 2023 Feb 20;24(4):4194. doi: 10.3390/ijms24044194 (PMC9967367; doi:10.3390/ijms24044194)
Supplement: Supplementary file 1 [file ijms-24-04194-s001.zip › Table S10.xlsx]

## Sheet: sheet1
Table S10. The 25 co-expressed differential genes/proteins matched in GO term
W99A_vs_W99B reverseTrend.gene.GO
#Gene_Ontology_term	GO_id	Cluter_frequency	Genome_frequency	P-value	Corrected_P-value	rich_factor
response to stimulus	GO:0000077	3 out of 4 75%	4 out of 19810 0.0201918223119637%	1.235e-11	7.41e-11	3714.38
cellular process	GO:0043044	3 out of 4 75%	5 out of 19810 0.0252397778899546%	3.08738e-11	1.85243e-10	2971.5
metabolic process	GO:0006076	3 out of 4 75%	19 out of 19810 0.0959111559818274%	2.99009e-09	1.79405e-08	781.974
binding	GO:0001872	4 out of 4 100%	655 out of 19810 3.30641090358405%	1.1846e-06	7.10763e-06	30.2443
extracellular region	GO:0048046	3 out of 4 75%	214 out of 19810 1.08026249369006%	4.93308e-06	2.95985e-05	69.4276
catalytic activity	GO:0050552	1 out of 4 25%	3 out of 19810 0.0151438667339727%	0.000605663	0.00363398	1650.83
W99A_vs_W99B reverseTrend.protein.GO
#Gene_Ontology_term	GO_id	Cluter_frequency	Genome_frequency	P-value	Corrected_P-value	rich_factor
single-organism process	GO:0000902	1 out of 2 50%	1 out of 3784 0.0264270613107822%	0.000528541	0.00105708	1892
response to stimulus	GO:0006950	1 out of 2 50%	1 out of 3784 0.0264270613107822%	0.000528541	0.00105708	1892
W99A_vs_W99B sameTrend.gene.GO
#Gene_Ontology_term	GO_id	Cluter_frequency	Genome_frequency	P-value	Corrected_P-value	rich_factor
metabolic process	GO:0006076	10 out of 17 58.8235294117647%	19 out of 19810 0.0959111559818274%	6.9999e-28	5.59992e-27	613.313
organelle	GO:0010168	5 out of 17 29.4117647058824%	123 out of 19810 0.620898536092882%	4.95678e-08	3.96542e-07	47.3697
structural molecule activity	GO:0032947	2 out of 17 11.7647058823529%	20 out of 19810 0.100959111559818%	0.000130505	0.00104404	116.529
binding	GO:0001872	5 out of 17 29.4117647058824%	655 out of 19810 3.30641090358405%	0.000172987	0.00138389	8.89537
organelle part	GO:0005885	1 out of 17 5.88235294117647%	1 out of 19810 0.00504795557799091%	0.000858152	0.00686522	1165.29
response to stimulus	GO:0000077	1 out of 17 5.88235294117647%	4 out of 19810 0.0201918223119637%	0.00342845	0.0274276	291.324
cellular process	GO:0043044	1 out of 17 5.88235294117647%	5 out of 19810 0.0252397778899546%	0.00428384	0.0342707	233.059
macromolecular complex	GO:0030686	1 out of 17 5.88235294117647%	15 out of 19810 0.0757193336698637%	0.0127997	0.102398	77.6863
W99A_vs_W99B sameTrend.protein.GO
#Gene_Ontology_term	GO_id	Cluter_frequency	Genome_frequency	P-value	Corrected_P-value	rich_factor
single-organism process	GO:0000902	1 out of 9 11.1111111111111%	1 out of 3784 0.0264270613107822%	0.00237844	0.00951374	420.444
response to stimulus	GO:0006950	1 out of 9 11.1111111111111%	1 out of 3784 0.0264270613107822%	0.00237844	0.00951374	420.444
catalytic activity	GO:0003824	1 out of 9 11.1111111111111%	1 out of 3784 0.0264270613107822%	0.00237844	0.00951374	420.444
cell part	GO:0005618	1 out of 9 11.1111111111111%	11 out of 3784 0.290697674418605%	0.0258877	0.103551	38.2222
