# Supplementary material for: Transcriptomic and Proteomic Analyses of Celery Cytoplasmic Male Sterile Line and Its Maintainer Line
Source: Int J Mol Sci. 2023 Feb 20;24(4):4194. doi: 10.3390/ijms24044194 (PMC9967367; doi:10.3390/ijms24044194)
Supplement: Supplementary file 1 [file ijms-24-04194-s001.zip › Table S11.xlsx]

## Sheet: sheet1
Table S10. The 25 co-expressed differential genes/proteins matched in KEGG pathway
W99A_vs_W99B reverseTrend.gene.KEGG.
#Kegg_pathway	ko_id	Cluter_frequency	Genome_frequency	P-value	Corrected_P-value	rich_factor
Phenylpropanoid biosynthesis	ko00940	3 out of 5 60%	295 out of 7761 3.80105656487566%	0.000513574	0.00102715	15.7851
Nitrogen metabolism	ko00910	1 out of 5 20%	60 out of 7761 0.773096250483185%	0.0380714	0.0761428	25.87
W99A_vs_W99B reverseTrend.protein.KEGG
#Kegg_pathway	ko_id	Cluter_frequency	Genome_frequency	P-value	Corrected_P-value	rich_factor
Nitrogen metabolism	ko00910	1 out of 3 33.3333333333333%	14 out of 1903 0.735680504466632%	0.0219199	0.0219199	45.3095
W99A_vs_W99B ameTrend.gene.KEGG.
#Kegg_pathway	ko_id	Cluter_frequency	Genome_frequency	P-value	Corrected_P-value	rich_factor
Linoleic acid metabolism	ko00591	4 out of 21 19.047619047619%	22 out of 7761 0.283468625177168%	2.80823e-07	1.96576e-06	67.1948
Phenylalanine metabolism	ko00360	5 out of 21 23.8095238095238%	60 out of 7761 0.773096250483185%	4.31363e-07	3.01954e-06	30.7976
Ubiquinone and other terpenoid-quinone biosynthesis	ko00130	5 out of 21 23.8095238095238%	68 out of 7761 0.87617575054761%	8.12027e-07	5.68419e-06	27.1744
alpha-Linolenic acid metabolism	ko00592	5 out of 21 23.8095238095238%	79 out of 7761 1.01791006313619%	1.7226e-06	1.20582e-05	23.3906
Phenylpropanoid biosynthesis	ko00940	6 out of 21 28.5714285714286%	295 out of 7761 3.80105656487566%	9.59332e-05	0.000671532	7.51671
Steroid biosynthesis	ko00100	3 out of 21 14.2857142857143%	51 out of 7761 0.657131812910707%	0.000327121	0.00228985	21.7395
Fructose and mannose metabolism	ko00051	2 out of 21 9.52380952380952%	91 out of 7761 1.17252931323283%	0.0247106	0.172974	8.12245
W99A_vs_W99B sameTrend.protein.KEGG
#Kegg_pathway	ko_id	Cluter_frequency	Genome_frequency	P-value	Corrected_P-value	rich_factor
alpha-Linolenic acid metabolism	ko00592	2 out of 10 20%	27 out of 1903 1.41881240147136%	0.00813547	0.0325419	14.0963
Linoleic acid metabolism	ko00591	1 out of 10 10%	5 out of 1903 0.262743037309511%	0.0260267	0.104107	38.06
Fatty acid elongation	ko00062	1 out of 10 10%	9 out of 1903 0.47293746715712%	0.0464073	0.185629	21.1444
Phenylpropanoid biosynthesis	ko00940	2 out of 10 20%	70 out of 1903 3.67840252233316%	0.0495971	0.198388	5.43714
