# Supplementary material for: Transcriptomic and Proteomic Analyses of Celery Cytoplasmic Male Sterile Line and Its Maintainer Line
Source: Int J Mol Sci. 2023 Feb 20;24(4):4194. doi: 10.3390/ijms24044194 (PMC9967367; doi:10.3390/ijms24044194)
Supplement: Supplementary file 1 [file ijms-24-04194-s001.zip › Table S12.xlsx]

## Sheet: dep_geneNO
Table S12. The expression of DEGs/DEPs in different omics in cluster analysis
Gene ID	mRNA expression level	Gene ID	protein expression level
EVM0006014	normal	EVM0006014	up
EVM0015209	normal	EVM0006014	up
EVM0022554	normal	EVM0006014	up
EVM0016183	normal	EVM0017216	up
EVM0017216	normal	EVM0017216	up
EVM0015259	normal	EVM0015259	up
EVM0021396	normal	EVM0015259	up
Apium_graveolens_newGene_10418	normal	EVM0005288	down
Apium_graveolens_newGene_10419	normal	EVM0005288	down
Apium_graveolens_newGene_9036	normal	EVM0005288	down
Apium_graveolens_newGene_9182	normal	EVM0005288	down
EVM0002647	normal	EVM0005288	down
EVM0002954	normal	EVM0005288	down
EVM0004358	normal	EVM0005288	down
EVM0005317	normal	EVM0005288	down
EVM0005583	normal	EVM0005288	down
EVM0007289	normal	EVM0005288	down
EVM0007926	normal	EVM0005288	down
EVM0009022	normal	EVM0005288	down
EVM0009582	normal	EVM0005288	down
EVM0013900	normal	EVM0005288	down
EVM0014636	normal	EVM0005288	down
EVM0017608	normal	EVM0005288	down
EVM0017837	normal	EVM0005288	down
EVM0019460	normal	EVM0005288	down
EVM0019503	normal	EVM0005288	down
EVM0020703	normal	EVM0005288	down
EVM0021379	normal	EVM0005288	down
EVM0024487	normal	EVM0005288	down
EVM0026311	normal	EVM0005288	down
EVM0030624	normal	EVM0005288	down
EVM0030872	normal	EVM0005288	down
EVM0033886	normal	EVM0005288	down
EVM0034544	normal	EVM0005288	down
EVM0035157	normal	EVM0005288	down
EVM0038415	normal	EVM0005288	down
EVM0039069	normal	EVM0005288	down
EVM0039137	normal	EVM0005288	down
EVM0040143	normal	EVM0005288	down
EVM0041667	normal	EVM0005288	down
EVM0044568	normal	EVM0005288	down
EVM0044805	normal	EVM0005288	down
EVM0015018	normal	EVM0015018	up
EVM0031634	normal	EVM0015018	up
EVM0038199	normal	EVM0015018	up
EVM0007375	normal	EVM0005815	down
EVM0019409	normal	EVM0019409	down
EVM0025657	normal	EVM0019409	down
EVM0034783	normal	EVM0019409	down
EVM0005718	normal	EVM0031871	up
EVM0030904	normal	EVM0031871	up
EVM0031871	normal	EVM0031871	up
EVM0039650	normal	EVM0031871	up
EVM0043676	normal	EVM0031871	up
EVM0007964	normal	EVM0036873	up
EVM0018779	normal	EVM0036873	up
EVM0026377	normal	EVM0036873	up
EVM0030795	normal	EVM0036873	up
EVM0034405	normal	EVM0036873	up
EVM0036873	normal	EVM0036873	up
EVM0001726	normal	EVM0004495	up
EVM0004495	normal	EVM0004495	up
EVM0027875	normal	EVM0004495	up
EVM0021588	normal	EVM0001985	down
EVM0024291	normal	EVM0001985	down
EVM0031506	normal	EVM0001985	down
EVM0039041	normal	EVM0001985	down
EVM0007928	normal	EVM0019144	up
EVM0019144	normal	EVM0019144	up
EVM0024586	normal	EVM0019144	up
EVM0008155	normal	EVM0016859	up
EVM0016859	normal	EVM0016859	up
EVM0008859	normal	EVM0008859	up
EVM0040293	normal	EVM0008859	up
EVM0043724	normal	EVM0008859	up
EVM0014364	normal	EVM0035713	down
EVM0022374	normal	EVM0035713	down
EVM0026506	normal	EVM0035713	down
EVM0020149	normal	EVM0020149	up
EVM0004096	normal	EVM0023914	up
EVM0010838	normal	EVM0023914	up
EVM0012245	normal	EVM0023914	up
EVM0023914	normal	EVM0023914	up
EVM0021381	normal	EVM0021381	up
EVM0028577	normal	EVM0021381	up
EVM0028848	normal	EVM0021381	up
EVM0029193	normal	EVM0021381	up
EVM0003997	normal	EVM0003997	up
EVM0017959	normal	EVM0003997	up
EVM0038942	normal	EVM0038942	down
EVM0027021	normal	EVM0030626	up
EVM0030626	normal	EVM0030626	up
EVM0041507	normal	EVM0030626	up
EVM0009597	normal	EVM0002216+EVM0025387	down
EVM0015359	normal	EVM0002216+EVM0025387	down
Apium_graveolens_newGene_5806	normal	EVM0023846	down
EVM0000080	normal	EVM0023846	down
EVM0010742	normal	EVM0023846	down
EVM0032645	normal	EVM0023846	down
EVM0038842	normal	EVM0023846	down
EVM0039513	normal	EVM0023846	down
EVM0041257	normal	EVM0023846	down

## Sheet: Sheet1
Table S12. The expression of DEGs/DEPs in different omics in cluster analysis
Gene ID	mRNA expression level	Gene ID	protein expression level
EVM0021505	up	EVM0010021	normal
EVM0030573	down	EVM0001746+EVM0013864+EVM0030573+EVM0030591	normal
EVM0013150	down	EVM0013150+EVM0028043	normal
EVM0000599	down	EVM0000599+EVM0012311+EVM0017534+EVM0025608	normal
EVM0009399	down	EVM0020918+EVM0026326+EVM0026886+EVM0036990	normal
EVM0020918	down	EVM0020918+EVM0026326+EVM0026886+EVM0036990	normal
EVM0043490	down	EVM0020918+EVM0026326+EVM0026886+EVM0036990	normal
EVM0044311	down	EVM0015549	normal
EVM0003365	up	Apium_graveolens_newGene_10419+EVM0002647+EVM0004358+EVM0007926+EVM0010608+EVM0013038+EVM0013833+EVM0017608+EVM0017837+EVM0019503+EVM0026311+EVM0030872+EVM0034984+EVM0038415+EVM0039069+EVM0040143+EVM0041667+EVM0044568	normal
EVM0005288	down	Apium_graveolens_newGene_10419+EVM0002647+EVM0004358+EVM0007926+EVM0010608+EVM0013038+EVM0013833+EVM0017608+EVM0017837+EVM0019503+EVM0026311+EVM0030872+EVM0034984+EVM0038415+EVM0039069+EVM0040143+EVM0041667+EVM0044568	normal
EVM0005997	up	Apium_graveolens_newGene_10419+EVM0002647+EVM0004358+EVM0007926+EVM0010608+EVM0013038+EVM0013833+EVM0017608+EVM0017837+EVM0019503+EVM0026311+EVM0030872+EVM0034984+EVM0038415+EVM0039069+EVM0040143+EVM0041667+EVM0044568	normal
EVM0028566	up	Apium_graveolens_newGene_10419+EVM0002647+EVM0004358+EVM0007926+EVM0010608+EVM0013038+EVM0013833+EVM0017608+EVM0017837+EVM0019503+EVM0026311+EVM0030872+EVM0034984+EVM0038415+EVM0039069+EVM0040143+EVM0041667+EVM0044568	normal
EVM0041733	up	Apium_graveolens_newGene_7588+EVM0001597+EVM0023397+EVM0032722+EVM0034429+EVM0038993+EVM0041733	normal
EVM0043570	down	EVM0006559+EVM0013657+EVM0043570	normal
EVM0008153	up	EVM0031634+EVM0036709	normal
EVM0016312	up	EVM0031634+EVM0036709	normal
EVM0036709	up	EVM0031634+EVM0036709	normal
EVM0044918	up	EVM0031634+EVM0036709	normal
EVM0032600	down	EVM0005704	normal
EVM0039311	down	EVM0005704	normal
EVM0024931	down	EVM0034522+EVM0037174	normal
EVM0037174	up	EVM0034522+EVM0037174	normal
Apium_graveolens_newGene_12045	up	EVM0007734+EVM0028640+EVM0037516	normal
EVM0011071	down	EVM0010031	normal
EVM0034117	down	EVM0010031	normal
EVM0028607	up	EVM0013814+EVM0030416+EVM0032660+EVM0033743	normal
EVM0036390	down	EVM0011353	normal
EVM0023346	up	Apium_graveolens_newGene_5642+EVM0021421	normal
EVM0003935	down	EVM0036982	normal
EVM0020910	up	EVM0035144+EVM0036225+EVM0040239	normal
EVM0004586	down	EVM0036121+EVM0038940	normal
EVM0033614	down	EVM0036121+EVM0038940	normal
EVM0007231	down	EVM0001111+EVM0010046+EVM0031828	normal
EVM0031423	down	EVM0001111+EVM0010046+EVM0031828	normal
EVM0013836	down	EVM0044287	normal
EVM0031656	down	EVM0044287	normal
EVM0016077	down	EVM0008994+EVM0013768+EVM0014413+EVM0016157+EVM0027989+EVM0039400+EVM0041125	normal
EVM0018101	down	EVM0008994+EVM0013768+EVM0014413+EVM0016157+EVM0027989+EVM0039400+EVM0041125	normal
EVM0012271	down	EVM0008351+EVM0017689+EVM0031460+EVM0032890	normal
EVM0029923	down	EVM0008351+EVM0017689+EVM0031460+EVM0032890	normal
EVM0034777	down	EVM0014352	normal
EVM0006320	down	EVM0025657	normal
EVM0018832	down	EVM0001805+EVM0026261+EVM0032377+EVM0040717	normal
EVM0042187	up	EVM0002818+EVM0009092	normal
EVM0008227	down	EVM0037189	normal
EVM0020680	down	EVM0037189	normal
EVM0023697	down	EVM0037189	normal
EVM0037189	down	EVM0037189	normal
EVM0042246	down	EVM0037189	normal
EVM0042416	down	EVM0037189	normal
EVM0009918	down	EVM0000968+EVM0022817+EVM0039625+EVM0044430	normal
EVM0035432	down	EVM0014795+EVM0039165	normal
EVM0022038	down	EVM0003977+EVM0022038	normal
EVM0043980	down	EVM0024014+EVM0034866+EVM0040215	normal
EVM0039031	down	Apium_graveolens_newGene_10884+EVM0005912+EVM0038049+EVM0038659+EVM0039853	normal
EVM0024592	up	EVM0005048	normal
EVM0017039	down	EVM0009473+EVM0042875	normal
EVM0006239	down	EVM0002274	normal
EVM0036031	down	EVM0030795	normal
EVM0005623	down	EVM0003413+EVM0005623+EVM0032967	normal
Apium_graveolens_newGene_2327	down	EVM0027309+EVM0037439	normal
EVM0007151	down	EVM0027309+EVM0037439	normal
Apium_graveolens_newGene_4421	down	Apium_graveolens_newGene_4421+EVM0030960	normal
Apium_graveolens_newGene_4422	down	Apium_graveolens_newGene_4421+EVM0030960	normal
EVM0018106	down	EVM0042051	normal
EVM0030322	down	EVM0004668	normal
EVM0019396	down	EVM0013297	normal
EVM0020723	down	EVM0026029+EVM0037591	normal
EVM0039220	down	EVM0026029+EVM0037591	normal
EVM0013940	down	EVM0005026+EVM0007064+EVM0010155+EVM0010706+EVM0013940+EVM0018258+EVM0043378+EVM0044930	normal
EVM0024570	down	EVM0005026+EVM0007064+EVM0010155+EVM0010706+EVM0013940+EVM0018258+EVM0043378+EVM0044930	normal
EVM0001394	down	EVM0014436+EVM0024291+EVM0031506+EVM0039041	normal
EVM0001985	down	EVM0014436+EVM0024291+EVM0031506+EVM0039041	normal
EVM0007563	down	EVM0014436+EVM0024291+EVM0031506+EVM0039041	normal
EVM0014436	down	EVM0014436+EVM0024291+EVM0031506+EVM0039041	normal
EVM0033263	down	EVM0014436+EVM0024291+EVM0031506+EVM0039041	normal
EVM0025770	down	EVM0002642+EVM0025770+EVM0036861	normal
EVM0020096	down	EVM0037368	normal
Apium_graveolens_newGene_4393	up	EVM0036444+EVM0043184	normal
EVM0030468	down	EVM0030468	normal
EVM0035713	down	EVM0022374	normal
EVM0037392	down	EVM0022374	normal
EVM0015173	down	EVM0010242+EVM0015173	normal
EVM0003670	down	EVM0027589	normal
EVM0016736	down	EVM0023565+EVM0029686	normal
EVM0002903	down	Apium_graveolens_newGene_10264+EVM0023144+EVM0041261	normal
EVM0003806	down	Apium_graveolens_newGene_10264+EVM0023144+EVM0041261	normal
EVM0028815	down	EVM0031577	normal
EVM0015587	down	EVM0007405+EVM0026444	normal
EVM0044028	down	EVM0044326	normal
EVM0000584	down	EVM0006702+EVM0020335+EVM0020419	normal
EVM0011692	down	Apium_graveolens_newGene_4711+EVM0011310+EVM0024412+EVM0026275+EVM0040575+EVM0042735	normal
EVM0041196	down	EVM0039820	normal
EVM0011230	down	EVM0011230+EVM0036433+EVM0039411	normal
EVM0013786	up	EVM0009231+EVM0014093	normal
EVM0041213	up	Apium_graveolens_newGene_7374+EVM0012856+EVM0041213	normal
EVM0002084	down	EVM0020099+EVM0043783	normal
EVM0041417	down	EVM0020099+EVM0043783	normal
EVM0036125	down	EVM0006981+EVM0016318+EVM0016915+EVM0019659	normal
EVM0041849	down	EVM0002340+EVM0004440+EVM0006861+EVM0018235+EVM0043435	normal
EVM0017069	down	Apium_graveolens_newGene_11808+EVM0017069+EVM0022861	normal
EVM0021387	up	EVM0010545+EVM0044360	normal
EVM0000736	down	EVM0002534+EVM0004202+EVM0005561+EVM0008325+EVM0015635	normal
EVM0002371	up	EVM0002534+EVM0004202+EVM0005561+EVM0008325+EVM0015635	normal
EVM0020655	down	EVM0002534+EVM0004202+EVM0005561+EVM0008325+EVM0015635	normal
EVM0029822	down	EVM0002534+EVM0004202+EVM0005561+EVM0008325+EVM0015635	normal
EVM0021848	up	EVM0013050+EVM0014385	normal
EVM0027328	up	EVM0027328	normal
Apium_graveolens_newGene_9472	down	EVM0019639+EVM0029555	normal
EVM0035484	down	EVM0014879+EVM0024053+EVM0025948+EVM0027509+EVM0037517+EVM0038702+EVM0039342	normal
EVM0004150	down	EVM0030359+EVM0043701	normal
EVM0017364	down	EVM0005271	normal
EVM0032241	down	EVM0017824+EVM0034598	normal
EVM0037354	down	EVM0017824+EVM0034598	normal
EVM0041144	down	EVM0017824+EVM0034598	normal
EVM0000923	down	EVM0000923+EVM0001097+EVM0020329	normal
EVM0009764	down	EVM0000175+EVM0017908+EVM0032236+EVM0040121	normal
EVM0017908	down	EVM0000175+EVM0017908+EVM0032236+EVM0040121	normal
EVM0008825	down	Apium_graveolens_newGene_9128+EVM0017249+EVM0025908	normal
EVM0023795	down	Apium_graveolens_newGene_9128+EVM0017249+EVM0025908	normal
EVM0044582	down	Apium_graveolens_newGene_9128+EVM0017249+EVM0025908	normal
EVM0033682	up	EVM0011169+EVM0033682	normal
EVM0041100	down	EVM0001738+EVM0003520+EVM0021762	normal
EVM0008529	down	EVM0014167+EVM0044993	normal
EVM0014167	down	EVM0014167+EVM0044993	normal
EVM0044993	down	EVM0014167+EVM0044993	normal
EVM0032458	down	EVM0016895+EVM0018807	normal
EVM0013598	down	EVM0016972	normal
EVM0025436	down	EVM0006561	normal
EVM0007425	down	EVM0022869	normal
EVM0026793	down	EVM0009048	normal
EVM0041675	down	EVM0042905	normal
EVM0011414	down	EVM0028886	normal
EVM0028886	down	EVM0028886	normal
EVM0042066	down	EVM0002929+EVM0011781+EVM0029159	normal
EVM0001870	down	EVM0022232+EVM0026918+EVM0040767+EVM0043958	normal
EVM0015643	down	EVM0022232+EVM0026918+EVM0040767+EVM0043958	normal
EVM0018341	down	EVM0022232+EVM0026918+EVM0040767+EVM0043958	normal
EVM0020435	down	EVM0022449	normal
EVM0021959	down	EVM0022449	normal
EVM0022449	down	EVM0022449	normal
EVM0000938	down	EVM0010598+EVM0019277+EVM0025864+EVM0033713	normal
EVM0015795	up	EVM0010598+EVM0019277+EVM0025864+EVM0033713	normal
EVM0020004	down	EVM0010598+EVM0019277+EVM0025864+EVM0033713	normal
EVM0020902	up	EVM0010598+EVM0019277+EVM0025864+EVM0033713	normal
EVM0021111	up	EVM0010598+EVM0019277+EVM0025864+EVM0033713	normal
EVM0028705	up	EVM0010598+EVM0019277+EVM0025864+EVM0033713	normal
EVM0018189	down	EVM0011197	normal
EVM0003591	up	EVM0007215+EVM0022072+EVM0042483	normal
EVM0022072	up	EVM0007215+EVM0022072+EVM0042483	normal
EVM0025817	up	EVM0007215+EVM0022072+EVM0042483	normal
EVM0028800	up	EVM0007215+EVM0022072+EVM0042483	normal
EVM0035711	down	EVM0007215+EVM0022072+EVM0042483	normal
EVM0010538	down	EVM0034235+EVM0035781	normal
EVM0019724	up	EVM0034235+EVM0035781	normal
EVM0036053	down	EVM0034235+EVM0035781	normal
EVM0038103	up	EVM0034235+EVM0035781	normal
EVM0011261	up	EVM0020139+EVM0033092	normal
EVM0019111	down	EVM0019111	normal
EVM0041252	up	EVM0019111	normal
EVM0027855	down	EVM0027021	normal
EVM0010439	down	EVM0021412+EVM0036410+EVM0044829	normal
EVM0003625	down	EVM0001929	normal
Apium_graveolens_newGene_2405	down	EVM0028440	normal
EVM0044096	down	EVM0005377+EVM0022870	normal
EVM0007622	down	EVM0007622	normal
EVM0030182	down	EVM0007622	normal
EVM0001091	down	EVM0030756	normal
EVM0002392	down	EVM0038470	normal
EVM0023275	up	EVM0038470	normal
EVM0032817	up	EVM0038470	normal
EVM0016881	down	EVM0009597	normal
EVM0025387	down	EVM0009597	normal
EVM0021257	up	EVM0006734+EVM0017164+EVM0018164+EVM0021257	normal
EVM0036742	down	EVM0013536	normal
EVM0003272	up	EVM0044049	normal
EVM0004147	down	EVM0038023+EVM0039967	normal
Apium_graveolens_newGene_8191	down	EVM0000720	normal
EVM0012749	down	EVM0026857	normal
